# Supplementary material for: Patient Heterogeneity in Acute Myeloid Leukemia: Leukemic Cell Communication by Release of Soluble Mediators and Its Effects on Mesenchymal Stem Cells
Source: MDPI journal article supplement (doi:10.3390/diseases9040074), 2021-10-16
Supplement: s1 [file s1]

## **SUPPLEMENTARY INFORMATION**

# **Effects of constitutive soluble mediator release by acute myeloid leukemia cells on the proteomic profiles of bone marrow mesenchymal stem cell; a focus on patient heterogeneity**

**Elise Aasebø, Annette K. Brenner, Maria Hernandez-Valladares, Even Birkeland, Olav Mjaavatn, Håkon Reikvam, Frode Selheim, Frode S. Berven and Øystein Bruserud \***

**Table S1.** Clinical and biological characteristics of the patients included in the study. The patients are listed according to the three subsets (yellow, brown and dark brown color, respectively) identified in Figure 2 in the article. CD34 positivity was defined as at least 20% positive cells in flow cytometric analysis. The three exceptional patients identified in Figure 1 (left part) of the article are marked with yellow in the Id column to the left in the table (patients 8, 9 and 10). The survival columns indicates (i) patients receiving intensive and potentially curative antileukemic treatment possibly including allogeneic stem cell transplantation; the survival is presented as months after start of therapy (yellow background; the sign > indicates that the patient is still alive without AML at the indicated time whereas the other patients are dead due to relapse unless otherwise stated); (ii) some of the elderly and unfit patients (indicated by green background, all patients surviving for less than 3 months) received low-toxicity AML-stabilizing therapy based on hydroxyurea, 5-mercaptopurine, low-dose cytarabine or azacitidine (survival in parenthesis); and (iii) the last group received only supportive care including antibiotic therapy and transfusions (blue background, all of them surviving less than 3 months).

| Id | Gender | Age | Predisposition/previous hematological disease | FAB  | Cytogenetics               | FLT3 status | NPM1 status | CD34 | Survival                            |
|----|--------|-----|-----------------------------------------------|------|----------------------------|-------------|-------------|------|-------------------------------------|
| 1  | M      | 41  | MDS                                           | M1   | t(8;21) del(9) - 20 -22 -3 | wt          | wt          | pos  | >6 months                           |
| 2  | M      | 59  |                                               | M5   | del(20), +8                | ITD         | wt          | pos  | 29 months                           |
| 3  | F      | 78  |                                               | M1   | Normal                     | ITD         | ins         | neg  | AML stabilizing therapy (2 months)  |
| 4  | M      | 42  |                                               | M2   | Normal                     | ITD         | wt          | Pos  | >118 months                         |
| 5  | F      | 55  |                                               | M2   | Normal                     | ITD         | ins         | Neg  | 24 months                           |
| 6  | M      | 87  | Chronic myelofibrosis                         | M1   | del(20)                    | wt          | wt          | Pos  | Supportive care                     |
| 7  | F      | 77  |                                               | M1   | Nt                         | nt          | ins         | Neg  | Supportive care                     |
| 8  | M      | 78  | CMML 9 months                                 | M4   | +8                         | nt          | nt          | Neg  | Supportive care                     |
| 9  | M      | 79  | MDS 2 years                                   | M2   | +8, -9                     | wt          | wt          | Pos  | Supportive care                     |
| 10 | M      | 72  | MDS                                           | M4   | Normal                     | nt          | nt          | Neg  | Supportive care                     |
| 11 | M      | 20  |                                               | M2   | Normal                     | ITD         | wt          | Pos  | 27 months                           |
| 12 | M      | 71  |                                               | M4/5 | Nt                         | nt          | nt          | nt   | AML stabilizing therapy (< 1 month) |
| 13 | F      | 68  |                                               | M5   | Normal                     | wt          | ins         | Neg  | <1 month (toxic death)              |
| 14 | F      | 87  |                                               | M0   | del(5)                     | wt          | wt          | Pos  | AML stabilizing therapy (< 1 month) |
| 15 | F      | 63  |                                               | M1   | Normal                     | wt          | wt          | Pos  | 5 months                            |
| 16 | M      | 46  |                                               | M1   | Normal                     | wt          | ins         | Nt   | 26 months                           |
| 17 | M      | 36  |                                               | M5   | +8, +22, inv(16)           | ITD         | wt          | Pos  | 27 months (toxic death in relapse)  |
| 18 | M      | 78  |                                               | M1   | Multiple                   | nt          | nt          | Pos  | Supportive care                     |
| 19 | F      | 77  |                                               | M1   | Normal                     | wt          | wt          | Pos  | AML stabilizing therapy (1 month)   |

|    |   |    |                      |      |              |     |     |     |                                      |
|----|---|----|----------------------|------|--------------|-----|-----|-----|--------------------------------------|
| 20 | F | 71 | MDS, now AML relapse |      | del(12)      | nt  | nt  | Pos | 26 months                            |
| 21 | F | 57 |                      | M4   | inv16        | wt  | wt  | Pos | 14 months (denied further treatment) |
| 22 | F | 79 |                      |      | Normal       | ITD | ins | Pos | AML stabilizing therapy (2 months)   |
| 23 | F | 67 | Relapsed AML         | M0   | +21          | wt  | wt  | Pos | 7 months                             |
| 24 | M | 78 |                      | M1   | Normal       | wt  | wt  | pos | Supportive care                      |
| 25 | F | 46 | MDS                  | M4   | Normal       | ITD | Ins | pos | 7 months                             |
| 26 | F | 74 |                      | M5   | Normal       | ITD | ins | neg | Supportive care                      |
| 27 | F | 71 |                      | M0   | Normal       | wt  | ins | neg | Supportive care                      |
| 28 | M | 82 |                      |      | +8           | wt  | wt  | pos | Supportive care                      |
| 29 | F | 77 |                      | M1/2 | Normal       | ITD | ins | nt  | AML stabilizing therapy (1 month)    |
| 30 | F | 18 | MDS 6 months         | M4   | Inv(16)      | wt  | wt  | Pos | > 120 months                         |
| 31 | M | 60 |                      | M5   | t(10;11), +8 | wt  | wt  | Nt  | 16 months                            |
| 32 | M | 76 |                      |      | Normal       | nt  | nt  | Pos | Supportive care                      |
| 33 | F | 46 | MDS                  | M2   | inv(13)      | wt  | wt  | Pos | 29 months                            |
| 34 | F | 55 |                      | M1   | Normal       | ITD | ins | Pos | 8 months                             |
| 35 | M | 76 |                      | M5   | del(12), -7  | nt  | nt  | Pos | AML stabilizing therapy (1 month)    |
| 36 | F | 66 | Relapsed AML         | M4/5 | t(9;15)      | ITD | wt  | Neg | AML stabilizing therapy (2 month)    |
| 37 | F | 72 |                      | M2   | Normal       | ITD | ins | Pos | Supportive care                      |
| 38 | M | 19 |                      | M5   | Normal       | wt  | wt  | Neg | > 66 months                          |
| 39 | M | 48 |                      | M5   | Normal       | ITD | ins | Nt  | 7 months                             |
| 40 | M | 64 |                      | M5   | Normal       | wt  | ins | Neg | <1 month (toxic)                     |
| 41 | M | 83 |                      | M1   | Nt           | wt  | wt  | Pos | Supportive care                      |

Abbreviations: F, female; FAB, French-American-British; ITD, internal tandem duplication; ins, insertion; M, male; MDS, myelodysplastic syndrome; neg, negative; nt, not tested; pos, positive; wt, wild type.

**Table S2.** Proteomic analysis of MSC lysates derived from cells exposed to AML conditioned medium (i.e. AML cell culture supernatants); a comparison of the two patient clusters identified in Figure 2. AML cells were cultured for 48 hours before supernatants were harvested. Bone marrow MSCs derived from a healthy individual were cultured in the presence of AML supernatants (referred to as AML conditioned medium) for 48 hours before the MSCs proteome was analyzed. A hierarchical clustering analysis of the MSC proteome identified two cell patient subsets. The table presents those proteins that could be quantified for (i) at least five of the 10 patients in the upper yellow cluster but only three or less of the 31 patients in the brown lower cluster; or (ii) for at least 15 of the 31 patients in the brown cluster but for three or less patients in the yellow cluster). The table presents the gene name and the protein name, counts cluster 2 and counts cluster 1 represent the number of patients with quantified protein levels for each of the two main patient clusters identified in Figure 2, the Key words reflect main protein characteristics according to the Human Protein Atlas ([The Human Protein Atlas](#) accessed 30.07.2021). The Prognostic impact in cancer column to the right indicates whether a prognostic impact of the protein has been observed for any form of cancer according to the Human Protein Atlas. **Red color** column indicates higher levels in upper yellow main patent cluster that included 10 patients; **blue color** indicates higher levels in the lower brown main patient cluster 1 including 31 patients.

|  |                                                                                              |    |
|--|----------------------------------------------------------------------------------------------|----|
|  | Intercellular communication, adhesion, extracellular matrix, receptor proteins               | 17 |
|  | Golgi/endoplasmic reticulum/lysosome/vesicle proteins, cytoskeleton, intracellular transport | 12 |
|  | Mitochondria, metabolism                                                                     | 5  |
|  | RNA/DNA binding, protein synthesis                                                           | 10 |

| Gene Symbol                                                                                                                                  | Description                                         | Cluster 2 (n=10);<br>patient count | Cluster 1 (n=31);<br>patient count | Key words                                                          | Prognostic impact<br>in cancer |
|----------------------------------------------------------------------------------------------------------------------------------------------|-----------------------------------------------------|------------------------------------|------------------------------------|--------------------------------------------------------------------|--------------------------------|
| Common in the upper yellow cluster (at least 5 patients in the upper yellow cluster, three or less patients in the lower brown main cluster) |                                                     |                                    |                                    |                                                                    |                                |
| <i>LAIR1</i>                                                                                                                                 | Leukocyte-associated immunoglobulin-like receptor 1 | 6                                  | 1                                  | Plasma membrane receptor protein                                   | A                              |
| <i>RTN4</i>                                                                                                                                  | Isoform C of Reticulon-4                            | 6                                  | 3                                  | Endoplasmic reticulum, nuclear envelope, intracellular trafficking | A                              |
| <i>CAMP</i>                                                                                                                                  | Cathelicidin antimicrobial peptide                  | 5                                  | 2                                  | Chemotactic protein                                                | F                              |
| <i>CYP4F3</i>                                                                                                                                | Cytochrome P450 4F3                                 | 5                                  | 2                                  | Endoplasmic reticulum, fatty acid metabolism                       | -                              |
| <i>IGSF6</i>                                                                                                                                 | Immunoglobulin superfamily member 6                 | 5                                  | 1                                  | Cytoplasmic protein                                                | F                              |
| <i>IL3RA</i>                                                                                                                                 | Interleukin-3 receptor subunit alpha                | 5                                  | 2                                  | IL3 receptor chain alpha                                           | F                              |
| <i>DEFA4</i>                                                                                                                                 | Neutrophil defensin 4                               | 5                                  | 2                                  | Secreted host defense protein                                      | -                              |
| <i>PGLYRP1</i>                                                                                                                               | Peptidoglycan recognition protein 1                 | 5                                  | 3                                  | Pattern receptor, vesicles, nucleoplasm                            | -                              |

|                                                                                                                                                                       |                                                           |   |    |                                                                                  |     |
|-----------------------------------------------------------------------------------------------------------------------------------------------------------------------|-----------------------------------------------------------|---|----|----------------------------------------------------------------------------------|-----|
| <i>PIK3R6</i>                                                                                                                                                         | Phosphoinositide 3-kinase regulatory subunit 6            | 5 | 3  | Signaling downstream to G-protein coupled receptors                              | A   |
| <i>PTGS2</i>                                                                                                                                                          | Prostaglandin G/H synthase 2                              | 5 | 3  | Endoplasmic reticulum, fatty acid metabolism, dual cyclooxygenase and peroxidase | A   |
| <i>RETN</i>                                                                                                                                                           | Resistin                                                  | 5 | 3  | Chemotaxis                                                                       | -   |
| <i>SYTL1</i>                                                                                                                                                          | Synaptotagmin-like protein 1                              | 5 | 3  | Vesicle trafficking, exocytosis                                                  | F/A |
| <i>LAIR1</i>                                                                                                                                                          | Leukocyte-associated immunoglobulin-like receptor 1       | 6 | 1  | Plasma membrane, receptor protein                                                | A   |
| <b>Common in the lower brown main patient cluster (at least 15 patients in the lower brown main cluster, three or less patients in the upper yellow main cluster)</b> |                                                           |   |    |                                                                                  |     |
| <i>LTBP4</i>                                                                                                                                                          | Latent-transforming growth factor beta-binding protein 4  | 2 | 24 | TGF regulation                                                                   | A   |
| <i>BCAM</i>                                                                                                                                                           | Basal cell adhesion molecule                              | 3 | 23 | Laminin cell surface receptor                                                    | F/A |
| <i>COL8A2</i>                                                                                                                                                         | Collagen alpha-2(VIII) chain                              | 3 | 23 | Adhesion molecule                                                                | F/A |
| <i>SGCG</i>                                                                                                                                                           | Gamma-sarcoglycan                                         | 2 | 23 | ECM-cytoskeleton linking                                                         | -   |
| <i>CD99</i>                                                                                                                                                           | CD99 antigen                                              | 2 | 22 | Cell adhesion and migration                                                      | A   |
| <i>FNI</i>                                                                                                                                                            | Isoform 10 of Fibronectin                                 | 2 | 22 | Cell adhesion                                                                    | A   |
| <i>NUAK1</i>                                                                                                                                                          | NUAK family SNF1-like kinase 1                            | 1 | 22 | Kinase that controls cell adhesion                                               | A   |
| <i>AP5S1</i>                                                                                                                                                          | AP-5 complex subunit sigma-1                              | 3 | 21 | Adaptor protein involved in endosomal transport                                  | F   |
| <i>SLC39A6</i>                                                                                                                                                        | Zinc transporter ZIP6 OS=Homo sapiens                     | 3 | 20 | Ion transport (probably Zn)                                                      | A   |
| <i>CPED1</i>                                                                                                                                                          | Cadherin-like and PC-esterase domain-containing protein 1 | 2 | 20 | Nucleoplasm                                                                      | F/A |
| <i>DTNBP1</i>                                                                                                                                                         | Dysbindin OS=Homo sapiens OX=9606 GN=DTNBP1 PE=1 SV=1     | 2 | 20 | Organelle biogenesis and vesicle trafficking.                                    | F/A |
| <i>FLNB</i>                                                                                                                                                           | Filamin-B                                                 | 1 | 20 | Actinbinding, cytoskeleton                                                       | F/A |
| <i>FOXO3</i>                                                                                                                                                          | Forkhead box protein O3                                   | 3 | 19 | Transcription factor                                                             | -   |
| <i>IDS</i>                                                                                                                                                            | Iduronate 2-sulfatase                                     | 3 | 19 | Sulfatase, lysosome                                                              | -   |
| <i>CCSER2</i>                                                                                                                                                         | Serine-rich coiled-coil domain-containing protein 2       | 2 | 19 | Nucleoplasm and cytosol, microtubule-binding                                     | -   |
| <i>DKK3</i>                                                                                                                                                           | Dickkopf-related protein 3                                | 3 | 18 | Regulation of Wnt signaling                                                      | -   |
| <i>EIF5A2</i>                                                                                                                                                         | Eukaryotic translation initiation factor 5A-2             | 3 | 18 | Elongation factor, RNA binding                                                   | A   |
| <i>GAP43</i>                                                                                                                                                          | Neuromodulin                                              | 3 | 18 | Calmodulin-binding                                                               | -   |
| <i>MYO6</i>                                                                                                                                                           | Isoform 2 of Unconventional myosin-VI                     | 1 | 18 | Actin-binding, intracellular transport                                           | F   |
| <i>EFHD1</i>                                                                                                                                                          | EF-hand domain-containing protein D1                      | 1 | 18 | Calciumbinding, mitochondrial calcium sensor, cytoskeletal rearrangement         | F   |

|                |                                                              |   |    |                                                 |      |
|----------------|--------------------------------------------------------------|---|----|-------------------------------------------------|------|
| <i>HSBP1</i>   | Heat shock factor-binding protein 1                          | 1 | 18 | Transcriptional regulation                      | F    |
| <i>MRFAP1</i>  | MORF4 family-associated protein 1                            | 3 | 17 | Nucleoplasm                                     | F    |
| <i>SLC43A1</i> | Large neutral amino acids transporter small subunit 3        | 3 | 17 | Golgi, intracellular transport                  | F/A  |
| <i>ATN1</i>    | Atrophin-1                                                   | 2 | 17 | Nucleoplasm, transcriptional regulator          | A    |
| <i>NCAM1</i>   | Isoform 2 of Neural cell adhesion molecule 1                 | 2 | 17 | Cell adhesion                                   | F/A  |
| <i>HNRNPA3</i> | Isoform 2 of Heterogeneous nuclear ribonucleoprotein A3      | 3 | 16 | Nucleoplasm, RNA binding                        | F/A  |
| <i>LPL</i>     | Lipoprotein lipase                                           | 3 | 16 | Triglyceride metabolism                         | A    |
| <i>SLC16A2</i> | Monocarboxylate transporter 8                                | 3 | 16 | Intracellular transport                         | A    |
| <i>NDEL1</i>   | Nuclear distribution protein nudE-like 1                     | 3 | 16 | Cytoskeleton, microtubules                      | -    |
| <i>OSBP2</i>   | Oxysterol-binding protein 2 OS=Homo sapiens                  | 3 | 16 | Lipid transport                                 | F    |
| <i>PDE4DIP</i> | Myomegalin OS=Homo sapiens                                   | 1 | 16 | Golgi                                           | -    |
| <i>MMP3</i>    | Stromelysin-1 OS=Homo sapiens                                | 1 | 16 | Degrades several extracellular matrix molecules | A    |
| <i>GDAP1</i>   | Ganglioside-induced differentiation-associated protein 1     | 3 | 15 | Mitochondria                                    | F/A  |
| <i>TTC31</i>   | Tetratricopeptide repeat protein 31                          | 3 | 15 | Cytosol and nucleoplasm                         | FA/A |
| <i>ZNF574</i>  | Zinc finger protein 574                                      | 3 | 15 | DNA binding, transcriptional regulation         | -    |
| <i>POLR2M</i>  | DNA-directed RNA polymerase II subunit GRINL1A, isoforms 4/5 | 2 | 15 | RNA polymerase                                  | -    |
| <i>DSG2</i>    | Desmoglein-2 OS=Homo sapiens OX=9606 GN=DSG2 PE=1 SV=2       | 1 | 15 | Cell adhesion, desmosome                        | F/A  |
| <i>RETN</i>    | Resistin                                                     | 5 | 3  | Chemotaxis                                      | -    |
| <i>SYTL1</i>   | Synaptotagmin-like protein 1                                 | 5 | 3  | Vesicle trafficking, exocytosis                 | F/A  |
| <i>LAIR1</i>   | Leukocyte-associated immunoglobulin-like receptor 1          | 6 | 1  | Plasma membrane, receptor protein               | A    |

**Table S3.** Proteomic analysis of AML cell supernatants, a comparison of the two patient clusters identified in Figure 2. AML cells were cultured for 48 hours before supernatants were harvested. Bone marrow MSCs derived from a healthy individual were cultured in the presence of AML supernatants (referred to as AML conditioned medium) for 48 hours before the MSCs proteome was analyzed. A hierarchical clustering analysis of the MSC proteome identified two cell patient subsets. The table presents those proteins that could be quantified for at least three patients in each of the two patients clusters/subsets and showed a statistically significant difference between the two groups (defined as a p-value <0.01 both for the t-test and for the Z-statistics of fold changes). The table presents the gene name and the protein name, counts cluster 2 and counts cluster 1 represent the number of patients with quantified protein levels for each of the two main patient clusters identified in Figure 2, the Key words reflect main protein characteristics according to the Human Protein Atlas ([The Human Protein Atlas](#) accessed 210730), and the Prognostic impact in cancer column to the right indicate whether a prognostic impact of the protein has been observed for any form of cancer according to the Human Protein Atlas. **Red color** of the gene name column indicates higher levels in the upper yellow patient cluster that included 10 patients; **blue color** indicates higher levels in the lower main patient cluster 1 including 31 patients.

|  |                                                                                              |            |
|--|----------------------------------------------------------------------------------------------|------------|
|  | Intercellular communication, adhesion, extracellular matrix                                  | 9 proteins |
|  | Golgi/endoplasmic reticulum/lysosome/vesicle proteins, cytoskeleton, intracellular transport | 3 proteins |
|  | Proteases, protease inhibitors                                                               | 2 proteins |
|  | RNA/DNA binding, protein synthesis                                                           | 4 proteins |

| Gene name     | Protein names                                                                                                                         | Cluster 2 (n=10);<br>patient count | Cluster 1 (n=31);<br>patient count | Key words                               | Prognostic impact<br>in cancer |
|---------------|---------------------------------------------------------------------------------------------------------------------------------------|------------------------------------|------------------------------------|-----------------------------------------|--------------------------------|
| <i>RPN1</i>   | Dolichyl-diphosphooligosaccharide--protein glycosyltransferase subunit 1                                                              | 7                                  | 7                                  | Endoplasmic reticulum                   | A                              |
| <i>IMMT</i>   | MICOS complex subunit MIC60                                                                                                           | 10                                 | 19                                 | Mitochondria                            | F/A                            |
| <i>HADHB</i>  | Trifunctional enzyme subunit beta, mitochondrial;3-ketoacyl-CoA thiolase                                                              | 8                                  | 11                                 | Mitochondria, lipid metabolism          | F                              |
| <i>MPO</i>    | Myeloperoxidase;Myeloperoxidase;89 kDa myeloperoxidase;84 kDa myeloperoxidase;Myeloperoxidase light chain;Myeloperoxidase heavy chain | 10                                 | 30                                 | Azurophilic granule                     | .                              |
| <i>CYB5R3</i> | NADH-cytochrome b5 reductase 3;NADH-cytochrome b5 reductase 3 membrane-bound form;NADH-cytochrome b5 reductase 3 soluble form         | 8                                  | 16                                 | Endoplasmic reticulum, lipid metabolism | A                              |
| <i>BANF1</i>  | Barrier-to-autointegration factor;Barrier-to-autointegration factor, N-terminally processed                                           | 10                                 | 30                                 | DNA binding, chromatin organization     | -                              |
| <i>RPS19</i>  | 40S ribosomal protein S19                                                                                                             | 7                                  | 29                                 | Ribosomal protein                       | A                              |
| <i>TGM2</i>   | Protein-glutamine gamma-glutamyltransferase 2                                                                                         | 8                                  | 18                                 | Plasma membrane, protein crosslinking   | A                              |

|                 |                                                                                                             |    |    |                                                                                     |     |
|-----------------|-------------------------------------------------------------------------------------------------------------|----|----|-------------------------------------------------------------------------------------|-----|
| <i>SRSF3</i>    | Serine/arginine-rich splicing factor 3                                                                      | 5  | 21 | Nucleosome, RNA splicing                                                            | A/F |
| <i>EPRS</i>     | Bifunctional glutamate/proline--tRNA ligase;Glutamate--tRNA ligase;Proline--tRNA ligase                     | 10 | 27 | RNA binding, protein syntesis                                                       | A   |
| <i>PUF60</i>    | Poly(U)-binding-splicing factor PUF60                                                                       | 7  | 25 | RNA processing/splicing                                                             | -   |
| <i>MFGE8</i>    | Lactadherin;Lactadherin short form;Medin                                                                    | 5  | 20 | Secreted membrane protein, implicated in angiogenesis and carcinogenesis.           | A   |
| <i>COL5A2</i>   | Collagen alpha-2(V) chain                                                                                   | 10 | 30 | Extracellular matrix                                                                | A   |
| <i>PAPPA</i>    | Pappalysin-1                                                                                                | 6  | 26 | Secreted metalloprotease, IGF regulator                                             | -   |
| <i>IGFBP7</i>   | Insulin-like growth factor-binding protein 7                                                                | 10 | 30 | Low-affinity IGF binding, regulates IGF availability and involved in cell adhesion. | F/A |
| <i>QSOX1</i>    | Sulfhydryl oxidase 1                                                                                        | 10 | 30 | Oxidoreductase, located to Golgi and vesicles, secreted protein.                    | A   |
| <i>C1R</i>      | Complement C1r subcomponent;Complement C1r subcomponent heavy chain;Complement C1r subcomponent light chain | 6  | 28 | Complement activation, protease                                                     | A   |
| <i>ICAM1</i>    | Intercellular adhesion molecule 1                                                                           | 3  | 12 | Adhesion molecule                                                                   | F/A |
| <i>MMP19</i>    | Matrix metalloproteinase-19                                                                                 | 4  | 12 | Matrix metalloprotease, degrades various extracellular matrix molecules             | F/A |
| <i>EMILIN2</i>  | EMILIN-2                                                                                                    | 4  | 12 | Extracellular matrix protein                                                        | A   |
| <i>DCN</i>      | Decorin                                                                                                     | 9  | 30 | Extracellular matrix molecule                                                       | A   |
| <i>SERPINE2</i> | Glia-derived nexin                                                                                          | 10 | 30 | Protease inhibitor                                                                  | A   |



**Table S4.** Proteomic analysis of AML cell supernatants, a comparison of the two patient clusters identified in Figure 2. AML cells were cultured for 48 hours before supernatants were harvested. Bone marrow MSCs derived from a healthy individual were cultured in the presence of AML supernatants (referred to as AML conditioned medium) for 48 hours before the MSCs proteome was analyzed. A hierarchical clustering analysis of the MSC proteome identified two cell patient subsets. The table presents those proteins that could be either (i) for at least five patients in the smaller upper/yellow cluster 2 but three or less patients in the larger main lower/brown cluster; or (ii) at least 15 patients in the larger/brown main patient cluster but three or less patients in the smaller upper/yellow cluster. The table presents the gene name and the protein name, counts cluster 2 and counts cluster 1 represent the number of patients with quantified protein levels for each of the two main patient clusters identified in Figure 2, the Key words reflect main protein characteristics according to the Human Protein Atlas ([The Human Protein Atlas](#) accessed 30.07.21), and the Prognostic impact in cancer column to the right indicate whether a prognostic impact of the protein has been observed for any form of cancer according to the Human Protein Atlas.

|                                                                                              |             |
|----------------------------------------------------------------------------------------------|-------------|
| Intercellular communication, adhesion, extracellular matrix                                  | 22 proteins |
| Golgi/endoplasmic reticulum/lysosome/vesicle proteins, cytoskeleton, intracellular transport | 22 proteins |
| Proteases, protease inhibitors                                                               | 2 proteins  |
| Intracellular signaling                                                                      | 4 proteins  |

| Gene name                                                                                                                                                                    | Protein names                                              | Cluster 2 (n=10);<br>patient count | Cluster 1 (n=31);<br>patient count | Key words                                                          | Prognostic<br>impact in cancer |
|------------------------------------------------------------------------------------------------------------------------------------------------------------------------------|------------------------------------------------------------|------------------------------------|------------------------------------|--------------------------------------------------------------------|--------------------------------|
| <b>Common in the upper yellow main patient cluster (at least 5 patients of the 10 patients in this cluster, only three or less patients in the lower brown main cluster)</b> |                                                            |                                    |                                    |                                                                    |                                |
| <i>MAP2K1</i>                                                                                                                                                                | Dual specificity mitogen-activated protein kinase kinase 1 | 6                                  | 1                                  | Cell signaling, MAP kinase pathway                                 | A                              |
| <i>UNC13D</i>                                                                                                                                                                | Protein unc-13 homolog D                                   | 6                                  | 3                                  | Exocytosis, vesicle formation                                      | A                              |
| <i>ZPR1</i>                                                                                                                                                                  | Zinc finger protein ZPR1                                   | 5                                  | 3                                  | Vesicular protein, communicates signals from cytoplasm to nucleus. | A                              |
| <i>ATP5H</i>                                                                                                                                                                 | ATP synthase subunit d, mitochondrial                      | 5                                  | 3                                  | Intracellular ion transport, mitochondrial                         | -                              |
| <i>ERLIN1</i>                                                                                                                                                                | Erlin-1                                                    | 5                                  | 2                                  | Endoplasmic reticulum protein, cholesterol binding.                | A                              |
| <i>M6PR</i>                                                                                                                                                                  | Cation-dependent mannose-6-phosphate receptor              | 5                                  | 1                                  | Intracellular transport (from Golgi to lysosomes)                  | A                              |
| <i>MOB4</i>                                                                                                                                                                  | MOB-like protein phocein                                   | 5                                  | 3                                  | Intracellular transport                                            | A                              |
| <i>TMX4</i>                                                                                                                                                                  | Thioredoxin-related transmembrane protein 4                | 5                                  | 3                                  | Endoplasmic reticulum, protein folding                             | F                              |
| <i>THOC7</i>                                                                                                                                                                 | THO complex subunit 7 homolog                              | 5                                  | 2                                  | RNA transport and processing                                       | -                              |

|                                                                                                                                                                          |                                                                                                         |   |    |                                                                     |     |
|--------------------------------------------------------------------------------------------------------------------------------------------------------------------------|---------------------------------------------------------------------------------------------------------|---|----|---------------------------------------------------------------------|-----|
| <i>TNC</i>                                                                                                                                                               | Tenascin                                                                                                | 5 | 0  | Cell adhesion, extracellular matrix protein                         | -   |
| <b>Common in the lower brown main cluster 1 (quantified for at least 15 patients in the lower cluster, only three or less patients in the yellow upper main cluster)</b> |                                                                                                         |   |    |                                                                     |     |
| <i>SERPINC1</i>                                                                                                                                                          | Plasma protease C1 inhibitor                                                                            | 3 | 26 | Protease inhibitor, regulates complement and coagulation activation | F/A |
| <i>GAA</i>                                                                                                                                                               | Lysosomal alpha-glucosidase;76 kDa lysosomal alpha-glucosidase;70 kDa lysosomal alpha-glucosidase       | 3 | 24 | Lysosomal protein                                                   | A   |
| <i>MET</i>                                                                                                                                                               | Hepatocyte growth factor receptor                                                                       | 3 | 24 | HGF cell surface receptor (protooncogene)                           | A   |
| <i>POSTN</i>                                                                                                                                                             | Periostin                                                                                               | 3 | 24 | Cell adhesion, extracellular matrix protein                         | A   |
| <i>SPN</i>                                                                                                                                                               | Leukosialin                                                                                             | 3 | 24 | Cell surface glycoprotein                                           | A   |
| <i>DES</i>                                                                                                                                                               | Desmin                                                                                                  | 3 | 24 | Cytoskeleton-microtubules                                           | A   |
| <i>MANBA</i>                                                                                                                                                             | Beta-mannosidase                                                                                        | 3 | 23 | Lysosomal protein                                                   | A   |
| <i>PFDN2</i>                                                                                                                                                             | Prefoldin subunit 2                                                                                     | 3 | 22 | Chaperon                                                            | A   |
| <i>PPP1R2;PPP1R2P3</i>                                                                                                                                                   | Protein phosphatase inhibitor 2;Protein phosphatase inhibitor 2-like protein 3                          | 3 | 22 | Protein phosphatase 1 inhibitor. Cell signaling                     | -   |
| <i>QPCT</i>                                                                                                                                                              | Glutaminyl-peptide cyclotransferase                                                                     | 2 | 22 | Cytosolic acyltransferase                                           | -   |
| <i>SELL</i>                                                                                                                                                              | L-selectin                                                                                              | 2 | 21 | Adhesion molecule, plasma membrane                                  | F/A |
| <i>VCAM1</i>                                                                                                                                                             | Vascular cell adhesion protein 1                                                                        | 3 | 21 | Adhesion molecule, plasma membrane                                  | F   |
| <i>FBN2</i>                                                                                                                                                              | Fibrillin-2                                                                                             | 3 | 20 | Extracellular matrix molecule                                       | A   |
| <i>FNDC1</i>                                                                                                                                                             | Fibronectin type III domain-containing protein 1                                                        | 2 | 20 | Secreted to extracellular matrix                                    | F/A |
| <i>ITGB2</i>                                                                                                                                                             | Integrin beta-2                                                                                         | 3 | 20 | Adhesion molecule, plasma membrane                                  | -   |
| <i>PEA15</i>                                                                                                                                                             | Astrocytic phosphoprotein PEA-15                                                                        | 3 | 20 | Intracellular signaling; integrin and MAP kinase signaling.         | A   |
| <i>AP3D1</i>                                                                                                                                                             | AP-3 complex subunit delta-1                                                                            | 2 | 19 | Intracellular transport, Golgi to lysosomes.                        | F/A |
| <i>C1orf123</i>                                                                                                                                                          | UPF0587 protein C1orf123                                                                                | 3 | 19 | Located to vesicles and mitotic spindles.                           | A   |
| <i>CLIP1</i>                                                                                                                                                             | CAP-Gly domain-containing linker protein 1                                                              | 3 | 19 | Microtubule cytoskeleton, vesicle linking                           | -   |
| <i>COL6A2</i>                                                                                                                                                            | Collagen alpha-2(VI) chain                                                                              | 3 | 19 | Extracellular matrix                                                | F/A |
| <i>ARHGAP4</i>                                                                                                                                                           | Rho GTPase-activating protein 4                                                                         | 3 | 19 | Intracellular signaling, Rho GTPases.                               | A   |
| <i>LOXL3</i>                                                                                                                                                             | Lysyl oxidase homolog 3                                                                                 | 3 | 19 | Lipoxygenase, fatty acid metabolism                                 | A   |
| <i>DDAH1</i>                                                                                                                                                             | N(G),N(G)-dimethylarginine dimethylaminohydrolase 1                                                     | 3 | 18 | Hydrolase, nitric oxide generation.                                 | F   |
| <i>ICAM2</i>                                                                                                                                                             | Intercellular adhesion molecule 2                                                                       | 3 | 18 | Plasma membrane, adhesion molecule                                  | -   |
| <i>NCF1;NCF1B;NCF1C</i>                                                                                                                                                  | Neutrophil cytosol factor 1;Putative neutrophil cytosol factor 1B;Putative neutrophil cytosol factor 1C | 3 | 18 | Oxidase, superoxide production                                      | -   |

|                  |                                                                                            |   |    |                                                                            |     |
|------------------|--------------------------------------------------------------------------------------------|---|----|----------------------------------------------------------------------------|-----|
| <i>PLP2</i>      | Proteolipid protein 2                                                                      | 3 | 18 | Endoplasmic reticulum, ion channel?                                        | A   |
| <i>POSTN</i>     | Periostin                                                                                  | 3 | 18 | Cell adhesion, extracellular matrix protein                                | A   |
| <i>PPT1</i>      | Palmitoyl-protein thioesterase 1                                                           | 2 | 18 | Hydrolase, Golgi-vesicles.                                                 | A   |
| <i>LEPRE1</i>    | Prolyl 3-hydroxylase 1                                                                     | 3 | 18 | Vesicle protein, extracellular matrix modulation                           | A   |
| <i>RPL15</i>     | 60S ribosomal protein L15                                                                  | 3 | 18 | Ribosome                                                                   | -   |
| <i>ANGPTL4</i>   | Angiopoietin-related protein 4                                                             | 3 | 18 | Angioregulatory protein, secreted vesicle protein, triglyceride metabolism | A   |
| <i>ACPI</i>      | Low molecular weight phosphotyrosine protein phosphatase                                   | 3 | 17 | Hydrolase, protein phosphatase                                             | A   |
| <i>BLVRA</i>     | Biliverdin reductase A                                                                     | 3 | 17 | Oxidoreductase                                                             | F   |
| <i>DNPH1</i>     | 2-deoxynucleoside 5-phosphate N-hydrolase 1                                                | 3 | 17 | Nucleotide metabolism                                                      | -   |
| <i>FAM134A</i>   | Protein FAM134A                                                                            | 3 | 17 | Cytosolic                                                                  | A   |
| <i>HBD</i>       | Hemoglobin subunit delta                                                                   | 3 | 17 | Oxygen binding                                                             | -   |
| <i>HDHD1</i>     | Pseudouridine-5-phosphatase                                                                | 3 | 17 | Hydrolase, nucleotide metabolism                                           | F/A |
| <i>LRRC15</i>    | Leucine-rich repeat-containing protein 15                                                  | 3 | 17 |                                                                            |     |
| <i>MAN1B1</i>    | Endoplasmic reticulum mannosyl-oligosaccharide 1,2-alpha-mannosidase                       | 3 | 17 | Endoplasmic reticulum, chaperone regulator                                 | A   |
| <i>PTPN12</i>    | Tyrosine-protein phosphatase non-receptor type 12                                          | 3 | 17 | Protein phosphatase, plasma membrane                                       | A   |
| <i>SRP68</i>     | Signal recognition particle subunit SRP68                                                  | 3 | 17 | Protein targeting to endoplasmic reticulum                                 | F/A |
| <i>COL5A3</i>    | Collagen alpha-3(V) chain                                                                  | 1 | 16 | Extracellular matrix                                                       | A   |
| <i>CXCL8</i>     | Interleukin-8;MDNCF-a;Interleukin-8;IL-8(5-77);IL-8(6-77);IL-8(7-77);IL-8(8-77);IL-8(9-77) | 2 | 16 | Angioregulatory chemokine                                                  | A   |
| <i>ENG</i>       | Endoglin                                                                                   | 1 | 16 | Cell adhesion, cytokine signaling                                          | F/A |
| <i>HIST2H2BE</i> | Histone H2B type 2-E;Histone H2B type 1-B;Histone H2B type 1-O;Histone H2B type 3-B        | 3 | 16 | Nucleosome                                                                 | A   |
| <i>LRMP</i>      | Lymphoid-restricted membrane protein;Processed lymphoid-restricted membrane protein        | 3 | 16 | Endoplasmic reticulum, peptide transport                                   | -   |
| <i>SFN</i>       | 14-3-3 protein sigma                                                                       | 3 | 16 | Intracellular signaling                                                    | F/A |
| <i>TIPRL</i>     | TIP41-like protein                                                                         | 3 | 16 | Vesicular protein, phosphatase regulator                                   | A   |
| <i>VDAC1</i>     | Voltage-dependent anion-selective channel protein 1                                        | 2 | 16 | Plasma and mitochondrial membrane channel                                  | A   |
| <i>VNN1</i>      | Pantetheinase                                                                              | 3 | 16 | Cell surface                                                               | A   |
| <i>VWF</i>       | von Willebrand factor;von Willebrand antigen 2                                             | 3 | 16 | Coagulation, adhesion                                                      | A   |
| <i>ARF4</i>      | ADP-ribosylation factor 4                                                                  | 3 | 15 | Intracellular transport                                                    | A   |

|                    |                                                                                                                                                                                    |   |    |                                                 |     |
|--------------------|------------------------------------------------------------------------------------------------------------------------------------------------------------------------------------|---|----|-------------------------------------------------|-----|
| <i>CD33</i>        | Myeloid cell surface antigen CD33                                                                                                                                                  | 3 | 15 | Cell adhesion                                   | -   |
| <i>CHST11</i>      | Carbohydrate sulfotransferase 11                                                                                                                                                   | 0 | 15 | Sulfate transferase, Golgi                      | A   |
| <i>EIF3E</i>       | Eukaryotic translation initiation factor 3 subunit E                                                                                                                               | 3 | 15 | Protein synthesis                               | A   |
| <i>FKBP15</i>      | FK506-binding protein 15                                                                                                                                                           | 3 | 15 | Actin binding, cytoskeleton                     | A   |
| <i>GART</i>        | Trifunctional purine biosynthetic protein adenosine-3;Phosphoribosylamine--glycine ligase;Phosphoribosylformylglycinamide cyclo-ligase;Phosphoribosylglycinamide formyltransferase | 3 | 15 | Purine biosynthesis                             | A   |
| <i>GSPT1;GSPT2</i> | Eukaryotic peptide chain release factor GTP-binding subunit ERF3A;Eukaryotic peptide chain release factor GTP-binding subunit ERF3B                                                | 3 | 15 | Protein synthesis                               | F/A |
| <i>IK</i>          | Protein Red                                                                                                                                                                        | 2 | 15 | RNA splicing                                    | F/A |
| <i>LAMP1</i>       | Lysosome-associated membrane glycoprotein 1                                                                                                                                        | 3 | 15 | Cell membrane glycoprotein, selectin modulation | F   |
| <i>NEK9</i>        | Serine/threonine-protein kinase Nek9                                                                                                                                               | 3 | 15 | Kinase, cell cycle regulation                   | F   |
| <i>PARVG</i>       | Gamma-parvin                                                                                                                                                                       | 3 | 15 | Cell adhesion, cytoskeleton                     | F/A |
| <i>PROSC</i>       | Proline synthase co-transcribed bacterial homolog protein                                                                                                                          | 2 | 15 |                                                 | -   |
| <i>RPL14</i>       | 60S ribosomal protein L14                                                                                                                                                          | 3 | 15 | Ribosome                                        | -   |
| <i>TFPI</i>        | Tissue factor pathway inhibitor                                                                                                                                                    | 3 | 15 | Coagulation, protease inhibitor                 | A   |
| <i>MMP10</i>       | Stromelysin-2                                                                                                                                                                      | 3 | 15 | Protease, collagen degradation                  | F   |

**Table S5.** Proteomic analysis of the extracellular AML cell secretome; a comparison of the two main clusters identified in Figure 2 in the article. This table presents a more detailed classification of the 44 proteins from Table S4 that are involved in cellular communication and intracellular organelles/trafficking/transport. The gene names are used for identification of proteins; underlined names refer to proteins increased in the upper yellow main patient cluster (including 10 patients) whereas the other proteins are increased in the lower brown main patient cluster (31 patients). The classification is based on the Protein Atlas database ([The Human Protein Atlas](#) accessed 29.07.2021).

|                                             |                                                                                                                                 |
|---------------------------------------------|---------------------------------------------------------------------------------------------------------------------------------|
| <b>CELLULAR COMMUNICATION</b>               |                                                                                                                                 |
|                                             | <b>Cell surface/plasma membrane molecules:</b> MET, SPN, SELL, VCAM1, PTPN12, VNN1                                              |
|                                             | <b>Cell adhesion:</b> <u>TNC</u> , POSTN, SELL, VCAM1, ICAM2, COL5A, ENG, VWF, CD33,                                            |
|                                             | <b>Extracellular matrix (including matrix modulators):</b> <u>TNC</u> , POSTN, FBN2, FNDC1, ITGB2, COL6A2, LEPRE1, LAMP1, MMP10 |
|                                             | <b>Other proteins involved in cellular communication:</b> ANGPTL4, CXCL8, VWF                                                   |
| <b>INTRACELLULAR TRANSPORT/TRAFFICKING:</b> |                                                                                                                                 |
|                                             | <b>Vesicular proteins:</b> <u>UNC13D</u> , C1orf123, PPT1, LEPRE1, TIPRL                                                        |
|                                             | <b>Endoplasmic reticulum:</b> <u>ERLIN1</u> , <u>TMX4</u> , PLP2, MAN1B1, SRP68, SRP68, LNRP                                    |
|                                             | <b>Golgi:</b> CHST11                                                                                                            |
|                                             | <b>Lysosomes:</b> GAA, MANBA,                                                                                                   |
|                                             | <b>Cytoskeleton:</b> DES, CLIP1, FKBP15, PARVG                                                                                  |
|                                             | <b>Intracellular transport:</b> <u>M6PR</u> , <u>MOB4</u> , <u>THOC7</u> , AP3D1, ARF4                                          |

**Table S6.** Proteins detected only in MSCs cultured with AML-conditioned medium (i.e. AML induced MSC proteins) but not in control MSCs cultured in medium alone. The table shows the MSC proteins detected for AML conditioned medium derived from at least 30 of the 41 patients, and for each protein we give the gene name together with the number of patient samples resulting in detectable levels in parenthesis, a short description of the protein and key words. The information is based on the Gene database, selected references from the PubMed database ([PubMed \(nih.gov\)](https://pubmed.ncbi.nlm.nih.gov/) accessed 29.07.21) and the Human Protein Atlas ([The Human Protein Atlas](https://www.proteinatlas.org/) accessed 29.07.2021).

| Gene<br>(number of<br>patients) | Description                                                                                                                                                                                                                                                                                                                                                                                                                                                                                            | Key words                                       |
|---------------------------------|--------------------------------------------------------------------------------------------------------------------------------------------------------------------------------------------------------------------------------------------------------------------------------------------------------------------------------------------------------------------------------------------------------------------------------------------------------------------------------------------------------|-------------------------------------------------|
| <i>VAV1</i><br>(40)             | <i>Vav guanine nucleotide exchange factor 1</i> . This protein is a member of the VAV gene family, a family of guanine nucleotide exchange factors (GEFs) for Rho family GTPases that activate pathways leading to actin cytoskeletal rearrangements and transcriptional alterations. The encoded protein is important in hematopoiesis.                                                                                                                                                               | Rho family<br>Cytoskeleton<br>Transcription     |
| <i>BIN2</i><br>(40)             | <i>Bridging integrator 2</i> . The protein has a broad expression in the bone marrow and is associated with actin-rich structures of the plasma membrane; it is involved in cell migration and possibly intracellular transport/endocytosis (PMID 23285027). The Stem Cell Factor (SCF) maintains stemness of MSCs by maintaining mitochondrial functions (PMID 32736659); this effect is mediated through various pathways and BIN2 is one of the downstream target of SCF signaling (PMID 23185384). | Actin<br>Intracellular<br>transport<br>Stemness |
| <i>NBEAL2</i><br>(39)           | <i>Neurobeachin-like protein 2</i> . The protein contains a beige and Chediak-Higashi (BEACH) domain and multiple WD40 domains, and may play a role in megakaryocyte alpha-granule biogenesis. The gene shows only low expression in various mesenchymal cells ( <a href="#">Cell atlas - NBEAL2 - The Human Protein Atlas</a> )                                                                                                                                                                       | Granule<br>formation                            |
| <i>TLR2</i><br>(38)             | <i>Toll-like receptor 2</i> . The protein is a member of the Toll-like receptor (TLR) family. TLR2 is a cell-surface protein that can form heterodimers with other TLR family members to recognize conserved exogenous or endogenous ligands. Activation of TLRs leads to an up-regulation of signaling pathways including NFκB.                                                                                                                                                                       | NFκB                                            |
| <i>GZMK</i><br>(38)             | <i>Granzyme K</i> . This protein is a member of a group of related serine proteases from the cytoplasmic granules of cytotoxic cells. The protein described here lacks consensus sequences for N-glycosylation present in other granzymes. Low expression has previously been detected in a sarcoma cell line ( <a href="#">Cell atlas - GZMK - The Human Protein Atlas</a> ).                                                                                                                         | Protease                                        |
| <i>CD84</i><br>(38)             | <i>CD84 molecule</i> . The encoded membrane glycoprotein is a member of the signaling lymphocyte activation molecule (SLAM) family. The encoded protein is a homophilic adhesion molecule that is involved in regulating receptor-mediated signaling. The protein is expressed in a wide range of organs, but with very low or absent expression in normal mesenchymal cells ( <a href="#">Cell type atlas - CD84 - The Human Protein Atlas</a> )                                                      | Adhesion<br>Signal<br>transduction              |
| <i>UNC13D</i><br>(37)           | <i>Unc-13 homolog</i> . This protein is a member of the UNC13 family, containing similar domain structure as other family members but lacking an N-terminal phorbol ester-binding C1 domain present in other Munc13 proteins. The protein appears to play a role in vesicle maturation during exocytosis.                                                                                                                                                                                              | Vesicle<br>maturation<br>Exocytosis             |
| <i>CFD</i><br>(37)              | <i>Complement factor D</i> . This gene encodes a member of the chymotrypsin family of serine peptidases. This protease catalyzes the cleavage of factor B, the rate-limiting step of the alternative pathway of complement activation. This protein also functions as a cell-signaling adipokine. The protein can be released by fibroblasts and functions as a modulator of the extracellular matrix (PMID 31026383).                                                                                 | Protease<br>Extracellular<br>matrix             |
| <i>ELMO1</i><br>(37)            | <i>Engulfment and cell motility protein 1</i> . This gene encodes a member of the engulfment and cell motility protein family. These proteins interact with mediator of cytokinesis proteins to promote phagocytosis and cell migration. The protein can be expressed at low levels in                                                                                                                                                                                                                 | Phagocytosis                                    |

|                    |                                                                                                                                                                                                                                                                                                                                                                                                                                                                                                                                                                                                                                   |                                        |
|--------------------|-----------------------------------------------------------------------------------------------------------------------------------------------------------------------------------------------------------------------------------------------------------------------------------------------------------------------------------------------------------------------------------------------------------------------------------------------------------------------------------------------------------------------------------------------------------------------------------------------------------------------------------|----------------------------------------|
|                    | mesenchymal cells ( <a href="#">Cell atlas - ELMO1 - The Human Protein Atlas</a> ).                                                                                                                                                                                                                                                                                                                                                                                                                                                                                                                                               |                                        |
| GP9<br>(37)        | <i>Platelet glycoprotein IX</i> . This gene encodes a small membrane glycoprotein. It forms a 1-to-1 noncovalent complex with glycoprotein Ib, a platelet surface membrane glycoprotein complex that functions as a receptor for von Willebrand factor.                                                                                                                                                                                                                                                                                                                                                                           | Cell membrane glycoprotein             |
| IRAK3<br>(37)      | <i>Interleukin-1 receptor-associated kinase 3</i> . The encoded protein is a member of the interleukin-1 receptor-associated kinase protein family. Members of this family are essential components of the Toll/IL-R immune signal transduction pathways. It functions as a regulator of Toll-like receptor signaling.                                                                                                                                                                                                                                                                                                            | IL1 receptor<br>TLR                    |
| LYN<br>(36)        | <i>Tyrosine-protein kinase Lyn</i> . This gene encodes a tyrosine protein kinase that may be involved in the regulation of mast cell degranulation and erythroid differentiation.                                                                                                                                                                                                                                                                                                                                                                                                                                                 | Tyrosine kinase<br>Degranulation       |
| ICAM3<br>(36)      | <i>Intercellular adhesion molecule 3</i> . The protein encoded by this gene is a member of the intercellular adhesion molecule (ICAM) family of transmembrane glycoproteins that bind to the leukocyte adhesion LFA-1 protein. It functions not only as an adhesion molecule, but also as a potent signaling molecule.                                                                                                                                                                                                                                                                                                            | Adhesion<br>Signaling                  |
| HLA-DRB1<br>(35)   | HLA class II histocompatibility antigen, DRB1 beta chain.                                                                                                                                                                                                                                                                                                                                                                                                                                                                                                                                                                         | HLA molecule                           |
| CXCL7/PPBP<br>(35) | <i>CXCL7 (Platelet basic protein)</i> . The protein encoded by this gene is a platelet-derived growth factor that belongs to the CXC chemokine family. This growth factor is a potent chemoattractant and activator of neutrophils. It has been shown to stimulate various cellular processes including DNA synthesis, mitosis, glycolysis, intracellular cAMP accumulation, prostaglandin E2 secretion, and synthesis of hyaluronic acid and sulfated glycosaminoglycan. It binds to G-protein coupled receptors that also can be expressed by MSCs and autocrine stimulation may thereby be possible (PMID 18793669, 33865426). | Chemokine<br>G protein<br>Autocrine    |
| AGTPBP1<br>(35)    | <i>Cytosolic carboxypeptidase 1</i> . NNA1 is a zinc carboxypeptidase that contains nuclear localization signals and an ATP/GTP-binding motif. The protein can be expressed by various mesenchymal cells ( <a href="#">Cell atlas - AGTPBP1 - The Human Protein Atlas</a> )                                                                                                                                                                                                                                                                                                                                                       | ATP/GTP                                |
| RAB37<br>(34)      | <i>Ras-related protein Rab-37</i> . Rab proteins are low molecular mass GTPases that are critical regulators of vesicle trafficking. For additional background information on Rab proteins, see MIM 179508                                                                                                                                                                                                                                                                                                                                                                                                                        | GTPase<br>Vesicle trafficking          |
| DEFA1<br>(34)      | <i>Neutrophil defensin 1</i> . Defensins are expressed in different tissues. Defensin, alpha 1 plays a role in phagocyte-mediated host defense. This protein is also a part of the MSC extracellular vesicle proteome (PMID 30378105).                                                                                                                                                                                                                                                                                                                                                                                            | Phagocytosis<br>MSC vesicles           |
| PLCB2<br>(34)      | <i>1-phosphatidylinositol 4,5-bisphosphate phosphodiesterase beta-2</i> . The protein is a phosphodiesterase that catalyzes the hydrolysis of phosphatidylinositol 4,5-bisphosphate to the second messengers inositol 1,4,5-trisphosphate (IP3) and diacylglycerol. The encoded protein is activated by G proteins (i.e. a GTP binding protein). NFκB regulates the transcription of this gene.                                                                                                                                                                                                                                   | Phosphodiesterase<br>G protein<br>NFκB |
| ARHGAP25<br>(33)   | <i>Isoform 4 of Rho GTPase-activating protein 25</i> . ARHGAPs, such as ARHGAP25, encode negative regulators of Rho GTPases that are implicated in actin remodeling, cell polarity, and cell migration (PubMed 15254788). It is regarded as a Rac GTPase activating protein (PMID 27566826), and the RhoE/ROCK/ARHGAP25 signaling pathway is regarded as a Rac regulator (PMID 27413008). Rac/Rho GTPases are important regulators of microtubule organization and intracellular vesicular transport (PMID 25054920, 31358621).                                                                                                   | Rho GTPase<br>Vesicle trafficking      |
| ARHGAP45<br>(33)   | <i>Rho GTPase-activating protein 45</i> . ArhGAP45 acts as a Rac-GAP (GTPase-Activating Protein) (PMID 29174013).                                                                                                                                                                                                                                                                                                                                                                                                                                                                                                                 | Rho GTPase<br>Vesicle trafficking      |
| GIMAP8<br>(33)     | <i>GTPase IMAP family member 8</i> . This gene encodes a protein belonging to the GTP-binding superfamily and to the immuno-associated nucleotide (IAN) subfamily of nucleotide-binding proteins.                                                                                                                                                                                                                                                                                                                                                                                                                                 | GTPase                                 |
| BTNL8<br>(33)      | <i>Butyrophilin-like protein 8</i> . The protein is predicted to be a membrane protein ( <a href="#">Cell atlas - BTNL8 - The Human Protein Atlas</a> ).                                                                                                                                                                                                                                                                                                                                                                                                                                                                          |                                        |

|                         |                                                                                                                                                                                                                                                                                                                                                                                                                                                                                                                                                                                                          |                                                   |
|-------------------------|----------------------------------------------------------------------------------------------------------------------------------------------------------------------------------------------------------------------------------------------------------------------------------------------------------------------------------------------------------------------------------------------------------------------------------------------------------------------------------------------------------------------------------------------------------------------------------------------------------|---------------------------------------------------|
| <i>SASH3</i><br>(32)    | <i>SAM and SH3 domain-containing protein 3</i> . The protein has a Src homology-3 (SH3) domain and a sterile alpha motif (SAM), both of which are found in proteins involved in cell signaling.                                                                                                                                                                                                                                                                                                                                                                                                          | Cell signaling?                                   |
| <i>ARHGAP15</i><br>(31) | Rho GTPase-activating protein 15. RHO GTPases regulate diverse biologic processes, and their activity is regulated by RHO GTPase-activating proteins (GAPs), such as ARHGAP15 (PubMed 12650940). The protein shows nucleotide-independent Rac1 binding and induces actin remodeling.                                                                                                                                                                                                                                                                                                                     | Rho GTPase<br>Vesicle trafficking<br>Actin        |
| <i>CD36</i><br>(30)     | <i>Platelet glycoprotein 4</i> . The protein serves as a receptor for thrombospondin and functions as a cell adhesion molecule. It binds to collagen, thrombospondin, anionic phospholipids and oxidized LDL. It binds long chain fatty acids and may function in the transport and/or as a regulator of fatty acid transport. CD36 shows a vesicle-mediated reversible trafficking (recycling) between intracellular membrane compartments and the cell surface (PMID 27615427). Thrombospondin is also important for stem cell maintenance and extracellular <b>vesicle</b> functions (PMID 33925464), | Adhesion<br>Thrombospondin<br>Vesicle<br>Stemness |
| <i>GIMAP1</i><br>(30)   | <i>GTPase IMAP family member 1</i> . This protein belongs to the GTP-binding superfamily and to the immuno-associated nucleotide (IAN) subfamily of nucleotide-binding proteins.                                                                                                                                                                                                                                                                                                                                                                                                                         | GTP binding                                       |
| <i>APOBEC3F</i><br>(30) | <i>Apolipoprotein B mRNA editing enzyme catalytic subunit 3F</i> . This gene is a member of the cytidine deaminase gene family. Members of the cluster encode proteins that are structurally and functionally related to the C to U RNA-editing cytidine deaminase APOBEC1. It is thought that the proteins may be RNA editing enzymes and have roles in growth or cell cycle control.                                                                                                                                                                                                                   | RNA<br>Growth control                             |
| <i>DOK2</i><br>(30)     | <i>Docking protein 2</i> . Downstream of kinase (Dok)-related protein (DokR is implicated in cytokine signaling, and tyrosine phosphorylation induces DokR to bind the signal relay molecule RasGTPase-activating protein (RasGAP).                                                                                                                                                                                                                                                                                                                                                                      | GTPase                                            |
| <i>NSMCE3</i><br>(30)   | <i>NSE3 homolog, SMC5-SMC6 complex component</i> . The protein encoded by this gene is part of the SMC5-6 chromatin reorganizing complex and is a member of the MAGE superfamily.                                                                                                                                                                                                                                                                                                                                                                                                                        | Chromatin                                         |



**Table S7.** The number of AML-induced MSC proteins for individual leukemia patients. We identified 301 proteins that could be quantified only when MSCs had been cultured with AML conditioned medium (CM). The table presents the number of such AML induced proteins detected for each individual patient. The 10 samples belonging to the upper yellow samples cluster identified in Figure 2 in the article are marked with yellow (patients 1-10). The patients are numbered according to Table S1.

| Culture condition | Number of proteins |
|-------------------|--------------------|
| MSC+P8-CM         | 174                |
| MSC+P4-CM         | 149                |
| MSC+P10-CM        | 149                |
| MSC+P3-CM         | 147                |
| MSC+P9-CM         | 145                |
| MSC+P32-CM        | 131                |
| MSC+P39-CM        | 123                |
| MSC+P41-CM        | 123                |
| MSC+P2-CM         | 110                |
| MSC+P1-CM         | 106                |
| MSC+P6-CM         | 106                |
| MSC+P36-CM        | 105                |
| MSC+P28-CM        | 104                |
| MSC+P40-CM        | 102                |
| MSC+P16-CM        | 98                 |
| MSC+P22-CM        | 98                 |
| MSC+P38-CM        | 98                 |
| MSC+P30-CM        | 95                 |
| MSC+P18-CM        | 90                 |
| MSC+P31-CM        | 90                 |
| MSC+P7-CM         | 90                 |
| MSC+P13-CM        | 88                 |
| MSC+P37-CM        | 85                 |
| MSC+P19-CM        | 83                 |
| MSC+P11-CM        | 81                 |
| MSC+P17-CM        | 81                 |
| MSC+P5-CM         | 78                 |
| MSC+P25-CM        | 77                 |
| MSC+P12-CM        | 75                 |
| MSC+P26-CM        | 70                 |
| MSC+P21-CM        | 67                 |
| MSC+P35-CM        | 67                 |
| MSC+P34-CM        | 67                 |
| MSC+P14-CM        | 66                 |
| MSC+P29-CM        | 64                 |
| MSC+P33-CM        | 60                 |
| MSC+P27-CM        | 50                 |
| MSC+P23-CM        | 48                 |
| MSC+P15-CM        | 47                 |
| MSC+P20-CM        | 42                 |
| MSC+P24-CM        | 34                 |

**Table S8.** Protein enrichment classification of MSC proteins that are quantified both for MSCs cultured with AML conditioned medium and in MSC medium controls (at least three of the four controls), but showing significant differences in protein abundance between these two MSC groups. All identified proteins could be quantified for at least 24 of the 41 MSC samples that had been exposed to AML conditioned medium. The proteins were classified using a GO tool. The most significant general GO terms are listed together with foreground and background counts, s- and p-values and the false discovery rate.

| Term                  | Description                              | Category | Fore-ground count | Back-ground count | s-value | p-value                | FDR     |
|-----------------------|------------------------------------------|----------|-------------------|-------------------|---------|------------------------|---------|
| <b>UPREGULATED</b>    |                                          |          |                   |                   |         |                        |         |
| GO:0031410            | Cytoplasmic vesicle                      | CC       | 56                | 1380              | 1.07    | $1.69 \times 10^{-06}$ | 0.00469 |
| GO:0005615            | Extracellular space                      | CC       | 60                | 1655              | 0.92    | $4.84 \times 10^{-06}$ | 0.00671 |
| GO:0005576            | Extracellular region                     | CC       | 65                | 1884              | 0.89    | $7.91 \times 10^{-06}$ | 0.00731 |
| GOCC:0031982          | Vesicle                                  | CC-TM    | 56                | 1388              | 1.05    | $1.86 \times 10^{-06}$ | 0.00104 |
| GOCC:0030141          | Secretory granule                        | CC-TM    | 35                | 497               | 1.03    | $7.10 \times 10^{-07}$ | 0.00104 |
| GOCC:0099503          | Secretory vesicle                        | CC-TM    | 35                | 523               | 1.02    | $5.90 \times 10^{-07}$ | 0.00104 |
| GOCC:0031410          | Cytoplasmic vesicle                      | CC-TM    | 49                | 1167              | 0.92    | $3.21 \times 10^{-06}$ | 0.00104 |
| GOCC:0031224          | Intrinsic component of membrane          | CC-TM    | 34                | 599               | 0.88    | $9.13 \times 10^{-07}$ | 0.00104 |
| GOCC:0005615          | Extracellular space                      | CC-TM    | 32                | 516               | 0.85    | $1.31 \times 10^{-06}$ | 0.00104 |
| GOCC:0016021          | Integral component of membrane           | CC-TM    | 31                | 522               | 0.79    | $1.58 \times 10^{-06}$ | 0.00104 |
| GOCC:0005576          | Extracellular region                     | CC-TM    | 39                | 880               | 0.72    | $7.27 \times 10^{-06}$ | 0.00178 |
| <b>DOWN-REGULATED</b> |                                          |          |                   |                   |         |                        |         |
| GO:0030198            | Extracellular matrix organization        | BP       | 17                | 202               | 1.87    | $4.03 \times 10^{-07}$ | 0.00802 |
| GO:0030312            | External encapsulating structure         | CC       | 16                | 228               | 1.85    | $1.38 \times 10^{-07}$ | 0.00038 |
| GO:0031012            | Extracellular matrix                     | CC       | 16                | 228               | 1.85    | $1.38 \times 10^{-07}$ | 0.00038 |
| GOCC:0005576          | Extracellular region                     | CC-TM    | 22                | 880               | 1.82    | $5.67 \times 10^{-07}$ | 0.00111 |
| GOCC:0031012          | Extracellular matrix                     | CC-TM    | 14                | 355               | 1.41    | $2.65 \times 10^{-07}$ | 0.00104 |
| GOCC:0062023          | Collagen-containing extracellular matrix | CC-TM    | 8                 | 103               | 0.81    | $1.25 \times 10^{-06}$ | 0.00163 |

S-value is a combination of (minus log) p-value and effect size (i.e. positive associations in the foreground divided by all associations); a positive value indicates overrepresentation of a given term, and a negative value indicates underrepresentation of a given term. Foreground counts indicate the number of positive associations for a given term (i.e. the number of proteins associated with the given term) and background counts indicate the number of positive association in the dataset.

Abbreviations: BP, GO biological process; CC, GO Cellular component TextMining; FDR, false discovery rate.

**Table S9.** Classification of MSC proteins that are quantified both for MSCs cultured with AML conditioned medium (at least 24 AML-affected MSC samples showing detectable levels) and in MSC medium controls (at least three of the four controls), but showing significant differences in protein abundance between these two MSC groups. The table presents the results for the four networks/subclusters presented in Figure 5. The proteins were classified using a GO tool. The most significant general GO terms and/or KEGG pathways are listed together with foreground and background counts, s- and p-values and the false discovery rate.

| Term                     | Description                   | Category | Foreground count | Background count | s-value | p-value                | FDR                    |
|--------------------------|-------------------------------|----------|------------------|------------------|---------|------------------------|------------------------|
| <b>CLUSTER/NETWORK 1</b> |                               |          |                  |                  |         |                        |                        |
| GOCC:003014<br>1         | Secretory granule             | CC-TM    | 27               | 497              | 6.41    | $1.30 \times 10^{-07}$ | 0.00022                |
| GOCC:000561<br>5         | Extracellular space           | CC-TM    | 16               | 516              | 3.54    | $1.54 \times 10^{-07}$ | 0.00022                |
| GOCC:004258<br>1         | Specific granule              | CC-TM    | 16               | 132              | 3.48    | $8.76 \times 10^{-07}$ | 0.00022                |
| GO:0016192               | Vesicle-mediated transport    | BP       | 27               | 1226             | 5.60    | $1.75 \times 10^{-07}$ | 0.00324                |
| GO:0002376               | Immune system process         | BP       | 27               | 1287             | 5.28    | $1.75 \times 10^{-07}$ | 0.00324                |
| <b>CLUSTER/NETWORK 2</b> |                               |          |                  |                  |         |                        |                        |
| map04514                 | Cell adhesion molecules       | KEGG     | 6                | 57               | 5.71    | $1.89 \times 10^{-07}$ | $1.37 \times 10^{-05}$ |
| <b>CLUSTER/NETWORK 3</b> |                               |          |                  |                  |         |                        |                        |
| map03030                 | DNA replication               | KEGG     | 5                | 29               | 5.98    | $9.80 \times 10^{-07}$ | 0.00021                |
| map04110                 | Cell cycle                    | KEGG     | 4                | 65               | 5.85    | $3.96 \times 10^{-08}$ | $1.73 \times 10^{-05}$ |
| <b>CLUSTER/NETWORK 4</b> |                               |          |                  |                  |         |                        |                        |
| GOCC:003109<br>3         | Platelet alpha granule lumen  | CC-TM    | 4                | 49               | 3.32    | $1.85 \times 10^{-07}$ | 0.00073                |
| GOCC:007001<br>3         | Intracellular organelle lumen | CC-TM    | 8                | 2208             | 2.81    | $8.50 \times 10^{-05}$ | 0.039                  |
| GOCC:000557<br>6         | Extracellular region          | CC-TM    | 6                | 880              | 2.57    | $8.03 \times 10^{-05}$ | 0.039                  |

S-value is a combination of (minus log) p value and effect size (i.e. positive associations in the foreground divided by all associations); a positive value indicates overrepresentation of a given term, and a negative value indicates underrepresentation of a given term. Foreground counts indicate the number of positive associations for a given term (i.e. the number of proteins associated with the given term) and background counts indicate the number of positive association in the dataset.

Abbreviations: BP, GO biological process; CC-TM, GO Cellular component TextMining; FDR, false discovery rate; KEGG, KEGG pathway.

**Table S10.** Proteins quantified in control MSCs but only in 10 or less of the 41 MSC samples exposed to AML conditioned medium. The 27 individual proteins listed in the table were quantified either in at least three of the four MSC control samples (the three upper proteins, indicated by blue color) or in at least one control MSC sample (the 24 other proteins, indicated by green color). The table presents the identity of the protein (i.e. the gene name, the number of AML exposed MSCs with quantifiable level is indicated in parenthesis), a brief description of the protein is given together with key words reflecting important functions. The description is based on the Human Protein Atlas ([The Human Protein Atlas](#) accessed 05.10.2021).

| Gene Symbol   | Description                                                                                                                                                                                                                                                                                                                                                                                                                                                                                                                                                                 | Key words                                                             |
|---------------|-----------------------------------------------------------------------------------------------------------------------------------------------------------------------------------------------------------------------------------------------------------------------------------------------------------------------------------------------------------------------------------------------------------------------------------------------------------------------------------------------------------------------------------------------------------------------------|-----------------------------------------------------------------------|
| KTN1 (5)      | <i>Kinctin 1</i> . This gene encodes an integral membrane protein that is a member of the kinectin protein family. The encoded protein is primarily localized to the endoplasmic reticulum membrane. This protein binds kinesin and may be involved in intracellular organelle motility. This protein also binds translation elongation factor-delta and may be involved in the assembly of the elongation factor-1 complex.                                                                                                                                                | Endoplasmic reticulum<br>Intracellular transport<br>Protein synthesis |
| EIF1B (8)     | <i>Eukaryotic translation initiation factor 1B</i> . The protein is probably involved in translation and protein synthesis.                                                                                                                                                                                                                                                                                                                                                                                                                                                 | Protein synthesis                                                     |
| COL6A3 (9)    | <i>Collagen type VI alpha 3 chain</i> . The encoded protein is found in most connective tissues. The alpha-3 chain of type VI collagen is much larger than the alpha-1 and -2 chains. This difference in size is largely due to an increase in the number of subdomains, similar to von Willebrand Factor type A domains, which are found in the amino terminal globular domain of all the alpha chains. These domains have been shown to bind extracellular matrix proteins, an interaction that explains the importance of this collagen in organizing matrix components. | Extracellular matrix                                                  |
| CAMKK2 (2)    | <i>Calcium/calmodulin-dependent protein kinase 2</i> . The encoded protein belongs to the Serine/Threonine protein kinase family, and to the Ca <sup>++</sup> /calmodulin-dependent protein kinase subfamily. The major isoform of this gene plays a role in the calcium/calmodulin-dependent (CaM) kinase cascade by phosphorylating the downstream kinases CaMK1 and CaMK4. Protein products of this gene also phosphorylate AMP-activated protein kinase (AMPK).                                                                                                         | Ser/Thr protein kinase                                                |
| POSTN (3)     | <i>Periostin</i> . This gene encodes a secreted extracellular matrix protein that binds to integrins to support adhesion and migration of cells. This protein plays a role in cancer stem cell maintenance and metastasis.                                                                                                                                                                                                                                                                                                                                                  | Extracellular matrix<br>Adhesion, migration                           |
| KPRP (5)      | <i>Keratinocyte proline-rich protein</i> . The gene encodes an intracellular protein.                                                                                                                                                                                                                                                                                                                                                                                                                                                                                       |                                                                       |
| BUD13 (5)     | <i>BUD13 homolog</i> . The encoded nucleoplasmic protein is involved in mRNA processing and splicing.                                                                                                                                                                                                                                                                                                                                                                                                                                                                       | RNA processing                                                        |
| CHIT1 (5)     | <i>Chitotriosidase-1/chitinase-1</i> . This secreted protein is involved in carbohydrate metabolism and polysaccharide degradation.                                                                                                                                                                                                                                                                                                                                                                                                                                         | Polysaccharide degradation                                            |
| PIP (5)       | <i>Prolactin-inducible protein</i> . This gene encodes a secreted actin-binding protein.                                                                                                                                                                                                                                                                                                                                                                                                                                                                                    | Actin                                                                 |
| SERPINB12 (5) | <i>Serpin B12 (serpin family B member 12)</i> . The encoded protein is a serine proteinase inhibitor.                                                                                                                                                                                                                                                                                                                                                                                                                                                                       | Protease inhibitor                                                    |
| ERCC6L (6)    | <i>DNA excision repair protein ERCC-6-like</i> . The protein is a member of the SWItch/Sucrose Non-Fermentable (SWI/SNF2) family of proteins, and during interphase the protein is excluded from the nucleus, and only associates with chromatin after the nuclear envelope has broken down. This protein is a DNA translocase that is thought to bind double-stranded DNA. The protein also associates with ribosomal DNA and ultra-fine DNA bridges (UFBs), fine structures that connect sister chromatids during                                                         | DNA translocase                                                       |

|               |                                                                                                                                                                                                                                                                                                                                                                                                           |                                        |
|---------------|-----------------------------------------------------------------------------------------------------------------------------------------------------------------------------------------------------------------------------------------------------------------------------------------------------------------------------------------------------------------------------------------------------------|----------------------------------------|
|               | anaphase.                                                                                                                                                                                                                                                                                                                                                                                                 |                                        |
| FOLR3 (6)     | <i>Folate receptor gamma</i> . This gene encodes a member of the folate receptor family of proteins, which have a high affinity for folic acid and for several reduced folic acid derivatives. It mediates delivery of 5-methyltetrahydrofolate to the interior of cells.                                                                                                                                 | Folic acid                             |
| MBD1 (6)      | <i>Methyl-CpG-binding domain protein 1</i> . The protein is a DNA binding transcriptional regulator.                                                                                                                                                                                                                                                                                                      | DNA binding                            |
| MCC (7)       | <i>Colorectal mutant cancer protein</i> . This intracellular protein is involved in Wnt signaling.                                                                                                                                                                                                                                                                                                        | Wnt signaling                          |
| ACOX1 (7)     | <i>Acyl-coenzyme A oxidase 1</i> . The protein is the first enzyme of the fatty acid beta-oxidation pathway, which catalyzes the desaturation of acyl-CoAs to 2-trans-enoyl-CoAs. It donates electrons directly to molecular oxygen, thereby producing hydrogen peroxide.                                                                                                                                 | Fatty acid metabolism                  |
| S100P (7)     | <i>Protein S100-P</i> . The protein is a member of the S100 family of proteins containing 2 EF-hand calcium-binding motifs. S100 proteins are localized in the cytoplasm and/or nucleus and are involved in a number of cellular processes such as cell cycle progression and differentiation. This protein, in addition to binding Ca <sup>2+</sup> , also binds Zn <sup>2+</sup> and Mg <sup>2+</sup> . | Cell cycle regulation                  |
| MINDY1 (7)    | <i>Ubiquitin carboxyl-terminal hydrolase MINDY-1</i> . This hydrolase can remove 'Lys-48'-linked conjugated ubiquitin from proteins. It has exodeubiquitinase activity and has a preference for long polyubiquitin chains, and it may then be a regulator of protein turnover.                                                                                                                            | Proteostasis                           |
| FSD1 (8)      | <i>Fibronectin type III and SPRY domain-containing protein 1</i> . The protein is probably involved in microtubule organization and stabilization.                                                                                                                                                                                                                                                        | Microtubule                            |
| LRRC1 (8)     | <i>Leucine-rich repeat-containing protein 1</i> . This is a cytosolic protein.                                                                                                                                                                                                                                                                                                                            | Cytosol                                |
| SENPI (8)     | <i>Sentrin-specific protease 1</i> . The encoded cysteine protease specifically targets members of the small ubiquitin-like modifier (SUMO) protein family. This protease regulates SUMO pathways by deconjugating sumoylated proteins. This protease also functions to process the precursor SUMO proteins into their mature form.                                                                       | Sumoylation                            |
| CEP55 (8)     | <i>Centrosomal protein of 55</i> . Intracellular protein involved in cell cycle regulation.                                                                                                                                                                                                                                                                                                               | Cell cycle regulation                  |
| ODAPH (8)     | <i>Odontogenesis associated phosphoprotein</i> . The gene encodes an extracellular matrix acidic phosphoprotein.                                                                                                                                                                                                                                                                                          | Extracellular matrix                   |
| ZNF22 (8)     | <i>Zinc finger protein 22</i> . This DNA binding protein is involved in transcriptional regulation.                                                                                                                                                                                                                                                                                                       | Transcription                          |
| TTC26 (9)     | <i>Intraflagellar transport protein 56</i> . The protein is a component of the intraflagellar transport (IFT) complex B required for transport of proteins; the protein is involved in microtubule organization.                                                                                                                                                                                          | Intracellular transport<br>Microtubule |
| TXNDC11 (9)   | <i>Thioredoxin domain-containing protein 11</i> . The protein possibly acts as a redox regulator involved in DUOX proteins folding.                                                                                                                                                                                                                                                                       | Proteostasis?                          |
| HSP90AB3P (9) | <i>Putative heat shock protein HSP 90-beta-3</i> .                                                                                                                                                                                                                                                                                                                                                        |                                        |
| RNLS (9)      | <i>Renalase</i> . The protein catalyzes the oxidation of the less abundant 1,2-dihydro-beta-NAD(P) and 1,6-dihydro-beta-NAD(P) to form beta-NAD(P)(+). The enzyme hormone is secreted                                                                                                                                                                                                                     | Oxidoreductase.                        |

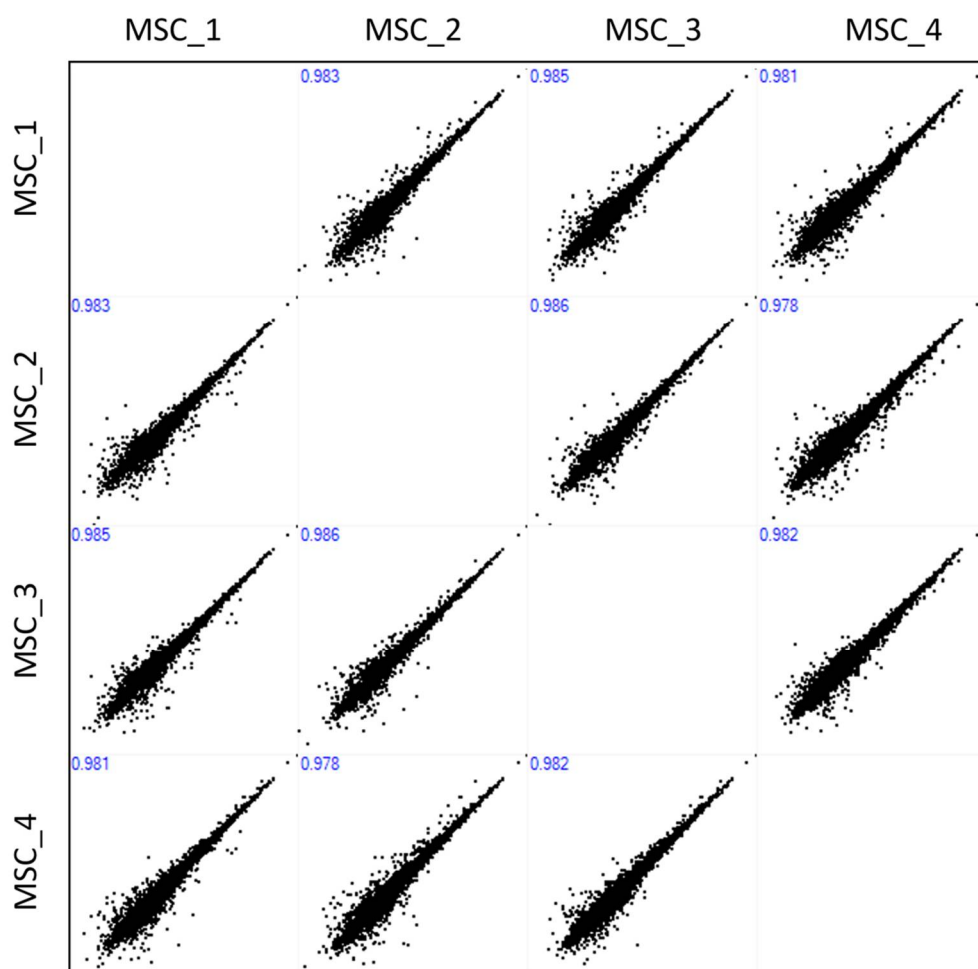

**Figure S1.** Correlation of the proteomic MSC profile; a detailed presentation of the results for the four MSC medium controls, i.e. MSC cultures prepared in medium alone in four independent cultures. The Pearson R correlation coefficient is indicated for each correlation analysis.

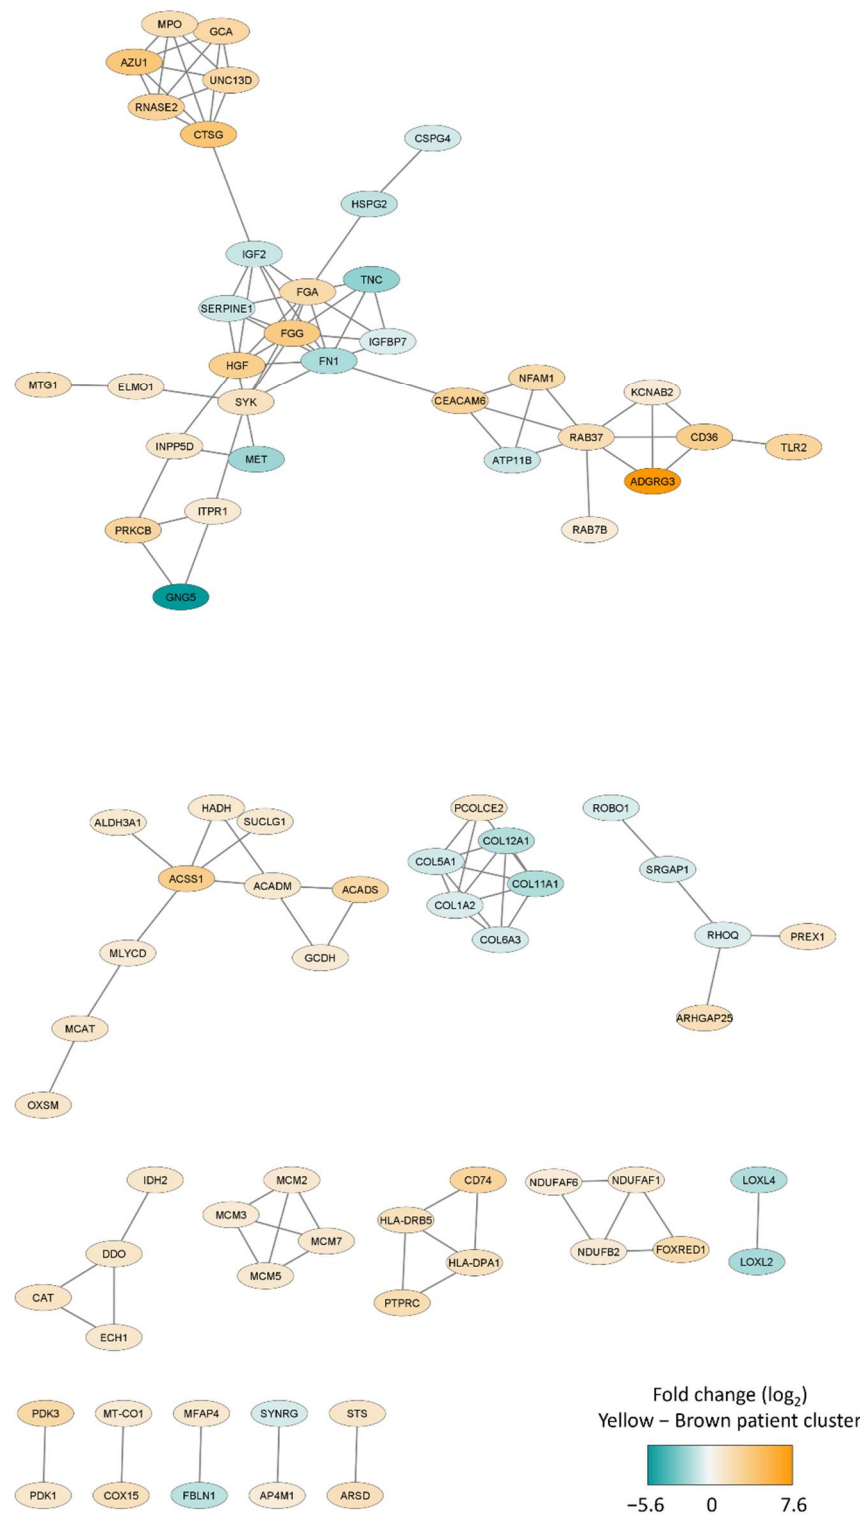

**Figure S2.** A protein-protein interaction network analysis based on the 217 MSC proteins that differed significantly between the two main patients subset in the unsupervised hierarchical cluster analysis presented in Figure 2. The original network was generated in the String database and imported to Cytoscape for processing and color coding. The color coding of the protein nodes indicates the  $\log_2$ -transformed protein fold change, where green indicates increased protein abundance and brown indicates decreased protein abundance (i.e. increased in the brown main patient color) in the upper yellow main patient cluster (n=10) identified in Figure 2 in the article.

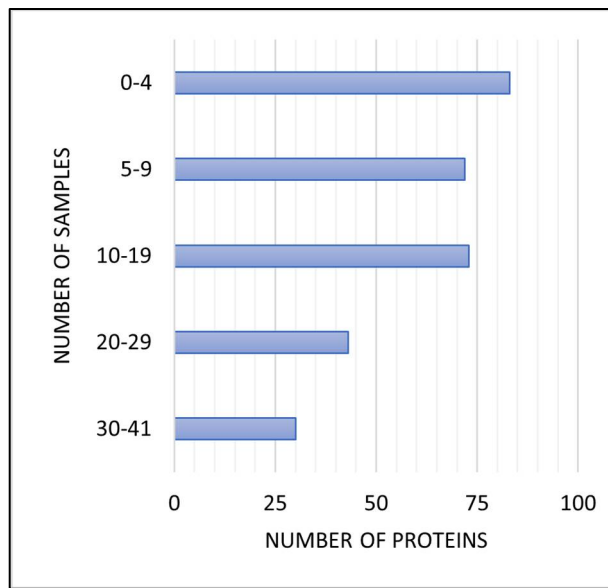

**Figure S3.** Proteins only quantified when MSCs were cultured in the presence of AML conditioned medium; 301 proteins were identified. The figure shows the number of samples/ patients (y-axis, number of samples) and the corresponding number of the 301 proteins (x-axis) that could be quantified for the indicated sample/patient number on the y-axis.





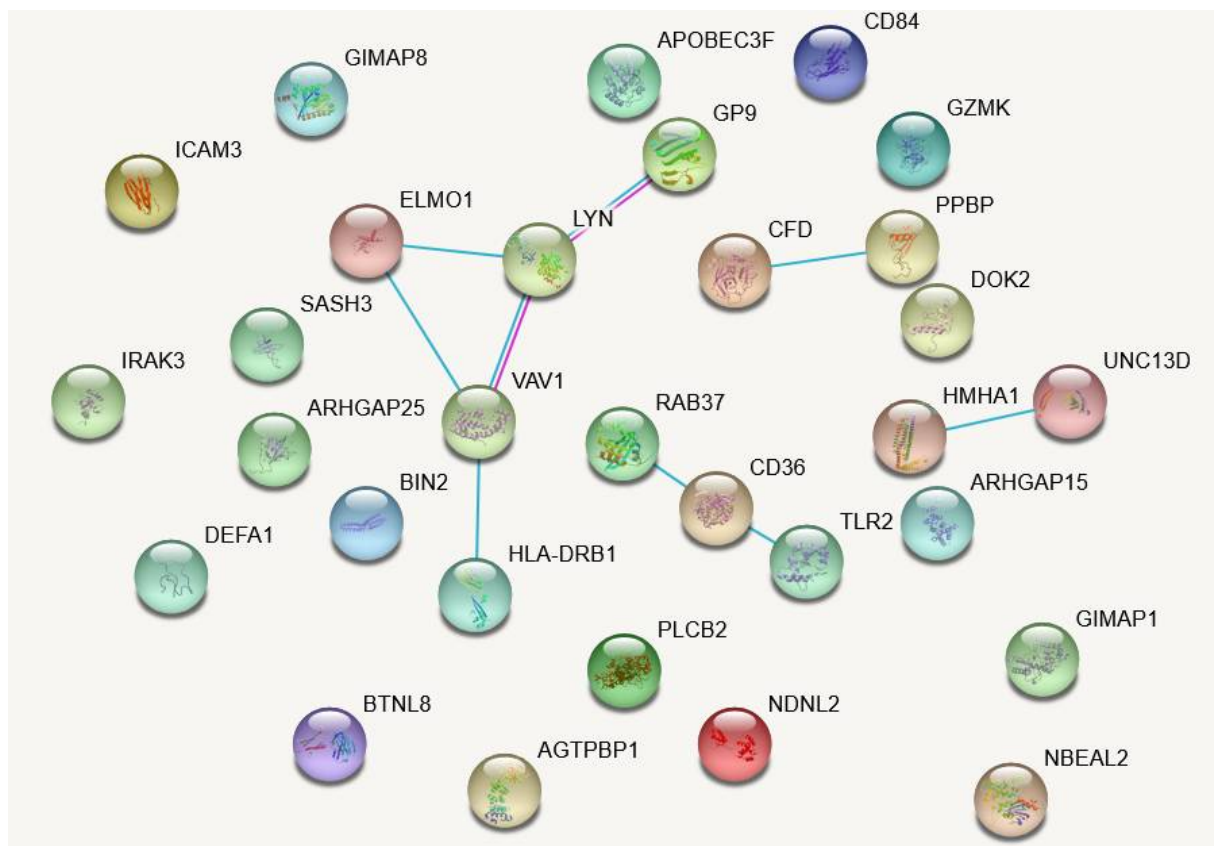

**Figure S5.** A protein-protein interaction network analysis based on 30 proteins that were quantified for at least 30 MSC samples derived from cultures supplemented with AML conditioned medium, but not for any of the four control MSCs cultured in medium alone.

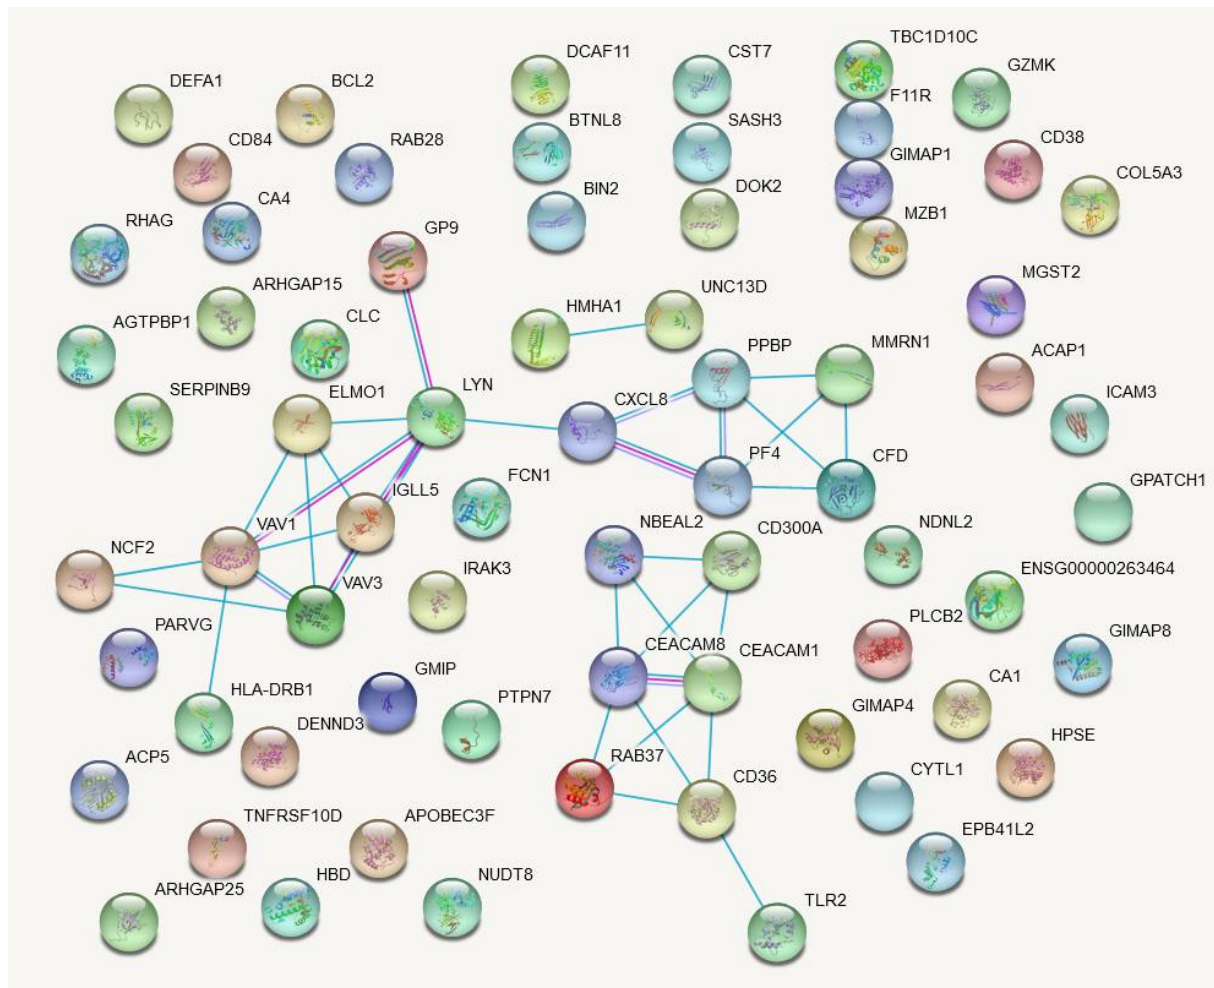

**Figure S6.** A protein-protein interaction network analysis based on all proteins that were quantified for at least 20 MSC samples derived from cultures supplemented with AML conditioned medium, but not for any of the four control MSCs cultured in medium alone.

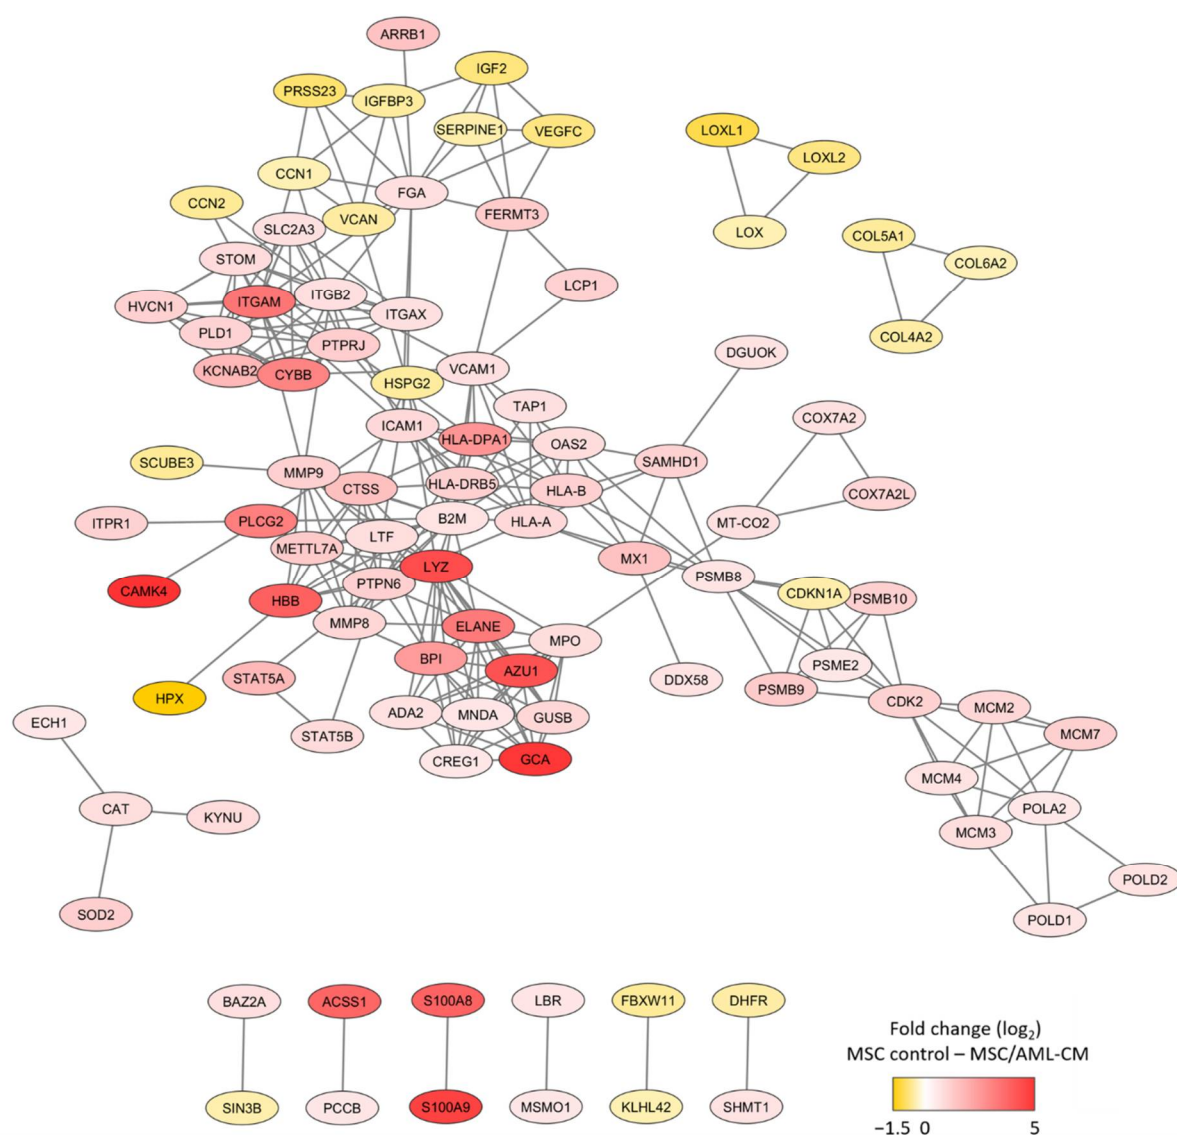

**Figure S7.** A protein-protein interaction network analysis based on the 201 MSC proteins that were significantly altered for MSCs cultured with AML conditioned medium (AML-CM). The original network was generated in the String database and imported to Cytoscape for processing and color coding. The color coding of the protein nodes indicates the log<sub>2</sub>-transformed protein fold change, where yellow indicates decreased protein abundance and red indicates increased protein abundance in MSCs after exposure to AML conditioned medium relative to MSC medium controls.
