# Supplementary material for: Patient Heterogeneity in Acute Myeloid Leukemia: Leukemic Cell Communication by Release of Soluble Mediators and Its Effects on Mesenchymal Stem Cells
Source: Diseases. 2021 Oct 16;9(4):74. doi: 10.3390/diseases9040074 (PMC8544451; doi:10.3390/diseases9040074)
Supplement: Supplementary file 1 [file diseases-09-00074-s001.zip › diseases-1400244 Aasebo-Supplementary File 2_FINAL.xlsx]

## Sheet: 1_Main data
MSC_1	MSC_2	MSC_3	MSC_4	1	11	12	14	15	8	13	3	16	17	4	19	18	25	26	33	20	23	24	21	22	10	39	36	37	35	40	31	32	41	29	6	30	27	34	2	5	7	28	9	38	Gene Symbol	Accession	Description	Count MSC-Control	Count MSC/AML-CM
NaN	NaN	NaN	NaN	NaN	NaN	NaN	NaN	NaN	21.7444	NaN	NaN	NaN	NaN	NaN	15.227	NaN	NaN	18.7784	NaN	NaN	NaN	NaN	NaN	14.5821	22.5746	NaN	14.5087	NaN	NaN	14.4735	NaN	22.9376	NaN	NaN	NaN	NaN	NaN	NaN	NaN	NaN	NaN	NaN	24.6747	NaN	ADGRG3	Q86Y34	Adhesion G protein-coupled receptor G3 OS=Homo sapiens OX=9606 GN=ADGRG3 PE=1 SV=1	0	9
NaN	NaN	NaN	NaN	NaN	18.7453	15.3419	NaN	NaN	22.9793	17.1768	17.8289	NaN	NaN	21.201	21.0188	18.46	14.1068	NaN	19.8015	18.2504	NaN	NaN	15.7187	20.268	23.9729	19.4851	NaN	NaN	NaN	18.5956	15.9581	23.0678	16.2051	19.3289	18.3073	18.8433	NaN	NaN	NaN	17.4357	16.9343	13.7048	25.0392	16.3095	CEACAM1	P13688	Carcinoembryonic antigen-related cell adhesion molecule 1 OS=Homo sapiens OX=9606 GN=CEACAM1 PE=1 SV=2	0	27
NaN	NaN	NaN	NaN	NaN	NaN	NaN	NaN	NaN	NaN	NaN	NaN	NaN	19.3029	NaN	NaN	NaN	NaN	NaN	17.6676	19.0844	NaN	NaN	18.9504	17.6279	23.093	NaN	NaN	NaN	NaN	NaN	NaN	22.0081	NaN	NaN	NaN	NaN	NaN	NaN	NaN	NaN	NaN	NaN	NaN	NaN	CD177	Q8N6Q3	CD177 antigen OS=Homo sapiens OX=9606 GN=CD177 PE=1 SV=2	0	7
31.1735	31.2859	31.326	31.2483	31.055	31.1343	31.1739	31.138	31.1748	31.0483	31.1642	31.2116	31.1438	31.1284	31.2948	31.2993	31.2646	31.2531	31.18	31.3126	31.2348	31.1323	31.2844	31.2811	31.3202	31.1405	31.2701	31.1302	31.2094	31.3941	31.2362	31.1441	31.1156	31.2138	31.2137	31.1692	31.1565	31.1122	31.3369	31.1735	31.4106	31.1584	31.1375	30.9813	31.0983	CLTC	Q00610	Clathrin heavy chain 1 OS=Homo sapiens OX=9606 GN=CLTC PE=1 SV=5	4	41
NaN	NaN	NaN	NaN	NaN	16.3664	15.5279	16.8704	NaN	19.8462	15.7127	17.6819	16.2568	NaN	18.3823	16.9877	16.4905	NaN	NaN	14.9416	NaN	NaN	14.3877	NaN	15.8012	18.5261	15.8843	16.8132	16.6271	NaN	17.1792	16.0221	18.6815	17.0978	NaN	16.4149	17.1204	NaN	16.4142	16.5223	NaN	NaN	17.8935	19.6742	16.4036	CD300A	Q9UGN4	CMRF35-like molecule 8 OS=Homo sapiens OX=9606 GN=CD300A PE=1 SV=2	0	28
32.3608	32.6213	32.4982	32.5487	31.9864	32.4718	32.396	32.473	32.4257	31.3911	32.6162	32.3705	32.2906	32.4389	32.0388	31.8776	32.3502	32.177	32.5505	32.3584	32.0652	32.3311	32.321	32.3922	32.6119	31.5736	31.9298	32.0235	32.3671	32.2719	32.2949	32.3389	32.3613	32.1504	32.3083	31.5558	32.0931	32.193	32.4316	32.1818	31.6192	31.4969	32.1706	31.5362	32.3755	COL6A3	P12111	Collagen alpha-3(VI) chain OS=Homo sapiens OX=9606 GN=COL6A3 PE=1 SV=5	4	41
NaN	NaN	NaN	NaN	NaN	NaN	NaN	NaN	NaN	15.7349	NaN	NaN	NaN	NaN	NaN	NaN	NaN	NaN	NaN	NaN	NaN	NaN	NaN	NaN	NaN	16.0885	NaN	NaN	NaN	NaN	NaN	NaN	15.6486	NaN	NaN	NaN	NaN	NaN	NaN	NaN	NaN	NaN	NaN	17.3683	12.7462	CLEC4D	Q8WXI8	C-type lectin domain family 4 member D OS=Homo sapiens OX=9606 GN=CLEC4D PE=1 SV=2	0	5
NaN	NaN	NaN	NaN	NaN	NaN	NaN	18.333	NaN	18.6093	19.0644	NaN	NaN	18.6263	19.9126	18.2277	NaN	NaN	NaN	NaN	NaN	NaN	19.1909	18.5571	NaN	20.595	NaN	NaN	NaN	19.0913	NaN	18.251	20.0981	19.4733	18.1645	NaN	18.5245	NaN	NaN	NaN	NaN	NaN	20.0733	21.7348	19.9771	CLEC5A	Q9NY25	C-type lectin domain family 5 member A OS=Homo sapiens OX=9606 GN=CLEC5A PE=1 SV=1	0	18
30.3734	30.4513	30.4393	30.3457	30.3657	30.4627	30.4951	30.4689	30.4124	30.2899	30.3608	30.4466	30.3469	30.4327	30.4855	30.5142	30.4855	30.4392	30.401	30.4301	30.5209	30.4767	30.4943	30.4859	30.5039	30.321	30.5404	30.3543	30.4247	30.4786	30.4827	30.3407	30.3557	30.4097	30.4467	30.4534	30.4628	30.4152	30.4549	30.3957	30.5506	30.4346	30.4158	29.7833	30.413	DYNC1H1	Q14204	Cytoplasmic dynein 1 heavy chain 1 OS=Homo sapiens OX=9606 GN=DYNC1H1 PE=1 SV=5	4	41
NaN	NaN	NaN	NaN	NaN	NaN	NaN	NaN	NaN	18.3258	NaN	NaN	NaN	NaN	NaN	16.1538	NaN	NaN	NaN	NaN	NaN	NaN	NaN	NaN	NaN	18.2832	17.3327	NaN	NaN	NaN	NaN	NaN	NaN	NaN	NaN	NaN	NaN	NaN	NaN	NaN	NaN	NaN	NaN	19.4869	NaN	ADAM8	P78325	Disintegrin and metalloproteinase domain-containing protein 8 OS=Homo sapiens OX=9606 GN=ADAM8 PE=1 SV=2	0	5
29.2238	29.2026	29.2827	29.2043	29.1206	29.189	29.1799	29.3856	29.2309	29.8888	29.267	29.5951	29.3802	29.2581	29.5663	29.4559	29.4265	29.2108	29.2662	29.286	29.3405	29.308	29.2121	29.2603	29.3587	29.6324	29.3074	29.1984	29.3163	29.4471	29.3231	29.286	29.2078	29.4209	29.2313	29.6123	29.2028	29.3521	29.2533	29.6076	29.6366	29.8289	29.4143	29.1295	29.7103	PRKDC	P78527	DNA-dependent protein kinase catalytic subunit OS=Homo sapiens OX=9606 GN=PRKDC PE=1 SV=3	4	41
33.0782	33.1911	33.106	33.1184	32.8948	33.1749	33.068	33.0542	33.0763	32.5184	32.9938	33.0886	33.0555	33.0851	33.007	33.0334	33.1266	33.1467	33.0537	33.0375	33.192	33.018	33.1357	33.0152	33.0384	32.6235	32.8232	32.9769	33.0379	33.1667	33.1437	33.0027	32.9569	33.0428	33.0667	32.9028	33.0846	33.1404	33.2311	32.9964	33.006	32.8792	33.105	31.7386	32.9534	FLNA	P21333	Filamin-A OS=Homo sapiens OX=9606 GN=FLNA PE=1 SV=4	4	41
29.8951	29.9797	30.0109	29.9352	29.5822	29.8208	29.7449	29.8257	29.8852	29.3058	29.7756	29.6942	29.6314	29.7904	29.6623	29.7622	29.8367	29.9449	29.8429	29.796	29.8875	29.7981	29.849	29.7165	29.8011	29.5521	29.6044	29.613	29.8051	29.9197	29.7422	29.6785	29.7437	29.8158	29.8302	29.7816	29.8245	29.9631	30.0052	29.7155	29.901	29.8007	29.843	29.0703	29.6488	FLNC	Q14315	Filamin-C OS=Homo sapiens OX=9606 GN=FLNC PE=1 SV=3	4	41
NaN	NaN	NaN	NaN	NaN	NaN	NaN	NaN	NaN	22.1311	NaN	NaN	NaN	NaN	19.7774	18.6422	NaN	NaN	NaN	NaN	NaN	NaN	NaN	NaN	NaN	22.6167	NaN	NaN	NaN	NaN	NaN	NaN	21.5794	NaN	NaN	NaN	NaN	NaN	NaN	NaN	NaN	NaN	NaN	23.5556	NaN	FCAR	P24071	Immunoglobulin alpha Fc receptor OS=Homo sapiens OX=9606 GN=FCAR PE=1 SV=1	0	6
33.4832	33.5406	33.4545	33.3646	32.8233	33.3913	33.6302	33.8023	33.6416	31.6267	33.5222	33.6235	33.7082	33.6997	33.1725	31.806	33.1867	33.423	33.5356	33.3995	31.9887	33.2467	33.6586	33.4788	33.7211	31.4593	32.5937	33.3426	33.427	33.2354	32.6453	33.608	32.9681	33.6123	33.6736	31.7758	33.3477	33.5516	33.8679	33.2391	31.811	31.7641	33.8018	31.6354	33.4019	FN1	P02751-1	Isoform 1 of Fibronectin OS=Homo sapiens OX=9606 GN=FN1	4	41
17.3732	24.0138	17.3418	17.4585	NaN	23.4517	NaN	23.8099	23.8228	NaN	23.4547	19.8946	23.6854	17.9068	17.7991	23.6954	23.7855	23.7479	23.6845	18.2238	17.5961	NaN	24.0223	23.8192	17.6462	16.7088	NaN	20.9488	23.8251	17.9701	17.1322	23.752	24.1114	24.0472	24.0714	17.4252	17.2251	23.988	23.7154	23.7038	17.5755	18.3827	23.5855	19.9966	17.3147	GNG5	P63218	Guanine nucleotide-binding protein G(I)/G(S)/G(O) subunit gamma-5 OS=Homo sapiens OX=9606 GN=GNG5 PE=1 SV=3	4	36
29.4501	29.4897	29.4319	29.2611	29.2928	29.4593	29.3361	29.5251	29.5662	28.6341	29.5029	29.3117	29.379	29.4518	29.2734	29.4172	29.4264	29.4381	29.405	29.5025	29.5675	29.5519	29.5234	29.5159	29.3853	28.7588	29.1287	29.4395	29.4325	29.6659	29.5055	29.3943	29.2628	29.3676	29.5169	29.1951	29.4497	29.5017	29.5212	29.4358	29.2773	29.0848	29.457	28.2034	29.3834	SPTAN1	Q13813-2	Isoform 2 of Spectrin alpha chain, non-erythrocytic 1 OS=Homo sapiens OX=9606 GN=SPTAN1	4	41
23.5549	23.7147	23.7314	23.6007	23.1272	23.7129	23.8008	23.4861	23.7518	23.0415	23.7427	23.4323	23.5912	23.6823	23.3993	23.5493	23.6578	23.6459	23.5873	23.5363	23.7633	23.8448	23.6735	23.6409	23.8491	23.5652	22.8429	23.3537	23.5485	23.4425	23.4116	23.2618	23.231	23.3656	23.4236	23.3126	23.1777	23.2882	23.5983	23.3445	23.4827	23.251	23.5244	22.0042	23.3439	PLEC	Q15149-3	Isoform 3 of Plectin OS=Homo sapiens OX=9606 GN=PLEC	4	41
24.5966	24.5128	24.3907	24.2177	24.2156	24.6267	24.4658	24.564	24.5452	23.669	24.5934	24.2237	24.3667	24.5083	24.2041	24.4636	24.3297	24.4945	24.376	24.5505	24.6811	24.445	24.6659	24.5041	24.6247	23.8203	24.0907	24.4773	24.3472	24.653	24.5603	24.3917	24.3455	24.3678	24.5422	24.3065	24.3941	24.4169	24.3571	24.2752	24.1927	24.0919	24.3954	23.0106	24.3267	SPTAN1	Q13813-3	Isoform 3 of Spectrin alpha chain, non-erythrocytic 1 OS=Homo sapiens OX=9606 GN=SPTAN1	4	41
NaN	20.4241	20.8231	20.325	21.0893	21.4347	NaN	20.8207	NaN	NaN	NaN	21.1286	NaN	NaN	NaN	NaN	NaN	NaN	20.3859	20.6217	NaN	NaN	NaN	NaN	NaN	18.9409	NaN	NaN	NaN	NaN	NaN	NaN	20.646	NaN	20.093	NaN	NaN	NaN	NaN	NaN	NaN	NaN	NaN	NaN	NaN	COL6A3	P12111-4	Isoform 4 of Collagen alpha-3(VI) chain OS=Homo sapiens OX=9606 GN=COL6A3	3	9
25.1986	24.7519	24.6996	24.8916	24.3622	24.6388	24.5962	24.3919	24.8073	24.0208	24.8067	24.6292	24.5947	24.6974	24.4958	24.4356	24.7569	25.0095	24.9535	24.6069	24.6054	24.4811	24.5883	24.6941	24.7452	23.9546	24.1643	24.4256	24.6945	24.5672	24.6848	24.6884	23.9777	24.4897	24.4071	24.5231	24.4565	24.6794	24.6196	24.4177	24.4896	24.3501	24.5802	23.2216	24.7476	PLEC	Q15149-4	Isoform 4 of Plectin OS=Homo sapiens OX=9606 GN=PLEC	4	41
15.2168	22.6959	15.8572	15.4122	16.3513	22.9425	NaN	21.3228	21.7355	23.52	21.0242	15.9199	25.4087	13.9342	23.179	20.8103	23.0792	21.6034	14.4064	NaN	22.0486	22.9702	15.7296	23.1283	18.241	18.7033	22.4951	15.3872	23.5506	15.6147	22.0245	14.7961	15.8272	18.9016	23.0797	23.4842	15.1666	23.4283	21.5705	22.82	15.8794	22.4585	22.6495	22.1258	21.7613	H3-3A;H3-3B	P84243	Histone H3.3 OS=Homo sapiens OX=9606 GN=H3-3A PE=1 SV=2	4	39
NaN	NaN	NaN	NaN	NaN	NaN	18.2363	NaN	NaN	22.0932	NaN	19.3196	NaN	NaN	NaN	NaN	NaN	NaN	NaN	NaN	NaN	NaN	NaN	NaN	NaN	22.671	17.4423	NaN	15.7963	18.4524	17.9562	NaN	20.28	17.3524	NaN	15.8551	NaN	NaN	NaN	NaN	NaN	NaN	17.0475	21.98	17.34	LILRB2	Q8N423	Leukocyte immunoglobulin-like receptor subfamily B member 2 OS=Homo sapiens OX=9606 GN=LILRB2 PE=1 SV=4	0	14
NaN	NaN	NaN	NaN	NaN	NaN	NaN	NaN	NaN	20.6111	NaN	20.4941	NaN	NaN	21.3764	NaN	NaN	NaN	NaN	NaN	NaN	NaN	NaN	NaN	NaN	19.8457	NaN	NaN	NaN	NaN	NaN	NaN	19.419	NaN	NaN	NaN	NaN	NaN	NaN	NaN	NaN	19.0891	NaN	20.8574	NaN	LAIR1	Q6GTX8	Leukocyte-associated immunoglobulin-like receptor 1 OS=Homo sapiens OX=9606 GN=LAIR1 PE=1 SV=1	0	7
NaN	NaN	NaN	NaN	NaN	NaN	NaN	NaN	14.0863	18.4985	NaN	NaN	NaN	NaN	NaN	16.894	NaN	NaN	NaN	NaN	NaN	NaN	NaN	NaN	15.1874	18.4238	NaN	NaN	NaN	NaN	NaN	NaN	18.502	NaN	NaN	NaN	NaN	NaN	NaN	NaN	NaN	NaN	NaN	20.5427	NaN	MMP25	Q9NPA2	Matrix metalloproteinase-25 OS=Homo sapiens OX=9606 GN=MMP25 PE=1 SV=1	0	7
33.4982	33.4782	33.4586	33.4531	33.2075	33.5195	33.448	33.359	33.4032	33.0546	33.3643	33.4299	33.337	33.3749	33.3013	33.396	33.4626	33.5055	33.4063	33.2782	33.5174	33.442	33.4719	33.4606	33.4421	33.2022	33.3513	33.2926	33.3146	33.3806	33.409	33.2761	33.2744	33.3209	33.3286	33.2498	33.3461	33.3512	33.3734	33.2336	33.315	33.2268	33.3169	32.4194	33.3415	MYH9	P35579	Myosin-9 OS=Homo sapiens OX=9606 GN=MYH9 PE=1 SV=4	4	41
NaN	NaN	NaN	NaN	17.9506	16.6328	16.5386	17.9146	14.8037	17.062	18.0997	20.1229	19.1526	17.1455	20.3481	17.038	17.2251	17.2466	17.0803	16.3595	NaN	15.7161	NaN	17.1282	18.4096	17.4113	17.7003	17.9897	17.588	17.5022	17.6302	17.4902	20.3207	20.0428	16.7843	15.2077	17.3253	16.9313	16.7267	17.9148	16.1788	17.026	18.5095	16.7106	17.7753	NBEAL2	Q6ZNJ1	Neurobeachin-like protein 2 OS=Homo sapiens OX=9606 GN=NBEAL2 PE=1 SV=2	0	39
32.779	32.8453	32.7882	32.5445	32.3244	32.799	32.6032	32.8092	32.8225	31.9772	32.7227	32.6302	32.5272	32.7122	32.5066	32.7401	32.7901	32.7746	32.7915	32.6997	32.9767	32.7379	32.8844	32.6981	32.7895	32.1666	31.9375	32.5519	32.6061	32.8158	32.7153	32.6006	32.4538	32.4353	32.6875	32.4571	32.6227	32.7098	32.7759	32.5505	32.5015	32.4001	32.6801	31.3073	32.4492	AHNAK	Q09666	Neuroblast differentiation-associated protein AHNAK OS=Homo sapiens OX=9606 GN=AHNAK PE=1 SV=2	4	41
NaN	NaN	NaN	NaN	NaN	19.8715	21.3377	NaN	NaN	26.5277	19.9575	25.0848	23.4449	20.9697	24.3167	18.3422	NaN	19.1751	22.2646	NaN	NaN	NaN	NaN	NaN	20.9372	25.3453	21.9025	22.5602	19.5555	20.6542	23.9225	21.4554	16.6689	22.415	NaN	23.2894	19.8576	NaN	21.796	22.1471	20.7228	20.2356	23.14	24.4476	20.9026	CD36	P16671	Platelet glycoprotein 4 OS=Homo sapiens OX=9606 GN=CD36 PE=1 SV=2	0	30
32.7257	32.7468	32.7375	32.6666	32.3855	32.6722	32.5963	32.637	32.6957	32.1696	32.5626	32.5153	32.4993	32.6392	32.49	32.69	32.6978	32.6934	32.6793	32.65	32.758	32.6496	32.6552	32.6485	32.651	32.2701	31.9926	32.5258	32.6431	32.6861	32.6383	32.6017	32.4963	32.5405	32.5981	32.551	32.5569	32.6317	32.6878	32.5221	32.5902	32.5631	32.6049	31.4861	32.5282	PLEC	Q15149	Plectin OS=Homo sapiens OX=9606 GN=PLEC PE=1 SV=3	4	41
29.5049	29.6056	29.565	29.639	29.2089	29.4326	29.5951	29.4887	29.5293	29.4369	29.409	29.383	29.3194	29.3309	29.306	29.6132	29.5351	29.5453	29.5561	29.4216	29.6016	29.4773	29.6575	29.5506	29.5117	29.2807	29.1612	29.4554	29.541	29.5598	29.5737	29.4484	29.3714	29.4369	29.4527	29.4483	29.3525	29.3873	29.5976	29.4065	29.5602	29.4604	29.3782	28.705	29.4527	LRP1	Q07954	Prolow-density lipoprotein receptor-related protein 1 OS=Homo sapiens OX=9606 GN=LRP1 PE=1 SV=2	4	41
NaN	NaN	NaN	NaN	20.7881	18.85	16.5977	16.6513	NaN	19.0984	17.032	21.2014	20.4795	17.0355	21.719	NaN	18.8385	18.8354	17.4428	17.2971	NaN	17.081	NaN	16.2714	18.7546	17.7234	18.4857	20.4214	19.4556	NaN	17.704	16.5347	20.6342	19.3245	17.1897	18.6264	NaN	17.188	16.7814	19.8491	18.0176	20.3344	17.2646	18.6859	NaN	RAB37	Q96AX2	Ras-related protein Rab-37 OS=Homo sapiens OX=9606 GN=RAB37 PE=1 SV=3	0	34
NaN	NaN	NaN	NaN	NaN	NaN	NaN	NaN	NaN	21.1631	NaN	NaN	NaN	NaN	NaN	19.1966	NaN	NaN	NaN	NaN	NaN	NaN	NaN	NaN	NaN	22.4872	NaN	NaN	NaN	NaN	NaN	NaN	21.4945	NaN	NaN	18.0137	NaN	NaN	NaN	NaN	NaN	NaN	NaN	23.1739	NaN	SIGLEC14	Q08ET2	Sialic acid-binding Ig-like lectin 14 OS=Homo sapiens OX=9606 GN=SIGLEC14 PE=1 SV=1	0	6
NaN	NaN	NaN	NaN	NaN	NaN	NaN	NaN	NaN	NaN	NaN	NaN	NaN	NaN	NaN	NaN	NaN	NaN	NaN	NaN	NaN	NaN	NaN	NaN	NaN	18.6772	NaN	NaN	NaN	NaN	NaN	NaN	18.3048	NaN	NaN	NaN	NaN	NaN	NaN	NaN	NaN	NaN	NaN	20.4427	NaN	SLCO4C1	Q6ZQN7	Solute carrier organic anion transporter family member 4C1 OS=Homo sapiens OX=9606 GN=SLCO4C1 PE=1 SV=1	0	3
29.1141	29.165	29.092	28.9404	28.9281	29.1591	29.0265	29.2057	29.2598	28.3246	29.2279	29.0434	29.0172	29.132	28.9971	29.0843	29.1986	29.1113	29.1204	29.0748	29.2779	29.1157	29.2118	29.1959	29.1119	28.4787	28.7487	29.0301	29.1346	29.2284	29.1598	29.0198	28.9998	28.9847	29.1181	28.7946	29.0558	29.079	29.148	29.0417	28.8682	28.7854	29.0198	27.8664	29.0494	SPTBN1	Q01082	Spectrin beta chain, non-erythrocytic 1 OS=Homo sapiens OX=9606 GN=SPTBN1 PE=1 SV=2	4	41
30.9908	31.0265	30.9972	30.8232	30.8582	31.0875	31.1323	31.0226	30.9976	30.7044	31.0006	31.1593	31.139	30.918	31.0004	30.9868	31.033	31.0735	30.9747	31.0424	31.1344	31.0094	31.096	31.0584	31.0816	30.6878	31.0177	30.936	30.9588	31.0429	31.0575	30.9063	30.8731	30.9272	31.027	30.7901	31.0083	30.9558	31.0374	30.9743	30.949	30.7924	30.9494	30.1067	30.9552	TLN1	Q9Y490	Talin-1 OS=Homo sapiens OX=9606 GN=TLN1 PE=1 SV=3	4	41
NaN	NaN	NaN	NaN	NaN	NaN	NaN	NaN	NaN	18.5906	NaN	NaN	NaN	15.8743	16.6507	NaN	NaN	NaN	NaN	15.5278	NaN	NaN	NaN	NaN	NaN	NaN	NaN	NaN	NaN	NaN	NaN	NaN	NaN	NaN	NaN	NaN	NaN	NaN	NaN	15.4755	NaN	19.8249	NaN	NaN	NaN	SLC27A2	O14975	Very long-chain acyl-CoA synthetase OS=Homo sapiens OX=9606 GN=SLC27A2 PE=1 SV=2	0	6
22.6728	22.9682	22.6333	22.6817	22.8883	22.912	22.9972	23.0719	22.6372	22.6335	22.7054	23.1973	22.4638	22.6026	22.7339	23.011	23.3647	22.6906	22.7933	22.6033	23.3451	22.9617	23.0051	23.0819	23.1357	23.0364	23.0132	22.8169	23.0272	23.1849	22.6376	22.4427	22.9918	22.9084	22.737	22.624	22.8081	22.6287	22.6398	22.9237	22.7027	22.581	22.9478	21.2001	22.8598	UBE2O	Q9C0C9	(E3-independent) E2 ubiquitin-conjugating enzyme OS=Homo sapiens OX=9606 GN=UBE2O PE=1 SV=3	4	41
17.8678	18.7999	18.4109	16.6162	17.5076	17.0704	17.2542	17.7946	18.3941	18.184	17.6667	18.3483	17.7272	17.6898	18.1132	18.4554	17.859	17.7448	17.9574	17.7547	18.4817	18.4571	18.0979	18.1622	18.1493	18.2655	15.7274	16.4692	16.9901	17.1466	17.3496	17.183	17.4996	17.2085	16.7869	18.2279	18.0351	18.188	18.3208	17.9364	18.3067	18.5029	16.2959	16.2058	17.5993	ABHD4	Q8TB40	(Lyso)-N-acylphosphatidylethanolamine lipase OS=Homo sapiens OX=9606 GN=ABHD4 PE=1 SV=1	4	41
19.5823	20.3779	19.489	20.141	20.2469	20.3412	20.8923	20.1983	20.4224	21.3252	20.5173	20.9996	20.2719	20.3599	21.3019	20.7193	20.5869	19.723	20.146	19.8636	19.9519	20.1027	19.6394	20.2393	20.0764	20.6306	20.8527	20.0329	20.591	20.2323	20.6364	20.2742	20.4193	20.228	20.2614	20.1712	20.0737	19.8174	NaN	20.6791	19.965	20.5018	20.3762	20.8198	20.7523	BCKDK	O14874	[3-methyl-2-oxobutanoate dehydrogenase [lipoamide]] kinase, mitochondrial OS=Homo sapiens OX=9606 GN=BCKDK PE=1 SV=2	4	40
24.1082	24.1051	24.2103	23.9718	23.7793	24.0017	24.0739	24.4215	24.1469	24.6418	24.1591	24.3595	24.0571	24.1789	24.5269	24.169	24.2173	24.0815	24.2739	24.0293	23.9989	24.2221	23.9456	24.2166	24.2663	23.9101	24.0641	23.888	24.1914	24.3042	24.101	24.2017	24.1216	24.4332	24.1375	24.0685	24.023	24.0196	24.1391	24.0546	24.1143	23.9412	24.422	23.0471	24.2744	MICAL1	Q8TDZ2	[F-actin]-monooxygenase MICAL1 OS=Homo sapiens OX=9606 GN=MICAL1 PE=1 SV=2	4	41
19.7737	19.3825	19.5753	19.596	20.1498	19.705	19.7666	19.7936	19.418	19.2934	19.3241	19.5146	19.4812	19.5924	20.0291	19.4985	19.1851	19.3199	19.3609	19.3116	19.4505	18.9467	19.1515	19.7183	19.532	19.7581	19.5059	19.2169	19.0793	19.1022	19.1291	20.0119	17.8157	19.8996	19.5108	19.6568	19.8466	18.9773	19.2131	19.297	19.3867	19.8259	19.35	18.9733	19.4282	MICAL3	Q7RTP6	[F-actin]-monooxygenase MICAL3 OS=Homo sapiens OX=9606 GN=MICAL3 PE=1 SV=2	4	41
19.2985	16.8751	20.6313	20.8159	21.2875	18.5434	16.6064	19.7995	20.0635	22.306	20.171	22.468	20.2444	20.6884	20.6816	20.0906	19.6504	19.6811	19.8784	19.9012	20.2294	18.9048	17.6793	20.3003	21.33	20.9043	20.3634	21.027	21.1852	19.3717	17.3364	19.6151	20.2914	19.6043	20.2598	19.9686	17.7502	19.4891	19.7381	22.2574	22.0277	21.2075	20.4772	21.1415	19.9251	PDK1	Q15118	[Pyruvate dehydrogenase (acetyl-transferring)] kinase isozyme 1, mitochondrial OS=Homo sapiens OX=9606 GN=PDK1 PE=1 SV=1	4	41
19.3765	19.5829	19.8757	18.4133	20.3747	19.2427	19.2497	19.9679	19.5873	21.2287	19.764	20.4651	20.0194	19.9789	19.951	20.5625	19.8013	20.0593	19.7139	19.8365	20.2224	19.8683	19.7102	19.7424	20.5229	20.522	19.7805	20.0729	20.1193	20.145	19.3927	19.3372	19.2819	19.4614	19.6973	19.9903	19.575	19.9739	19.8216	20.4766	19.8865	20.3889	19.9313	20.0182	19.4576	PDK2	Q15119	[Pyruvate dehydrogenase (acetyl-transferring)] kinase isozyme 2, mitochondrial OS=Homo sapiens OX=9606 GN=PDK2 PE=1 SV=2	4	41
16.2964	NaN	NaN	NaN	18.9052	17.4683	16.4986	18.3269	17.4143	21.5607	17.3252	20.0686	19.2516	17.8307	20.0497	19.3781	17.8576	16.9064	17.1854	17.3612	NaN	17.0214	16.441	16.9473	18.7241	20.5206	17.6237	18.9906	16.9239	16.8278	18.1615	NaN	20.3889	17.8867	17.4083	19.1087	NaN	17.9664	NaN	19.9331	19.7276	19.9829	17.935	22.4223	NaN	PDK3	Q15120	[Pyruvate dehydrogenase (acetyl-transferring)] kinase isozyme 3, mitochondrial OS=Homo sapiens OX=9606 GN=PDK3 PE=1 SV=1	1	36
23.7358	23.5437	23.8666	23.4904	23.9296	24.0473	24.055	23.6834	23.8261	25.1464	24.057	24.2723	24.048	24.0077	24.4451	24.1157	23.8152	23.7228	23.9662	23.9624	23.8078	23.8258	23.7295	24.0776	23.8268	24.477	23.7087	24.0554	23.8753	23.9176	23.8755	23.7812	24.0386	23.9884	23.7958	24.525	23.801	23.879	23.9338	24.463	24.3484	24.4517	23.7961	24.8008	23.7848	PDP1	Q9P0J1	[Pyruvate dehydrogenase [acetyl-transferring]]-phosphatase 1, mitochondrial OS=Homo sapiens OX=9606 GN=PDP1 PE=1 SV=3	4	41
23.309	23.2242	23.2272	22.7464	23.217	23.5047	23.2231	23.3025	23.5131	23.335	23.4137	23.0987	23.3009	23.3001	23.6217	23.5741	23.3142	23.5605	23.3058	23.3384	23.3955	23.3841	23.3566	23.5856	23.6204	23.4686	23.6917	23.6374	23.6221	23.4597	23.284	23.4049	23.4768	23.1229	23.3715	23.4516	23.4521	23.599	23.0518	23.3069	23.5296	23.5157	23.2622	22.3163	23.1614	ADI1	Q9BV57	1,2-dihydroxy-3-keto-5-methylthiopentene dioxygenase OS=Homo sapiens OX=9606 GN=ADI1 PE=1 SV=1	4	41
27.1322	27.2137	27.0987	26.9358	27.0835	27.0301	27.117	27.0417	27.2021	26.5255	26.931	27.0217	27.1632	26.9673	27.1583	27.2176	27.1955	27.1562	27.163	27.1054	27.0648	27.064	27.1034	27.0795	27.0701	26.8265	27.3077	27.0105	27.0856	27.1243	26.9672	26.9003	27.0345	26.9636	27.0728	26.8707	26.8109	26.9818	26.951	27.0638	27.0201	26.8399	26.9635	25.9271	26.945	GBE1	Q04446	1,4-alpha-glucan-branching enzyme OS=Homo sapiens OX=9606 GN=GBE1 PE=1 SV=3	4	41
27.4839	27.2854	27.3343	27.3734	27.8027	27.6007	27.6199	27.6256	27.5932	29.5115	27.7313	27.8126	27.594	27.4224	28.1255	27.8729	27.6587	27.436	27.4846	27.5441	27.4389	27.7059	27.5706	27.3687	27.4448	28.108	27.4164	27.6736	27.2542	27.4616	27.5852	27.5483	27.5416	27.5876	27.4714	28.1468	27.3896	27.6738	27.5503	27.8672	27.9505	28.1775	27.52	28.6557	27.5722	HSPE1	P61604	10 kDa heat shock protein, mitochondrial OS=Homo sapiens OX=9606 GN=HSPE1 PE=1 SV=2	4	41
27.4046	27.2486	27.4917	27.4603	27.5335	27.3176	27.3022	27.2685	27.0831	27.2703	27.2997	27.5031	27.2307	27.3975	27.4636	27.4283	27.1678	27.1972	27.3022	27.3667	27.3375	27.4454	27.3327	27.3061	27.197	28.0829	27.4453	27.3115	27.3683	27.4517	27.5402	27.8705	27.2433	27.7523	27.4592	27.8138	27.621	27.4525	27.5478	27.7682	27.7499	28.0665	27.4564	27.2133	27.7044	EFTUD2	Q15029	116 kDa U5 small nuclear ribonucleoprotein component OS=Homo sapiens OX=9606 GN=EFTUD2 PE=1 SV=1	4	41
17.5612	17.8166	17.6891	17.816	19.0006	NaN	18.0242	16.4797	18.7999	19.989	18.2416	18.4463	18.1924	18.0879	18.5834	18.3646	18.1067	17.8574	18.2413	17.7489	18.1536	18.0977	17.9979	18.2856	18.259	18.3537	17.7737	18.1942	17.9604	18.0453	17.8011	17.6673	17.5932	17.9108	18.0092	18.4699	17.4733	17.6781	17.5482	18.1449	18.1381	19.0669	17.5811	18.2828	17.2192	METTL15	A6NJ78	12S rRNA N4-methylcytidine (m4C) methyltransferase OS=Homo sapiens OX=9606 GN=METTL15 PE=1 SV=1	4	40
25.2862	25.8183	25.7546	26.0973	25.064	25.2441	25.0996	24.8821	25.1577	24.8443	25.1498	25.4261	25.3184	25.1671	25.0743	25.3573	25.2293	25.3786	25.6135	25.6557	25.3857	25.4761	25.5686	25.513	25.2545	25.0682	25.1858	25.5766	25.8481	25.6551	25.8778	25.8598	25.5732	25.8158	25.9351	25.527	25.8711	25.7328	25.8439	25.6836	25.6637	25.4748	25.9653	24.7012	25.5097	PHPT1	Q9NRX4	14 kDa phosphohistidine phosphatase OS=Homo sapiens OX=9606 GN=PHPT1 PE=1 SV=1	4	41
31.3852	31.2928	31.2055	31.1313	31.1943	31.1618	31.2395	31.2223	31.336	31.0046	31.3175	31.1882	31.2601	31.224	31.2938	31.3535	31.3476	31.3328	31.3723	31.3691	31.2724	31.3317	31.2456	31.2177	31.0526	31.0027	31.2653	31.2312	31.3081	31.3268	31.2153	31.384	31.315	31.2931	31.3705	31.2636	31.2424	31.3836	31.4832	31.3677	31.433	31.2696	31.3271	30.2473	31.172	YWHAE	P62258	14-3-3 protein epsilon OS=Homo sapiens OX=9606 GN=YWHAE PE=1 SV=1	4	41
26.4836	26.3413	26.3337	26.5209	26.7135	26.506	26.4624	26.6708	26.4774	26.1336	26.5165	26.4992	26.5617	26.5185	26.4652	26.2315	26.5342	26.6114	26.3377	26.515	26.4839	26.3225	26.3364	26.3611	26.4196	25.993	26.3513	26.6649	26.6087	26.5266	26.5758	26.4353	26.6574	26.5625	26.4936	26.3571	26.4273	26.5989	26.4225	26.3601	26.391	26.1378	26.4868	25.5711	26.5123	YWHAH	Q04917	14-3-3 protein eta OS=Homo sapiens OX=9606 GN=YWHAH PE=1 SV=4	4	41
27.6672	27.8777	27.6268	27.7033	27.8254	27.7418	27.7787	27.7362	27.895	27.4386	27.9158	27.7287	27.9045	27.8404	27.7563	27.6768	27.8721	27.8282	27.7236	27.7925	27.7381	27.5278	27.6535	27.5998	27.5324	27.3495	28.079	27.9054	27.8996	27.8539	27.9684	27.8345	28.0811	27.8926	27.8409	27.7775	27.6555	27.8694	27.9806	27.8097	27.6686	27.5832	27.9803	26.6557	27.752	YWHAG	P61981	14-3-3 protein gamma OS=Homo sapiens OX=9606 GN=YWHAG PE=1 SV=2	4	41
14.716	18.3028	17.297	13.249	23.5374	22.4957	19.067	17.5788	18.7107	25.3343	19.8075	24.5495	20.679	22.3183	26.0523	21.9214	21.4219	21.899	20.3112	21.0496	18.6415	NaN	20.223	19.565	22.5947	23.259	21.391	24.1848	22.8292	19.8464	22.3681	19.7676	20.8217	23.6909	19.5702	23.2452	21.901	18.7972	21.3715	24.1895	23.1943	17.6406	21.318	23.8704	19.4952	CD74	P04233-2	Isoform p35 of HLA class II histocompatibility antigen gamma chain OS=Homo sapiens OX=9606 GN=CD74	4	40
28.7033	28.4806	28.5599	28.8028	28.7106	28.4855	28.5562	28.7159	28.7609	28.4816	28.6779	28.5875	28.7313	28.6916	28.5936	28.6024	28.5824	28.7038	28.8252	28.7734	28.7193	28.655	28.7254	28.6263	28.4943	28.4716	28.6301	28.8977	28.7318	28.8283	28.7626	28.864	28.6375	28.6547	28.7613	28.8399	28.8675	28.9069	28.7893	28.8348	28.7811	28.734	28.8585	27.792	28.7357	YWHAQ	P27348	14-3-3 protein theta OS=Homo sapiens OX=9606 GN=YWHAQ PE=1 SV=1	4	41
30.0372	29.9611	29.9967	30.0135	30.0459	30.0935	29.9673	29.9869	30.1081	29.7981	30.017	29.9125	30.0546	30.0267	29.8786	30.0548	29.9574	30.0075	30.0228	30.119	30.1149	30.0717	29.9212	29.9875	30.0051	29.8232	30.064	30.2898	30.1572	30.1756	30.1976	30.2534	30.2142	30.1493	30.2907	30.061	30.1144	30.2127	30.0989	30.2351	30.0527	30.1326	30.3675	29.1547	30.0347	YWHAZ	P63104	14-3-3 protein zeta/delta OS=Homo sapiens OX=9606 GN=YWHAZ PE=1 SV=1	4	41
26.6651	26.8106	26.682	26.6455	26.2278	26.9051	26.8547	26.5748	26.5611	25.9927	26.8352	26.7188	26.4358	26.5472	26.4711	26.5419	26.7153	26.6668	26.589	26.5817	26.7296	26.7475	26.7954	26.6507	26.7768	26.1847	26.7157	26.5635	26.6084	26.7431	26.7814	26.7035	26.3984	26.7302	26.6636	26.3765	26.5644	26.6815	26.8778	26.6301	26.445	26.3738	26.7007	24.446	26.8279	TNKS1BP1	Q9C0C2	182 kDa tankyrase-1-binding protein OS=Homo sapiens OX=9606 GN=TNKS1BP1 PE=1 SV=4	4	41
15.1997	14.9348	NaN	20.4847	NaN	NaN	20.2669	20.289	20.4294	NaN	NaN	NaN	15.907	NaN	NaN	20.3979	20.1354	15.4928	20.2559	NaN	20.5317	NaN	20.3045	15.2194	20.0239	NaN	20.1329	NaN	20.2622	20.3541	20.4844	NaN	NaN	NaN	NaN	20.7914	NaN	NaN	20.1978	NaN	NaN	NaN	NaN	NaN	20.1828	MYO6	Q9UM54-2	Isoform 2 of Unconventional myosin-VI OS=Homo sapiens OX=9606 GN=MYO6	3	19
22.4995	23.1648	22.7807	22.5024	22.4115	22.8892	22.8497	22.773	23.1045	22.6055	23.0437	22.9819	23.0853	22.7754	22.8777	22.8391	22.9629	22.7562	22.6776	22.938	22.9523	22.9555	22.9501	23.0295	23.0007	23.2162	22.9291	22.7872	22.7422	22.7942	22.5617	22.1159	22.6299	22.5496	22.6151	22.5292	22.1748	22.549	22.6151	22.6613	22.7418	22.2661	22.4893	21.4542	22.1618	AGPAT1	Q99943	1-acyl-sn-glycerol-3-phosphate acyltransferase alpha OS=Homo sapiens OX=9606 GN=AGPAT1 PE=1 SV=2	4	41
21.5534	21.4382	21.7697	21.8244	21.7352	21.549	21.8271	21.7916	21.7919	22.354	21.5505	20.9468	21.6689	21.3238	21.639	21.7987	21.3547	21.3299	21.4794	21.4738	21.6721	21.66	21.7373	21.6266	21.6042	22.2675	22.2012	21.6922	21.1462	21.5455	21.7057	21.8137	21.3619	21.805	21.7491	22.0283	21.8213	21.6123	21.6751	21.8117	22.2302	22.4473	21.7754	22.4737	21.859	AGPAT4	Q9NRZ5	1-acyl-sn-glycerol-3-phosphate acyltransferase delta OS=Homo sapiens OX=9606 GN=AGPAT4 PE=1 SV=1	4	41
NaN	13.3955	18.3825	14.4737	21.2795	NaN	NaN	NaN	NaN	22.6211	18.6523	22.5578	19.8371	19.0295	23.1287	16.5108	NaN	17.4067	NaN	NaN	NaN	18.8952	NaN	NaN	19.4054	17.9032	20.8766	18.829	19.2347	20.4502	20.3055	19.5249	22.8182	22.3272	17.2725	NaN	21.5944	NaN	NaN	18.2564	16.9952	14.2521	21.9248	NaN	20.4846	MYO1F	O00160	Unconventional myosin-If OS=Homo sapiens OX=9606 GN=MYO1F PE=1 SV=3	3	27
21.8387	21.4135	21.2873	21.6372	21.9935	21.4923	21.173	21.4591	21.8966	22.8961	22.1744	21.7673	21.578	21.3046	22.0583	22.0035	21.9913	20.8481	21.5272	21.4201	21.584	21.9355	21.569	21.7605	21.4302	21.7179	21.7118	21.9002	21.6764	21.9709	21.8429	21.7911	21.7756	21.735	21.4456	22.1308	21.6838	21.3376	21.4811	22.1363	22.0991	22.0649	21.8618	20.8076	21.8087	AGPAT3	Q9NRZ7	1-acyl-sn-glycerol-3-phosphate acyltransferase gamma OS=Homo sapiens OX=9606 GN=AGPAT3 PE=1 SV=1	4	41
18.0976	17.8819	18.1346	17.7284	18.2989	18.6725	18.6433	18.1339	18.7119	18.1063	18.0327	18.3281	17.9014	18.2613	18.0767	18.284	18.538	18.2193	17.7857	18.2036	18.2671	18.3336	18.2017	17.5744	18.1561	17.8812	18.4705	18.0884	18.1178	18.0958	18.2292	18.0336	17.9038	18.1348	17.8773	18.2291	18.1606	17.9002	18.0018	18.1814	17.7834	18.2118	17.7001	NaN	18.1707	PIKFYVE	Q9Y2I7	1-phosphatidylinositol 3-phosphate 5-kinase OS=Homo sapiens OX=9606 GN=PIKFYVE PE=1 SV=3	4	40
NaN	NaN	NaN	NaN	16.6591	15.2997	14.7328	15.6159	NaN	17.7328	15.7706	17.1257	16.135	17.9982	17.6807	NaN	15.5449	16.744	15.7221	NaN	NaN	NaN	NaN	18.1309	16.3651	18.0137	15.239	15.5195	18.199	15.4008	15.9342	16.0943	16.0403	16.3848	16.0401	15.712	16.4236	15.0019	NaN	17.2273	14.9555	15.3892	17.1352	16.5494	15.8025	PLCB2	Q00722	1-phosphatidylinositol 4,5-bisphosphate phosphodiesterase beta-2 OS=Homo sapiens OX=9606 GN=PLCB2 PE=1 SV=2	0	34
23.7315	24.1765	24.1039	23.5641	23.8549	23.9041	23.995	24.0225	23.949	23.4809	23.8354	23.9952	23.828	24.0755	23.8828	23.8471	24.1648	24.0465	23.9464	23.9562	24.1986	23.8998	24.0427	24.0202	24.0118	23.657	23.6174	23.9293	23.8896	24.0944	24.0729	23.8036	23.9186	23.8754	24.2452	23.7464	23.7497	23.7687	23.8222	24.0483	23.6418	23.5163	23.7844	21.9467	23.8059	PLCB3	Q01970	1-phosphatidylinositol 4,5-bisphosphate phosphodiesterase beta-3 OS=Homo sapiens OX=9606 GN=PLCB3 PE=1 SV=2	4	41
21.3542	21.3856	21.5379	21.0803	21.27	21.4912	21.4968	21.2487	21.53	19.7163	21.3607	21.263	21.2394	21.4814	21.2278	21.2419	20.8639	21.5533	21.4698	20.8426	21.4399	21.5083	21.7051	21.7334	21.3383	20.4845	20.8482	21.1596	21.3527	20.7821	21.1073	21.1579	21.4483	21.26	21.373	19.6946	21.4022	21.385	21.4357	21.2821	21.0141	21.0441	21.4206	18.0051	21.335	PLCB4	Q15147	1-phosphatidylinositol 4,5-bisphosphate phosphodiesterase beta-4 OS=Homo sapiens OX=9606 GN=PLCB4 PE=1 SV=3	4	41
18.3272	19.0796	18.6549	18.5716	19.5912	19.6853	NaN	19.1519	19.6699	20.2565	18.978	19.9685	20.5402	19.3567	20.8799	NaN	19.021	19.5665	18.2199	NaN	18.9541	19.6008	18.4484	19.3121	19.2903	20.6872	19.0799	19.2693	19.2234	19.8096	18.9727	18.5575	19.391	19.6313	NaN	19.5212	19.1212	18.8532	19.5907	19.2338	20.2908	21.1836	20.2952	19.5043	18.9756	ABHD17B	Q5VST6	Alpha/beta hydrolase domain-containing protein 17B OS=Homo sapiens OX=9606 GN=ABHD17B PE=1 SV=1	4	37
21.1074	21.8577	21.4139	21.46	21.0014	21.289	21.2182	21.2945	21.9719	20.3195	21.2959	20.755	21.0739	21.2568	21.3813	21.4542	21.2715	21.1597	21.2187	21.4884	21.5342	21.5018	20.9703	21.355	21.5818	19.187	19.9305	20.298	21.9657	21.7816	20.5014	21.0451	21.6255	20.5446	19.8281	19.6329	19.4599	20.6503	20.9452	20.9621	20.8738	19.9369	21.4487	19.4447	19.5703	PLCD3	Q8N3E9	1-phosphatidylinositol 4,5-bisphosphate phosphodiesterase delta-3 OS=Homo sapiens OX=9606 GN=PLCD3 PE=1 SV=3	4	41
18.7737	19.5471	18.9117	18.5488	23.1804	20.7318	19.2248	20.111	19.6385	25.5558	21.0474	23.8848	21.1136	21.7249	23.2369	21.8904	20.5484	20.8356	21.4179	21.5074	19.6229	20.8146	19.8256	20.5804	21.2378	22.3996	20.2054	21.9599	21.735	20.0124	20.4108	20.0041	21.8872	21.8279	20.5423	21.9936	20.7026	21.1135	19.637	23.342	22.3249	23.415	21.2523	24.5884	19.834	ACADS	P16219	Short-chain specific acyl-CoA dehydrogenase, mitochondrial OS=Homo sapiens OX=9606 GN=ACADS PE=1 SV=1	4	41
23.8486	23.8625	23.8532	23.5683	24.1388	24.0568	24.2348	24.2487	24.1343	25.0798	24.3401	24.2634	23.8217	23.6627	24.0858	23.9545	23.703	23.6726	23.7831	23.8467	23.9347	24.1584	23.6725	23.8628	23.899	24.3195	24.1879	23.7403	23.7452	23.5577	23.9614	23.9317	23.8489	23.7555	23.9166	24.1052	23.8429	23.8582	23.7123	23.828	23.9877	24.1305	23.766	24.4482	23.7832	PLCH1	Q4KWH8	1-phosphatidylinositol 4,5-bisphosphate phosphodiesterase eta-1 OS=Homo sapiens OX=9606 GN=PLCH1 PE=1 SV=1	4	41
23.7991	23.6913	23.771	23.8308	23.8041	23.759	23.8585	24.1456	23.8789	23.8778	23.6922	23.576	23.7156	23.7515	23.7192	23.9627	23.8089	23.5216	24.038	23.9794	23.6387	23.8122	23.964	23.7748	23.9038	23.8363	24.116	23.9472	23.8637	24.1027	23.9876	24.0865	24.0044	23.9584	24.1409	23.9042	23.8646	24.0141	24.0049	24.0891	24.0076	24.1589	24.0319	22.3427	23.9226	PLCG1	P19174	1-phosphatidylinositol 4,5-bisphosphate phosphodiesterase gamma-1 OS=Homo sapiens OX=9606 GN=PLCG1 PE=1 SV=1	4	41
17.6476	16.5992	15.9028	18.6663	23.1108	19.1713	18.854	20.1192	18.7827	24.1239	19.3574	24.3593	22.0581	21.2841	23.1097	22.067	21.4535	20.3523	19.986	20.8792	18.1441	20.5306	18.5204	18.7249	21.7215	22.9163	19.8033	21.978	21.5084	17.3442	19.6443	18.9749	21.1193	22.1818	18.5312	23.3927	20.5702	20.7655	18.8937	23.3891	22.0933	23.6456	20.9544	25.395	17.4643	ACSS1	Q9NUB1	Acetyl-coenzyme A synthetase 2-like, mitochondrial OS=Homo sapiens OX=9606 GN=ACSS1 PE=1 SV=2	4	41
20.4686	20.1375	20.1111	19.6671	20.9721	21.2859	21.8364	21.2733	20.8543	26.4132	21.2281	22.699	20.5097	20.8807	21.9051	20.555	20.5934	20.0842	19.6913	19.443	21.4673	20.3073	20.3527	20.8247	21.1431	25.7724	22.2671	20.4506	20.294	21.1989	23.6572	22.2711	22.0375	21.7859	19.8145	19.3057	20.2134	19.6033	18.8622	19.1514	18.8963	20.2569	19.3371	25.0917	22.9197	ADA2 (CECR1)	Q9NZK5	Adenosine deaminase 2 OS=Homo sapiens OX=9606 GN=ADA2 PE=1 SV=2	4	41
17.5428	17.5414	NaN	NaN	NaN	NaN	NaN	17.6622	NaN	NaN	18.242	18.6801	NaN	17.39	NaN	18.0877	17.6257	18.2352	NaN	17.7921	17.9163	18.263	17.5212	17.4631	17.9056	17.7908	17.8558	17.2888	17.5104	18.5387	NaN	NaN	NaN	17.9761	17.562	17.7239	NaN	17.3238	NaN	NaN	17.7968	NaN	NaN	NaN	NaN	DPH2	Q9BQC3	2-(3-amino-3-carboxypropyl)histidine synthase subunit 2 OS=Homo sapiens OX=9606 GN=DPH2 PE=1 SV=1	2	23
25.2864	25.1611	25.2816	25.3697	25.3497	25.3375	25.3428	25.5747	25.4302	25.5108	25.6395	25.2737	25.3873	25.2434	25.388	25.4143	25.5077	25.2071	25.1624	25.3867	25.3209	25.3136	25.365	25.3512	25.4276	25.6466	25.3419	25.5074	25.4111	25.3729	25.5484	25.4762	25.6581	25.4503	25.3716	25.6538	25.2234	25.3344	25.2566	25.4892	25.4899	25.7033	25.3595	25.1563	25.5528	CNP	P09543	2',3'-cyclic-nucleotide 3'-phosphodiesterase OS=Homo sapiens OX=9606 GN=CNP PE=1 SV=2	4	41
26.5276	26.482	26.4381	26.5888	26.587	26.7148	26.4281	26.4489	26.6397	28.4531	26.7207	26.9212	26.6372	26.7125	26.9765	27.014	26.704	26.5261	26.5267	26.5437	26.642	26.6275	26.5066	26.6068	26.7679	27.4262	26.575	26.7771	26.5703	26.6225	26.643	26.7385	26.5657	26.6506	26.6765	27.1329	26.6461	26.4967	26.5832	27.1138	27.0288	27.4281	26.955	27.7152	26.6489	DECR1	Q16698	2,4-dienoyl-CoA reductase [(3E)-enoyl-CoA-producing], mitochondrial OS=Homo sapiens OX=9606 GN=DECR1 PE=1 SV=1	4	41
25.4656	25.515	25.5697	25.479	25.5731	25.5621	25.5247	25.4281	25.4158	25.5609	25.6569	25.4928	25.387	25.656	25.3847	25.4958	25.6627	25.5394	25.4115	25.5766	25.6244	25.5807	25.4588	25.5733	25.5238	24.9504	25.0802	25.351	25.492	25.5517	25.5576	25.5286	25.2372	25.4001	25.5346	25.6784	25.466	25.764	25.4516	25.596	25.608	25.5929	25.5853	24.6205	25.6261	PDE12	Q6L8Q7	2',5'-phosphodiesterase 12 OS=Homo sapiens OX=9606 GN=PDE12 PE=1 SV=2	4	41
19.8138	19.8745	19.8449	19.7774	19.7358	19.7105	19.95	19.5151	19.822	20.6191	20.0812	19.788	19.7165	19.826	20.0437	20.068	19.9084	19.7904	19.7489	19.9983	19.834	20.0265	19.8564	20.0651	19.8787	20.539	20.0334	19.9339	19.8714	19.7773	19.7609	19.847	19.9861	19.9652	19.9056	20.2149	19.7609	19.5888	19.5165	19.7797	19.9731	20.2257	19.7335	19.4548	19.8683	RNASEL	Q05823	2-5A-dependent ribonuclease OS=Homo sapiens OX=9606 GN=RNASEL PE=1 SV=2	4	41
15.2941	15.3441	14.1143	19.7561	21.1991	15.6741	15.7023	15.897	15.6315	19.72	20.1622	20.5996	19.5185	20.0992	20.9186	15.2946	19.3524	15.7023	14.6463	14.39	15.8363	20.2195	14.5401	20.0551	15.4826	19.911	19.9035	20.521	20.6053	14.8459	19.6209	18.9744	14.1195	21.0531	19.6346	19.8863	19.521	18.6078	NaN	20.6212	18.4719	NaN	20.3619	19.8204	NaN	PAAT	Q9H8K7	ATPase PAAT OS=Homo sapiens OX=9606 GN=PAAT PE=1 SV=2	4	38
19.2852	18.6588	19.3172	20.2684	22.1173	21.7898	21.6908	20.2416	20.4914	22.5378	21.179	21.8031	21.6603	20.0102	21.5463	22.1731	19.6289	20.6891	20.5067	21.5669	21.1283	21.2768	23.1608	19.2038	21.758	22.2206	20.6846	21.8081	20.3099	21.0197	22.0578	21.731	22.3646	20.4991	21.0169	22.4658	22.5858	21.7272	21.4555	21.8385	21.7034	22.7971	23.1858	23.2488	20.9606	AFG1L (LACE1)	Q8WV93	AFG1-like ATPase OS=Homo sapiens OX=9606 GN=AFG1L PE=1 SV=2	4	41
15.687	NaN	NaN	NaN	17.4535	17.8847	19.0596	16.7001	15.9588	16.0979	17.2826	18.8225	15.8571	NaN	16.8941	NaN	17.7482	NaN	15.8586	16.144	NaN	NaN	15.924	17.4577	15.8357	17.9453	18.9874	16.9971	15.4769	17.7191	16.0134	NaN	16.5577	19.9225	15.7748	15.9275	16.7593	15.7742	15.9665	NaN	15.64	15.3802	18.1502	15.4247	19.342	OASL	Q15646	2'-5'-oligoadenylate synthase-like protein OS=Homo sapiens OX=9606 GN=OASL PE=1 SV=2	1	34
27.4725	27.3187	27.374	27.3113	27.3807	27.4086	27.4746	27.3847	27.2822	27.4759	27.3088	27.3437	27.2972	27.434	27.4444	27.5454	27.4511	27.4354	27.3393	27.3961	27.4534	27.3645	27.2824	27.3015	27.3791	27.477	27.5762	27.3285	27.2868	27.3804	27.4533	27.3498	27.2766	27.3802	27.3879	27.4519	27.3615	27.2717	27.3895	27.3887	27.4447	27.5619	27.3642	27.1941	27.3146	PSMD1	Q99460	26S proteasome non-ATPase regulatory subunit 1 OS=Homo sapiens OX=9606 GN=PSMD1 PE=1 SV=2	4	41
25.6943	25.4974	25.7438	25.7531	25.7931	25.687	25.6572	25.6613	25.5224	25.6482	25.6299	25.6979	25.5164	25.6006	25.7522	25.5788	25.629	25.7047	25.59	25.7577	25.4409	25.6094	25.8354	25.6079	25.7249	25.6916	25.9199	25.9426	25.8885	25.7507	25.8877	25.798	25.746	25.6958	25.4997	25.7254	25.6988	25.9363	25.3558	25.8525	25.6027	25.7231	25.6422	25.1311	25.9039	PSMD10	O75832	26S proteasome non-ATPase regulatory subunit 10 OS=Homo sapiens OX=9606 GN=PSMD10 PE=1 SV=1	4	41
27.6229	27.5026	27.6212	27.3661	27.5124	27.4781	27.5065	27.6348	27.6177	27.5872	27.6979	27.6617	27.4678	27.5159	27.7163	27.7081	27.5837	27.6421	27.5826	27.5762	27.6106	27.6588	27.6111	27.6923	27.5771	27.6663	27.5327	27.382	27.438	27.5274	27.474	27.4842	27.3594	27.403	27.5053	27.6367	27.4802	27.3918	27.3542	27.4962	27.6755	27.5886	27.3936	26.9466	27.4291	PSMD11	O00231	26S proteasome non-ATPase regulatory subunit 11 OS=Homo sapiens OX=9606 GN=PSMD11 PE=1 SV=3	4	41
26.3364	26.1282	26.3536	26.4148	26.6511	26.3187	26.4304	26.5565	26.4944	26.3232	26.2105	26.5474	26.1321	26.4651	26.5272	26.4673	26.4147	26.3661	26.3362	26.31	26.4405	26.38	26.327	26.5149	26.3993	26.5526	26.7036	26.4108	26.3582	26.4887	26.5801	26.4735	26.6611	26.6536	26.4513	26.634	26.5931	26.5002	26.3194	26.6089	26.6991	26.7165	26.5696	26.1988	26.5476	PSMD12	O00232	26S proteasome non-ATPase regulatory subunit 12 OS=Homo sapiens OX=9606 GN=PSMD12 PE=1 SV=3	4	41
27.2129	27.235	27.2123	27.3317	27.3952	27.2914	27.2154	27.1767	27.1478	27.3553	27.1844	27.3161	27.1281	27.1906	27.4378	27.4391	27.161	27.3207	27.2261	27.2884	27.2603	27.2945	27.175	27.3565	27.1929	27.4179	27.3503	27.3263	27.3263	27.3453	27.331	27.2248	27.1969	27.2669	27.3486	27.4079	27.3708	27.2689	27.2367	27.2821	27.4783	27.4991	27.2251	27.0859	27.1997	PSMD13	Q9UNM6	26S proteasome non-ATPase regulatory subunit 13 OS=Homo sapiens OX=9606 GN=PSMD13 PE=1 SV=2	4	41
26.475	26.3401	26.2973	26.3335	26.2735	26.3324	26.2557	26.3126	26.1768	26.1517	26.504	26.2054	26.1492	26.1927	26.4154	26.3794	26.2662	26.2948	26.2261	26.1277	26.3149	26.3365	26.2592	26.3706	26.3068	26.4484	26.5059	26.4496	26.3019	26.3821	26.253	26.2112	26.0801	26.2561	26.3511	26.4273	26.3625	26.1789	26.2291	26.31	26.3532	26.3554	26.1923	25.835	26.2499	PSMD14	O00487	26S proteasome non-ATPase regulatory subunit 14 OS=Homo sapiens OX=9606 GN=PSMD14 PE=1 SV=1	4	41
27.9841	28.0398	28.0315	28.0607	27.9571	27.9202	28.0777	27.8909	27.9005	27.7448	27.9378	28.0108	27.7931	27.8975	27.9302	28.0479	27.955	28.0525	28.0146	28.0125	27.9724	28.0235	27.9191	28.0768	27.9718	28.0171	28.2124	27.9934	27.9702	28.0151	28.0217	27.9121	27.7313	27.9934	28.0063	28.0025	27.9339	27.9463	27.9715	28.0039	28.0902	27.9828	27.8886	27.3961	28.0547	PSMD2	Q13200	26S proteasome non-ATPase regulatory subunit 2 OS=Homo sapiens OX=9606 GN=PSMD2 PE=1 SV=3	4	41
27.2646	27.3036	27.2535	27.2407	27.3623	27.2933	27.3208	27.3352	27.3733	27.2824	27.3792	27.2845	27.3415	27.3153	27.3752	27.4471	27.3245	27.257	27.3155	27.2116	27.4365	27.288	27.303	27.3747	27.2589	27.4864	27.4031	27.2236	27.2961	27.2798	27.3703	27.3476	27.3322	27.3072	27.337	27.4754	27.3281	27.3066	27.2887	27.385	27.4798	27.4967	27.251	27.0764	27.3545	PSMD3	O43242	26S proteasome non-ATPase regulatory subunit 3 OS=Homo sapiens OX=9606 GN=PSMD3 PE=1 SV=2	4	41
25.8594	26.1008	26.1209	26.0399	26.0329	26.0197	25.9834	25.9555	26.1253	25.756	26.1695	25.9452	25.7753	26.1256	25.7892	26.0866	26.109	26.0326	25.9957	25.895	26.1437	26.1002	26.2074	26.0935	26.1168	25.9508	26.1732	26.1195	26.0144	26.0342	26.0635	26.0901	25.9783	26.105	26.1242	26.0231	26.0017	25.8925	25.9251	25.9557	25.859	25.8314	25.8582	24.9788	25.9684	PSMD4	P55036	26S proteasome non-ATPase regulatory subunit 4 OS=Homo sapiens OX=9606 GN=PSMD4 PE=1 SV=1	4	41
26.1969	26.3975	26.309	26.1179	26.2348	26.2096	26.1649	26.2244	26.2041	25.9534	26.246	26.2033	26.1874	26.1126	26.2423	26.3055	26.4377	26.3092	26.2233	26.0943	26.3066	26.3633	26.3542	26.3305	26.4139	26.2803	26.2244	26.0893	26.3532	26.2294	26.2483	26.0644	26.1686	26.1723	26.286	26.2743	26.1726	26.0967	26.1569	26.1928	26.2547	26.2235	26.1337	25.3049	26.1395	PSMD5	Q16401	26S proteasome non-ATPase regulatory subunit 5 OS=Homo sapiens OX=9606 GN=PSMD5 PE=1 SV=3	4	41
26.7673	26.7025	26.5916	26.7325	26.596	26.4895	26.6668	26.5608	26.7083	26.7938	26.6917	26.6848	26.6597	26.7427	26.7949	26.938	26.7636	26.587	26.6368	26.7937	26.7233	26.7078	26.6663	26.7081	26.6592	26.8359	27.0209	26.7916	26.8384	26.8292	26.8339	26.7743	26.8506	26.8993	26.6335	27.0482	26.764	26.7774	26.7595	26.9152	27.007	26.9999	26.6924	26.4415	26.9066	PSMD6	Q15008	26S proteasome non-ATPase regulatory subunit 6 OS=Homo sapiens OX=9606 GN=PSMD6 PE=1 SV=1	4	41
26.3426	26.3165	26.4444	25.9641	26.2983	26.1961	26.3019	26.2493	26.2056	26.11	26.3042	26.3727	26.0093	26.2412	26.3111	26.472	26.2122	26.2423	26.1916	26.1203	26.3354	26.3635	26.3749	26.4527	26.4257	26.4087	26.2966	26.0689	26.1419	26.1982	26.1438	26.1781	26.0661	26.2019	26.2135	26.2454	26.1238	26.1333	25.9726	26.1957	26.2613	26.3104	26.0817	25.8565	26.1832	PSMD7	P51665	26S proteasome non-ATPase regulatory subunit 7 OS=Homo sapiens OX=9606 GN=PSMD7 PE=1 SV=2	4	41
25.4105	25.4774	25.5927	25.5092	25.5994	25.5599	25.6176	25.6498	25.4974	25.3751	25.5518	25.3817	25.3837	25.5302	25.4566	25.5361	25.579	25.4104	25.4233	25.4327	25.5911	25.6634	25.4513	25.5748	25.7237	25.7146	25.8217	25.5627	25.5999	25.5516	25.6023	25.5601	25.4506	25.4489	25.5105	25.5879	25.4519	25.4178	25.3228	25.4209	25.4321	25.5403	25.3789	25.0675	25.3499	PSMD8	P48556	26S proteasome non-ATPase regulatory subunit 8 OS=Homo sapiens OX=9606 GN=PSMD8 PE=1 SV=2	4	41
24.5042	24.6339	24.5629	24.6971	24.6313	24.445	24.7017	24.6475	24.5175	24.0404	24.6723	24.4639	24.5823	24.3189	24.514	24.4373	24.602	24.3632	24.5199	24.9671	24.5989	24.4467	24.3366	24.5359	24.5193	24.5179	24.9114	24.4905	24.2176	24.4665	24.4528	24.5523	24.7956	24.465	24.5798	24.4411	24.3617	24.5956	24.5011	24.6565	24.2136	24.3993	24.2479	23.4906	24.4649	PSMD9	O00233	26S proteasome non-ATPase regulatory subunit 9 OS=Homo sapiens OX=9606 GN=PSMD9 PE=1 SV=3	4	41
26.9582	26.9378	26.9527	26.8253	27.0285	27.0132	27.0201	26.9271	26.9206	26.828	27.0163	27.0313	26.9412	26.9128	26.9701	27.0265	26.9228	26.9129	26.8669	26.8581	26.897	26.9616	26.9152	26.8887	26.8533	26.9028	26.9526	26.7385	26.8307	26.896	26.7627	26.9119	26.7756	26.922	26.9626	27.0808	26.9134	26.8305	26.8776	26.9337	27.0838	26.9549	26.7948	26.5211	26.9642	PSMC6	P62333	26S proteasome regulatory subunit 10B OS=Homo sapiens OX=9606 GN=PSMC6 PE=1 SV=1	4	41
27.3121	27.1558	27.3994	27.3351	27.2583	27.3298	27.2415	27.2749	27.2616	27.2137	27.2726	27.3037	27.3155	27.2662	27.3221	27.3248	27.2617	27.3414	27.3174	27.2353	27.2984	27.3124	27.2866	27.2301	27.3288	27.3433	27.3275	27.2251	27.3011	27.4193	27.2935	27.2471	27.0477	27.2333	27.2935	27.3684	27.2287	27.2996	27.3158	27.2815	27.3885	27.4184	27.266	26.8094	27.1497	PSMC1	P62191	26S proteasome regulatory subunit 4 OS=Homo sapiens OX=9606 GN=PSMC1 PE=1 SV=1	4	41
26.8304	26.5884	26.7	26.7392	26.978	26.825	26.8225	26.859	26.7685	26.6404	26.8652	26.7865	26.798	26.8973	26.8885	26.918	26.7449	26.7555	26.7061	26.7455	26.9131	26.788	26.6747	26.6734	26.6296	26.6408	26.8671	26.7615	26.679	26.728	26.7541	26.7659	26.4303	26.8088	26.7978	26.8935	26.9035	26.7234	26.7765	26.5976	26.9425	26.9308	26.7567	26.5151	26.7489	PSMC3	P17980	26S proteasome regulatory subunit 6A OS=Homo sapiens OX=9606 GN=PSMC3 PE=1 SV=3	4	41
26.9804	26.6584	26.8416	26.8072	27.0939	26.8821	26.9501	26.933	26.9391	26.6687	26.9877	26.9986	26.956	26.7621	26.9235	27.0108	27.0324	26.8946	26.9957	26.8147	26.9207	26.7382	26.8033	26.8379	26.7757	26.7642	27.2094	26.9323	26.8486	26.8971	26.8143	26.8801	27.0399	26.8663	26.9371	27.0399	26.9609	26.8353	26.9018	27.1013	26.9376	26.8732	26.7696	26.0887	26.9628	PSMC4	P43686	26S proteasome regulatory subunit 6B OS=Homo sapiens OX=9606 GN=PSMC4 PE=1 SV=2	4	41
27.4158	27.2533	27.3813	27.3732	27.4354	27.4201	27.4024	27.3909	27.4578	27.3003	27.4061	27.3577	27.314	27.2745	27.4136	27.5289	27.3015	27.3275	27.3641	27.3559	27.3393	27.3059	27.3675	27.3852	27.2791	27.4567	27.5062	27.459	27.4366	27.3591	27.3139	27.3688	27.3257	27.3063	27.4388	27.5666	27.4093	27.4079	27.3136	27.4038	27.4185	27.4969	27.3386	27.0715	27.4235	PSMC2	P35998	26S proteasome regulatory subunit 7 OS=Homo sapiens OX=9606 GN=PSMC2 PE=1 SV=3	4	41
27.1761	27.2621	27.0764	27.3574	27.1577	27.1569	27.2755	27.2241	27.3005	27.0684	27.0385	27.0714	26.9733	27.1177	27.1722	27.2407	27.2626	27.0667	27.0669	27.217	27.1345	27.0981	27.0483	27.0767	27	27.2062	27.3258	27.147	27.0375	27.0729	27.1846	27.0022	27.1195	27.2605	27.0722	27.1381	27.143	27.0035	27.1611	27.1143	27.2481	27.1112	27.0392	26.9187	27.2027	PSMC5	P62195	26S proteasome regulatory subunit 8 OS=Homo sapiens OX=9606 GN=PSMC5 PE=1 SV=1	4	41
25.604	25.6345	25.5523	25.3478	25.5269	25.8616	25.5092	25.7269	25.8851	24.9875	25.7488	25.4256	25.553	25.6914	25.5554	25.3589	25.8396	25.8155	25.7644	25.36	25.7759	25.629	25.4628	25.5063	25.2625	24.9832	25.646	25.7597	25.5847	25.7708	25.5253	25.7348	25.5688	24.9682	25.3742	25.341	25.6806	25.5797	25.6589	25.4269	25.1947	25.4244	25.3564	24.3894	25.4328	PDAP1	Q13442	28 kDa heat- and acid-stable phosphoprotein OS=Homo sapiens OX=9606 GN=PDAP1 PE=1 SV=1	4	41
21.8461	21.6879	21.4992	21.9041	21.7779	21.9982	21.5078	21.3028	21.6459	23.4605	21.5481	22.0878	21.2852	21.6596	22.038	21.956	21.26	21.6931	21.6624	21.7339	21.4621	21.9764	21.6714	22.0336	21.2434	22.834	21.7705	21.9187	21.8402	21.8539	21.9613	22.2174	21.6418	21.5447	21.8512	22.5847	21.5015	21.719	21.6697	21.7676	22.1759	22.7384	21.3834	21.6502	21.8771	MRPS10	P82664	28S ribosomal protein S10, mitochondrial OS=Homo sapiens OX=9606 GN=MRPS10 PE=1 SV=2	4	41
21.2984	21.6306	21.6305	21.5952	21.5772	21.5544	20.8869	21.3071	21.4434	22.7301	21.6435	21.2369	21.564	21.6973	22.1282	21.7934	21.2381	21.6783	21.698	21.5004	21.4526	21.0778	21.5832	20.2437	21.5698	22.0101	21.705	21.5072	21.6451	21.4415	21.5608	21.8052	20.7748	21.5773	21.8113	21.8232	21.7931	20.7287	21.5175	21.8386	21.4318	21.8025	21.9882	22.0589	20.4837	MRPS11	P82912	28S ribosomal protein S11, mitochondrial OS=Homo sapiens OX=9606 GN=MRPS11 PE=1 SV=2	4	41
21.9936	21.8024	21.9899	21.978	21.8982	21.802	21.7742	21.8444	21.971	23.4505	21.8436	22.1147	21.8188	21.8742	22.0496	21.9146	21.7455	21.8808	21.7312	21.7324	21.9715	21.9158	21.7673	21.9389	21.9768	22.2546	21.6218	21.8445	21.7014	20.7402	21.6798	21.784	21.9792	22.0051	22.0207	22.2791	21.9885	21.7258	21.8308	22.1334	22.1367	22.2524	20.8494	22.4505	20.8435	MRPS12	O15235	28S ribosomal protein S12, mitochondrial OS=Homo sapiens OX=9606 GN=MRPS12 PE=1 SV=1	4	41
20.7311	19.8631	20.947	19.4609	20.8173	21.1653	19.34	19.3888	20.2113	22.3263	21.3185	21.0911	20.9718	19.3862	20.3356	20.5078	21.1942	19.0702	20.1684	21.1611	21.0526	20.1974	21.0986	20.475	20.035	21.4949	20.6685	19.8346	19.4144	19.6091	21.2424	20.6179	19.6446	20.2064	20.3724	20.9361	20.3714	20.5767	20.2234	20.4982	19.8979	20.3655	19.2636	20.623	20.5108	MRPS14	O60783	28S ribosomal protein S14, mitochondrial OS=Homo sapiens OX=9606 GN=MRPS14 PE=1 SV=1	4	41
21.8726	22.1051	21.9621	21.5214	21.1145	21.9906	21.4413	21.56	21.4031	23.4056	21.9813	22.0901	21.3719	21.9154	22.3458	22.2177	22.0001	21.4951	21.7729	21.8155	21.8913	21.5399	21.4892	21.6086	22.1417	22.7025	21.2563	22.235	21.6531	22.0759	21.5284	22.0103	21.4482	21.9798	21.991	22.5557	21.4751	21.8281	21.7954	21.9161	22.184	22.6874	21.9774	22.7641	21.5821	MRPS15	P82914	28S ribosomal protein S15, mitochondrial OS=Homo sapiens OX=9606 GN=MRPS15 PE=1 SV=1	4	41
22.8596	22.8121	23.0782	22.9024	23.5798	22.8167	22.5146	23.4726	22.5834	24.7219	22.8762	23.5279	22.3352	22.6007	23.0352	22.8757	22.719	22.472	22.9287	22.6351	22.6129	22.9776	23.4268	23.3243	23.2741	23.9391	22.9389	23.0586	23.0964	23.1483	22.6743	23.1745	23.0189	23.2883	23.0909	23.5316	22.9855	23.0763	22.6207	23.2044	23.2069	23.4557	22.9495	23.7129	23.0499	MRPS16	Q9Y3D3	28S ribosomal protein S16, mitochondrial OS=Homo sapiens OX=9606 GN=MRPS16 PE=1 SV=1	4	41
21.7477	21.9035	21.8884	21.8994	22.2311	22.615	22.115	22.0467	22.0287	23.989	21.9071	22.3838	22.226	22.0876	22.1372	22.1363	21.7551	22.1026	21.8148	21.615	21.9984	21.9993	21.5129	21.4933	21.7262	22.6402	21.6035	21.9604	21.8452	21.9499	21.9961	21.9418	21.6967	21.9584	21.9996	22.619	22.0638	21.7519	21.8284	22.1395	22.3549	22.8532	22.1101	23.1161	21.7505	MRPS17	Q9Y2R5	28S ribosomal protein S17, mitochondrial OS=Homo sapiens OX=9606 GN=MRPS17 PE=1 SV=1	4	41
22.5719	22.4844	21.8141	22.4108	22.4042	22.5127	22.3707	22.27	21.8706	23.6764	22.5074	22.692	21.8741	21.8668	22.7717	22.6771	22.5503	22.5908	22.102	21.7578	22.6836	22.4181	22.1506	22.3909	22.18	23.0114	21.8519	22.7078	22.5662	21.8436	22.5787	22.5181	22.5819	22.0679	22.0507	22.6415	22.3481	21.9397	22.3594	22.2463	22.0691	22.8506	22.0913	21.407	22.4939	MRPS18B	Q9Y676	28S ribosomal protein S18b, mitochondrial OS=Homo sapiens OX=9606 GN=MRPS18B PE=1 SV=1	4	41
22.5965	23.1132	22.4586	22.4348	21.7349	22.6504	22.1876	22.3108	22.6041	22.5167	22.1334	22.039	21.6387	22.363	22.1691	22.5605	22.3716	22.441	22.9457	22.5335	22.3096	22.1124	23.1681	22.5215	22.5493	21.6332	21.929	22.7184	22.9677	23.1299	22.6163	22.8343	22.4325	23.1382	23.1151	22.3427	22.6343	23.0644	23.247	22.947	22.3919	22.4137	23.3608	22.3329	22.6834	MRPS18C	Q9Y3D5	28S ribosomal protein S18c, mitochondrial OS=Homo sapiens OX=9606 GN=MRPS18C PE=1 SV=1	4	41
24.7715	24.6634	24.8151	24.7598	24.8219	24.7343	24.6595	24.6305	24.8598	25.4245	24.8604	24.9411	24.6641	24.8074	25.1132	24.884	24.8622	24.7515	24.7457	24.5833	24.6553	24.5887	24.6638	24.8704	24.6861	25.0877	24.9379	24.8274	24.8953	24.6966	24.7789	24.8401	24.7704	24.8437	24.7105	25.061	24.8341	24.6422	24.6959	24.893	24.816	25.1802	24.7243	24.7524	24.7428	MRPS2	Q9Y399	28S ribosomal protein S2, mitochondrial OS=Homo sapiens OX=9606 GN=MRPS2 PE=1 SV=1	4	41
24.4511	23.9662	24.352	24.3385	24.4665	24.6741	24.5319	24.7336	24.3213	26.2713	24.5614	24.899	24.5528	24.657	24.8765	24.7707	24.3788	24.3425	24.5158	24.4534	24.4833	24.517	24.4086	24.072	24.3535	25.0521	24.2058	24.4829	24.5537	24.6088	24.6386	24.4121	24.3958	24.4451	24.4049	24.9868	24.3353	24.3384	24.2245	24.6655	24.9358	25.0703	24.4813	25.4661	24.5538	MRPS22	P82650	28S ribosomal protein S22, mitochondrial OS=Homo sapiens OX=9606 GN=MRPS22 PE=1 SV=1	4	41
23.4692	23.6477	23.6191	23.5397	23.5068	23.7741	23.4733	23.5441	23.4986	24.9902	23.5745	23.9066	23.4189	23.6115	23.8996	23.7252	23.512	23.3355	23.5243	23.5955	23.5479	23.9379	23.5272	23.6732	23.6867	24.293	23.6033	23.7833	23.4852	23.59	23.6156	23.6609	23.5407	23.8505	23.989	24.0569	23.565	23.5128	23.4129	24.0566	23.8081	24.2476	23.9884	24.268	23.5892	MRPS23	Q9Y3D9	28S ribosomal protein S23, mitochondrial OS=Homo sapiens OX=9606 GN=MRPS23 PE=1 SV=2	4	41
21.2781	21.5914	21.379	21.4046	21.2359	20.7249	21.2787	21.2989	21.3561	23.5983	21.1216	22.421	21.4284	21.4962	21.7892	21.5757	21.6311	21.3383	21.9283	21.1188	21.1855	21.5978	21.2609	21.5915	21.6063	22.5238	21.3212	21.4704	21.2498	21.4204	21.3867	21.3827	21.5057	21.1527	21.4078	22.2119	21.2718	21.7109	21.4959	21.4645	21.8154	22.4283	22.0833	22.9135	21.3653	MRPS24	Q96EL2	28S ribosomal protein S24, mitochondrial OS=Homo sapiens OX=9606 GN=MRPS24 PE=1 SV=1	4	41
22.0712	22.2692	21.5651	22.1101	22.3737	21.9666	21.9602	22.0328	21.9059	23.9003	22.0856	22.6496	22.1627	22.2127	22.3683	22.2986	21.9684	21.8521	21.5239	21.7353	22.0088	22.0534	21.6214	21.8666	21.8356	23.0494	21.8205	22.1998	20.8033	22.0139	21.4233	22.0808	22.0258	22.0945	21.7264	21.864	21.2146	21.3372	20.7167	21.5794	22.0205	22.9146	21.9759	22.9778	22.1434	MRPS25	P82663	28S ribosomal protein S25, mitochondrial OS=Homo sapiens OX=9606 GN=MRPS25 PE=1 SV=1	4	41
23.3301	23.5612	23.3426	23.3627	23.4842	23.4224	22.9917	23.2102	23.4653	24.5862	23.4236	23.653	22.7254	23.5085	23.8801	23.4653	23.4154	22.845	23.1065	23.068	23.1858	23.1367	23.3732	22.9826	23.3949	23.6091	23.3323	22.9981	23.3958	23.075	23.7073	23.1922	23.4789	23.7811	23.4345	23.8067	23.0535	23.3911	23.4624	22.803	23.7752	24.0476	23.6437	24.098	23.3703	MRPS26	Q9BYN8	28S ribosomal protein S26, mitochondrial OS=Homo sapiens OX=9606 GN=MRPS26 PE=1 SV=1	4	41
23.0897	22.7683	22.9348	22.9786	22.9816	23.1157	22.9346	23.6243	23.3791	25.7084	22.9403	23.9439	23.0905	23.111	24.0458	23.8893	23.5988	22.917	22.922	23.1111	22.8147	23.1202	22.7932	23.3981	23.1902	24.3524	23.0067	23.1784	23.257	23.199	22.7659	22.9114	22.9311	22.9938	22.9121	23.7618	22.8712	22.6248	22.2298	22.9604	23.0058	23.6924	22.6491	24.4783	23.0866	MRPS27	Q92552	28S ribosomal protein S27, mitochondrial OS=Homo sapiens OX=9606 GN=MRPS27 PE=1 SV=3	4	41
14.3151	11.8295	NaN	12.8444	20.3016	15.4724	15.504	17.7864	14.718	20.1516	16.7839	20.1953	17.6223	16.6343	21.0886	15.2639	16.4196	17.163	16.8073	13.7785	12.809	16.8955	NaN	14.5381	17.2935	15.25	16.5556	19.1168	16.926	17.0193	16.2419	15.9959	19.832	20.0353	16.6988	16.7477	17.6579	16.0985	15.449	17.9014	17.0045	17.0196	19.7638	14.6956	16.9966	ARHGAP9	Q9BRR9	Rho GTPase-activating protein 9 OS=Homo sapiens OX=9606 GN=ARHGAP9 PE=1 SV=2	3	40
23.0208	22.9042	23.2827	23.4275	23.37	23.8255	23.3349	23.6235	23.6869	24.9827	23.8974	23.731	23.4558	23.0606	24.0808	23.7572	23.5314	23.2517	23.0684	23.1748	23.5196	23.753	23.4729	23.3409	23.6212	24.1658	22.7783	23.3366	22.9203	23.521	23.7119	23.5913	23.0803	22.846	23.5242	23.7157	23.0855	23.7545	23.1278	23.4703	23.7151	23.7524	23.4253	24.2255	23.4487	DAP3	P51398	28S ribosomal protein S29, mitochondrial OS=Homo sapiens OX=9606 GN=DAP3 PE=1 SV=1	4	41
23.0283	22.7739	22.9735	23.2301	22.9912	22.6319	23.1929	23.0839	23.2609	24.8894	22.6815	23.7548	23.1682	23.1676	23.7062	23.6308	23.3143	23.1745	22.7575	23.3277	22.839	23.3015	22.8882	23.1245	23.1351	23.7854	22.7602	23.1781	23.1439	23.441	23.087	23.1055	22.715	22.7289	22.8595	23.7428	22.787	22.6121	23.1457	23.0745	23.5283	23.6748	23.3395	24.106	23.0895	MRPS31	Q92665	28S ribosomal protein S31, mitochondrial OS=Homo sapiens OX=9606 GN=MRPS31 PE=1 SV=3	4	41
NaN	18.5327	19.158	19.097	18.6443	18.6001	NaN	NaN	17.9599	20.5704	18.771	18.5628	NaN	NaN	19.0691	NaN	18.1642	18.6018	17.9238	18.9912	NaN	NaN	19.1229	NaN	19.0466	19.5529	19.4354	19.7557	18.4007	18.8428	17.9932	19.1386	18.6281	18.8297	19.1045	20.2228	18.4772	NaN	18.8233	18.0785	19.1758	19.4544	18.5942	20.3941	18.6837	MRPS33	Q9Y291	28S ribosomal protein S33, mitochondrial OS=Homo sapiens OX=9606 GN=MRPS33 PE=1 SV=1	3	32
23.2435	23.0539	23.289	22.9389	23.3648	23.1407	23.1164	23.1176	23.3321	24.6582	23.2568	23.6599	23.3527	23.1847	23.7303	23.3221	23.2703	22.9648	23.2883	23.1825	23.2405	23.5144	23.2265	23.3812	23.4671	23.9612	23.0762	23.3596	23.0595	23.2061	23.2224	23.2705	23.4246	23.279	23.173	23.5984	23.008	23.1859	23.36	23.2821	23.5366	23.8578	23.285	23.7072	23.4788	MRPS34	P82930	28S ribosomal protein S34, mitochondrial OS=Homo sapiens OX=9606 GN=MRPS34 PE=1 SV=2	4	41
24.4944	24.3786	24.4093	24.2704	24.1555	24.3994	24.5365	24.3308	24.5007	24.7602	24.6343	24.3627	24.1978	24.205	24.598	24.3797	24.4752	24.4542	24.3441	24.1054	24.3968	24.5023	24.6347	24.6565	24.3855	24.2308	24.8122	24.0542	24.1324	24.2973	24.4645	24.0756	24.3561	24.5208	24.2198	24.3536	24.1599	24.2669	24.2734	24.1929	24.0419	24.3115	24.2208	23.6698	24.2647	MRPS35	P82673	28S ribosomal protein S35, mitochondrial OS=Homo sapiens OX=9606 GN=MRPS35 PE=1 SV=1	4	41
23.5977	22.9296	23.0774	23.2261	23.3564	23.5104	23.3279	23.1725	23.1502	23.8678	23.243	23.3945	23.0239	23.1127	23.5314	23.281	23.1861	23.5	23.3277	23.1357	23.1598	23.1309	23.1497	23.0853	23.1597	23.816	23.3553	23.139	23.1	23.148	23.2445	23.2837	23.0426	23.0555	23.1302	23.5136	23.451	23.3471	22.8146	23.3117	23.5508	23.6503	22.8817	23.6785	23.1856	MRPS36	P82909	28S ribosomal protein S36, mitochondrial OS=Homo sapiens OX=9606 GN=MRPS36 PE=1 SV=2	4	41
24.248	24.0249	23.8293	24.5861	24.1214	24.2073	24.456	23.9914	24.2473	24.552	24.2295	24.1494	24.3874	24.2523	24.3726	24.1393	24.1665	24.2822	24.1767	21.3565	24.2213	23.9604	23.9717	24.0651	24.073	24.0619	24.0578	24.5354	24.2116	24.1408	24.2007	24.2379	24.1627	24.0568	24.1189	23.9306	24.3549	24.1802	24.4139	24.2922	24.1969	24.2601	23.9793	23.7022	24.2337	MRPS5	P82675	28S ribosomal protein S5, mitochondrial OS=Homo sapiens OX=9606 GN=MRPS5 PE=1 SV=2	4	41
21.7454	22.4658	22.7605	21.4254	22.5091	22.6803	22.5473	22.4531	22.2986	24.0781	22.6915	22.9032	22.6068	22.4842	22.9102	22.0081	22.5795	22.5996	22.3754	22.3762	22.5246	21.733	22.4254	22.5174	21.9073	22.4841	22.4924	22.7676	22.5074	22.2991	22.5924	21.8031	22.7258	22.8029	22.4563	22.7964	22.2888	22.7068	22.4008	22.472	22.6304	22.9852	21.9567	23.0151	21.9534	MRPS6	P82932	28S ribosomal protein S6, mitochondrial OS=Homo sapiens OX=9606 GN=MRPS6 PE=1 SV=3	4	41
23.1285	22.7864	22.8942	23.1218	23.1065	22.893	23.135	23.255	22.9922	24.7737	23.2522	23.4778	23.0811	22.984	23.4722	23.3934	22.7743	23.094	22.846	23.1203	22.935	23.2428	22.89	23.319	23.2194	24.0715	23.0781	23.4537	22.9813	23.1402	23.0284	23.1896	23.1729	23.2094	23.2532	23.692	23.0105	22.6274	22.8437	23.2821	23.3316	23.7626	23.0812	23.8743	22.6589	MRPS7	Q9Y2R9	28S ribosomal protein S7, mitochondrial OS=Homo sapiens OX=9606 GN=MRPS7 PE=1 SV=2	4	41
23.3004	23.4474	23.4307	23.2397	23.5211	23.5978	23.4967	23.7434	23.5015	24.8863	23.289	24.0598	23.5377	23.4749	23.9237	23.9317	23.0821	23.2548	23.6832	23.5341	23.2676	23.3271	23.189	23.6964	23.1764	23.8918	23.3093	23.3602	23.8637	23.6773	23.2545	23.4831	23.4878	23.814	23.5224	24.3245	23.2553	23.2111	23.7119	23.7576	23.9934	23.9884	23.7192	24.3694	23.3088	MRPS9	P82933	28S ribosomal protein S9, mitochondrial OS=Homo sapiens OX=9606 GN=MRPS9 PE=1 SV=2	4	41
22.9018	22.7733	22.6248	22.8459	23.2542	22.834	22.8694	22.8948	22.7621	22.6631	23.0516	22.8924	22.5999	22.6966	22.9253	22.6329	22.8616	22.7923	22.6692	22.6643	22.6666	22.6479	22.803	23.0086	22.7564	22.8565	22.836	22.8013	23.0666	22.8042	22.7806	22.7399	23.1263	22.5539	23.0059	23.0936	22.7429	22.9801	22.6417	22.9351	22.6447	23.1967	22.6943	22.9181	22.8746	NSUN5	Q96P11	28S rRNA (cytosine-C(5))-methyltransferase OS=Homo sapiens OX=9606 GN=NSUN5 PE=1 SV=2	4	41
21.3672	21.5227	21.879	21.097	21.1486	21.9892	21.4431	21.7431	21.2837	21.5966	21.98	21.7714	21.7181	21.3367	21.1502	21.4564	21.4749	21.3268	21.3617	21.3076	20.9664	21.611	21.4567	21.5242	20.8767	21.1999	21.6005	21.739	21.7353	21.2752	21.7286	20.7853	20.4713	21.5445	21.1472	21.2313	21.3622	21.1766	21.0062	21.3924	21.155	20.8893	20.2061	21.0987	21.0105	GCAT	O75600	2-amino-3-ketobutyrate coenzyme A ligase, mitochondrial OS=Homo sapiens OX=9606 GN=GCAT PE=1 SV=1	4	41
22.2025	22.7016	22.0458	22.6338	21.887	21.9087	22.1713	22.4266	22.5485	22.0362	22.167	22.4565	22.4334	21.668	21.9699	22.0749	22.0286	22.0846	22.4559	22.581	22.2623	22.0728	21.825	22.2032	21.9844	21.9409	22.1742	22.0893	22.3216	22.4394	22.1457	22.2774	22.2161	22.2716	22.2699	22.6132	22	22.5098	21.6763	22.4433	22.9614	22.299	22.3037	21.4593	22.2416	ADO	Q96SZ5	2-aminoethanethiol dioxygenase OS=Homo sapiens OX=9606 GN=ADO PE=1 SV=2	4	41
24.0428	24.0749	24.0093	23.9035	24.1819	23.9933	24.3387	24.2736	23.9085	23.9537	24.5335	24.21	24.1159	24.0585	24.3462	24.0744	24.2889	24.1837	24.3021	24.169	23.8625	24.1604	23.8932	24.0733	24.0255	24.0716	24.2599	24.0388	24.2698	24.2221	24.1029	24.3785	24.0538	23.9601	24.1721	24.0974	24.2531	24.1878	24.2939	24.2712	23.8796	24.154	24.164	23.108	24.2878	DNPH1	O43598	2'-deoxynucleoside 5'-phosphate N-hydrolase 1 OS=Homo sapiens OX=9606 GN=DNPH1 PE=1 SV=1	4	41
20.9625	21.1719	21.3943	22.0211	20.0189	21.1877	21.5355	20.7215	20.7883	22.0914	20.841	21.1564	20.8676	21.2078	21.3355	21.3913	20.3923	20.673	20.765	21.0809	21.2404	22.0496	20.9207	21.2501	21.4896	21.9924	21.3724	21.1346	21.193	20.5102	20.9691	21.2009	20.8841	20.5256	21.1103	21.4649	21.6673	20.8093	20.7441	20.8203	21.4364	21.6388	20.9063	22.2728	21.4983	HACL1	Q9UJ83	2-hydroxyacyl-CoA lyase 1 OS=Homo sapiens OX=9606 GN=HACL1 PE=1 SV=2	4	41
24.58	24.7953	24.9896	24.7108	24.7581	24.8648	24.8831	24.7431	24.7173	25.2391	24.5091	24.8386	24.8375	24.7382	24.9048	24.8164	24.6805	24.6684	24.7646	24.5641	24.8555	24.8697	24.8027	24.9367	25.0052	24.8127	24.9542	24.59	24.6293	26.4912	24.7576	24.3564	26.3985	24.5757	24.705	24.6708	24.5994	24.6543	24.6585	24.5564	24.8298	24.6296	24.4846	24.2078	24.5076	ILVBL	A1L0T0	2-hydroxyacyl-CoA lyase 2 OS=Homo sapiens OX=9606 GN=ILVBL PE=1 SV=2	4	41
20.7177	20.3879	20.1405	20.5342	20.6351	20.9996	20.8769	20.5458	20.8878	21.5387	20.443	20.7829	20.6965	20.5664	20.7235	21.2303	20.8041	20.0042	20.6613	20.429	20.7129	20.6017	20.6795	20.4974	20.9017	20.6795	20.8749	21.0251	20.9243	20.8187	20.8301	20.6625	20.7434	20.5773	20.6619	21.0546	17.6197	20.9555	20.5478	21.1496	20.7754	20.5011	20.3171	20.4528	20.4589	RIDA	P52758	2-iminobutanoate/2-iminopropanoate deaminase OS=Homo sapiens OX=9606 GN=RIDA PE=1 SV=1	4	41
23.0119	23.1578	23.2254	23.116	23.2846	23.2084	23.0354	23.0553	23.0816	24.7347	23.2572	23.9847	23.446	23.3077	24.2345	23.4469	23.3052	23.209	23.164	23.1868	23.0985	23.4283	23.1579	22.8185	23.1951	23.6126	23.0097	23.0016	23.0594	22.8881	23.011	23.066	23.2041	23.1018	23.3235	23.8855	23.2988	23.2529	23.0743	23.8181	23.4585	24.2598	23.3737	24.5963	22.8378	COQ5	Q5HYK3	2-methoxy-6-polyprenyl-1,4-benzoquinol methylase, mitochondrial OS=Homo sapiens OX=9606 GN=COQ5 PE=1 SV=2	4	41
NaN	NaN	NaN	NaN	NaN	NaN	20.0389	NaN	NaN	NaN	NaN	19.6677	NaN	NaN	NaN	NaN	NaN	NaN	NaN	NaN	NaN	NaN	NaN	NaN	19.7762	NaN	NaN	19.3528	NaN	NaN	NaN	18.5914	NaN	NaN	NaN	NaN	NaN	19.0665	19.2053	19.0264	18.9429	NaN	NaN	19.5786	NaN	OGFOD3	Q6PK18	2-oxoglutarate and iron-dependent oxygenase domain-containing protein 3 OS=Homo sapiens OX=9606 GN=OGFOD3 PE=1 SV=2	0	10
26.6728	26.7483	26.8316	26.8028	26.8531	26.789	26.8234	26.7461	26.7346	28.2082	26.9159	27.0868	26.7364	26.8734	27.3623	27.1135	26.6629	26.7795	26.6043	26.799	26.8002	26.6667	26.7283	26.7119	26.7094	27.6062	26.8214	26.8364	26.7154	26.8668	26.9228	26.8425	26.7972	26.9699	26.7473	27.4084	26.9791	26.8481	26.8367	26.89	27.1252	27.3705	26.8769	27.9044	26.6422	OGDH	Q02218	2-oxoglutarate dehydrogenase, mitochondrial OS=Homo sapiens OX=9606 GN=OGDH PE=1 SV=3	4	41
25.2159	25.095	25.2149	25.4996	25.691	25.712	25.5432	25.5402	25.5455	25.7862	25.3309	25.4766	25.5048	25.3401	25.5199	25.411	25.2958	25.1963	25.087	25.1272	25.2586	25.3387	25.1821	25.4258	25.6301	25.6296	25.6085	25.4694	25.4485	25.2746	25.2859	25.3002	25.1337	25.2788	25.3994	25.4044	25.431	25.3774	25.2953	25.4412	25.3853	25.5309	25.4012	24.7049	25.31	BCKDHA	P12694	2-oxoisovalerate dehydrogenase subunit alpha, mitochondrial OS=Homo sapiens OX=9606 GN=BCKDHA PE=1 SV=2	4	41
20.4622	21.3299	21.8308	20.6123	21.2179	21.2828	20.8107	21.35	21.1355	23.4072	21.3191	21.665	20.9516	21.5612	21.812	22.2077	21.0483	20.8046	21.6411	21.9841	20.9065	21.7495	20.6588	20.3484	21.7039	21.8872	21.0161	20.9625	21.6031	21.5361	20.9957	21.417	21.322	21.6875	21.6455	22.2797	21.5808	21.7524	21.2514	22.2353	22.4836	22.5705	21.2716	22.3933	21.1727	BCKDHB	P21953	2-oxoisovalerate dehydrogenase subunit beta, mitochondrial OS=Homo sapiens OX=9606 GN=BCKDHB PE=1 SV=2	4	41
21.4176	21.8399	21.4245	21.3754	21.6162	21.3508	21.9381	21.8977	22.1604	21.8042	22.2262	22.1829	21.7853	21.8668	21.9533	21.9958	22.0963	21.7864	21.5795	21.6884	22.1063	21.6383	22.0212	21.8948	21.8735	21.308	21.722	21.58	21.7739	21.7329	21.7455	21.2065	22.181	21.5755	21.7539	21.7205	21.3339	21.6114	21.5523	21.7009	21.3816	21.3433	21.6363	20.2315	21.2055	HSD3B7	Q9H2F3	3 beta-hydroxysteroid dehydrogenase type 7 OS=Homo sapiens OX=9606 GN=HSD3B7 PE=1 SV=2	4	41
25.1354	25.2363	25.3974	25.145	25.5811	25.2921	25.2414	25.5498	25.2595	25.1729	25.2178	25.0891	25.1821	25.4889	25.0554	25.3423	25.3728	25.3702	25.197	25.5399	25.5314	25.6884	25.3785	25.3114	25.387	25.1592	25.6185	25.5638	25.4023	25.3148	25.3299	25.5323	24.9026	25.5289	25.3234	25.0707	25.4615	25.2454	25.2707	25.1925	25.1098	25.2412	25.1979	24.0096	25.3551	BPNT1	O95861	3'(2'),5'-bisphosphate nucleotidase 1 OS=Homo sapiens OX=9606 GN=BPNT1 PE=1 SV=1	4	41
19.8833	19.9075	20.4672	20.0787	NaN	20.0372	19.835	20.0414	20.0328	20.7568	20.0543	20.0531	19.9313	19.5915	20.2892	19.8908	20.5522	19.9862	20.5599	20.4104	20.3163	20.0057	20.4489	19.9037	20.7475	19.4458	19.7184	19.7346	20.4843	20.0293	20.2737	20.4963	20.0031	20.1153	20.2515	20.1547	20.1795	20.3166	20.0938	20.5845	20.2372	20.0693	20.3717	19.5618	20.2227	ERI1	Q8IV48	3'-5' exoribonuclease 1 OS=Homo sapiens OX=9606 GN=ERI1 PE=1 SV=3	4	40
21.2663	20.4961	21.4772	21.2204	20.872	20.9352	21.0221	20.5951	20.7045	20.8908	20.9847	20.2415	20.5201	20.4865	21.2651	20.8432	21.5871	21.27	21.2574	20.683	21.0652	21.3092	21.5257	20.6054	20.4306	21.2163	21.4125	20.7497	21.2766	20.5399	21.5509	21.3107	21.4526	21.1938	21.0937	21.4333	21.6189	20.8414	21.5299	21.0706	21.7204	21.8107	21.3768	20.2176	21.2852	YTHDC2	Q9H6S0	3'-5' RNA helicase YTHDC2 OS=Homo sapiens OX=9606 GN=YTHDC2 PE=1 SV=2	4	41
23.7904	23.6079	23.403	23.6542	24.1938	23.8637	23.6793	23.7487	23.8152	25.2859	23.9211	24.0898	23.6448	23.8722	24.277	23.9162	23.6887	23.6721	23.5846	23.7439	23.8343	23.884	23.3456	23.8559	23.9072	24.1883	24.1264	24.0022	23.7226	23.9591	23.9386	23.7891	23.6474	23.7634	23.7107	24.3696	23.8733	23.8144	23.7032	23.8938	23.9509	24.0032	23.8241	24.4284	23.8946	MRPL1	Q9BYD6	39S ribosomal protein L1, mitochondrial OS=Homo sapiens OX=9606 GN=MRPL1 PE=1 SV=2	4	41
22.1396	22.2738	22.1378	21.6478	22.2977	22.3231	22.019	21.8461	22.1677	23.8145	21.9453	22.5597	22.4375	22.3032	22.1962	22.3726	22.2387	22.2114	22.5046	22.3387	20.7255	22.4201	20.8456	21.8709	22.3892	22.9872	22.0817	22.1111	21.915	22.5255	22.0654	22.0762	22.0619	22.0103	21.7287	22.5538	22.3874	21.9677	22.1503	22.0058	22.6771	22.4461	21.985	22.9445	21.8513	MRPL10	Q7Z7H8	39S ribosomal protein L10, mitochondrial OS=Homo sapiens OX=9606 GN=MRPL10 PE=1 SV=3	4	41
23.7894	23.9853	24.086	24.0825	24.2341	24.2017	23.7562	24.1094	24.1435	25.5335	24.3334	24.4154	24.0859	24.1369	24.3695	23.9736	23.8598	23.7862	23.999	23.714	23.7215	24.2631	23.6316	24.0093	24.0133	24.3124	23.6585	24.0168	23.9233	24.2753	23.5288	23.9613	24.0559	24.0903	24.1483	24.5435	23.8542	23.8963	23.834	24.27	24.2316	24.3474	24.1219	24.6207	24.3424	MRPL11	Q9Y3B7	39S ribosomal protein L11, mitochondrial OS=Homo sapiens OX=9606 GN=MRPL11 PE=1 SV=1	4	41
23.3715	23.826	23.7809	23.7027	23.2832	24.1277	23.7732	23.9598	23.3425	25.0764	23.5631	23.9608	23.6202	23.86	23.9679	24.0488	23.4773	23.3851	23.6591	23.9329	23.7601	23.604	23.9617	23.7432	23.6875	24.1593	22.8793	23.7512	23.4496	23.4565	23.8096	23.3613	23.4964	23.711	23.7337	24.2433	23.4373	23.6586	23.7148	23.7777	23.624	23.9863	23.837	24.6399	23.467	MRPL12	P52815	39S ribosomal protein L12, mitochondrial OS=Homo sapiens OX=9606 GN=MRPL12 PE=1 SV=2	4	41
23.8062	23.3847	23.5673	23.9324	24.1867	23.6858	23.7076	23.7754	23.8586	25.4066	23.8805	24.1681	24.0614	23.9596	24.1889	24.1736	23.8243	23.7359	23.9452	23.7759	23.7405	23.8303	23.623	23.6079	24.0393	24.3779	23.39	23.8706	23.9015	23.819	23.6879	23.7092	24.1095	23.7222	23.5674	24.4578	23.731	23.9404	23.6514	23.7807	24.0569	24.2507	23.8122	24.6177	23.7253	MRPL13	Q9BYD1	39S ribosomal protein L13, mitochondrial OS=Homo sapiens OX=9606 GN=MRPL13 PE=1 SV=1	4	41
23.0682	22.8118	22.9402	22.5594	22.8336	22.8307	22.8479	22.757	22.8138	23.6159	22.9365	22.8455	22.9553	22.8456	23.0316	22.9433	22.942	22.8059	22.9232	22.9233	22.9142	22.9473	22.6515	22.6869	22.8753	23.2134	22.4701	22.5495	22.5912	22.8882	23.019	22.917	22.8615	22.8394	22.8797	23.2285	22.7286	22.7388	22.8337	22.8811	23.0845	23.1785	23.0302	23.22	22.7973	MRPL14	Q6P1L8	39S ribosomal protein L14, mitochondrial OS=Homo sapiens OX=9606 GN=MRPL14 PE=1 SV=1	4	41
22.8816	22.6177	22.5519	22.7335	23.077	22.9233	22.8084	22.8679	22.6684	24.0967	22.8727	22.9617	23.0514	22.8575	22.9696	23.158	22.6206	22.8973	22.642	22.5705	22.6892	22.7672	22.6623	22.7784	22.7322	23.8257	22.7584	22.9379	22.9986	22.7892	22.8819	22.6431	22.7847	22.7548	22.6716	23.0621	22.4673	22.6127	22.1931	22.559	22.92	22.5481	22.7738	23.5146	22.5628	MRPL15	Q9P015	39S ribosomal protein L15, mitochondrial OS=Homo sapiens OX=9606 GN=MRPL15 PE=1 SV=1	4	41
22.8533	22.8063	22.7545	22.4363	23.3173	22.9297	22.1626	22.8345	22.8621	24.5472	22.6965	23.282	22.8175	23.1296	23.3053	23.3129	22.7353	22.6849	22.7854	22.5183	23.1002	22.572	22.8134	23.0556	23.3142	23.7565	22.8556	23.1543	23.0505	22.8364	22.8937	22.8363	23.0171	22.9602	23.0481	23.5659	22.665	22.8931	22.9149	22.3627	23.0546	23.3203	23.2485	23.328	22.9421	MRPL16	Q9NX20	39S ribosomal protein L16, mitochondrial OS=Homo sapiens OX=9606 GN=MRPL16 PE=1 SV=1	4	41
23.057	22.9179	23.1786	22.7625	23.0426	22.8619	22.9097	22.6977	23.0565	24.523	23.1414	23.4082	22.9569	22.9933	23.3797	23.2768	23.2223	22.9562	22.9996	22.9031	23.1333	23.3343	23.1418	22.9234	22.8413	23.8661	22.5456	22.8952	22.7229	22.7716	22.9694	23.0532	23.1502	22.9079	22.8044	23.4979	22.8529	22.9848	22.8153	23.2239	23.283	23.5302	22.8517	24.0596	22.9003	MRPL17	Q9NRX2	39S ribosomal protein L17, mitochondrial OS=Homo sapiens OX=9606 GN=MRPL17 PE=1 SV=1	4	41
22.1612	22.4439	22.2717	21.8893	22.3784	21.9624	22.2095	21.9791	22.1865	23.8225	22.5395	22.6042	21.8499	22.1415	22.4451	22.4472	22.6308	22.2123	22.5304	21.7556	22.368	22.4375	22.4949	22.354	22.3101	23.0651	22.634	22.606	22.4037	22.3034	22.5896	22.267	22.3943	22.2869	22.0738	22.8912	22.2502	22.2791	22.4715	22.4929	22.8403	22.8835	22.6507	22.9385	22.5019	MRPL18	Q9H0U6	39S ribosomal protein L18, mitochondrial OS=Homo sapiens OX=9606 GN=MRPL18 PE=1 SV=1	4	41
24.0554	23.9472	24.1022	24.0843	24.3134	24.1956	24.0421	24.3127	24.1076	25.1552	24.2233	24.3637	24.1794	24.1951	24.302	24.2698	23.874	23.9739	24.0945	24.0692	24.3216	24.1649	24.1049	24.4845	24.4243	24.4555	23.8604	24.0893	24.0008	24.0931	24.0902	24.0909	23.9295	23.9787	24.0497	24.4054	23.9559	23.9185	23.882	24.2924	24.2071	24.3213	24.0386	24.5613	23.8513	MRPL19	P49406	39S ribosomal protein L19, mitochondrial OS=Homo sapiens OX=9606 GN=MRPL19 PE=1 SV=2	4	41
22.9733	23.3295	22.998	22.6365	23.0347	23.3164	22.942	23.4517	23.4196	24.8027	23.5253	22.9984	23.3626	22.835	23.5734	23.9153	23.2191	23.3917	23.8042	22.8736	22.6931	23.09	22.8504	23.4445	23.0772	23.497	23.2642	22.9759	23.3935	23.2094	22.805	22.8944	23.3831	23.2853	22.922	23.6747	22.6544	22.9252	22.7942	23.41	23.1848	23.1084	23.2714	22.9643	23.474	MRPL2	Q5T653	39S ribosomal protein L2, mitochondrial OS=Homo sapiens OX=9606 GN=MRPL2 PE=1 SV=2	4	41
22.1639	22.1517	21.9476	22.1602	22.3571	22.2533	22.0085	22.2167	22.4436	23.6153	22.1779	22.2852	22.4018	22.1478	22.5952	22.2975	22.2864	21.938	22.0538	22.0298	21.9619	22.1826	22.0103	22.2841	22.2466	22.5868	22.108	22.1973	22.1156	22.124	22.1246	22.0221	22.3519	21.8854	21.9553	22.5853	22.1557	22.0456	21.9272	22.2591	22.3514	22.3997	22.1004	22.6466	21.9563	MRPL20	Q9BYC9	39S ribosomal protein L20, mitochondrial OS=Homo sapiens OX=9606 GN=MRPL20 PE=1 SV=1	4	41
22.4664	22.6527	22.2709	22.9904	23.1869	23.1371	22.6423	22.6618	22.9943	24.5399	22.8869	22.9969	23.2315	22.785	22.8778	22.8882	22.6786	22.6952	22.7385	22.6008	22.5036	22.9339	22.2794	22.8021	22.9053	23.6902	22.3942	22.7235	22.5582	22.9897	22.6741	22.2979	22.9204	22.6886	22.7054	23.4499	22.8454	22.2739	22.8509	22.6247	23.3882	23.4434	22.4311	23.6454	22.5522	MRPL21	Q7Z2W9	39S ribosomal protein L21, mitochondrial OS=Homo sapiens OX=9606 GN=MRPL21 PE=1 SV=2	4	41
21.7162	20.723	21.4585	22.0429	22.2871	21.6199	21.6152	22.1257	22.0939	23.7675	19.7487	22.3091	21.6555	22.0689	22.4335	21.6775	20.0693	21.5677	20.3692	21.4095	21.7057	22.1741	21.8954	22.0526	21.8466	22.8871	21.9613	22.3334	22.1169	21.8258	22.0639	22.1647	20.7072	21.6576	21.8282	22.801	22.2955	18.8372	21.8873	22.076	22.2844	22.6735	22.4028	23.0627	22.0445	MRPL22	Q9NWU5	39S ribosomal protein L22, mitochondrial OS=Homo sapiens OX=9606 GN=MRPL22 PE=1 SV=1	4	41
21.1275	20.96	21.0962	20.7546	21.4389	22.0829	21.442	21.1832	21.4943	22.6863	21.7708	21.9044	22.0372	21.4471	21.935	21.571	21.1046	21.2872	21.3672	21.201	21.2644	21.1126	20.6659	21.152	21.0718	21.2269	21.2739	21.0026	21.122	21.7889	21.0802	20.8384	21.1399	21.0655	21.099	21.5743	21.1227	20.8414	21.2761	21.2129	21.696	21.272	21.0852	20.9482	21.47	MRPL23	Q16540	39S ribosomal protein L23, mitochondrial OS=Homo sapiens OX=9606 GN=MRPL23 PE=1 SV=1	4	41
22.5344	22.4829	22.5993	22.7152	22.7869	22.738	22.4999	22.6923	22.659	24.1327	22.6728	22.8575	22.6731	22.8417	23.1876	22.8286	22.6562	22.6361	22.3741	22.4988	22.285	22.4195	22.4262	22.5148	22.3749	23.145	22.1169	22.5326	22.5307	22.5334	22.5395	22.4827	22.5716	22.7759	22.4997	22.985	22.3513	22.4166	22.5569	22.7721	22.8583	22.931	22.7121	23.2833	22.5983	MRPL24	Q96A35	39S ribosomal protein L24, mitochondrial OS=Homo sapiens OX=9606 GN=MRPL24 PE=1 SV=1	4	41
21.752	21.6709	22.0873	21.9912	21.8683	21.9535	21.8149	21.4982	22.0421	23.4248	22.1055	22.3321	21.9068	22.2146	21.9004	22.2873	21.9861	21.891	21.8689	21.8767	22.1286	21.8699	21.6689	22.0387	22.0677	22.8972	21.8172	22.0942	22.0558	21.8905	22.0761	22.0462	21.6987	21.8914	21.8576	22.6165	21.6564	21.8705	22.0382	21.9305	21.9746	22.3455	22.2626	22.7814	22.152	MRPL27	Q9P0M9	39S ribosomal protein L27, mitochondrial OS=Homo sapiens OX=9606 GN=MRPL27 PE=1 SV=1	4	41
23.8414	23.7468	23.286	23.8415	23.3816	23.6639	23.5434	23.8762	23.5878	23.9987	23.6606	23.4936	23.6343	23.7967	23.4955	23.4512	23.4055	23.6289	23.6607	23.6634	23.6462	23.6381	23.4613	23.5698	23.4901	23.4356	23.7226	23.8715	23.6428	23.7194	23.7844	23.6813	23.6419	23.7334	23.9147	23.4754	23.3854	23.6669	23.5666	23.5188	23.4985	23.4221	23.3565	23.396	23.4312	MRPL28	Q13084	39S ribosomal protein L28, mitochondrial OS=Homo sapiens OX=9606 GN=MRPL28 PE=1 SV=4	4	41
24.7409	24.1672	24.0966	24.27	24.9192	24.1752	24.1826	24.6137	24.2298	25.9335	24.6225	24.9198	24.551	24.7375	24.9395	24.6331	24.3522	24.6639	24.7821	24.3906	24.3728	24.4053	24.4005	24.2977	24.2644	24.9149	24.3261	24.4527	24.4557	24.5885	24.4469	24.4364	24.5662	24.3656	24.4797	25.1749	24.52	24.3103	24.2504	24.7289	24.811	25.0976	24.5498	25.2518	24.2482	MRPL3	P09001	39S ribosomal protein L3, mitochondrial OS=Homo sapiens OX=9606 GN=MRPL3 PE=1 SV=1	4	41
20.2444	21.0148	19.9435	19.51	20.1747	20.1173	21.126	21.4523	19.7036	22.3146	20.384	20.0306	19.9488	20.0713	20.3007	20.5367	20.256	20.3346	20.9999	20.6113	21.2435	20.369	20.8911	19.8298	20.8915	20.6656	19.4982	21.671	21.1555	20.8494	19.5624	19.8687	20.9888	20.9878	19.8781	21.6726	19.9317	20.9189	19.7844	19.64	21.0276	18.8139	21.0701	20.8514	19.4596	MRPL30	Q8TCC3	39S ribosomal protein L30, mitochondrial OS=Homo sapiens OX=9606 GN=MRPL30 PE=1 SV=1	4	41
21.1396	20.8465	21.2351	20.9928	21.2104	21.1706	21.07	21.0254	21.2096	22.0609	21.4651	21.1498	21.2366	20.8775	21.2043	20.4779	21.0622	21.0556	21.1756	20.9958	20.8559	21.5308	20.7825	20.7953	20.8075	21.4011	20.9601	21.1195	21.0939	21.1741	20.8225	21.2965	21.0214	21.0818	21.0326	21.2415	21.1993	20.9947	21.2415	21.3728	21.437	21.298	21.0001	21.3461	20.3551	MRPL32	Q9BYC8	39S ribosomal protein L32, mitochondrial OS=Homo sapiens OX=9606 GN=MRPL32 PE=1 SV=1	4	41
21.0452	21.2374	21.0639	20.2662	20.6278	19.9239	20.8177	20.9788	20.869	19.9058	20.92	21.0706	20.6093	20.8854	20.8396	20.8073	21.0166	20.925	21.0733	20.7985	21.1366	21.4376	20.7571	20.744	20.8486	21.4354	20.6335	20.2346	20.5033	20.7459	20.6764	20.6971	20.6989	20.7879	21.2596	20.4123	21.0464	20.3236	20.7846	20.9098	20.9483	21.1714	20.9446	19.7001	20.7808	MRPL34	Q9BQ48	39S ribosomal protein L34, mitochondrial OS=Homo sapiens OX=9606 GN=MRPL34 PE=1 SV=1	4	41
22.1691	22.3063	22.3456	22.5201	21.9731	22.2464	21.9459	22.0415	21.7412	22.3913	22.0528	21.6324	22.2048	22.4704	22.3004	22.7251	21.9826	22.2689	22.4727	22.3584	22.1117	22.2714	22.099	22.4019	22.3907	22.5051	22.3676	22.4514	22.3893	22.5257	22.452	22.4044	21.8698	22.8204	22.5233	22.3458	22.3685	22.3807	22.5045	21.9416	22.1965	22.3577	22.7442	21.5992	22.586	MRPL35	Q9NZE8	39S ribosomal protein L35, mitochondrial OS=Homo sapiens OX=9606 GN=MRPL35 PE=1 SV=3	4	41
25.2974	25.5034	25.538	25.2511	25.5397	25.2886	25.2502	25.3983	25.1865	26.3229	25.6217	25.6595	25.3714	25.457	25.728	25.4932	25.5213	25.1664	25.5035	25.3591	25.4722	25.4237	25.5349	25.4939	25.5298	25.9856	25.4408	25.447	25.4707	25.4865	25.3832	25.5085	25.4716	25.5241	25.2945	25.7315	25.336	25.2815	25.3262	25.48	25.4649	25.8365	25.5602	25.6116	25.5531	MRPL37	Q9BZE1	39S ribosomal protein L37, mitochondrial OS=Homo sapiens OX=9606 GN=MRPL37 PE=1 SV=2	4	41
23.6437	23.2876	23.2179	23.1385	23.864	23.1604	23.2683	23.4893	23.5679	25.1347	23.0582	23.7746	23.398	23.5678	23.6496	23.513	23.5003	23.0414	23.164	23.5847	23.3872	23.5344	23.1012	23.1985	23.3218	24.3159	22.839	23.5394	23.2683	23.052	23.1075	23.4002	23.5926	23.5027	22.8637	23.7329	23.2302	23.5146	23.2579	23.3421	23.8921	24.042	23.2947	26.599	23.3606	MRPL38	Q96DV4	39S ribosomal protein L38, mitochondrial OS=Homo sapiens OX=9606 GN=MRPL38 PE=1 SV=2	4	41
23.1924	23.5041	23.2876	23.4178	23.7253	23.6843	23.2883	23.521	23.4298	25.1113	23.7196	23.869	23.5251	23.4773	23.9053	23.5707	23.4319	23.2914	23.2535	23.554	23.5025	23.6506	23.3543	23.5668	23.3415	24.2424	23.0769	23.3709	23.1514	23.4009	23.4608	23.7128	23.282	23.2995	23.4169	23.905	23.5162	23.1811	23.2302	23.4855	24.1039	23.7957	23.4517	24.3488	23.235	MRPL39	Q9NYK5	39S ribosomal protein L39, mitochondrial OS=Homo sapiens OX=9606 GN=MRPL39 PE=1 SV=3	4	41
23.1326	23.2295	23.5671	23.2658	23.6051	23.6818	23.5937	23.219	23.3491	24.9319	23.5527	24.0132	23.6003	23.6171	24.0941	24.0022	23.6193	23.2563	23.5122	23.6995	23.5519	23.456	23.2264	23.3754	23.7297	24.3694	22.9389	23.0852	23.2611	23.3806	23.8564	23.4732	23.3382	23.6347	23.3656	24.0686	23.537	22.9072	23.3924	23.2617	24.0875	24.0346	23.3814	24.0599	22.995	MRPL4	Q9BYD3	39S ribosomal protein L4, mitochondrial OS=Homo sapiens OX=9606 GN=MRPL4 PE=1 SV=1	4	41
22.3632	22.3306	22.1785	22.1225	22.7054	22.3715	22.1555	22.1897	22.1666	23.0011	22.2551	22.5138	22.4225	22.1301	22.4611	22.4885	21.9856	21.9981	22.2014	22.2518	22.1356	22.3668	22.1453	21.9344	22.2902	22.4926	21.6711	22.2652	22.2118	22.2882	22.2564	22.3247	22.0626	22.4999	22.1042	22.5656	22.2988	22.2636	22.0213	22.3795	22.1003	22.4471	22.2221	22.1512	22.3723	MRPL40	Q9NQ50	39S ribosomal protein L40, mitochondrial OS=Homo sapiens OX=9606 GN=MRPL40 PE=1 SV=1	4	41
23.7631	23.6214	23.8918	23.4381	23.631	23.687	23.5925	23.8622	23.6578	24.0715	23.5196	23.7642	23.8106	23.4649	23.6721	23.8998	23.5677	23.6624	23.8091	23.7615	23.7765	24.0077	23.7686	23.8131	24.0042	23.724	23.3754	23.5209	23.5865	23.9405	23.8368	23.7832	23.0943	23.563	23.8377	23.8226	23.7574	23.5984	23.7923	23.635	23.9543	23.5857	23.5368	23.2935	23.7935	MRPL41	Q8IXM3	39S ribosomal protein L41, mitochondrial OS=Homo sapiens OX=9606 GN=MRPL41 PE=1 SV=1	4	41
21.3371	20.507	21.2591	21.1814	21.4074	20.6697	20.9166	21.2721	20.7767	22.6113	21.034	21.25	21.1301	21.0181	21.2787	21.4991	20.8583	20.8838	21.1237	21.4321	21.4057	21.4599	21.1032	21.1696	21.2513	21.4982	20.7247	21.1874	20.9925	21.3515	21.1411	21.4908	21.2895	21.4495	21.3341	21.5194	21.5692	21.2141	20.7594	21.4342	21.4273	21.423	21.4494	22.2158	21.1982	MRPL42	Q9Y6G3	39S ribosomal protein L42, mitochondrial OS=Homo sapiens OX=9606 GN=MRPL42 PE=1 SV=1	4	41
22.7835	22.3795	22.6792	22.8417	23.2947	22.7666	22.7371	22.6228	22.8666	24.827	23.0282	23.2496	22.6104	22.7918	23.2885	23.0449	22.7991	22.5869	22.9288	22.9828	22.7914	22.5772	22.5931	22.5107	22.3338	23.5937	22.389	22.8692	22.7868	22.9954	22.642	22.9964	22.6901	22.8038	22.6189	23.7649	22.5792	22.7294	22.4448	22.9705	23.2506	23.6335	23.045	24.0829	22.8238	MRPL43	Q8N983	39S ribosomal protein L43, mitochondrial OS=Homo sapiens OX=9606 GN=MRPL43 PE=1 SV=1	4	41
23.7785	23.5793	23.5647	23.6548	23.8258	23.8035	23.4924	23.7968	23.8318	25.4195	23.76	24.1785	23.8562	23.827	24.1129	24.0126	23.8973	23.5683	23.7857	23.629	23.6243	26.6777	23.5129	23.6353	23.7516	24.1937	23.4477	23.5917	23.6376	23.8279	23.5425	23.6193	23.6852	23.6099	23.5319	24.236	23.4247	23.5388	23.5803	23.7834	24.0756	23.9167	23.6709	24.554	23.5372	MRPL44	Q9H9J2	39S ribosomal protein L44, mitochondrial OS=Homo sapiens OX=9606 GN=MRPL44 PE=1 SV=1	4	41
23.6316	23.7094	23.5406	23.659	23.2079	23.1851	23.2104	23.3725	23.6236	25.3359	23.711	23.9907	23.4025	23.5735	23.8975	24.0361	23.5644	23.5054	23.5468	23.6805	23.6229	23.643	23.4616	23.541	23.5016	24.5375	23.1564	23.588	23.6675	23.879	23.7495	23.5148	23.577	23.7458	23.613	24.1304	23.556	23.7282	23.6431	23.8686	24.024	23.7832	23.6992	24.4833	23.6111	MRPL45	Q9BRJ2	39S ribosomal protein L45, mitochondrial OS=Homo sapiens OX=9606 GN=MRPL45 PE=1 SV=2	4	41
22.4059	22.3598	22.5531	22.1381	22.6014	22.38	22.111	22.3849	22.2073	23.8963	22.6299	22.9214	22.7219	22.2776	22.8289	22.6621	22.0249	22.2652	22.287	22.519	22.2259	22.4722	22.2974	22.4324	22.6284	23.21	21.9688	22.116	22.1299	22.5252	22.2802	22.2152	21.767	22.1098	22.0899	22.6609	22.2052	22.1635	22.3459	22.5526	22.7593	22.7176	21.7176	23.2471	22.0111	MRPL46	Q9H2W6	39S ribosomal protein L46, mitochondrial OS=Homo sapiens OX=9606 GN=MRPL46 PE=1 SV=1	4	41
22.3635	21.9931	22.2285	22.6646	22.1899	21.7941	21.9015	22.1332	22.582	24.2197	22.808	22.9918	22.3982	22.6763	22.8584	22.551	22.1024	22.4793	22.3654	22.405	22.1938	21.9557	21.7266	22.0445	22.3391	22.8719	21.4993	22.6122	22.0735	22.7538	21.9457	21.8988	22.3271	22.4468	22.2559	23.0692	22.2384	22.2601	22.6107	22.2267	22.9752	22.6757	22.426	23.749	22.0843	MRPL47	Q9HD33	39S ribosomal protein L47, mitochondrial OS=Homo sapiens OX=9606 GN=MRPL47 PE=1 SV=2	4	41
22.5975	21.6215	21.6195	22.2129	22.4083	22.0596	22.1671	22.2305	22.1132	23.6825	22.4825	22.5141	22.0566	22.0847	22.5684	22.7843	21.6818	22.3847	22.5659	21.6768	22.1922	21.9293	22.1606	21.7888	21.6278	23.0862	21.2867	21.644	21.3463	21.3156	22.5842	22.6942	21.2295	21.2872	21.7304	21.865	21.4185	21.4278	21.2686	21.4775	22.5662	21.7978	21.5232	22.8962	21.6424	MRPL48	Q96GC5	39S ribosomal protein L48, mitochondrial OS=Homo sapiens OX=9606 GN=MRPL48 PE=1 SV=2	4	41
23.4296	23.2071	23.1688	23.2414	23.4345	23.3756	23.2908	23.4158	23.5408	24.6049	23.5751	23.4176	23.5698	23.4492	23.6338	23.8433	23.5582	23.4292	23.4331	23.3765	23.3185	23.2925	23.4628	23.1684	23.3301	24.0777	23.1501	23.6794	23.3811	23.5498	23.4614	23.322	23.0887	23.3891	23.4864	23.8589	23.0926	23.4017	23.2787	23.5236	23.8312	23.792	23.5107	24.102	23.4021	MRPL49	Q13405	39S ribosomal protein L49, mitochondrial OS=Homo sapiens OX=9606 GN=MRPL49 PE=1 SV=1	4	41
22.9551	23.0662	22.8399	22.837	22.8633	22.9776	22.7124	22.9108	23.054	24.021	22.9484	23.2967	23.1151	22.9289	23.308	23.1065	23.0047	22.9088	23.0397	23.0622	22.9388	23.0285	22.6496	22.9964	22.789	23.5863	22.6405	22.8326	22.8088	23.1923	22.8758	22.9471	22.8126	22.7937	22.7203	23.3946	22.587	22.5924	23.014	22.5527	23.1781	22.9802	22.6072	23.0626	22.8281	MRPL50	Q8N5N7	39S ribosomal protein L50, mitochondrial OS=Homo sapiens OX=9606 GN=MRPL50 PE=1 SV=2	4	41
21.7018	21.9111	21.8862	21.2257	22.108	21.858	22.1183	22.1146	22.2679	23.2963	22.0625	21.9779	22.0964	22.0295	22.1389	22.1922	22.184	21.774	21.8175	21.8171	21.9699	21.785	21.8773	21.7036	21.9242	22.3309	21.6846	21.8135	21.6985	21.9984	21.6057	21.6709	21.5338	21.7193	21.7018	22.0174	21.0369	21.7308	21.6528	21.0128	22.0558	21.5838	21.6351	22.3	21.3922	MRPL53	Q96EL3	39S ribosomal protein L53, mitochondrial OS=Homo sapiens OX=9606 GN=MRPL53 PE=1 SV=1	4	41
20.4402	20.4013	20.8007	20.513	20.6297	20.3079	20.252	20.5578	20.1088	21.3432	20.3326	20.3263	19.9604	20.1371	20.3718	20.7263	20.0646	20.1724	19.8803	19.9611	20.4971	20.8463	20.5873	20.6155	19.8486	19.8619	20.157	20.2101	19.9949	20.0081	20.4574	19.977	20.0862	19.9596	20.781	20.8036	19.7586	19.9022	19.7292	20.6358	19.9738	19.8812	19.9524	NaN	19.7889	MRPL54	Q6P161	39S ribosomal protein L54, mitochondrial OS=Homo sapiens OX=9606 GN=MRPL54 PE=1 SV=1	4	40
20.6141	20.691	20.8805	20.6412	20.9814	21.944	20.7537	20.5227	21.9876	22.4457	22.0906	20.8785	20.5927	20.8238	21.0777	21.1318	20.6756	20.4765	20.5501	21.1377	21.1767	20.7544	20.7419	20.766	21.0412	23.1849	20.5796	22.6954	20.3911	20.548	20.4267	20.7263	20.6664	21.1687	20.8307	20.7672	20.5434	20.7927	20.701	20.8831	21.132	21.1742	20.826	21.226	21.1446	MRPL55	Q7Z7F7	39S ribosomal protein L55, mitochondrial OS=Homo sapiens OX=9606 GN=MRPL55 PE=1 SV=1	4	41
25.0313	24.6497	24.9064	24.5209	25.0739	24.7833	24.5642	24.8133	25.228	25.473	25.0842	24.9033	25.222	25.0408	25.0498	25.1422	24.9679	24.6701	24.7156	24.9668	24.9599	24.9428	24.7543	24.9018	24.7924	24.9917	24.3754	24.6756	24.7541	25.2501	24.5245	24.7593	24.8641	24.4415	24.5391	25.1522	24.7792	24.6446	25.0706	25.0989	25.316	24.7507	24.7231	24.7606	24.4926	MRPL9	Q9BYD2	39S ribosomal protein L9, mitochondrial OS=Homo sapiens OX=9606 GN=MRPL9 PE=1 SV=2	4	41
21.6205	22.8461	22.8186	22.0282	22.8125	23.1197	22.8329	22.9022	23.0306	23.4781	23.001	23.1686	23.4679	23.503	23.3216	22.8122	23.0712	22.4765	23.4809	23.6125	21.793	22.7493	22.5277	22.0957	21.5199	22.979	21.7642	22.7569	22.3273	22.4735	21.5631	21.5505	22.8358	22.1238	22.9335	22.3159	21.9376	22.9755	22.5218	23.1713	21.5623	21.8621	21.7142	22.9269	23.0062	MRPS18A	Q9NVS2	39S ribosomal protein S18a, mitochondrial OS=Homo sapiens OX=9606 GN=MRPS18A PE=1 SV=1	4	41
21.5812	21.9304	22.1784	22.6321	22.8469	22.628	22.064	22.2543	21.6365	24.0788	22.2966	22.2801	22.2076	22.3577	22.6646	22.8486	22.0935	22.3621	22.046	22.1755	21.8845	21.9797	21.328	22.4117	21.7672	22.5665	22.3633	22.3873	22.2094	22.4494	22.639	22.1776	22.5365	22.1866	22.0343	23.0654	21.9959	22.0593	21.8368	22.3762	21.9677	22.7733	22.2416	23.118	21.8902	MRPS30	Q9NP92	39S ribosomal protein S30, mitochondrial OS=Homo sapiens OX=9606 GN=MRPS30 PE=1 SV=2	4	41
23.4751	23.4171	23.4005	23.8937	23.3594	23.8607	24.0246	23.893	23.5344	24.5203	23.7833	23.7175	23.801	23.215	24.0337	23.9099	23.8558	23.5404	23.7052	23.3556	23.4065	23.7596	23.7833	23.9442	23.5994	24.3175	24.804	24.2503	24.1533	23.9896	23.6671	24.2157	24.4237	24.2045	24.0339	24.2363	23.8479	24.0434	24.2395	23.7298	24.1012	24.1188	23.6094	24.5681	24.1028	EBP	Q15125	3-beta-hydroxysteroid-Delta(8),Delta(7)-isomerase OS=Homo sapiens OX=9606 GN=EBP PE=1 SV=3	4	41
17.6517	17.4434	17.5128	17.5412	19.6422	17.5128	16.8309	17.4496	17.846	22.2967	17.6736	17.6137	17.7486	17.6369	19.9561	18.2406	19.0016	18.2107	17.6692	17.5145	18.4904	17.0435	16.965	18.7814	19.1389	19.466	18.8015	19.4818	19.2115	18.7121	17.7901	17.5114	18.5486	19.0149	17.1906	18.6164	17.6186	16.7721	17.5078	18.3425	17.8163	19.4985	18.5871	19.9355	18.3239	AGMAT	Q9BSE5	Agmatinase, mitochondrial OS=Homo sapiens OX=9606 GN=AGMAT PE=1 SV=2	4	41
26.3262	26.1248	26.3278	26.1682	26.5873	26.3067	26.2349	26.1482	26.1857	27.9163	26.3558	26.7444	26.4681	26.3908	26.954	26.7238	26.2716	26.2855	26.2573	26.359	26.2323	26.4479	26.1744	26.2548	26.4778	27.2552	26.1708	26.4387	26.35	26.3459	26.3579	26.4805	26.5919	26.5115	26.3867	27.0465	26.4071	26.4444	26.1706	26.5953	26.9168	27.3382	26.4312	27.8904	26.3807	HSD17B10	Q99714	3-hydroxyacyl-CoA dehydrogenase type-2 OS=Homo sapiens OX=9606 GN=HSD17B10 PE=1 SV=3	4	41
24.2737	24.2591	24.48	24.2711	24.1618	24.2641	24.174	24.3978	24.2709	24.4419	24.3745	23.9398	24.3332	24.1873	24.0907	24.3742	24.1674	23.906	24.1058	24.1799	24.5584	24.3501	24.424	24.3989	24.4762	24.8659	24.2393	24.394	24.228	24.0827	24.1935	24.4782	23.9087	23.9391	24.1271	24.6555	24.281	24.2092	24.0294	24.1935	24.4729	24.6165	24.1407	23.5387	24.6413	BDH2	Q9BUT1	3-hydroxybutyrate dehydrogenase type 2 OS=Homo sapiens OX=9606 GN=BDH2 PE=1 SV=2	4	41
24.623	24.6548	24.6468	24.0305	24.7608	24.5574	24.6389	24.5522	24.7898	25.4302	24.6916	25.2079	24.7156	24.6206	24.8976	24.7719	24.7061	24.6082	24.7542	24.4701	24.6408	24.8326	24.4773	24.7191	24.82	25.1753	24.3556	24.6452	24.3781	24.6497	24.5599	24.7117	24.5407	24.7342	24.4975	24.9251	24.4297	24.6243	24.3229	24.7731	25.0999	25.0345	24.3906	25.3568	24.5368	HIBADH	P31937	3-hydroxyisobutyrate dehydrogenase, mitochondrial OS=Homo sapiens OX=9606 GN=HIBADH PE=1 SV=2	4	41
23.9428	23.5756	23.7187	23.5843	25.0222	24.1698	23.9786	24.2922	24.195	25.9306	24.1941	24.8309	24.5793	24.3435	24.9389	24.3032	24.3421	24.1654	24.1875	24.0414	24.0798	24.441	23.8709	24.2398	24.1855	24.7264	23.9562	24.2383	24.103	24.1392	24.0656	24.1362	24.1811	24.1375	24.0397	24.6588	24.1265	24.1934	24.0881	24.7608	24.4266	25.2693	24.1919	24.9392	24.256	HIBCH	Q6NVY1	3-hydroxyisobutyryl-CoA hydrolase, mitochondrial OS=Homo sapiens OX=9606 GN=HIBCH PE=1 SV=2	4	41
26.1361	25.9935	26.1719	26.1927	27.1041	26.4367	26.1481	26.1753	26.1753	28.6968	26.328	26.9147	26.185	26.6427	27.2891	26.8341	26.4335	26.1124	26.0795	26.4392	26.1375	26.3215	26.0585	26.2232	26.3901	27.5036	26.1565	26.6321	26.3135	26.5299	26.572	26.2833	26.6434	26.4326	26.3388	26.7017	26.3752	26.2688	25.9172	26.9777	26.7331	27.3656	26.8989	28.0455	26.111	ACAA2	P42765	3-ketoacyl-CoA thiolase, mitochondrial OS=Homo sapiens OX=9606 GN=ACAA2 PE=1 SV=2	4	41
25.4622	25.5062	25.4539	25.4067	25.5784	25.6476	25.5809	25.5191	25.5203	26.5895	25.5933	25.8106	25.8557	25.5631	25.8599	25.9383	25.5554	25.4738	25.4274	25.5202	25.6236	25.3478	25.635	25.6868	25.6119	26.389	25.585	25.4413	25.3788	25.6052	25.4727	25.3026	25.5644	25.4625	25.3667	25.7415	25.4444	25.3492	25.3968	25.3409	25.7974	25.8573	25.3527	26.7502	25.3223	ACAA1	P09110	3-ketoacyl-CoA thiolase, peroxisomal OS=Homo sapiens OX=9606 GN=ACAA1 PE=1 SV=2	4	41
24.0509	24.2433	24.0348	24.072	24.0334	23.9177	24.1091	24.0413	23.7615	24.1772	23.8154	24.1352	24.0299	23.9324	24.1593	24.0642	23.8269	24.1324	23.8494	23.994	24.2526	24.2319	24.2572	24.229	24.2675	24.5851	24.4522	24.0049	24.0909	24.1934	24.2755	24.1364	24.0152	23.9043	24.3047	24.3868	24.4455	24.1589	24.1165	24.1493	24.2168	24.5652	24.2113	24.1872	24.0551	KDSR	Q06136	3-ketodihydrosphingosine reductase OS=Homo sapiens OX=9606 GN=KDSR PE=1 SV=1	4	41
19.6321	19.9498	NaN	18.3159	19.8346	19.0006	20.6086	20.075	19.6631	20.6692	20.1792	20.236	19.886	18.4871	20.4314	20.532	18.9689	20.4589	19.8632	18.4083	19.9578	18.6963	18.9274	20.1296	18.6404	20.1886	20.5046	19.5142	20.2769	20.001	20.01	19.9346	20.3665	20.3879	20.1831	19.8946	19.4493	19.8142	19.9993	18.7903	19.8736	20.3453	18.4665	18.8024	19.6096	HSD17B7	P56937	3-keto-steroid reductase/17-beta-hydroxysteroid dehydrogenase 7 OS=Homo sapiens OX=9606 GN=HSD17B7 PE=1 SV=1	3	41
25.2286	25.0121	25.3131	24.9803	25.3868	25.3228	24.9652	25.2303	25.2621	25.3902	25.2574	25.5335	25.5896	25.2259	25.6094	25.1416	25.2863	25.4331	25.2481	25.0899	25.367	25.5252	25.2332	25.0125	25.0596	25.1583	25.1756	24.9752	25.4701	25.677	25.1876	25.5114	25.2286	24.9495	25.5421	24.8954	25.3098	25.1321	25.4895	25.3371	25.3701	25.4458	25.0628	25.4878	25.6848	MPST	P25325	3-mercaptopyruvate sulfurtransferase OS=Homo sapiens OX=9606 GN=MPST PE=1 SV=3	4	41
14.4344	17.626	15.8887	18.8664	22.53	21.5211	19.5814	17.4628	18.6329	23.7764	14.5103	22.9735	22.6844	19.5973	15.6794	13.6498	17.6531	20.9059	19.9473	17.9265	19.8121	19.5866	20.6814	20.012	20.6959	13.6804	21.7854	23.5108	22.5753	19.1424	21.5048	15.3237	21.9405	21.1764	20.968	21.8756	15.3407	19.107	21.0894	21.8099	22.0453	23.8094	19.2612	23.5049	15.0408	ERAP2	Q6P179	Endoplasmic reticulum aminopeptidase 2 OS=Homo sapiens OX=9606 GN=ERAP2 PE=1 SV=2	4	41
23.0285	23.2357	23.2556	22.9683	22.9594	22.6209	23.0313	22.9182	22.9304	22.7039	23.0031	23.3564	22.8711	22.8068	23.2493	23.0467	23.1433	22.8028	22.9836	23.1661	23.3076	23.3245	23.4156	23.358	23.1638	22.7933	23.2869	23.1209	23.1807	23.192	22.9806	23.1107	23.1468	23.101	23.0447	23.0241	23.2169	23.0886	22.9224	23.1989	23.1136	23.1409	23.3395	22.0256	22.977	PDPK1	O15530	3-phosphoinositide-dependent protein kinase 1 OS=Homo sapiens OX=9606 GN=PDPK1 PE=1 SV=1	4	41
20.7996	21.1937	20.8957	20.843	21.024	21.535	20.9689	21.3301	21.2618	21.0365	21.392	21.093	21.6264	20.989	21.3915	21.4284	21.1569	21.1297	21.226	21.8832	20.9158	21.3342	21.3471	21.1315	20.926	20.5858	21.273	21.1992	21.1113	21.2946	21.017	20.8143	21.2888	21.1553	20.8579	21.0774	21.0003	20.4352	21.3586	20.8491	21.2911	21.2179	21.0728	20.2317	21.1227	F8A1;F8A2;F8A3	P23610	40-kDa huntingtin-associated protein OS=Homo sapiens OX=9606 GN=F8A1 PE=1 SV=2	4	41
27.7595	27.549	27.6999	27.4173	27.6618	27.3299	27.7572	27.7463	27.8606	27.493	27.6177	27.5146	27.8455	27.7685	27.7083	27.6971	27.7565	27.7182	27.8179	27.6592	27.7789	27.712	27.5	27.6785	27.3746	27.5691	27.8125	27.3722	27.5316	28.1386	27.6795	27.4845	27.589	27.5886	27.605	27.4816	27.5908	27.6252	28.0725	27.6444	28.0453	27.4511	27.6222	26.6905	27.7494	RPS10	P46783	40S ribosomal protein S10 OS=Homo sapiens OX=9606 GN=RPS10 PE=1 SV=1	4	41
28.4779	28.1475	28.0847	28.3274	28.5396	28.3361	28.2055	28.338	28.3073	28.4702	28.269	28.2415	28.2231	28.3038	28.2749	28.2452	28.2632	28.3405	28.3095	28.2557	28.2149	28.2895	28.2442	28.1755	28.1532	28.2024	28.3271	28.3793	28.4094	28.2939	28.3157	28.3648	28.2979	28.2858	28.3741	28.4083	28.3301	28.381	28.1341	28.4265	28.2635	28.399	28.3358	27.7979	28.3627	RPS11	P62280	40S ribosomal protein S11 OS=Homo sapiens OX=9606 GN=RPS11 PE=1 SV=3	4	41
27.4378	27.3696	27.693	27.2165	27.3723	27.3816	27.4806	27.4205	27.5277	27.2284	27.4031	27.5595	27.2903	27.324	27.2926	27.5324	27.4238	27.5249	27.4838	27.3486	27.4326	27.5658	27.5631	27.6294	27.5056	27.3062	27.5511	27.4872	27.4654	27.3478	27.4154	27.4452	27.3572	27.6227	27.3793	27.3576	27.3922	27.2942	27.1774	27.1597	27.238	27.2655	27.3078	26.1557	27.1996	RPS12	P25398	40S ribosomal protein S12 OS=Homo sapiens OX=9606 GN=RPS12 PE=1 SV=3	4	41
28.4907	28.3708	28.4259	28.0755	28.5732	28.4412	28.56	28.6054	28.5831	28.389	28.4701	28.4125	28.5372	28.3556	28.3127	28.5617	28.3526	28.414	28.3737	28.3045	28.5925	28.5169	28.4114	28.4898	28.5165	28.3261	28.2509	28.3057	28.3171	28.5868	28.3481	28.2592	28.0771	28.2122	28.403	28.2645	28.2255	28.2092	28.3359	28.2562	28.5782	28.1343	28.2676	27.6933	28.3244	RPS13	P62277	40S ribosomal protein S13 OS=Homo sapiens OX=9606 GN=RPS13 PE=1 SV=2	4	41
27.1138	27.2369	27.0582	27.3283	27.4251	27.1934	27.286	27.2662	27.3362	26.9262	27.1584	27.2465	27.2547	27.2355	27.2184	27.0124	27.0152	27.2859	27.2689	27.2069	27.1338	27.1476	27.036	27.1727	27.0904	27.0752	27.2878	27.3859	27.2018	27.1182	27.2729	27.2516	27.362	27.3928	27.406	27.2755	27.4939	27.3793	27.1679	27.5532	27.267	27.3371	27.2919	26.6289	27.3906	RPS14	P62263	40S ribosomal protein S14 OS=Homo sapiens OX=9606 GN=RPS14 PE=1 SV=3	4	41
26.5416	26.4225	26.6127	26.3121	26.1511	26.5876	26.8069	27.1456	26.321	26.3816	26.8688	26.1195	26.1674	26.6181	26.6833	26.8631	26.3997	26.2056	26.7554	26.5352	26.8676	26.2934	26.7136	26.9692	26.5861	26.2057	26.6727	26.8145	26.7848	26.9538	26.3074	26.6375	26.7036	26.4756	26.2236	26.4456	26.7153	26.5531	26.4649	26.6053	26.3445	26.1704	26.1048	24.575	26.746	RPS15	P62841	40S ribosomal protein S15 OS=Homo sapiens OX=9606 GN=RPS15 PE=1 SV=2	4	41
28.7516	28.7766	28.7122	28.728	28.8845	28.7211	28.7596	28.8784	28.9015	28.7781	28.8384	28.7785	28.5515	28.7542	28.8576	28.7789	28.8338	28.7947	28.8339	28.6381	28.7241	28.9194	28.7948	28.8907	28.9263	28.8917	28.8211	28.6821	28.7553	28.6143	28.6736	28.8234	28.6081	28.7417	28.7262	28.7638	28.7854	28.7312	28.6165	28.8319	28.8087	28.8871	28.7485	28.3902	28.8204	RPS15A	P62244	40S ribosomal protein S15a OS=Homo sapiens OX=9606 GN=RPS15A PE=1 SV=2	4	41
28.9935	28.8959	28.8491	28.898	29.1737	28.7946	28.9216	28.9722	29.0632	28.8355	28.9562	28.9634	28.9603	28.989	28.9184	28.9123	28.9548	28.8813	28.9292	28.8533	28.8542	28.9345	28.8355	29.0002	29.0302	29.0101	29.0492	28.9662	29.0328	28.8429	28.8323	28.9089	28.8299	28.9381	28.8703	28.8612	28.799	28.8632	28.7682	28.993	28.8104	28.8543	28.8798	28.4323	28.9599	RPS16	P62249	40S ribosomal protein S16 OS=Homo sapiens OX=9606 GN=RPS16 PE=1 SV=2	4	41
27.7168	27.7563	27.4736	27.4936	28.0226	27.8948	27.8023	27.8005	27.7914	27.4037	27.6678	27.7252	28.0521	27.8543	27.7727	27.8114	27.8633	27.7921	27.6517	27.9609	27.7869	27.777	27.7956	27.7142	27.4299	27.3541	27.9045	27.8101	27.7242	27.9214	27.8605	27.7975	27.7718	27.8506	27.8753	27.8668	27.7653	27.6936	27.8873	27.8457	27.7519	27.6003	27.841	26.7391	27.8319	RPS17	P08708	40S ribosomal protein S17 OS=Homo sapiens OX=9606 GN=RPS17 PE=1 SV=2	4	41
28.7905	28.6862	28.6861	28.7499	28.8436	28.6371	28.7513	28.7432	28.7577	28.6329	28.5656	28.6904	28.645	28.7161	28.6712	28.71	28.7272	28.8341	28.8921	28.7881	28.7877	28.7767	28.7867	28.7671	28.6874	28.6476	28.7497	28.7501	28.7908	28.7237	28.7533	28.7906	28.7557	28.8298	28.8026	28.7321	28.7352	28.741	28.7429	28.8771	28.7661	28.7422	28.7109	28.1648	28.8069	RPS18	P62269	40S ribosomal protein S18 OS=Homo sapiens OX=9606 GN=RPS18 PE=1 SV=3	4	41
28.0475	28.2136	27.9894	28.1033	28.2668	28.1771	28.2141	28.3783	28.3246	27.8902	28.211	28.1189	28.1292	28.1509	28.0281	28.2119	28.2078	28.1622	28.068	28.118	28.2814	28.2862	28.3088	28.2354	28.0417	27.9893	28.2576	28.1621	28.1656	28.1357	28.2309	28.269	28.3109	28.0166	28.2951	28.1757	28.1146	28.244	28.1873	28.409	28.1666	28.0095	28.1851	27.2058	28.4111	RPS19	P39019	40S ribosomal protein S19 OS=Homo sapiens OX=9606 GN=RPS19 PE=1 SV=2	4	41
28.314	28.2555	28.3665	28.1813	28.7878	28.4353	28.4877	28.6205	28.5792	28.1304	28.4424	28.4474	28.5425	28.4984	28.3922	28.5285	28.4791	28.4062	28.3742	28.4211	28.4695	28.4637	28.4493	28.4495	28.4338	28.1249	28.4458	28.4494	28.5204	28.6943	28.5258	28.5278	28.2998	28.4037	28.4814	28.4566	28.6361	28.5513	28.4994	28.6472	28.4928	28.4256	28.5756	27.3621	28.5298	RPS2	P15880	40S ribosomal protein S2 OS=Homo sapiens OX=9606 GN=RPS2 PE=1 SV=2	4	41
28.034	27.9026	27.9429	27.8895	28.083	27.8515	27.9487	27.9202	27.9602	27.7318	28.0086	27.8987	27.9082	28.0017	27.9049	27.9976	27.9677	27.922	28.0052	27.9381	27.9284	27.9385	27.7672	27.8542	27.8169	27.7554	28	28.0176	28.1392	27.8284	27.7328	27.958	27.7579	27.9199	27.9122	27.7824	27.9173	27.6668	27.7014	27.8891	27.6556	27.5916	27.7915	26.8988	27.7826	RPS20	P60866	40S ribosomal protein S20 OS=Homo sapiens OX=9606 GN=RPS20 PE=1 SV=1	4	41
26.5201	26.163	26.3295	26.1715	26.6551	26.4594	26.4804	26.5219	26.4667	26.0555	26.253	26.2549	26.4001	26.3627	26.1164	26.3965	26.2213	26.4688	26.4227	26.3709	26.4901	26.4327	26.3151	26.4034	26.3742	26.2336	26.2125	26.6169	26.4113	26.3343	26.3776	26.4193	26.1726	26.3055	26.4271	26.2409	26.4307	26.2877	26.1467	26.3817	26.4619	26.3145	26.3769	25.5129	26.3306	RPS21	P63220	40S ribosomal protein S21 OS=Homo sapiens OX=9606 GN=RPS21 PE=1 SV=1	4	41
25.993	25.7808	25.7559	25.8557	26.1675	25.9609	25.9439	26.071	26.0688	25.7994	25.9037	25.8299	25.9964	25.8096	25.7748	25.9195	25.6687	25.888	25.8204	25.8269	25.9207	25.9358	25.7954	25.8763	25.9479	25.8072	25.961	26.1404	26.1118	25.9716	25.9205	25.852	25.9392	25.923	25.9986	25.7796	25.904	25.9653	25.8619	26.0754	25.9757	25.7972	25.9359	24.7403	26.0372	RPS23	P62266	40S ribosomal protein S23 OS=Homo sapiens OX=9606 GN=RPS23 PE=1 SV=3	4	41
25.5815	25.5482	25.6936	25.4658	25.8676	25.5345	25.6229	25.8	25.6367	25.2172	25.3995	25.6895	25.4695	25.2188	25.2415	25.8391	25.4089	25.6031	25.5364	25.7807	25.6621	25.7917	25.9614	25.8072	25.8577	25.5374	25.6463	25.6893	25.7679	25.8299	25.7328	25.8983	25.6752	25.647	25.9667	25.7675	25.884	25.6851	25.4023	25.8484	25.6728	25.489	25.8146	23.8797	25.8228	RPS24	P62847	40S ribosomal protein S24 OS=Homo sapiens OX=9606 GN=RPS24 PE=1 SV=1	4	41
28.4633	28.3282	28.3221	28.2172	28.4971	28.3221	28.4174	28.4331	28.4561	28.0234	28.3506	28.2972	28.2902	28.3034	28.3736	28.4943	28.4377	28.386	28.4555	28.4135	28.4051	28.5178	28.3767	28.5017	28.3435	28.2627	28.2847	28.3062	28.3044	28.2677	28.2589	28.319	28.269	28.3564	28.2294	28.221	28.2965	28.1764	28.0399	28.2286	28.1258	28.0684	28.1541	27.2464	28.2121	RPS25	P62851	40S ribosomal protein S25 OS=Homo sapiens OX=9606 GN=RPS25 PE=1 SV=1	4	41
27.0812	27.003	26.9398	27.1437	27.5253	27.1225	27.2641	27.3599	27.3848	26.9357	27.2019	27.1225	27.2052	27.1731	27.1769	27.1094	27.1539	27.2667	27.2131	27.1572	27.1243	26.9261	26.9895	27.0314	26.8882	26.808	27.3897	27.0851	27.2569	27.1573	27.1433	27.2636	27.1525	27.2935	27.1805	27.1015	27.2188	27.0903	27.266	27.2173	27.0738	27.0665	27.1748	26.065	27.3051	RPS26	P62854	40S ribosomal protein S26 OS=Homo sapiens OX=9606 GN=RPS26 PE=1 SV=3	4	41
26.1699	25.8763	25.9341	26.0543	26.2646	25.872	25.8049	25.9182	26.0687	26.2688	25.9816	25.9089	26.0473	26.1347	25.9653	25.9368	25.9339	26.0566	26.121	26.0839	25.9089	25.8572	25.9431	25.805	25.8023	25.9042	26.0448	26.1359	26.0903	25.8269	25.9797	26.0902	26.0032	26.2069	26.0303	26.1369	26.1231	26.0747	26.0032	26.0737	26.0705	25.9695	26.1867	25.7953	26.104	RPS27	P42677	40S ribosomal protein S27 OS=Homo sapiens OX=9606 GN=RPS27 PE=1 SV=3	4	41
26.2563	26.1379	26.1358	25.9396	26.1431	26.1186	26.056	26.2299	26.5558	25.8367	26.2306	25.9798	25.9867	26.1464	26.125	26.3539	26.0911	26.2668	26.0693	26.2244	26.3074	26.2537	26.3948	26.3745	26.0326	26.1131	26.1382	26.3373	26.2944	26.1716	26.2335	26.3009	26.2077	26.1069	26.5399	26.3988	26.2424	26.2826	26.0244	26.3224	26.2254	26.4014	26.3054	25.3283	26.3895	RPS27L	Q71UM5	40S ribosomal protein S27-like OS=Homo sapiens OX=9606 GN=RPS27L PE=1 SV=3	4	41
25.5284	25.238	25.3135	25.5699	25.4911	25.4334	25.5922	25.3984	25.5952	25.0711	25.466	25.3346	25.4053	25.4054	25.4709	25.4467	25.4904	25.6248	25.6389	25.3178	25.4886	25.4124	25.4284	25.3878	25.1207	25.0052	25.6152	25.691	25.4935	25.292	25.4283	25.5238	25.2153	25.331	25.5644	25.3861	25.4329	25.423	25.3381	25.3856	25.2476	25.3663	25.2557	24.6111	25.4866	RPS28	P62857	40S ribosomal protein S28 OS=Homo sapiens OX=9606 GN=RPS28 PE=1 SV=1	4	41
25.7409	25.6955	25.4806	25.6155	25.8933	25.8374	25.9423	25.9096	25.9823	25.5532	25.8242	25.8029	25.735	25.6699	25.5181	25.6624	25.6806	25.5327	25.8108	25.5961	25.6299	25.3453	25.4785	25.6873	25.7818	25.6992	25.9374	25.6188	25.6407	25.6231	25.4555	25.2056	25.341	25.5248	25.4038	25.088	25.2059	25.2822	25.3048	25.3519	25.1121	24.9893	25.0166	24.6785	25.6522	RPS29	P62273	40S ribosomal protein S29 OS=Homo sapiens OX=9606 GN=RPS29 PE=1 SV=2	4	41
29.9786	30.0644	30.04	29.9651	30.1759	29.8753	30.0323	30.0778	30.0042	29.8491	29.9855	30.0694	29.9773	29.9855	29.98	29.9482	29.9702	29.9574	29.9861	29.8598	30.0251	30.0546	30.0149	30.01	29.9973	29.8928	30.1173	29.9941	30.0843	29.8851	29.9442	30.0163	29.8703	30.0448	30.0172	30.0242	30.0293	29.9657	29.9063	30.0855	30.0293	30.0133	30.0047	29.5661	29.9688	RPS3	P23396	40S ribosomal protein S3 OS=Homo sapiens OX=9606 GN=RPS3 PE=1 SV=2	4	41
25.0534	25.5199	25.616	25.0474	24.826	24.9029	25.0481	24.9955	25.1431	24.2483	25.0276	25.2177	25.4607	24.9797	24.6107	25.1281	25.0387	24.9327	24.8888	25.0603	25.5418	25.3411	25.3845	25.562	25.5942	24.9946	21.6393	24.9281	25.0772	25.1615	25.1061	25.1156	24.8977	24.8563	25.179	24.8595	24.8603	25.0533	24.9786	25.1424	24.8116	24.8791	24.9149	19.9731	25.1165	FAU	P62861	40S ribosomal protein S30 OS=Homo sapiens OX=9606 GN=FAU PE=1 SV=1	4	41
29.1452	29.1931	29.1764	29.199	29.3842	29.1478	29.2424	29.2817	29.2967	29.1036	29.2448	29.1177	29.2246	29.2137	29.1131	29.2283	29.1542	29.241	29.168	29.2316	29.1608	29.2552	29.1376	29.1015	29.1134	28.8709	29.2772	29.2593	29.1965	29.1482	29.2097	29.1951	29.1225	29.1992	29.2624	29.1643	29.1475	29.1566	29.0911	29.2234	29.1095	29.1145	29.0891	28.5713	29.1909	RPS3A	P61247	40S ribosomal protein S3a OS=Homo sapiens OX=9606 GN=RPS3A PE=1 SV=2	4	41
29.3083	29.226	29.2035	29.2751	29.4666	29.2414	29.263	29.3566	29.402	28.9398	29.4027	29.3254	29.2132	29.2229	29.2683	29.1914	29.2173	29.3534	29.3541	29.2117	29.1564	29.3661	29.2852	29.291	29.2731	29.1919	29.2836	29.33	29.2964	29.1647	29.2342	29.2204	29.1396	29.2697	29.2297	29.2617	29.1956	29.2228	29.0843	29.3372	29.1257	29.2196	29.1613	28.4813	29.1899	RPS4X	P62701	40S ribosomal protein S4, X isoform OS=Homo sapiens OX=9606 GN=RPS4X PE=1 SV=2	4	41
NaN	18.8282	NaN	NaN	20.4035	NaN	NaN	NaN	NaN	18.873	NaN	NaN	19.3084	19.768	20.343	NaN	NaN	NaN	NaN	NaN	NaN	18.9912	NaN	18.9513	NaN	NaN	NaN	NaN	NaN	18.6256	19.704	19.3606	NaN	20.2487	NaN	NaN	NaN	19.1886	NaN	19.9666	NaN	19.3045	NaN	NaN	18.1753	RPS4Y1	P22090	40S ribosomal protein S4, Y isoform 1 OS=Homo sapiens OX=9606 GN=RPS4Y1 PE=1 SV=2	1	15
27.6416	27.6201	27.6782	27.9106	28.0232	27.8138	27.7474	27.8644	28.0463	27.6952	27.9266	27.728	27.8406	27.8452	27.8364	27.6207	27.876	27.706	27.7917	27.7653	27.6644	27.6344	27.8101	27.728	27.7428	27.5663	27.9796	28.1003	27.9398	27.8339	27.8243	27.7597	27.8229	27.9781	27.6664	27.7713	27.6849	27.7287	27.754	27.8213	27.8088	27.6995	27.7762	27.3198	27.7425	RPS5	P46782	40S ribosomal protein S5 OS=Homo sapiens OX=9606 GN=RPS5 PE=1 SV=4	4	41
27.0806	27.6965	27.8048	27.6095	27.9956	27.8409	27.7726	27.869	27.8814	27.1712	27.767	27.6882	27.7775	27.791	27.6741	27.758	27.8845	27.9349	27.7894	27.7701	27.82	27.8966	27.6942	27.5613	27.7929	27.1828	27.609	27.7258	27.744	27.8357	27.6514	27.586	27.2795	27.5769	27.8627	27.3562	27.8415	27.6444	27.7621	27.8491	27.5126	27.3444	27.7131	26.1268	27.8865	RPS6	P62753	40S ribosomal protein S6 OS=Homo sapiens OX=9606 GN=RPS6 PE=1 SV=1	4	41
28.3857	28.1876	28.2108	28.1959	28.4548	28.3411	28.3905	28.3715	28.2628	28.1902	28.2761	28.32	28.412	28.3707	28.2768	28.3735	28.2673	28.3955	28.4159	28.4538	28.347	28.3133	28.3529	28.2907	28.1528	28.0215	28.4956	28.276	28.4352	28.6249	28.4512	28.3459	28.303	28.3624	28.4571	28.3573	28.2616	28.2949	28.3685	28.3844	28.4946	28.2511	28.2698	27.3088	28.3578	RPS7	P62081	40S ribosomal protein S7 OS=Homo sapiens OX=9606 GN=RPS7 PE=1 SV=1	4	41
27.4813	27.3953	27.5057	27.406	28.0094	27.5569	27.7527	27.7884	27.8744	27.1513	27.6056	27.5836	27.7117	27.5493	27.4205	27.5279	27.547	27.6622	27.5445	27.4025	27.5405	27.4614	27.486	27.4915	27.4958	27.0826	27.6084	27.6372	27.6633	27.6181	27.6383	27.5905	27.5559	27.5614	27.7133	27.611	27.759	27.7745	27.6148	27.8677	27.5857	27.5276	27.6509	26.1847	27.8342	RPS8	P62241	40S ribosomal protein S8 OS=Homo sapiens OX=9606 GN=RPS8 PE=1 SV=2	4	41
28.4499	28.5118	28.3359	28.4131	29.0303	28.5209	28.7189	28.8497	28.8742	28.7533	28.8298	28.7637	28.7789	28.8037	29.0606	28.8054	28.8978	28.648	28.9057	28.7356	28.6823	28.8398	28.686	28.868	28.8287	28.6432	28.9675	28.9089	28.9338	28.8315	28.6902	28.8299	28.6026	28.7264	28.7708	28.6842	28.6993	28.6094	28.464	28.9101	28.5824	28.5038	28.6429	28.1929	28.7508	RPS9	P46781	40S ribosomal protein S9 OS=Homo sapiens OX=9606 GN=RPS9 PE=1 SV=3	4	41
28.9177	29.0938	29.1589	28.9307	29.0937	29.0207	29.0803	29.0726	28.8555	28.4243	28.8507	29.0819	28.8848	28.9505	28.9575	29.0354	29.0401	29.0437	28.9498	28.9277	29.0974	29.0796	29.1121	29.0537	29.1644	28.6906	29.0368	28.892	29.0228	28.9836	29.0012	28.8735	28.6382	29.0824	29.06	28.9329	29.0621	28.9058	29.0515	29.0073	29.0235	28.877	28.9747	27.867	28.9215	RPSA	P08865	40S ribosomal protein SA OS=Homo sapiens OX=9606 GN=RPSA PE=1 SV=4	4	41
25.7024	25.7043	25.7032	25.6497	25.4656	25.6709	25.7385	25.4972	25.6043	25.7638	25.6842	25.8978	25.4139	25.566	25.3727	25.8029	25.8067	25.7813	25.5924	25.5958	25.6856	25.6636	25.7597	25.8611	25.7763	25.9078	25.8708	25.7772	25.4763	25.5887	25.6267	25.7013	25.7204	25.5778	25.6967	25.9021	25.6858	25.7335	25.6481	25.5081	25.7694	25.8634	25.5293	25.7721	25.7641	SDF4	Q9BRK5	45 kDa calcium-binding protein OS=Homo sapiens OX=9606 GN=SDF4 PE=1 SV=1	4	41
20.9142	20.7871	20.7196	20.5017	20.4675	22.0271	21.6295	20.9763	20.7171	21.1507	21.1238	20.9329	20.8603	20.4278	21.1178	21.3075	21.0452	21.9231	21.0784	20.7964	21.1191	20.928	21.0714	20.9047	21.0466	21.2791	21.9146	20.7027	20.5793	20.8766	20.9747	21.0488	20.7847	21.125	21.0283	21.1999	21.0298	20.3607	21.3038	20.42	21.1912	21.1213	20.4814	20.4571	21.0389	ABAT	P80404	4-aminobutyrate aminotransferase, mitochondrial OS=Homo sapiens OX=9606 GN=ABAT PE=1 SV=3	4	41
23.2124	23.2327	23.33	22.8826	23.2698	23.2257	23.4369	23.2521	23.3631	23.3375	23.6125	23.6697	23.0714	23.2521	23.2243	23.5211	23.3962	23.5349	23.2539	22.7381	23.4948	23.4526	23.6962	23.7655	23.4482	23.4601	23.702	22.9665	23.1208	23.5183	23.2324	23.0878	23.28	23.3727	23.0122	23.4094	23.1237	22.7887	23.3158	22.9241	23.211	23.2676	23.1321	21.9497	23.401	PANK4	Q9NVE7	4'-phosphopantetheine phosphatase OS=Homo sapiens OX=9606 GN=PANK4 PE=1 SV=1	4	41
26.7772	26.7206	26.6663	26.8796	26.7049	26.8728	26.7923	26.663	26.8819	27.531	26.885	26.9752	26.9095	26.7788	26.9468	26.7451	26.9754	26.7778	26.724	26.7436	26.6631	26.7432	26.7018	26.7211	26.6594	26.9267	26.8731	26.8523	26.9372	26.9003	26.9313	26.9008	27.0647	27.0203	26.9525	26.8891	26.7691	26.7701	26.873	26.9197	26.9339	27.0296	26.9477	26.7448	26.6607	ALDH9A1	P49189	4-trimethylaminobutyraldehyde dehydrogenase OS=Homo sapiens OX=9606 GN=ALDH9A1 PE=1 SV=3	4	41
23.641	23.5081	23.8062	23.43	23.5202	23.6659	23.3896	23.8232	23.6707	23.2018	23.6832	23.833	23.7845	23.3774	23.7251	23.8745	23.709	23.6598	23.3866	23.8718	23.7195	23.7045	23.7612	23.707	23.913	23.7801	23.7592	23.4646	23.653	23.7545	23.6485	23.8113	23.3313	23.5653	23.4504	23.5384	23.8104	23.7151	23.7392	24.0298	23.5559	23.8674	23.4126	22.7351	23.446	NT5C	Q8TCD5	5'(3')-deoxyribonucleotidase, cytosolic type OS=Homo sapiens OX=9606 GN=NT5C PE=1 SV=2	4	41
25.3778	25.4064	25.4161	25.3676	24.7658	25.2256	25.333	24.911	25.2436	26.2954	24.9634	25.2295	25.3186	25.128	25.1067	25.8147	25.4356	25.5086	25.3853	25.2742	25.7869	25.424	25.4141	25.4848	25.4328	26.1388	25.0056	25.0954	25.0799	24.9338	25.0314	25.2512	25.2999	25.0296	25.1608	25.3464	25.246	25.0701	25.2731	25.1343	25.5915	25.2527	25.0031	24.3439	25.1339	PLD3	Q8IV08	5'-3' exonuclease PLD3 OS=Homo sapiens OX=9606 GN=PLD3 PE=1 SV=1	4	41
NaN	NaN	NaN	NaN	20.0053	18.3795	NaN	NaN	NaN	19.1019	NaN	17.5526	15.5025	17.368	19.6751	16.4619	NaN	15.4893	NaN	NaN	NaN	NaN	NaN	15.4511	NaN	NaN	NaN	18.1902	18.6279	NaN	15.1938	NaN	NaN	19.2459	NaN	NaN	NaN	NaN	NaN	18.0945	NaN	NaN	15.9007	NaN	15.1682	PLD4	Q96BZ4	5'-3' exonuclease PLD4 OS=Homo sapiens OX=9606 GN=PLD4 PE=2 SV=2	0	17
22.7323	22.7642	22.4068	22.1842	22.9451	23.3902	22.9265	23.3329	22.9	22.271	23.3553	23.3343	23.1531	22.8035	23.3861	22.6437	22.7777	22.5991	22.7049	22.5718	22.9472	22.6658	22.7835	23.0126	22.8981	22.3728	22.9785	22.5968	22.3693	22.4863	22.2203	21.7896	22.3875	22.5991	22.3556	22.6104	22.5378	22.2652	22.225	22.339	22.3502	22.5701	22.2178	20.4334	22.4539	XRN1	Q8IZH2	5'-3' exoribonuclease 1 OS=Homo sapiens OX=9606 GN=XRN1 PE=1 SV=1	4	41
24.4227	24.4336	24.3661	24.4049	24.5736	24.3214	24.5573	24.6364	24.3188	24.2127	24.6712	24.8289	24.4422	24.4025	24.4313	24.3627	24.5373	24.378	24.4793	24.3168	24.3225	24.4933	24.2146	24.3732	24.4262	24.7149	24.6435	24.2827	24.6294	24.4187	24.4017	24.4371	24.2817	24.6172	24.3126	24.316	24.2353	24.2908	24.5354	24.5775	24.474	24.4815	24.414	23.7073	24.7293	XRN2	Q9H0D6	5'-3' exoribonuclease 2 OS=Homo sapiens OX=9606 GN=XRN2 PE=1 SV=1	4	41
15.5649	15.0584	15.0237	15.4128	16.7072	15.6005	16.017	16.4402	16.045	20.0834	16.6346	19.5399	16.5605	15.6409	18.7551	15.9624	16.2602	15.8544	15.5435	16.4978	15.4625	16.0355	15.4292	15.7074	18.4773	20.7901	19.6494	15.8992	15.8398	16.5137	18.1952	15.4443	16.3232	19.5684	16.7822	15.9707	16.2957	16.0267	15.886	16.0798	NaN	19.6735	16.0272	18.9225	16.7443	APOBEC3B	Q9UH17	DNA dC->dU-editing enzyme APOBEC-3B OS=Homo sapiens OX=9606 GN=APOBEC3B PE=1 SV=1	4	40
24.4206	24.4544	24.4179	24.3998	24.3415	24.3178	24.4081	24.3303	24.3149	24.1391	24.3062	24.3154	24.2323	24.237	24.4065	24.3443	24.4982	24.3898	24.4227	24.3914	24.4907	24.532	24.2718	24.5729	24.4619	24.476	24.4354	24.3611	24.4032	24.2768	24.3661	24.5695	24.2661	24.4513	24.4313	24.3899	24.4313	24.3113	24.1284	24.4262	24.1827	24.3637	24.2839	23.353	24.4957	PRKAA1	Q13131	5'-AMP-activated protein kinase catalytic subunit alpha-1 OS=Homo sapiens OX=9606 GN=PRKAA1 PE=1 SV=4	4	41
21.9905	21.8722	22.2726	21.8059	21.6073	21.8512	21.5314	21.9725	21.8824	20.899	21.7632	22.4843	21.9538	21.5938	22.152	22.1572	22.32	22.0858	22.1617	22.2263	21.83	22.25	22.4608	22.1256	22.0435	21.7222	21.9874	21.8828	21.4931	22.4187	21.9512	22.1814	21.7704	22.212	22.1654	21.9618	21.9888	21.659	22.2872	21.9288	22.5831	22.0281	21.9817	19.7836	22.0476	PRKAB1	Q9Y478	5'-AMP-activated protein kinase subunit beta-1 OS=Homo sapiens OX=9606 GN=PRKAB1 PE=1 SV=4	4	41
19.8072	20.9623	19.776	18.913	18.8677	20.7453	19.2173	19.5493	20.5125	19.4114	20.2579	19.0763	20.7848	20.6616	21.0252	19.8681	20.4432	19.6595	20.6861	20.9762	21.255	19.885	19.925	19.7611	19.5037	19.4659	18.6944	18.7379	20.4938	20.8154	19.2156	19.1649	19.2156	19.0252	20.699	19.2454	19.3586	19.5341	21.3102	20.8083	20.7627	19.3336	20.3206	17.969	19.3402	PRKAB2	O43741	5'-AMP-activated protein kinase subunit beta-2 OS=Homo sapiens OX=9606 GN=PRKAB2 PE=1 SV=1	4	41
24.7243	24.7818	24.6769	24.5279	24.5683	24.4282	24.5961	24.608	24.7125	24.5174	24.7172	24.6194	24.6609	24.6058	24.6405	24.8588	24.8299	24.5061	24.6561	24.5685	24.8824	24.7848	24.7012	24.9701	24.933	24.62	24.6269	24.5214	24.6771	24.606	24.6402	24.5209	24.5452	24.614	24.619	24.606	24.6251	24.537	24.3573	24.4646	24.6515	24.5437	24.1892	23.8217	24.5195	PRKAG1	P54619	5'-AMP-activated protein kinase subunit gamma-1 OS=Homo sapiens OX=9606 GN=PRKAG1 PE=1 SV=1	4	41
NaN	18.1432	18.1143	17.7474	18.1731	17.6823	17.5625	18.4872	NaN	NaN	NaN	NaN	18.142	16.721	18.3639	17.8017	NaN	18.0407	18.0959	NaN	17.6879	NaN	18.003	NaN	18.4781	NaN	NaN	17.8537	18.0384	18.1898	18.0182	17.6429	NaN	17.9114	18.1943	17.4391	17.8681	NaN	17.468	18.506	17.2649	16.7477	NaN	NaN	18.6555	PRKAG2	Q9UGJ0	5'-AMP-activated protein kinase subunit gamma-2 OS=Homo sapiens OX=9606 GN=PRKAG2 PE=1 SV=1	3	27
19.9847	21.5012	19.9442	21.5595	21.1827	21.566	20.1305	20.1555	21.4874	18.2994	22.1823	21.2467	19.6173	21.2533	20.9052	20.8273	19.8881	21.3355	20.9434	21.7436	19.6815	22.2367	20.9637	20.146	20.806	20.9184	21.546	19.4032	20.9883	19.7119	19.3026	19.2298	19.9955	20.0135	21.3885	18.5268	21.7464	21.5776	21.7289	21.159	21.7304	21.1331	19.2368	21.8944	19.801	AZI2	Q9H6S1	5-azacytidine-induced protein 2 OS=Homo sapiens OX=9606 GN=AZI2 PE=1 SV=1	4	41
19.5883	NaN	22.2904	22.5183	22.0511	21.7877	21.8373	19.2498	21.0094	22.1818	18.7286	22.4202	21.7882	22.333	22.6458	22.373	21.2418	22.7426	21.5648	NaN	22.2406	22.689	17.7915	21.9642	22.4413	22.3485	21.9098	22.7179	19.7769	22.6913	20.0676	22.2266	21.336	22.0399	22.6445	20.7488	23.1479	22.5491	22.0718	19.9912	22.8985	22.7217	22.1271	22.5341	22.6295	COQ7	Q99807	5-demethoxyubiquinone hydroxylase, mitochondrial OS=Homo sapiens OX=9606 GN=COQ7 PE=1 SV=3	3	40
22.1459	22.179	22.1355	21.678	22.5333	21.9919	22.2908	22.4381	22.4143	22.2732	22.0058	21.9816	22.1881	22.0281	22.1361	21.8062	21.9995	22.0045	22.4297	22.1558	22.2094	22.0114	21.9042	22.2223	21.8373	22.1054	22.0279	21.9696	22.1681	22.1915	21.8345	21.9133	21.9689	22.0252	22.0022	22.4489	22.0297	22.3166	21.5243	21.712	22.2904	22.0949	22.1276	21.2153	21.6655	HDDC2	Q7Z4H3	5'-deoxynucleotidase HDDC2 OS=Homo sapiens OX=9606 GN=HDDC2 PE=1 SV=1	4	41
19.3486	NaN	19.793	19.9517	20.0325	NaN	NaN	NaN	NaN	19.9149	19.9288	20.7457	19.8432	NaN	20.5184	NaN	NaN	19.9106	19.702	19.2571	NaN	19.9289	20.3113	19.4855	20.146	19.9067	NaN	19.6421	NaN	NaN	19.942	19.2608	20.1587	20.0619	19.8325	20.0453	18.6564	20.3872	19.5842	20.3019	20.335	18.9585	NaN	20.1137	NaN	MTHFS	P49914	5-formyltetrahydrofolate cyclo-ligase OS=Homo sapiens OX=9606 GN=MTHFS PE=1 SV=2	3	28
22.2147	21.6723	21.8703	22.9736	27.6616	24.7351	24.8518	25.6712	23.7388	26.5373	25.4678	26.3085	25.3828	24.9831	27.3472	23.4325	25.8159	25.7358	24.6442	24.5271	22.7222	25.2769	23.7813	26.0471	25.4685	26.3644	25.1677	25.9318	26.5144	24.573	26.0547	25.838	26.6982	26.6532	25.3136	25.8901	26.4099	24.7261	24.5755	27.0094	24.9621	24.8726	26.383	25.8533	25.7586	ARHGDIB	P52566	Rho GDP-dissociation inhibitor 2 OS=Homo sapiens OX=9606 GN=ARHGDIB PE=1 SV=3	4	41
22.0694	21.094	21.9158	21.4159	21.2749	21.5384	19.8231	21.4356	21.1919	21.7503	20.0042	21.5309	20.8792	21.6571	22.0427	21.6591	20.6924	20.9849	21.5177	21.2842	20.6696	21.6528	21.1324	21.8109	21.4852	21.8868	22.0342	20.9112	21.3081	21.5708	21.751	21.8461	20.9703	21.3882	21.9957	21.5993	21.5613	21.7913	21.4472	21.7005	22.0351	22.2866	20.9972	19.965	21.5352	NT5DC1	Q5TFE4	5'-nucleotidase domain-containing protein 1 OS=Homo sapiens OX=9606 GN=NT5DC1 PE=1 SV=1	4	41
21.7336	21.9746	21.8425	21.8572	22.7791	21.648	21.8799	21.587	22.1569	23.2576	21.8136	22.2944	22.3536	21.7796	22.4616	21.6936	21.8085	22.0235	21.9191	21.9013	21.8483	21.768	22.0139	21.9522	21.9335	22.4175	21.1239	22.0751	21.705	22.2333	21.8081	21.2007	21.7067	21.8898	21.6153	21.6362	21.6353	22.4668	22.2007	21.724	21.9606	22.8415	21.9234	21.9468	21.3711	NT5DC3	Q86UY8	5'-nucleotidase domain-containing protein 3 OS=Homo sapiens OX=9606 GN=NT5DC3 PE=1 SV=1	4	41
30.1003	29.5271	30.0833	30.0167	29.6201	29.6682	29.7524	29.2976	29.3307	29.4026	29.4156	29.5713	29.2262	29.4734	29.5268	30.0178	29.2176	29.8116	29.7433	29.8403	29.8222	30.1763	29.9955	29.9423	30.3034	30.2988	29.889	30.0519	29.6604	29.74	29.822	30.1256	28.8112	29.9049	30.0626	30.0652	30.4524	29.9768	29.6882	30.1455	30.4108	30.3162	29.558	29.638	30.3186	NT5E	P21589	5'-nucleotidase OS=Homo sapiens OX=9606 GN=NT5E PE=1 SV=1	4	41
23.2032	22.953	22.79	22.487	22.8591	23.1335	22.8817	22.9372	23.1174	22.7211	22.8279	22.8618	22.5016	22.7079	22.902	23.0208	23.2446	22.9543	22.8024	22.9318	23.2069	23.0962	23.1414	23.0961	22.5994	22.5975	22.4988	22.5053	22.9865	22.7041	22.7632	22.7791	22.9016	22.2871	22.7083	22.5718	22.9507	22.5226	22.9195	22.1836	22.521	22.504	22.3867	21.0946	22.6627	OPLAH	O14841	5-oxoprolinase OS=Homo sapiens OX=9606 GN=OPLAH PE=1 SV=3	4	41
18.7454	18.9996	18.7535	18.8935	19.2579	18.8804	18.8853	18.6885	18.9445	18.8316	18.9709	18.8919	19.0928	18.9904	19.1705	19.0408	19.0102	19.2406	19.6237	19.0639	19.0606	18.7719	18.7419	19.1924	19.6577	18.8516	19.3428	18.4568	18.8373	19.1503	18.7374	18.9671	19.0558	19.3809	18.7893	18.8582	18.8544	18.5879	19.4493	19.0015	19.0885	18.9345	19.2929	18.2422	18.9262	PHYKPL	Q8IUZ5	5-phosphohydroxy-L-lysine phospho-lyase OS=Homo sapiens OX=9606 GN=PHYKPL PE=1 SV=1	4	41
30.0037	29.9947	29.9733	30.0173	30.5567	30.1347	30.026	30.1553	30.0892	32.0438	30.2397	30.6213	30.2424	30.1987	30.7067	30.5483	30.2566	30.0709	30.0911	30.127	30.158	30.06	30.1302	30.1257	30.2149	30.8932	29.8918	30.2688	30.0479	30.1807	30.1255	29.8916	30.1502	30.189	29.9969	30.7587	29.9182	30.0614	29.9865	30.4233	30.4781	30.7796	30.207	31.1946	29.7877	HSPD1	P10809	60 kDa heat shock protein, mitochondrial OS=Homo sapiens OX=9606 GN=HSPD1 PE=1 SV=2	4	41
25.9382	25.9576	25.8859	25.7968	25.7783	25.8931	25.8049	25.8482	25.9266	25.9143	25.8941	25.8746	25.7368	25.7248	25.7896	26.0296	25.9348	25.923	25.8312	25.7428	25.9862	25.9431	25.9869	25.9773	25.7782	26.2036	25.8663	25.8596	25.8028	25.7542	25.7813	25.7697	25.6597	25.5889	25.8383	26.0936	25.7067	25.7727	25.8191	25.8308	26.0557	26.0251	25.6816	25.4553	25.6512	RO60	P10155	60 kDa SS-A/Ro ribonucleoprotein OS=Homo sapiens OX=9606 GN=RO60 PE=1 SV=2	4	41
28.5287	28.4134	28.5108	28.4011	28.6373	28.46	28.4993	28.5927	28.4226	28.1707	28.3541	28.5196	28.47	28.5901	28.4634	28.5191	28.3864	28.4944	28.4464	28.391	28.6649	28.6784	28.5728	28.7114	28.6536	28.4571	28.5916	28.5298	28.5642	28.6399	28.5473	28.6496	28.2693	28.5722	28.5834	28.4464	28.562	28.4443	28.3829	28.5949	28.4739	28.3475	28.535	27.4841	28.623	RPLP0	P05388	60S acidic ribosomal protein P0 OS=Homo sapiens OX=9606 GN=RPLP0 PE=1 SV=1	4	41
20.5458	20.6649	20.8206	20.8327	20.1226	20.3731	20.4458	20.1268	19.9326	NaN	19.699	20.4412	20.5074	20.9281	20.6214	20.5819	20.5746	20.2217	20.4773	20.3629	20.1537	20.4503	20.3478	20.3533	20.7534	18.8068	21.1598	21.0423	21.0174	21.2767	21.0173	21.335	21.0614	20.1576	21.2493	20.8048	20.9043	20.8048	NaN	20.5523	NaN	20.2895	20.4697	NaN	14.8439	RPLP1	P05386	60S acidic ribosomal protein P1 OS=Homo sapiens OX=9606 GN=RPLP1 PE=1 SV=1	4	37
28.3099	28.5194	28.3729	28.1096	28.3883	28.4981	28.4533	28.4474	28.3792	27.9771	28.4469	28.2769	28.4065	28.5469	28.4326	28.4445	28.487	28.4122	28.359	28.5085	28.5238	28.7166	28.6071	28.6127	28.5303	28.2154	28.7072	28.5274	28.3944	28.5342	28.3003	28.4709	28.2584	28.3524	28.4396	28.3256	28.348	28.3613	28.4633	28.2495	28.4817	28.2978	28.4591	27.0459	28.4152	RPLP2	P05387	60S acidic ribosomal protein P2 OS=Homo sapiens OX=9606 GN=RPLP2 PE=1 SV=1	4	41
23.5677	23.5286	23.5655	23.5598	23.4428	23.2258	23.1553	23.5163	23.3775	23.2993	23.321	23.3402	23.4402	23.5575	23.5866	23.3778	23.6053	23.4353	23.3965	23.4988	23.5099	23.578	23.5804	23.4853	23.7377	23.4594	23.3394	23.2962	23.5266	23.5599	23.4147	23.5978	23.4194	23.6089	23.5785	23.6237	23.5782	23.6867	23.565	23.758	23.4999	23.5604	23.6891	22.7707	23.4617	NMD3	Q96D46	60S ribosomal export protein NMD3 OS=Homo sapiens OX=9606 GN=NMD3 PE=1 SV=1	4	41
27.6106	27.3807	27.3257	27.2648	27.8463	27.622	27.7113	27.7676	27.7506	27.4428	27.7139	27.5795	27.625	27.5649	27.4611	27.5943	27.5666	27.6891	27.6652	27.3309	27.5721	27.4993	27.4562	27.5653	27.4931	27.2363	27.4049	27.5704	27.5828	27.5817	27.5505	27.4964	27.4662	27.5239	27.4623	27.4285	27.4363	27.4273	27.3292	27.4868	27.3538	27.3047	27.4245	26.4407	27.4312	RPL10	P27635	60S ribosomal protein L10 OS=Homo sapiens OX=9606 GN=RPL10 PE=1 SV=4	4	41
28.3086	28.3107	28.2984	27.9699	28.49	28.305	28.2407	28.4107	28.3114	28.0746	28.3162	28.2908	28.2	28.3319	28.2427	28.3614	28.3046	28.2627	28.2382	28.2993	28.3632	28.4208	28.3217	28.4721	28.3626	28.1981	28.3104	28.3437	28.3923	28.327	28.2941	28.3717	28.1439	28.1885	28.358	28.2343	28.3134	28.2925	28.1445	28.2996	28.2173	28.2388	28.2793	27.1773	28.3032	RPL10A	P62906	60S ribosomal protein L10a OS=Homo sapiens OX=9606 GN=RPL10A PE=1 SV=2	4	41
27.6956	27.4496	27.4442	27.4296	27.9291	27.6173	27.7267	27.7212	27.6754	27.6035	27.66	27.6508	27.5934	27.5942	27.5543	27.7092	27.5753	27.507	27.5659	27.5726	27.7452	27.6623	27.5883	27.6548	27.5824	27.6882	27.6833	27.7029	27.63	27.6973	27.608	27.5205	27.4117	27.4484	27.5645	27.7673	27.6937	27.5898	27.4516	27.6297	27.5263	27.6641	27.506	26.8947	27.5795	RPL11	P62913	60S ribosomal protein L11 OS=Homo sapiens OX=9606 GN=RPL11 PE=1 SV=2	4	41
28.2002	28.2199	28.3949	28.1974	28.4554	28.2731	28.3752	28.3897	28.371	27.9152	28.3174	28.3717	28.2528	28.3909	28.2845	28.2184	28.254	28.2768	28.1629	28.0524	28.2995	28.3543	28.3907	28.465	28.3893	28.1917	28.3746	28.3642	28.365	28.2812	28.3679	28.4841	28.2828	28.4501	28.3349	28.217	28.3702	28.34	28.3173	28.3276	28.2808	28.1909	28.3898	27.1784	28.4339	RPL12	P30050	60S ribosomal protein L12 OS=Homo sapiens OX=9606 GN=RPL12 PE=1 SV=1	4	41
26.9285	27.2368	27.1773	26.9849	27.4315	27.2371	27.4171	27.4881	27.6288	26.9347	27.4789	27.2943	27.3413	27.2383	27.57	27.319	27.6801	27.4159	27.5419	27.1633	27.2467	27.4838	27.4074	27.4087	27.5008	26.8647	27.5382	27.6346	27.6018	27.6086	27.4765	27.4833	27.2278	27.2463	27.4344	27.2838	27.3249	27.3345	27.3391	27.4401	27.071	26.8938	27.5872	25.5535	27.464	RPL13	P26373	60S ribosomal protein L13 OS=Homo sapiens OX=9606 GN=RPL13 PE=1 SV=4	4	41
26.3323	26.1832	26.1235	26.2711	26.7119	26.2897	26.2719	26.5406	26.4494	26.3046	26.5053	26.16	26.2919	26.3508	26.1742	26.3846	26.1464	26.435	26.5301	26.3066	26.3159	26.4661	26.4165	26.408	26.3935	26.1448	26.3623	26.447	26.4666	26.4935	26.539	26.6176	26.3895	26.3102	26.549	26.4764	26.4913	26.432	26.2397	26.6071	26.3374	26.4398	26.4109	25.4328	26.5536	RPL13A	P40429	60S ribosomal protein L13a OS=Homo sapiens OX=9606 GN=RPL13A PE=1 SV=2	4	41
27.6113	27.7716	27.674	27.6046	27.9283	27.7031	27.803	27.8375	27.9269	27.6204	27.9994	27.8668	27.9406	27.7819	27.7282	27.8222	27.7462	27.6794	27.7157	27.5484	27.8363	27.7748	27.7169	27.7374	27.5579	27.5764	27.7726	27.7921	27.723	27.7964	27.8453	27.8096	27.6838	27.7795	27.7848	27.759	27.7061	27.7169	27.5397	27.7607	27.6745	27.7323	27.8271	26.8962	27.716	RPL14	P50914	60S ribosomal protein L14 OS=Homo sapiens OX=9606 GN=RPL14 PE=1 SV=4	4	41
26.1211	26.3318	26.6456	26.6779	26.912	26.4871	26.634	27.1337	26.717	26.5116	26.7714	26.5958	26.5661	26.6646	27.191	26.6495	27.0021	26.5635	26.7734	26.4897	26.4753	26.6341	26.9471	26.9662	26.7911	26.7765	27.2792	27.2324	27.1804	27.2205	27.0564	26.8495	26.7775	26.6912	26.918	26.646	27.0357	26.8121	27.1046	26.9724	26.7533	26.2407	26.7715	26.3077	26.8216	RPL15	P61313	60S ribosomal protein L15 OS=Homo sapiens OX=9606 GN=RPL15 PE=1 SV=2	4	41
28.7459	28.7071	28.7517	28.4706	28.785	28.6242	28.5122	28.6952	28.6647	28.4286	28.7602	28.6592	28.5531	28.6383	28.4934	28.7271	28.5876	28.6745	28.6326	28.5533	28.8483	28.8781	28.7676	28.7298	28.772	28.6014	28.4393	28.6395	28.594	28.5163	28.6684	28.6436	28.3455	28.6308	28.5784	28.6542	28.681	28.5862	28.3722	28.6788	28.574	28.6038	28.5805	27.9616	28.7372	RPL17	P18621	60S ribosomal protein L17 OS=Homo sapiens OX=9606 GN=RPL17 PE=1 SV=3	4	41
26.4473	26.756	26.6274	26.9518	27.3632	26.8385	26.8299	27.4052	27.2636	26.9804	27.1242	27.1594	27.051	27.1621	27.4424	26.813	27.3486	26.9706	27.0257	26.5883	26.6833	26.958	26.6116	26.8915	27.0149	26.7289	27.4408	27.2096	27.1904	27.221	27.0716	27.0845	26.9315	27.0791	27.0651	26.9806	27.2784	27.0718	27.1901	27.2698	26.8719	26.8401	27.1785	26.7287	27.2667	RPL18	Q07020	60S ribosomal protein L18 OS=Homo sapiens OX=9606 GN=RPL18 PE=1 SV=2	4	41
27.2216	27.0341	27.289	27.0832	27.4352	27.2115	27.3419	27.4856	27.4572	27.343	27.3082	27.3828	27.4046	27.3398	27.3893	27.2283	27.3914	27.3132	27.4868	27.0133	27.4658	27.2242	27.3611	27.3436	27.2937	27.1432	27.2972	27.431	27.4634	27.2236	27.4019	27.3562	27.1344	27.3634	27.1805	27.4977	27.5382	27.4405	27.3704	27.5071	27.3166	27.4811	27.5168	26.4137	27.3454	RPL18A	Q02543	60S ribosomal protein L18a OS=Homo sapiens OX=9606 GN=RPL18A PE=1 SV=2	4	41
26.051	26.0039	26.1523	26.1122	26.6802	26.4017	26.4849	26.5302	26.5434	25.9441	26.5334	26.2837	26.3209	26.3509	26.2461	26.3721	26.3571	26.3773	26.642	26.2701	26.2074	26.2804	26.1717	26.1404	26.3618	25.9792	26.2193	26.6178	26.4534	26.5482	26.4215	26.3853	26.192	26.2426	26.335	25.9887	26.4012	26.332	26.3578	26.4208	26.2133	26.0985	26.2656	24.9149	26.4253	RPL19	P84098	60S ribosomal protein L19 OS=Homo sapiens OX=9606 GN=RPL19 PE=1 SV=1	4	41
26.6867	26.5556	26.6199	26.3841	26.8282	26.8189	26.7411	26.9144	26.6125	26.4449	26.5123	26.5367	26.5987	26.7039	26.4888	26.7201	26.574	26.8477	26.7372	26.7857	26.9089	26.7733	26.5726	26.843	26.7249	26.5705	26.6767	26.6334	26.6446	26.817	26.7131	26.7185	26.128	26.5772	26.6655	26.4911	26.7164	26.5052	26.1062	26.6701	26.5022	26.5204	26.3446	24.3401	26.4152	RPL21	P46778	60S ribosomal protein L21 OS=Homo sapiens OX=9606 GN=RPL21 PE=1 SV=2	4	41
27.6411	27.649	27.7034	27.6141	28.0958	27.6308	27.7595	27.7017	27.7322	27.6796	27.5246	27.6951	27.7457	27.7487	27.5555	27.6581	27.6146	27.6459	27.6937	27.6765	27.7742	27.7709	27.7298	27.7215	27.6869	27.6399	27.8496	27.8504	27.7894	27.7859	27.852	27.8724	27.7822	27.7876	27.8348	27.9365	27.9824	27.6034	27.8197	27.8747	28.001	27.8233	27.9259	27.0288	27.8473	RPL22	P35268	60S ribosomal protein L22 OS=Homo sapiens OX=9606 GN=RPL22 PE=1 SV=2	4	41
24.2833	23.6916	24.1022	24.3394	24.1857	24.543	24.6181	24.9127	24.7616	24.5961	24.55	24.5302	23.8764	24.6874	23.9122	24.3839	23.6999	23.7932	24.6427	24.4545	24.551	24.5219	24.628	24.517	24.2966	24.279	23.7081	24.5524	23.9569	25.0585	24.8321	24.7289	23.9036	23.6419	24.3671	24.6652	24.576	24.5748	24.6154	24.6475	24.6453	24.6762	24.4045	24.2727	24.6945	RPL22L1	Q6P5R6	60S ribosomal protein L22-like 1 OS=Homo sapiens OX=9606 GN=RPL22L1 PE=1 SV=2	4	41
27.2985	27.3193	27.2957	27.2353	27.6889	27.3685	27.6168	27.6425	27.6649	27.3892	27.5511	27.4818	27.4133	27.4677	27.3133	27.3675	27.4622	27.5854	27.5117	27.2898	27.5794	27.367	27.5674	27.2726	27.2603	27.0361	27.2683	27.274	27.1948	27.1698	27.2548	27.2511	27.425	27.3688	27.3321	27.4316	27.334	27.2847	27.3	27.499	27.3313	27.4998	27.4241	26.8689	27.4251	RPL23	P62829	60S ribosomal protein L23 OS=Homo sapiens OX=9606 GN=RPL23 PE=1 SV=1	4	41
27.9235	27.6336	27.6807	27.6047	27.7727	27.7283	27.7971	27.8312	27.8871	27.3504	27.7898	27.6074	27.7778	27.8555	27.5401	27.7054	27.7534	27.8343	27.8986	27.7666	27.8248	27.691	27.79	27.7578	27.7146	27.4576	27.7705	27.8598	27.7344	27.7518	27.7942	27.8965	27.6405	27.7038	27.7975	27.703	27.7545	27.8006	27.6398	27.7035	27.8008	27.6734	27.7274	26.3132	27.8844	RPL23A	P62750	60S ribosomal protein L23a OS=Homo sapiens OX=9606 GN=RPL23A PE=1 SV=1	4	41
27.4573	27.6341	27.5324	27.2184	27.798	27.5038	27.5591	27.6696	27.6511	27.1257	27.6581	27.7034	27.5755	27.636	27.4136	27.6383	27.5903	27.6494	27.5747	27.5518	27.6467	27.6453	27.7027	27.8123	27.6884	27.3591	27.5251	27.5804	27.5639	27.7002	27.6664	27.6217	27.3574	27.5833	27.8006	27.5502	27.558	27.6628	27.3555	27.67	27.5274	27.4652	27.6208	26.3216	27.6069	RPL24	P83731	60S ribosomal protein L24 OS=Homo sapiens OX=9606 GN=RPL24 PE=1 SV=1	4	41
27.527	27.4865	27.4402	27.554	27.6845	27.5192	27.703	27.741	27.7731	27.3497	27.6408	27.5643	27.7163	27.441	27.294	27.6539	27.6463	27.5114	27.6758	27.71	27.6399	27.5852	27.6036	27.6044	27.5664	27.3966	27.6367	27.7988	27.7559	27.6872	27.7392	27.803	27.6273	27.5909	27.7067	27.7803	27.6463	27.8966	27.5053	27.813	27.7615	27.6452	27.7099	26.0667	27.8157	RPL26	P61254	60S ribosomal protein L26 OS=Homo sapiens OX=9606 GN=RPL26 PE=1 SV=1	4	41
20.9803	NaN	21.8402	NaN	22.0742	21.7704	20.7791	NaN	21.9696	21.7066	22.2049	22.2416	22.2364	NaN	21.0161	20.6878	21.4591	NaN	21.0514	22.0765	20.9361	20.6525	20.6093	NaN	NaN	21.1804	20.3965	20.6883	NaN	NaN	NaN	20.9803	19.9638	NaN	21.2125	20.8014	NaN	19.5689	NaN	21.5034	20.1046	20.9	21.544	19.7249	21.0897	RPL26L1	Q9UNX3	60S ribosomal protein L26-like 1 OS=Homo sapiens OX=9606 GN=RPL26L1 PE=1 SV=1	2	30
28.6461	28.6894	28.6779	28.5825	28.8877	28.5981	28.6226	28.7579	28.6856	28.3745	28.7007	28.5647	28.6968	28.628	28.5052	28.6641	28.5858	28.6663	28.5692	28.6358	28.6541	28.6725	28.7009	28.7682	28.7033	28.6657	28.7417	28.7474	28.706	28.6552	28.6682	28.7026	28.5028	28.5723	28.698	28.6921	28.5711	28.5702	28.427	28.7063	28.5809	28.5416	28.578	27.7797	28.6429	RPL27	P61353	60S ribosomal protein L27 OS=Homo sapiens OX=9606 GN=RPL27 PE=1 SV=2	4	41
27.2924	27.7035	27.5625	27.3946	27.9552	27.5873	27.6431	27.8625	27.8575	27.3209	27.7618	27.5632	27.7312	27.5726	27.5307	27.9212	27.6412	27.7244	27.6824	27.7051	27.6801	27.64	27.6949	27.7915	27.6785	27.4527	27.7242	27.7294	27.7272	27.7405	27.8085	27.6918	27.6445	27.8508	27.9447	27.7531	27.9055	27.7016	27.5554	27.9115	27.7327	27.5947	27.7634	25.9027	27.7952	RPL27A	P46776	60S ribosomal protein L27a OS=Homo sapiens OX=9606 GN=RPL27A PE=1 SV=2	4	41
26.7399	26.6729	26.5933	26.8514	27.1539	26.6002	26.9401	27.1032	26.9985	26.7462	26.7324	26.7113	26.9625	26.955	26.886	26.9179	26.8373	26.7105	26.87	26.6817	26.7911	27.1636	26.8322	27.0384	27.0859	26.9187	27.0991	27.3289	27.1901	26.918	26.7936	27.2222	27.0366	26.8442	27.0248	26.8535	26.9206	27.0977	26.669	27.2011	26.8085	27.1156	26.7589	25.9436	26.8795	RPL28	P46779	60S ribosomal protein L28 OS=Homo sapiens OX=9606 GN=RPL28 PE=1 SV=3	4	41
28.3193	28.2779	28.4062	28.2947	28.7655	28.5432	28.4886	28.7489	28.6346	28.0723	28.5209	28.4582	28.6924	28.4527	28.3465	28.5262	28.3305	28.5264	28.5205	28.5263	28.6261	28.5852	28.4212	28.5648	28.3872	28.294	28.5343	28.5291	28.5054	28.837	28.5931	28.5149	28.2616	28.4755	28.5606	28.3683	28.6106	28.467	28.5641	28.5487	28.6278	28.3328	28.3731	27.6341	28.5739	RPL3	P39023	60S ribosomal protein L3 OS=Homo sapiens OX=9606 GN=RPL3 PE=1 SV=2	4	41
26.9499	26.8568	27.0776	26.9856	27.2517	26.9856	26.9637	27.1027	26.9211	27.1622	26.8875	26.9476	26.8984	26.9997	26.2731	27.068	26.9256	27.099	26.9817	27.1059	27.0064	27.0675	27.1275	27.1216	26.9802	27.0603	27.0257	27.2172	27.04	27.0254	27.003	27.149	26.9856	27.1074	27.1233	27.1864	27.2099	26.9798	26.852	27.2224	27.1789	27.2261	27.0496	27.0555	27.0874	RPL30	P62888	60S ribosomal protein L30 OS=Homo sapiens OX=9606 GN=RPL30 PE=1 SV=2	4	41
26.9305	26.7439	26.7082	26.7004	26.8376	26.868	26.8566	26.952	27.0003	26.4356	27.0001	26.6195	26.931	26.8694	26.7216	26.8482	26.9953	26.856	27.2215	26.9156	26.8982	26.8556	27.4433	26.7647	26.7175	26.5531	26.6706	26.8688	26.7826	26.8856	26.9056	26.6907	26.8264	26.9233	26.9213	26.947	26.7853	26.9664	26.8701	26.9391	26.7993	26.7175	26.864	25.1968	26.914	RPL31	P62899	60S ribosomal protein L31 OS=Homo sapiens OX=9606 GN=RPL31 PE=1 SV=1	4	41
24.2507	24.7397	25.2495	24.9146	25.5914	25.5938	24.9997	25.7667	25.3033	25.6061	24.9584	24.9077	24.683	25.2212	25.4505	25.3473	25.511	25.2456	25.4655	24.8245	25.2438	24.9903	25.4036	25.1056	25.1182	24.9208	25.3552	25.4016	25.5318	25.33	24.9991	24.9734	24.6881	25.1205	25.1266	25.2561	25.414	24.9448	25.3501	25.3713	25.0449	24.805	25.1591	25.0287	24.8895	RPL32	P62910	60S ribosomal protein L32 OS=Homo sapiens OX=9606 GN=RPL32 PE=1 SV=2	4	41
26.1552	26.4634	26.2956	26.2953	26.9421	26.467	26.5254	26.9108	26.8042	26.3602	26.7231	26.5894	26.946	26.549	26.4658	26.6833	26.8892	26.5455	26.5748	26.5519	26.3068	26.733	26.6082	26.852	26.6213	26.4769	26.7801	26.6938	26.9719	26.7736	27.0468	26.7896	26.5482	26.5425	26.8544	26.8515	26.9031	26.858	26.5503	26.9736	26.5115	26.5373	26.5829	25.3962	26.7633	RPL34	P49207	60S ribosomal protein L34 OS=Homo sapiens OX=9606 GN=RPL34 PE=1 SV=3	4	41
27.2015	27.1582	27.2127	27.3116	27.3941	27.1983	27.2712	27.3887	27.4819	27.181	27.453	27.1029	27.1263	27.1528	27.2154	27.2469	27.2847	27.3621	27.2529	27.183	27.1901	27.2745	27.3089	27.5884	27.4165	27.1357	27.3256	27.574	27.4252	27.3006	27.3202	27.2527	27.2222	27.1112	27.2355	27.2751	27.2329	27.3884	27.0468	27.3447	27.1742	27.1184	27.1287	25.7991	27.233	RPL35	P42766	60S ribosomal protein L35 OS=Homo sapiens OX=9606 GN=RPL35 PE=1 SV=2	4	41
27.4084	27.3085	27.4586	27.6926	27.6156	27.5003	27.4846	27.5096	27.6375	27.7441	27.6113	27.3489	27.6192	27.5063	27.4975	27.4692	27.5177	27.4761	27.5835	27.6594	27.5197	27.4649	27.4781	27.4925	27.407	27.6496	27.7545	27.7199	27.7211	27.6674	27.634	27.7192	27.7312	27.7975	27.5913	27.7284	27.6941	27.6711	27.5187	27.7694	27.6966	27.7075	27.8344	27.4741	27.8113	RPL35A	P18077	60S ribosomal protein L35a OS=Homo sapiens OX=9606 GN=RPL35A PE=1 SV=2	4	41
26.2047	26.301	26.6389	26.1963	26.5276	26.6969	26.5526	26.8906	26.7817	26.0367	26.5225	25.7927	26.3283	26.489	26.356	26.6784	26.4287	26.6066	26.4937	26.5545	26.6842	26.0562	26.5602	26.2509	26.3893	26.1386	26.4464	26.5299	26.6501	26.7004	26.1673	26.5748	26.2907	26.403	26.7008	26.3886	26.6871	26.4627	26.5707	26.6496	26.182	26.1946	26.3001	24.0386	26.5336	RPL36	Q9Y3U8	60S ribosomal protein L36 OS=Homo sapiens OX=9606 GN=RPL36 PE=1 SV=3	4	41
25.2292	25.227	25.0383	25.2955	25.4583	25.4633	25.0598	25.3053	25.2915	24.9124	25.1204	25.1531	25.4212	25.3945	24.7462	25.1663	25.1844	25.41	25.2577	25.33	25.3498	24.9238	25.3452	25.1469	24.9161	25.1151	25.2677	25.4577	25.4234	25.3306	25.276	25.1986	25.0827	25.3346	25.5645	25.2165	25.2786	25.1634	25.2211	25.1452	25.1114	25.0964	25.0284	24.1427	25.0431	RPL36A	P83881	60S ribosomal protein L36a OS=Homo sapiens OX=9606 GN=RPL36A PE=1 SV=2	4	41
21.9924	22.2994	22.1914	22.5064	21.8926	21.7914	22.1599	22.0164	22.017	21.5669	22.0229	21.7941	22.2081	22.2142	21.4828	21.9898	22.1764	22.2798	22.5144	22.3619	22.2	22.1756	22.27	22.1254	NaN	NaN	22.4671	22.7836	22.5394	22.3907	22.3809	22.6304	22.3991	22.5094	22.4993	22.2714	22.47	22.5183	22.3638	22.5394	22.9732	22.3044	22.4111	20.6623	22.3619	RPL36AL	Q969Q0	60S ribosomal protein L36a-like OS=Homo sapiens OX=9606 GN=RPL36AL PE=1 SV=3	4	39
25.6502	25.2655	26.1578	26.4906	26.3257	25.8106	26.0203	26.1098	25.925	26.3263	25.3758	25.1025	25.7772	25.565	25.8571	25.7239	25.7619	26.1155	25.2081	26.3663	26.1372	26.2021	26.2289	26.1103	26.0314	26.1012	26.1606	26.1222	25.9836	26.032	26.0492	26.3634	26.0489	26.1641	26.1726	26.3299	25.78	26.2793	26.1254	25.8702	26.3664	26.4825	26.1046	25.6187	26.3788	RPL37A	P61513	60S ribosomal protein L37a OS=Homo sapiens OX=9606 GN=RPL37A PE=1 SV=2	4	41
27.8316	27.6886	27.7976	27.3566	27.9062	27.7511	27.7288	27.878	27.4818	27.825	27.6832	27.4433	27.3066	27.381	27.6116	27.9053	27.7298	27.4932	27.6095	27.8072	27.5988	27.9196	27.5798	27.9244	27.9898	27.8752	27.616	27.5811	27.5478	27.583	27.5642	27.688	27.2781	27.4816	27.4768	27.6842	27.4426	27.4891	27.0507	27.4519	27.2413	27.3051	27.3511	27.014	27.4582	RPL38	P63173	60S ribosomal protein L38 OS=Homo sapiens OX=9606 GN=RPL38 PE=1 SV=2	4	41
24.8983	25.1135	25.0423	24.6979	25.0702	25.0899	25.1316	25.3979	25.2659	24.4	25.1582	25.161	25.1292	25.2956	24.8863	25.1283	25.1848	25.3852	25.0016	25.0441	25.2426	24.9406	25.1183	25.2358	25.1117	24.3024	25.0902	25.0676	24.9293	24.9283	24.8759	24.9731	24.9735	24.7121	25.1659	24.9122	25.1643	25.2566	25.2698	25.1374	25.0251	24.6561	24.9867	22.6505	25.4055	RPL39	P62891	60S ribosomal protein L39 OS=Homo sapiens OX=9606 GN=RPL39 PE=1 SV=2	4	41
28.3926	28.6097	28.5816	28.3934	28.6984	28.3986	28.5785	28.7022	28.7516	27.9995	28.6978	28.5493	28.5457	28.4615	28.4613	28.5106	28.5386	28.6241	28.6288	28.3446	28.7631	28.6195	28.5955	28.7189	28.5959	28.3412	28.6786	28.5742	28.6123	28.6171	28.5448	28.4485	28.408	28.3954	28.5958	28.3891	28.4927	28.4105	28.455	28.5608	28.2992	28.2525	28.4027	27.1901	28.5441	RPL4	P36578	60S ribosomal protein L4 OS=Homo sapiens OX=9606 GN=RPL4 PE=1 SV=5	4	41
27.9701	27.9392	27.8583	27.9728	28.2832	28.1497	28.1527	28.1371	28.0952	27.9083	28.0171	27.9402	28.1123	28.034	27.859	27.9815	27.9597	27.9279	27.939	27.9842	27.9713	27.9268	27.952	27.9569	27.886	27.7883	28.108	28.0655	28.1046	27.9938	28.0169	28.0071	27.8305	27.968	28.0317	27.9446	28.0479	27.9577	27.9673	28.017	27.9095	27.7773	27.9538	27.0546	27.9799	RPL5	P46777	60S ribosomal protein L5 OS=Homo sapiens OX=9606 GN=RPL5 PE=1 SV=3	4	41
28.5459	28.3355	28.0659	28.5188	28.7117	28.334	28.4032	28.6395	28.7752	28.2747	28.7874	28.4887	28.6205	28.7386	28.7265	28.4333	28.7276	28.5902	28.7218	28.5115	28.4028	28.6547	28.3027	28.535	28.4732	28.4055	28.7378	28.8295	28.7716	28.6154	28.6583	28.6362	28.6523	28.5347	28.5398	28.4599	28.6743	28.5811	28.479	28.6903	28.3073	28.426	28.5328	27.7131	28.7804	RPL6	Q02878	60S ribosomal protein L6 OS=Homo sapiens OX=9606 GN=RPL6 PE=1 SV=3	4	41
28.7262	28.603	28.6657	28.6232	28.9225	28.7635	28.7333	28.8479	28.8963	28.5661	28.7942	28.6323	28.7959	28.7613	28.7256	28.7332	28.8012	28.6732	28.6992	28.8284	28.7569	28.7331	28.6246	28.8172	28.7365	28.6155	28.8492	28.8176	28.8599	28.919	28.7969	28.7944	28.7797	28.6524	28.7806	28.7252	28.7005	28.7167	28.737	28.8747	28.8599	28.6421	28.791	27.9493	28.7507	RPL7	P18124	60S ribosomal protein L7 OS=Homo sapiens OX=9606 GN=RPL7 PE=1 SV=1	4	41
28.6243	28.4738	28.5233	28.3567	28.8596	28.4907	28.7185	28.9042	28.8686	28.1904	28.8166	28.6251	28.7375	28.6734	28.6784	28.5919	28.609	28.8209	28.843	28.5045	28.6661	28.5223	28.5011	28.7099	28.5035	28.4183	28.7446	28.6844	28.6788	28.6799	28.5445	28.517	28.4434	28.4237	28.6064	28.3084	28.563	28.4645	28.4867	28.5859	28.2598	28.2856	28.3889	27.385	28.7113	RPL7A	P62424	60S ribosomal protein L7a OS=Homo sapiens OX=9606 GN=RPL7A PE=1 SV=2	4	41
22.68	22.2685	22.6524	22.365	22.4433	22.1624	22.414	22.8351	22.8709	22.3466	22.4865	22.5389	22.661	22.4171	22.4384	22.661	22.6314	22.3291	22.8027	22.4803	22.6578	22.8873	22.4255	22.5021	22.8302	22.7735	22.5012	22.6222	22.5936	22.557	22.6929	22.5075	22.1411	22.7386	22.7145	22.7897	22.467	22.6746	22.7804	22.8364	22.9868	22.9475	22.5567	22.0366	22.4102	RPL7L1	Q6DKI1	60S ribosomal protein L7-like 1 OS=Homo sapiens OX=9606 GN=RPL7L1 PE=1 SV=2	4	41
28.2301	28.2048	28.1305	28.0915	28.4452	28.2491	28.3384	28.3597	28.4302	27.6518	28.3816	28.2733	28.33	28.2387	28.0586	28.2567	28.2601	28.4584	28.5612	28.269	28.1182	28.2174	28.1834	28.1339	28.198	27.8048	28.361	28.2694	28.2632	28.3383	28.2566	28.1978	28.0101	28.2449	28.2546	28.0795	28.2946	28.2531	28.3191	28.2671	28.1078	28.0154	28.1476	25.9398	28.2095	RPL8	P62917	60S ribosomal protein L8 OS=Homo sapiens OX=9606 GN=RPL8 PE=1 SV=2	4	41
26.9055	26.7728	26.9262	26.3894	26.733	26.6827	26.8153	27.0428	26.9414	26.6902	26.8209	26.7576	26.727	26.6823	26.7204	26.8228	26.8568	26.6786	26.9061	26.6426	26.8288	26.9192	26.8271	26.9914	27.0114	26.6629	26.6412	26.3579	26.708	26.6985	26.4992	26.6849	26.4963	26.5246	26.6379	26.6677	26.6468	26.719	26.8201	26.749	26.9371	26.7708	26.8038	25.474	26.9561	RPL9;RPL9P7;RPL9P8;RPL9P9	P32969	60S ribosomal protein L9 OS=Homo sapiens OX=9606 GN=RPL9 PE=1 SV=1	4	41
25.941	25.8704	25.6402	26.1549	26.2954	25.999	25.9172	25.88	26.1175	26.0189	25.8623	26.0048	25.9123	26.1869	26.0717	25.9146	26.1227	25.9238	25.7284	25.7173	25.7976	25.8244	25.3942	25.6877	25.6281	25.8372	25.6736	26.1571	26.0557	25.7925	25.9087	26.0269	25.3867	25.8515	25.823	25.7172	25.9757	26.0141	26.0289	26.0942	26.045	26.0386	26.0462	25.9837	26.0147	NIP7	Q9Y221	60S ribosome subunit biogenesis protein NIP7 homolog OS=Homo sapiens OX=9606 GN=NIP7 PE=1 SV=1	4	41
24.4748	24.454	24.1223	24.4524	24.5801	24.4545	24.5599	24.188	24.5133	24.3534	24.3015	24.3704	24.4552	24.6418	24.5435	24.578	24.5371	24.7868	24.5534	24.5241	24.4585	24.3049	24.2106	24.2831	24.4345	24.4104	24.7934	24.4865	24.4257	24.2464	24.3515	24.383	24.7192	24.8334	24.4098	24.4036	24.3071	24.4602	24.0738	24.4601	24.2546	24.1867	24.3922	24.0689	24.2327	PFKFB2	O60825	6-phosphofructo-2-kinase/fructose-2,6-bisphosphatase 2 OS=Homo sapiens OX=9606 GN=PFKFB2 PE=1 SV=2	4	41
18.8636	18.4021	18.3962	17.7101	20.9374	19.3087	19.384	20.2827	19.539	22.0218	19.9796	21.4581	20.7265	19.8753	21.7937	18.9598	20.0901	19.6844	19.49	18.8232	18.7837	18.8765	18.3311	19.1283	19.7311	19.0808	19.7136	19.5635	19.6431	18.5283	19.0667	19.223	19.2134	19.5033	18.9415	19.2225	19.2943	18.9636	18.4833	19.7765	18.8196	19.1104	19.1354	18.7211	19.7352	ARR3	P36575	Arrestin-C OS=Homo sapiens OX=9606 GN=ARR3 PE=1 SV=2	4	41
28.6639	28.6278	28.6298	28.6474	29.2942	28.8375	28.8009	28.7921	28.7465	28.8469	28.8044	28.9381	28.8434	28.7392	29.3239	28.9396	28.7868	28.8401	28.8094	28.8689	28.8278	28.8963	28.7556	28.796	28.7667	28.9191	29.194	29.0112	28.9872	28.8418	29.0654	29.0254	29.554	29.2731	29.0102	29.097	29.0296	28.9627	28.8449	29.1339	29.0044	29.1344	28.7747	28.3873	29.25	PGD	P52209	6-phosphogluconate dehydrogenase, decarboxylating OS=Homo sapiens OX=9606 GN=PGD PE=1 SV=3	4	41
26.2758	26.5334	26.5562	26.2372	26.4168	26.5996	26.4842	26.5288	26.513	26.0768	26.316	26.4379	26.2485	26.3366	26.5768	26.4867	26.5464	26.4495	26.3648	26.6878	26.4836	26.5649	26.6188	26.5615	26.3673	25.9865	26.2446	26.3504	26.4468	26.5658	26.3752	26.4037	26.2434	26.4053	26.5202	26.2228	26.2801	26.5854	26.4376	26.3109	26.3545	26.4372	26.3667	25.2584	26.2	PGLS	O95336	6-phosphogluconolactonase OS=Homo sapiens OX=9606 GN=PGLS PE=1 SV=2	4	41
21.3938	20.9738	21.4728	20.0433	21.2269	21.0244	21.0413	21.3374	21.621	20.5349	21.4889	20.5407	21.0438	20.6345	21.014	20.9757	21.492	20.6351	20.8288	21.2521	20.9709	20.962	21.2797	21.1307	20.7074	20.4162	21.2672	20.805	21.1642	20.5189	21.0941	21.2254	21.0726	20.815	21.4737	21.0943	20.9888	21.319	20.8767	21.1658	21.3144	20.3747	21.1388	20.0569	21.276	PTS	Q03393	6-pyruvoyl tetrahydrobiopterin synthase OS=Homo sapiens OX=9606 GN=PTS PE=1 SV=1	4	41
21.9312	22.0603	21.9102	21.613	22.077	21.9606	21.6309	22.2217	22.2042	21.6601	22.1265	21.6772	21.7176	21.8911	22.1051	22.0645	22.3881	21.9239	21.9502	21.725	22.2651	22.1057	22.13	22.0321	22.2267	21.941	20.9756	21.7921	21.7555	22.1757	21.6375	21.6856	21.9802	21.6478	21.7917	21.7762	21.8142	21.9184	21.7936	22.0488	21.8769	22.1169	21.9507	19.0798	21.4556	NUDT1	P36639	7,8-dihydro-8-oxoguanine triphosphatase OS=Homo sapiens OX=9606 GN=NUDT1 PE=1 SV=3	4	41
26.6443	26.7628	26.6857	26.7183	26.3953	26.6868	26.7987	26.6065	26.7528	26.7573	26.9173	26.5812	26.6064	26.5912	26.3413	26.8918	26.6646	26.4395	26.4027	26.5988	26.7316	26.5496	26.8972	26.7088	26.6169	27.0318	27.1624	26.7598	26.6971	26.7813	26.9462	27.0094	26.4673	26.5996	26.6904	27.0977	26.5921	26.6832	26.7525	26.5997	27.0096	27.1113	26.6513	26.4677	26.8182	MMP2	P08253	72 kDa type IV collagenase OS=Homo sapiens OX=9606 GN=MMP2 PE=1 SV=2	4	41
25.4719	25.547	25.4831	25.7883	25.5891	25.4425	25.897	25.3123	25.6277	25.057	25.5612	25.5143	25.4193	25.4836	25.4378	25.7661	25.8099	25.4216	25.6624	25.7689	26.1166	25.7057	25.9153	25.9074	25.5164	25.465	26.7481	25.9951	26.1118	25.976	25.8345	26.0599	26.3738	26.1924	26.0163	26.1724	25.9384	26.1569	25.9995	25.9483	26.0854	26.0013	25.7052	25.0443	26.0449	DHCR7	Q9UBM7	7-dehydrocholesterol reductase OS=Homo sapiens OX=9606 GN=DHCR7 PE=1 SV=1	4	41
20.8842	20.8224	20.7155	20.8368	21.1124	21.1619	20.8151	21.1265	21.2146	20.6963	21.3268	20.685	21.1265	20.8992	20.4995	20.7302	21.0824	20.9051	20.8512	20.7241	20.7611	20.8571	20.6137	20.86	21.2243	20.4939	20.9132	20.6175	20.5269	21.0402	21.0621	20.9411	19.8082	20.8452	20.6848	21.0041	20.5844	20.7139	20.4587	20.8497	20.7784	20.7692	20.4847	19.1884	21.1323	NT5C3B	Q969T7	7-methylguanosine phosphate-specific 5'-nucleotidase OS=Homo sapiens OX=9606 GN=NT5C3B PE=1 SV=4	4	41
21.0714	21.5813	21.5598	20.636	21.7564	21.6457	21.181	21.5227	21.5506	20.0817	21.7261	21.8916	22.1516	21.1272	21.2382	21.0482	20.9435	21.6637	21.738	21.4923	21.3659	20.9584	21.6958	21.5976	21.671	21.2133	21.0934	20.1284	21.418	21.9257	21.774	21.135	21.4313	20.8089	21.4165	21.361	21.3445	21.365	21.4094	21.8189	22.0617	21.8112	21.7142	19.5271	21.0075	MEPCE	Q7L2J0	7SK snRNA methylphosphate capping enzyme OS=Homo sapiens OX=9606 GN=MEPCE PE=1 SV=1	4	41
19.3173	19.6912	19.7764	19.1267	19.2417	19.2026	19.3712	20.0395	19.4514	19.3356	19.6372	20.0527	19.763	20.0375	19.9556	18.2942	20.2577	19.9113	20.1816	19.4581	20.1495	20.1175	20.4176	19.4816	19.2771	19.4857	19.5195	20.1017	19.5913	19.5925	19.1862	19.9632	19.7651	20.0105	19.685	18.7678	19.8448	19.1325	19.5901	20.1823	19.8732	20.0411	19.9412	20.2769	19.9065	NUDT18	Q6ZVK8	8-oxo-dGDP phosphatase NUDT18 OS=Homo sapiens OX=9606 GN=NUDT18 PE=1 SV=3	4	41
23.3465	23.6163	23.3405	23.5461	23.0515	23.5279	24.2373	22.9977	22.7554	24.4731	22.9541	22.8833	23.0529	22.7308	22.6879	23.1774	23.2832	23.2251	22.9214	23.1923	23.2487	22.8346	22.9014	23.3509	23.0789	24.9076	24.6723	22.8008	23.3215	22.3499	22.972	22.7766	23.3408	23.5718	22.8101	23.9667	23.291	22.9784	23.1294	22.6349	23.5728	23.7849	23.12	24.0603	23.4099	ADAMTS1	Q9UHI8	A disintegrin and metalloproteinase with thrombospondin motifs 1 OS=Homo sapiens OX=9606 GN=ADAMTS1 PE=1 SV=4	4	41
20.4334	20.1639	20.128	21.2085	20.3499	20.7072	20.535	19.9711	19.1387	21.612	19.9111	20.3635	20.0269	20.3042	20.1573	21.4789	19.5648	19.6329	20.1024	20.4834	20.723	20.3469	20.4666	19.7692	20.446	21.1884	21.8299	19.7744	20.524	18.8772	20.0658	20.3232	20.1224	20.9951	19.8442	21.8793	20.7178	20.0428	19.2513	19.9623	21.6181	21.4384	20.1318	19.4919	21.1554	ADAMTS2	O95450	A disintegrin and metalloproteinase with thrombospondin motifs 2 OS=Homo sapiens OX=9606 GN=ADAMTS2 PE=2 SV=2	4	41
20.1557	19.5177	20.5615	20.4908	23.3195	20.8693	20.9646	22.2108	21.2059	23.2376	21.7891	23.6823	22.1837	21.8829	24.1093	21.011	22.2847	22.0205	21.6479	20.8915	20.0518	20.8973	20.0333	21.0477	22.1298	21.3445	21.8429	22.0174	22.9765	21.0341	21.7812	22.0255	21.7036	22.9543	21.0557	21.27	22.0655	21.7244	21.1264	22.858	21.3912	22.3717	22.0043	20.4298	21.8	ARRB1	P49407	Beta-arrestin-1 OS=Homo sapiens OX=9606 GN=ARRB1 PE=1 SV=2	4	41
16.9479	16.9167	16.9032	16.4999	19.447	16.6965	16.5651	18.6729	18.8547	18.7642	16.2196	19.0947	16.5343	16.8334	18.4933	19.8545	19.2157	18.7325	19.1619	16.4918	18.7593	19.1628	18.478	18.5489	16.5988	19.3602	17.4059	18.5535	16.783	18.667	16.337	19.216	16.1919	18.5406	16.5421	18.9752	16.6113	18.5026	18.7	19.2714	16.5158	16.9524	16.8533	15.3829	16.1613	ATF7	P17544-1	Isoform 6 of Cyclic AMP-dependent transcription factor ATF-7 OS=Homo sapiens OX=9606 GN=ATF7	4	41
17.3925	17.4754	17.9875	17.4083	16.8336	15.5998	16.9967	18.157	17.3253	16.9413	18.0586	17.5478	17.8128	18.0044	17.6393	17.1546	17.6512	17.3367	17.7641	17.5072	17.1083	17.8507	17.4286	17.991	17.7151	17.4007	14.2618	17.5488	17.7372	17.8641	17.8403	18.0628	17.4929	17.4501	17.7145	17.7591	17.9025	17.463	17.3711	17.0912	16.6147	17.3889	NaN	17.2309	17.6171	ABCA8	O94911	ABC-type organic anion transporter ABCA8 OS=Homo sapiens OX=9606 GN=ABCA8 PE=1 SV=4	4	40
24.6214	24.6682	24.5079	24.4335	24.6278	24.6157	24.6895	24.6641	24.5881	24.3826	24.4965	24.6105	24.5055	24.5627	24.4962	24.6826	24.6735	24.6899	24.3614	24.7229	24.6625	24.6862	24.5794	24.6813	24.7492	24.5509	24.7795	24.6594	24.7859	24.6482	24.6705	24.5884	24.6233	24.5071	24.6702	24.5708	24.4243	24.4189	24.4729	24.65	24.5376	24.4924	24.2729	23.5062	24.6159	ABI1	Q8IZP0	Abl interactor 1 OS=Homo sapiens OX=9606 GN=ABI1 PE=1 SV=4	4	41
22.931	22.3627	22.0746	22.4364	24.0694	23.1677	22.5013	22.821	22.6242	23.3792	23.3662	25.7691	25.0574	23.6859	25.9684	22.8217	23.3609	23.7898	23.5067	23.2681	22.7581	24.0357	22.9711	22.8041	23.8414	22.9918	23.6475	24.8422	23.883	22.5758	22.9806	22.4704	24.5727	23.8165	22.7616	23.0113	24.3974	22.7685	22.6431	23.9573	23.3793	23.7464	22.8352	21.7932	22.8582	ATP2A3	Q93084-1	Isoform SERCA3B of Sarcoplasmic/endoplasmic reticulum calcium ATPase 3 OS=Homo sapiens OX=9606 GN=ATP2A3	4	41
20.1583	19.2695	20.2203	19.1938	19.1638	19.6765	19.0069	19.5534	20.2074	19.0808	20.254	19.7559	19.3053	19.9537	20.0718	19.2733	19.5757	20.1123	20.1435	19.5513	20.1285	20.1297	20.2926	19.3217	20.2769	18.686	19.0361	19.8575	19.3208	20.2122	19.7811	19.3284	19.3256	19.193	20.3668	20.1861	19.3845	19.6923	19.0989	19.1089	19.9195	20.2575	19.8395	NaN	19.7584	ZFYVE19	Q96K21	Abscission/NoCut checkpoint regulator OS=Homo sapiens OX=9606 GN=ZFYVE19 PE=1 SV=3	4	40
23.6374	23.6777	23.7957	23.8179	23.8453	23.7681	23.9571	24.3041	23.9439	24.1311	23.7586	23.7818	23.8814	23.8113	23.8267	24.0147	24.2774	23.9132	23.9116	23.7119	24.043	23.9146	24.1823	24.1831	24.2619	23.3211	24.0934	24.2203	24.1119	23.97	23.8876	23.6733	24.0138	24.0754	24.0813	23.5223	23.7003	23.9372	23.5577	23.8295	23.7021	23.1334	23.4514	23.4146	23.9897	AACS	Q86V21	Acetoacetyl-CoA synthetase OS=Homo sapiens OX=9606 GN=AACS PE=1 SV=1	4	41
NaN	NaN	NaN	NaN	NaN	NaN	NaN	NaN	NaN	NaN	NaN	NaN	NaN	NaN	NaN	NaN	NaN	NaN	NaN	NaN	19.1937	NaN	NaN	NaN	NaN	NaN	NaN	NaN	NaN	NaN	NaN	NaN	NaN	NaN	NaN	NaN	NaN	NaN	NaN	NaN	NaN	NaN	NaN	NaN	NaN	ACHE	P22303	Acetylcholinesterase OS=Homo sapiens OX=9606 GN=ACHE PE=1 SV=1	0	1
26.1099	26.3717	26.3622	25.785	26.3795	26.491	26.4563	26.5635	26.6764	25.3811	26.469	26.539	26.6023	26.1196	26.4823	26.6763	26.5385	26.4435	26.544	26.5341	26.9179	26.5243	26.6748	26.4099	26.4547	25.4547	26.1442	26.2672	26.5043	26.5898	26.2633	26.3361	26.5952	26.3584	26.594	25.9766	26.4518	26.2304	26.5391	26.2502	26.1222	25.8812	25.9428	24.2963	26.1514	ACAT2	Q9BWD1	Acetyl-CoA acetyltransferase, cytosolic OS=Homo sapiens OX=9606 GN=ACAT2 PE=1 SV=2	4	41
26.5467	26.5237	26.673	26.4769	27.3715	26.938	26.669	26.6589	26.6608	28.9346	26.8261	27.2715	26.7559	26.8971	27.3971	27.0897	26.6699	26.5394	26.4951	26.7598	26.6839	26.61	26.5528	26.7812	26.7816	27.4956	26.4647	26.9358	26.6673	26.805	26.795	26.5933	26.6928	26.5975	26.7513	27.1624	26.841	26.5734	26.5074	27.1723	27.0372	26.9438	26.9584	27.8946	26.5279	ACAT1	P24752	Acetyl-CoA acetyltransferase, mitochondrial OS=Homo sapiens OX=9606 GN=ACAT1 PE=1 SV=1	4	41
25.5118	25.6835	25.7165	25.5878	26.0254	25.7204	26.0459	25.9671	26.0233	25.1807	25.8439	25.776	25.7155	25.6549	25.7762	25.9764	25.9536	25.8824	25.8179	25.7635	25.9185	25.9693	26.032	25.9181	25.8793	25.2925	26.0398	25.7417	25.9264	25.9387	25.7661	26.0181	26.0286	26.0223	25.8988	25.8682	25.9414	25.9015	26.0273	25.9769	25.8386	25.7682	25.4852	24.8905	26.0088	ACACA	Q13085	Acetyl-CoA carboxylase 1 OS=Homo sapiens OX=9606 GN=ACACA PE=1 SV=2	4	41
22.5122	22.3498	22.2312	22.5716	23.4696	23.0116	22.8595	22.9593	23.2951	25.3592	23.4016	23.4726	23.5674	22.6664	23.4971	23.2628	22.8621	22.3772	22.5573	22.9438	22.824	22.453	22.4706	22.1299	22.5441	23.2258	22.97	22.8658	22.5034	23.3024	22.954	22.739	23.5082	22.9281	22.8587	23.9108	23.0637	23.1156	23.1778	23.4532	23.7269	23.725	23.4748	25.0888	23.1362	ATP5MF (ATP5J2)	P56134-2	Isoform 2 of ATP synthase subunit f, mitochondrial OS=Homo sapiens OX=9606 GN=ATP5MF	4	41
23.5074	23.8161	23.9529	23.8835	24.5458	24.1421	23.9795	24.2022	24.4086	23.7251	24.4782	24.0013	24.0275	23.9682	24.6064	24.278	24.3466	24.1615	24.0112	23.8742	24.1597	24.1203	24.0029	24.0084	24.0653	23.5366	24.3595	24.3681	24.3209	24.4066	24.2825	24.1558	24.7918	24.4373	24.2492	23.9796	24.159	24.2957	24.2105	24.2103	24.1031	24.0846	23.8344	21.8447	24.3323	ACSS2	Q9NR19	Acetyl-coenzyme A synthetase, cytoplasmic OS=Homo sapiens OX=9606 GN=ACSS2 PE=1 SV=1	4	41
19.2192	20.6604	21.1209	20.8039	20.629	20.2241	20.7865	18.3806	20.768	21.5504	20.5323	20.8341	18.1562	20.9774	18.9803	21.0038	20.163	20.878	20.4979	20.3711	19.0813	20.821	20.7206	19.6499	19.2262	21.552	21.4856	20.7925	20.7679	20.7993	20.9405	20.8416	20.5728	20.7515	20.8588	20.9791	21.1005	20.7467	21.2794	20.8962	21.1461	21.1605	20.6864	21.5849	21.1297	SLC33A1	O00400	Acetyl-coenzyme A transporter 1 OS=Homo sapiens OX=9606 GN=SLC33A1 PE=1 SV=1	4	41
24.9635	24.8817	25.0675	25.1422	25.1228	25.3251	25.3171	24.9599	24.8824	26.8462	25.2271	25.5192	25.4358	25.1262	25.6121	25.3753	25.1113	25.1086	25.3028	25.2868	25.1655	25.2608	25.4031	25.2194	25.336	26.1052	25.3476	25.3496	25.1873	25.3517	25.5822	25.5643	25.1806	25.4586	25.4794	25.5605	25.3038	25.2128	25.1998	25.285	25.6591	25.7808	25.3386	26.1022	25.259	ASAH1	Q13510	Acid ceramidase OS=Homo sapiens OX=9606 GN=ASAH1 PE=1 SV=5	4	41
21.1029	21.0818	20.6423	20.687	19.9973	20.0395	20.576	20.0221	20.9861	21.4268	20.7225	20.0043	20.9064	19.732	21.2859	20.9581	20.6316	20.8073	20.8146	20.8584	20.5319	21.2239	21.1553	21.503	21.1988	21.3262	21.8813	21.3457	20.2531	20.6252	21.0901	21.5502	20.7734	20.8399	21.1744	20.9661	20.8295	21.1585	20.9854	21.4992	21.0114	20.9275	21.4675	18.3253	21.3301	SMPDL3A	Q92484	Acid sphingomyelinase-like phosphodiesterase 3a OS=Homo sapiens OX=9606 GN=SMPDL3A PE=1 SV=2	4	41
17.2134	NaN	13.3194	14.8603	13.6314	16.5537	18.4614	13.8024	NaN	16.8166	22.7354	21.8243	17.8243	19.8441	22.1727	14.1691	16.8441	17.341	15.4749	13.8854	NaN	13.9583	NaN	19.6645	19.798	20.4693	21.5928	14.9692	14.9903	16.8001	21.4262	21.4606	22.0612	20.0623	19.0809	NaN	20.4675	14.9064	14.7647	17.7966	15.0094	NaN	20.4939	17.9425	22.4528	NCF1	P14598	Neutrophil cytosol factor 1 OS=Homo sapiens OX=9606 GN=NCF1 PE=1 SV=4	3	36
26.0812	26.165	26.0716	26.3025	26.7922	25.9947	26.1147	26.136	26.1968	26.0009	26.3068	26.3465	26.2722	26.3788	26.2353	26.2119	26.2654	25.8126	26.2957	26.3029	25.8223	26.2845	25.9964	26.1073	26.2179	26.2288	25.894	26.4289	26.6148	26.115	26.3282	26.3036	26.1366	26.2159	26.257	26.414	26.113	26.5004	26.219	26.6058	26.3044	26.4024	26.0907	25.4381	26.2846	ANP32A	P39687	Acidic leucine-rich nuclear phosphoprotein 32 family member A OS=Homo sapiens OX=9606 GN=ANP32A PE=1 SV=1	4	41
25.2093	25.0368	25.3247	25.0687	25.8564	25.4411	25.3649	25.6703	25.5387	25.2934	25.6099	25.6793	25.1775	25.3935	25.3388	25.3212	25.4503	25.2212	25.4679	25.2651	25.3022	25.4522	25.1337	25.5513	25.6177	25.4227	25.1035	25.4762	25.6777	25.5025	25.6049	25.2879	25.4343	25.5025	25.4153	25.4753	25.5106	25.6598	24.9771	25.8203	25.4674	25.5884	25.6482	24.6674	25.6153	ANP32B	Q92688	Acidic leucine-rich nuclear phosphoprotein 32 family member B OS=Homo sapiens OX=9606 GN=ANP32B PE=1 SV=1	4	41
24.2437	24.14	24.2253	23.6263	24.6702	24.3082	24.0166	24.4733	24.3513	24.3015	24.3209	24.6016	24.329	24.2788	24.6888	24.28	24.1523	24.3711	24.3912	24.213	24.3728	24.338	24.347	24.0352	24.196	24.3763	23.9444	24.236	23.9871	24.632	24.2654	23.9577	24.2336	24.6262	24.0344	24.1937	24.3653	24.1819	24.2902	24.4809	24.6148	24.1896	24.4016	23.3934	24.0657	ANP32E	Q9BTT0	Acidic leucine-rich nuclear phosphoprotein 32 family member E OS=Homo sapiens OX=9606 GN=ANP32E PE=1 SV=1	4	41
26.9238	26.8621	26.9537	27.1402	27.2196	27.2962	27.32	27.2224	27.2226	28.7524	27.1893	27.7806	27.4293	27.3709	27.6551	27.7081	27.3645	26.9175	27.0918	27.328	27.1906	27.3195	27.0069	27.0901	27.3034	28.0114	27.1609	27.1723	26.9447	27.4257	27.2831	27.1671	27.3673	27.2893	27.1508	27.7022	27.1725	27.2842	27.1571	27.3602	27.633	28.0154	27.6622	28.6009	27.1736	ACO2	Q99798	Aconitate hydratase, mitochondrial OS=Homo sapiens OX=9606 GN=ACO2 PE=1 SV=2	4	41
26.1547	26.5829	26.2295	26.0723	26.0334	26.5425	26.3222	26.6127	26.5131	25.2991	26.5163	26.264	26.3686	26.3374	26.1151	26.0819	26.4998	26.3157	26.4762	26.1654	26.4645	26.542	26.6389	26.4726	26.6482	25.4087	26.0276	26.0961	26.3914	26.4114	26.4349	26.5279	26.8116	26.3178	26.3987	25.8225	26.1531	26.4586	26.3939	26.3869	25.7815	25.6052	26.5492	24.553	26.2799	AFAP1	Q8N556	Actin filament-associated protein 1 OS=Homo sapiens OX=9606 GN=AFAP1 PE=1 SV=2	4	41
32.6502	32.8952	32.7083	32.7166	32.7183	32.7875	32.8344	32.907	32.9093	32.1826	32.8906	32.8014	32.9604	32.9327	32.8321	32.6838	32.8743	32.8713	32.7223	32.9157	32.8197	32.5537	32.7384	32.7227	32.7891	32.2106	32.8354	32.9022	33.0264	32.8636	32.8417	32.8232	33.0195	32.9443	32.9392	32.6814	32.882	32.7973	33.0691	32.914	32.8216	32.694	32.9634	31.3847	32.7942	ACTA1	P68133	Actin, alpha skeletal muscle OS=Homo sapiens OX=9606 GN=ACTA1 PE=1 SV=1	4	41
27.9543	28.1248	28.5811	28.2034	28.3332	28.2702	28.2125	28.2218	28.1949	28.7292	28.0215	28.393	28.3762	28.1802	28.4693	28.3046	28.222	28.3202	28.2885	28.148	28.3696	28.6761	28.2815	28.2324	28.6643	28.5428	28.3064	28.5594	28.4477	28.3715	28.3516	28.2981	28.3061	28.3965	28.4169	28.3164	28.2452	28.3332	28.1419	28.2863	28.1023	28.6173	28.4679	27.5705	28.1247	ACTA2	P62736	Actin, aortic smooth muscle OS=Homo sapiens OX=9606 GN=ACTA2 PE=1 SV=1	4	41
23.7871	23.0404	22.9424	24.3377	23.6831	24.2817	24.0695	24.1147	24.2304	23.656	23.7817	23.5368	23.8612	23.5433	23.5746	24.0347	23.9168	23.6155	23.2147	23.6683	24.1372	23.6501	24.5733	23.9997	23.9414	22.5442	23.8477	23.5056	23.4974	24.7975	24.4256	23.9424	23.6479	23.2481	24.179	23.7464	24.0384	24.0209	24.1493	23.6948	24.3445	23.8537	24.032	22.4257	24.4454	ACTG1	P63261	Actin, cytoplasmic 2 OS=Homo sapiens OX=9606 GN=ACTG1 PE=1 SV=1	4	41
22.6488	22.634	22.637	22.9148	22.4951	22.1493	22.6223	22.0621	21.9481	21.2387	22.3236	21.8794	22.4077	22.4055	22.18	22.5345	22.1781	22.7015	22.648	22.6562	22.4149	22.3804	22.2691	22.5458	22.2405	21.402	23.6715	22.3832	22.397	22.1449	22.5245	22.3574	22.352	22.6833	22.5085	22.2698	22.1678	22.1649	22.2	22.421	21.8511	22.3365	22.1616	19.942	22.5517	ABLIM3	O94929	Actin-binding LIM protein 3 OS=Homo sapiens OX=9606 GN=ABLIM3 PE=1 SV=3	4	41
20.8668	19.7851	20.055	18.0339	22.1068	25.3962	21.3228	21.164	22.0259	30.1067	24.1481	25.7112	22.5493	21.648	25.6916	28.3019	23.1615	21.332	22.7012	24.6581	24.5121	24.7795	19.9816	21.0694	26.5929	30.6869	25.185	21.6244	19.0461	23.4436	28.03	24.2082	26.5088	24.4942	23.0552	27.5942	24.3033	23.5702	22.4672	22.9454	30.0474	27.1353	22.2342	34.6845	23.8239	AZU1	P20160	Azurocidin OS=Homo sapiens OX=9606 GN=AZU1 PE=1 SV=3	4	41
24.0262	23.7421	23.8852	23.9509	24.4847	23.9697	23.842	24.2414	23.8821	23.7285	24.0343	24.4182	24.1766	24.0737	24.3076	23.7922	23.9809	23.8315	23.7851	23.8144	23.9621	24.3749	23.8604	23.9666	24.0808	24.0891	24.001	24.168	24.2198	24.0373	23.9953	24.0896	24.0524	23.9948	24.0049	24.2259	24.0886	24.2468	23.9932	24.3961	24.1152	24.4681	24.0021	23.4695	24.0725	ACTL6A	O96019	Actin-like protein 6A OS=Homo sapiens OX=9606 GN=ACTL6A PE=1 SV=1	4	41
23.62	23.9916	23.9744	23.5256	23.7396	23.79	23.8468	23.6139	23.8547	23.127	23.7303	23.837	23.6434	23.7845	23.4747	23.9182	23.5934	23.7937	23.7978	23.8617	23.7594	23.8643	23.7898	23.7601	23.6967	23.2567	24.012	23.7718	23.7523	23.7982	23.6958	23.6295	23.5643	23.9773	23.8004	23.627	23.6254	23.6784	23.6323	23.5847	24.0035	23.8761	23.7038	22.2991	23.6629	ACTR10	Q9NZ32	Actin-related protein 10 OS=Homo sapiens OX=9606 GN=ACTR10 PE=1 SV=1	4	41
27.7003	27.6518	27.6917	27.5231	27.6199	27.566	27.5471	27.5895	27.5902	27.2974	27.578	27.5497	27.6002	27.5627	27.6333	27.5962	27.5148	27.6839	27.5766	27.5995	27.6852	27.7202	27.6565	27.7894	27.8337	27.6426	27.5754	27.6919	27.7027	27.5258	27.7861	27.7547	27.6108	27.6337	27.6414	27.6103	27.6731	27.6616	27.5633	27.6063	27.6213	27.5627	27.5415	26.892	27.6999	ACTR2	P61160	Actin-related protein 2 OS=Homo sapiens OX=9606 GN=ACTR2 PE=1 SV=1	4	41
26.9764	26.8461	26.9337	26.9119	26.8364	26.7426	26.5889	26.8363	26.87	26.4278	26.7982	26.8028	26.6742	26.8201	26.7159	26.8334	26.8156	26.9633	26.9217	26.8071	26.9393	26.864	26.8022	26.8921	26.75	26.7235	26.8092	26.7865	26.9447	26.7192	26.7023	26.8536	26.6179	26.8253	26.8145	26.8867	26.7564	26.848	26.744	26.7296	26.7517	26.8341	26.7066	26.1289	26.7602	ARPC1A	Q92747	Actin-related protein 2/3 complex subunit 1A OS=Homo sapiens OX=9606 GN=ARPC1A PE=1 SV=2	4	41
28.368	28.3731	28.3728	28.4089	28.6002	28.5117	28.5261	28.4857	28.5243	28.6065	28.5379	28.5534	28.6028	28.5201	28.7275	28.5146	28.5149	28.4985	28.5056	28.4117	28.5016	28.4172	28.3988	28.4543	28.459	28.4997	28.5083	28.5821	28.6275	28.4548	28.5235	28.5844	28.5723	28.6449	28.5022	28.4483	28.4701	28.4259	28.3965	28.4798	28.3925	28.543	28.4358	27.7314	28.5134	ARPC1B	O15143	Actin-related protein 2/3 complex subunit 1B OS=Homo sapiens OX=9606 GN=ARPC1B PE=1 SV=3	4	41
28.8377	28.8173	28.8654	28.7647	28.858	28.826	28.861	28.842	28.8087	28.6532	28.838	28.8402	28.7589	28.8444	28.9916	28.9122	28.8756	28.8962	28.8519	28.7843	28.8446	28.9037	28.8833	28.8826	28.8229	28.6833	28.8079	28.8409	28.8374	28.8184	28.9601	28.9907	28.876	28.9296	28.8882	28.8043	28.8744	28.8242	28.744	28.9026	28.8526	28.8772	28.8801	28.044	28.912	ARPC2	O15144	Actin-related protein 2/3 complex subunit 2 OS=Homo sapiens OX=9606 GN=ARPC2 PE=1 SV=1	4	41
27.9507	27.8787	28.001	27.8918	27.9029	27.8823	27.8152	27.8523	27.9067	27.7823	28.0113	28.1711	27.8229	27.9497	28.0542	27.907	27.8852	27.8005	27.884	27.8939	27.9206	28.1838	27.846	28.1495	27.9566	27.9281	27.9785	27.999	27.9476	27.9348	27.851	28.1367	27.8925	28.088	27.8173	27.9235	27.9641	27.858	27.8296	27.9979	27.8087	27.9205	27.997	27.0526	27.9576	ARPC3	O15145	Actin-related protein 2/3 complex subunit 3 OS=Homo sapiens OX=9606 GN=ARPC3 PE=1 SV=3	4	41
28.4249	28.4772	28.6068	28.4205	28.4678	28.3842	28.5326	28.5353	28.5195	28.298	28.6139	28.8096	28.4685	28.4525	28.6871	28.446	28.4806	28.4671	28.5631	28.469	28.4193	28.5076	28.5273	28.6996	28.5977	28.5031	28.51	28.3877	28.5618	28.6022	28.4961	28.7207	28.776	28.6562	28.5427	28.488	28.5145	28.5461	28.5781	28.6226	28.6005	28.5715	28.6901	27.7234	28.6528	ARPC4	P59998	Actin-related protein 2/3 complex subunit 4 OS=Homo sapiens OX=9606 GN=ARPC4 PE=1 SV=3	4	41
27.7241	27.7717	27.6803	27.5871	27.5539	27.6396	27.5357	27.7302	27.6387	27.338	27.5427	27.4777	27.4754	27.594	27.645	27.779	27.5825	27.6947	27.6165	27.6283	27.7355	27.8926	27.7612	27.7046	27.5801	27.6896	27.5788	27.6505	27.6831	27.5538	27.6656	27.7161	27.3839	27.5983	27.6738	27.6711	27.6004	27.5193	27.4299	27.5571	27.6136	27.6178	27.6418	26.719	27.6149	ARPC5	O15511	Actin-related protein 2/3 complex subunit 5 OS=Homo sapiens OX=9606 GN=ARPC5 PE=1 SV=3	4	41
25.1203	25.1036	25.378	24.9237	24.8121	24.9692	24.8672	25.0167	25.2265	24.6882	25.1996	25.2717	24.9856	24.7665	24.9864	25.114	24.9295	25.1124	24.9313	25.2058	25.3205	25.4576	25.1747	25.1018	25.1712	25.1893	24.9631	25.0509	24.8019	25.1019	25.0888	25.1485	25.0157	24.7003	24.9393	25.0892	25.1451	24.9936	24.9577	25.0554	25.157	25.1217	24.9627	24.4107	25.2482	ARPC5L	Q9BPX5	Actin-related protein 2/3 complex subunit 5-like protein OS=Homo sapiens OX=9606 GN=ARPC5L PE=1 SV=1	4	41
28.9576	29.1779	29.1103	29.0195	29.1122	29.1021	29.0877	29.1007	29.0839	28.7982	29.0867	29.22	29.2144	29.0624	29.1612	29.152	29.0665	29.0796	29.0653	29.1724	29.1588	29.1109	29.1411	29.2039	29.1088	28.9628	29.0676	29.0195	29.1923	29.1501	29.1387	29.0863	29.0803	29.1742	29.1476	29.0717	29.1028	29.0548	29.0979	29.1071	29.1898	28.9981	29.0432	28.147	29.0852	ACTR3	P61158	Actin-related protein 3 OS=Homo sapiens OX=9606 GN=ACTR3 PE=1 SV=3	4	41
19.887	19.533	20.3737	19.681	19.8331	19.7292	19.7466	19.69	19.6899	19.4234	19.6987	19.7549	19.6081	19.555	19.557	19.4016	19.3421	19.8552	19.2666	19.7228	19.8991	19.8363	20.1229	20.3779	20.688	19.6358	19.5252	19.9734	20.0519	19.9534	20.0602	19.6826	20.0479	20.0897	20.2334	19.8412	20.2573	20.0415	20.1331	20.0545	20.0305	19.8803	20.1186	NaN	19.8931	ACTR3B	Q9P1U1	Actin-related protein 3B OS=Homo sapiens OX=9606 GN=ACTR3B PE=2 SV=1	4	40
24.0099	23.8427	23.8963	23.8098	24.1621	23.9775	23.9784	24.0395	24.1135	24.1935	24.1357	23.9543	23.7958	23.9639	24.1301	24.1475	23.8613	23.9251	23.9049	23.9332	24.2581	24.1831	24.0723	24.279	24.1367	24.518	24.1155	23.9113	23.9176	23.9467	23.9504	23.9587	23.8681	23.8526	23.7835	24.0687	24.0405	23.9496	23.6832	24.0207	24.081	24.1646	23.8376	23.5933	23.8472	ACTR5	Q9H9F9	Actin-related protein 5 OS=Homo sapiens OX=9606 GN=ACTR5 PE=1 SV=2	4	41
18.1376	18.2096	17.9275	18.0833	18.6612	18.3509	18.3792	18.3064	18.4231	18.2189	18.2095	18.4136	18.519	18.1486	18.7293	18.5429	18.1164	18.0979	18.1501	17.8238	18.1325	18.2052	18.2614	18.0733	18.1064	18.3004	18.6829	18.5626	18.6771	18.5311	18.5117	18.1859	18.2661	18.5022	18.3294	18.5741	17.9505	18.1805	18.5688	18.5364	17.6919	18.2519	18.3165	17.4676	18.3685	ACTR6	Q9GZN1	Actin-related protein 6 OS=Homo sapiens OX=9606 GN=ACTR6 PE=1 SV=1	4	41
27.2342	27.3556	27.4177	27.2069	26.9702	27.1373	27.3845	27.1441	27.1687	26.9516	27.6205	27.1115	27.134	27.1411	27.038	27.323	27.2805	27.1686	27.2147	27.2288	27.3443	27.3396	27.3982	27.2792	27.2701	27.4857	27.8676	27.3997	27.3007	27.3916	27.5057	27.5765	27.2513	27.3766	27.3375	27.4522	27.321	27.4329	27.4414	27.4118	27.4395	27.5874	27.3195	26.214	27.7194	SUB1	P53999	Activated RNA polymerase II transcriptional coactivator p15 OS=Homo sapiens OX=9606 GN=SUB1 PE=1 SV=3	4	41
23.0039	22.6772	23.2017	22.6975	22.7373	22.9086	22.9971	22.654	23.2111	22.3775	22.9148	22.8311	22.1826	22.8576	23.1955	22.9229	23.1316	22.898	22.7038	22.8774	22.9477	22.8609	22.7786	22.8137	22.8426	22.3929	23.0613	22.936	23.0735	22.8536	22.9109	22.9891	22.5008	23.1935	23.0825	23.0993	22.907	22.6225	23.0472	23.1901	22.6437	22.7338	22.7346	21.765	23.0687	ASCC2	Q9H1I8	Activating signal cointegrator 1 complex subunit 2 OS=Homo sapiens OX=9606 GN=ASCC2 PE=1 SV=3	4	41
25.4209	25.575	25.6501	25.648	25.4398	25.3857	25.4943	25.5303	25.4944	25.6094	25.3265	25.5219	25.2744	25.4649	25.5672	25.4947	25.4934	25.4314	25.5084	25.571	25.5782	25.6609	25.6877	25.6179	25.6909	25.6639	25.672	25.4907	25.5948	25.6853	25.5832	25.5801	25.3175	25.788	25.7429	25.6262	25.6976	25.6062	25.6738	25.6182	25.7093	25.872	25.6672	24.8968	25.3857	ASCC3	Q8N3C0	Activating signal cointegrator 1 complex subunit 3 OS=Homo sapiens OX=9606 GN=ASCC3 PE=1 SV=3	4	41
22.9628	23.3173	23.4224	22.8574	23.3192	23.3313	23.4102	23.5444	23.5247	23.0731	22.9815	23.031	23.2693	23.184	23.2976	23.2252	23.2113	22.9688	23.165	22.8138	23.2879	22.9512	23.3803	23.0406	23.333	22.9885	23.5774	23.4552	23.3922	23.4321	23.3466	23.2864	23.539	22.8614	23.3878	22.8943	23.6465	22.9691	23.1617	22.8903	22.7821	22.9906	23.3535	21.8352	23.396	TRIP4	Q15650	Activating signal cointegrator 1 OS=Homo sapiens OX=9606 GN=TRIP4 PE=1 SV=4	4	41
NaN	NaN	NaN	17.7253	NaN	NaN	NaN	NaN	NaN	NaN	NaN	NaN	NaN	NaN	NaN	NaN	NaN	NaN	17.4597	NaN	18.0401	17.6264	18.0571	17.414	18.1356	NaN	17.9853	NaN	17.3837	18.0315	18.1538	17.7509	17.273	17.5063	17.8614	17.7988	17.2215	17.5295	17.5653	17.0338	17.7521	18.1808	NaN	NaN	17.772	ATF7IP	Q6VMQ6	Activating transcription factor 7-interacting protein 1 OS=Homo sapiens OX=9606 GN=ATF7IP PE=1 SV=3	1	22
26.2519	26.3872	26.488	26.206	26.3447	26.1188	26.1937	26.2445	26.3629	26.1756	26.3933	26.3467	26.4607	26.2366	26.5289	26.2854	26.4435	26.3966	26.4107	26.356	26.3507	26.4366	26.3304	26.4025	26.2741	26.1474	26.5394	26.393	26.5583	26.6725	26.3785	26.3317	26.2202	26.5045	26.3786	26.3168	26.3016	26.2976	26.4896	26.3132	26.5564	26.3127	26.5261	25.0505	26.4108	AHSA1	O95433	Activator of 90 kDa heat shock protein ATPase homolog 1 OS=Homo sapiens OX=9606 GN=AHSA1 PE=1 SV=1	4	41
21.3304	20.8135	21.3437	21.1299	21.5368	20.814	21.0616	21.3967	21.581	21.4845	21.2812	21.5773	21.0518	20.3837	20.8405	21.1915	20.7476	21.3414	21.2545	20.4493	20.845	21.6427	20.9702	20.0407	20.9754	20.3134	20.7016	21.187	21.039	21.0196	21.3518	21.2342	20.8558	21.4669	21.7711	21.8433	21.4822	21.7301	21.4405	21.9509	21.6007	21.9633	21.7709	20.8315	21.5256	ABT1	Q9ULW3	Activator of basal transcription 1 OS=Homo sapiens OX=9606 GN=ABT1 PE=1 SV=1	4	41
23.3976	23.372	23.2604	23.7486	23.6019	23.4834	23.847	23.534	23.2938	23.9203	23.4637	23.9486	23.0168	23.3516	23.7601	23.6224	23.5567	23.5429	23.2763	23.4238	23.3679	23.357	23.321	23.6307	23.2922	23.991	24.0797	23.6378	23.6732	23.367	23.9407	23.7591	23.6413	23.9069	23.4563	23.6527	23.4535	23.8448	23.6302	23.502	23.9618	24.2747	24.0332	24.4565	23.7992	ABR	Q12979	Active breakpoint cluster region-related protein OS=Homo sapiens OX=9606 GN=ABR PE=1 SV=2	4	41
21.0383	21.1922	20.8177	21.4417	21.3409	21.2536	20.5852	20.7451	21.0405	20.9662	NaN	21.5168	NaN	20.3114	21.1548	21.6992	21.3333	21.3516	20.6583	20.3138	21.7565	21.556	21.7594	21.6424	20.9787	20.3653	21.3414	21.4556	19.49	21.1608	20.5481	20.3885	21.0044	20.7217	20.9528	20.704	21.4527	21.4128	20.2603	21.5671	20.6181	20.5209	20.6748	19.3308	21.1044	ACVR1	Q04771	Activin receptor type-1 OS=Homo sapiens OX=9606 GN=ACVR1 PE=1 SV=1	4	39
19.4921	18.3581	19.5884	19.6046	20.0024	18.6879	19.4799	19.9011	19.9731	19.6254	19.9912	19.934	20.2154	19.5783	20.509	19.7801	20.3019	19.4801	19.8945	18.7554	19.4471	19.5553	19.6123	19.7322	19.9517	20.024	19.3975	19.8204	19.8214	18.9089	19.763	19.5705	19.504	19.8886	20.0073	19.714	19.5249	18.5046	18.5541	19.9052	19.6508	19.8805	19.8349	18.9964	19.8312	ADNP	Q9H2P0	Activity-dependent neuroprotector homeobox protein OS=Homo sapiens OX=9606 GN=ADNP PE=1 SV=1	4	41
22.6796	23.2472	22.6097	20.674	21.8494	22.9661	22.7735	23.5765	22.5467	24.7619	22.7502	23.0127	22.2775	21.9675	24.1311	23.8667	22.7495	22.7043	22.0684	21.7289	22.1171	23.041	22.1451	21.7847	22.3832	23.1823	21.3797	21.9864	21.7349	22.0665	22.3468	22.1325	22.5219	22.849	23.9036	23.2435	21.6993	21.8582	21.8308	22.5432	22.2989	23.4639	22.3208	24.8307	21.8725	NDUFAB1	O14561	Acyl carrier protein, mitochondrial OS=Homo sapiens OX=9606 GN=NDUFAB1 PE=1 SV=3	4	41
25.5061	25.5819	25.6849	25.5573	26.0029	25.8069	25.8286	25.6978	25.7408	25.573	25.8946	25.7356	25.7939	25.7067	25.858	25.8761	25.9115	25.8134	25.6977	25.6918	25.7608	25.82	25.7481	25.7037	25.7025	25.7225	25.757	25.9013	25.9532	25.8387	25.886	25.8934	25.9827	25.7538	25.8904	25.973	25.8379	25.7491	25.8924	25.9329	25.966	26.0087	25.812	25.0287	25.8094	APEH	P13798	Acylamino-acid-releasing enzyme OS=Homo sapiens OX=9606 GN=APEH PE=1 SV=4	4	41
20.9659	20.8775	21.3398	21.3555	21.0717	21.3333	22.1587	21.3707	21.5784	21.048	21.4933	21.7587	20.4974	21.2638	21.5287	21.6215	21.9772	21.2452	20.3068	21.305	22.0889	21.4185	21.2959	21.7423	21.4949	20.8223	23.2484	21.4494	21.6318	21.1229	21.4013	20.9599	22.1865	21.5663	21.4834	20.715	21.3291	21.2938	21.2532	21.3349	20.3848	20.6235	20.6635	20.1498	21.9561	FADS1	O60427	Acyl-CoA (8-3)-desaturase OS=Homo sapiens OX=9606 GN=FADS1 PE=1 SV=3	4	41
25.9986	26.1176	26.096	25.5476	26.4176	27.2044	27.7911	26.518	26.6349	27.7985	27.4269	27.1482	27.2571	26.0283	27.0647	26.5394	26.8218	26.395	26.8217	26.7469	26.275	26.1998	26.3148	26.7509	26.3165	28.2265	28.2064	26.378	26.4779	27.2247	27.5153	26.9175	26.0935	27.622	26.5362	26.5273	26.6516	25.8606	27.0926	26.7558	27.1275	26.2134	26.329	27.1145	27.5536	B2M	P61769	Beta-2-microglobulin OS=Homo sapiens OX=9606 GN=B2M PE=1 SV=1	4	41
21.7812	21.9384	21.8144	21.5668	21.7266	21.5756	21.391	21.536	22.0612	22.7359	21.7609	21.9428	21.7228	21.6535	22.0545	22.2288	22.0512	21.6947	21.6152	21.6883	21.5472	21.6262	21.6459	22.0397	21.8431	22.3584	21.5967	21.9334	21.9102	21.7528	21.9001	21.5359	21.3888	21.6685	21.3934	21.9754	21.6024	21.9258	21.8662	22.1286	22.0142	22.4057	21.668	22.0666	21.6701	ACAD10	Q6JQN1	Acyl-CoA dehydrogenase family member 10 OS=Homo sapiens OX=9606 GN=ACAD10 PE=1 SV=1	4	41
21.412	21.6233	21.612	21.4144	21.5302	21.5393	21.7224	21.1209	21.3421	21.8949	21.354	21.4033	21.3442	21.7434	21.3024	22.1307	22.0157	21.2942	22.2403	21.8058	22.0986	22.0668	21.4521	21.6602	22.0355	22.4107	21.2697	21.8257	21.4145	21.6799	21.3637	22.1783	21.3914	21.7203	21.7851	22.1497	21.6832	21.5606	21.2137	22.0287	22.0681	22.1822	21.2921	21.7177	21.7185	ACAD11	Q709F0	Acyl-CoA dehydrogenase family member 11 OS=Homo sapiens OX=9606 GN=ACAD11 PE=1 SV=3	4	41
20.669	20.5714	20.4031	20.76	20.2081	20.3578	20.5154	20.3941	20.8692	20.2586	21.285	20.5725	20.8163	20.3267	20.4843	21.2805	21.0157	20.6741	20.4917	20.9844	20.397	20.642	20.7768	20.7148	20.8029	21.3348	19.8638	20.7603	20.4546	20.6165	20.9326	20.2997	20.3897	20.4429	20.883	21.3717	20.4943	20.8298	20.8448	20.7278	20.9434	21.1455	20.4646	19.956	20.8552	ACSS3	Q9H6R3	Acyl-CoA synthetase short-chain family member 3, mitochondrial OS=Homo sapiens OX=9606 GN=ACSS3 PE=1 SV=1	4	41
19.6409	20.1119	19.8177	19.6623	19.7082	19.8681	19.5709	18.6396	20.1949	19.0293	19.7942	19.9653	19.453	19.8468	20.502	19.8176	19.5658	19.6943	20.2898	19.9399	19.6253	20.4267	20.1123	20.2571	19.7592	19.9637	19.9963	20.4599	19.8724	19.6093	19.3874	20.1593	21.4066	20.3784	20.248	20.0068	19.7775	19.8001	19.6842	19.7352	19.2795	19.4706	20.3246	20.0279	19.5313	LPGAT1	Q92604	Acyl-CoA:lysophosphatidylglycerol acyltransferase 1 OS=Homo sapiens OX=9606 GN=LPGAT1 PE=1 SV=1	4	41
21.0695	20.9844	20.3555	20.3975	20.968	20.9079	20.9768	21.2188	20.3741	20.9397	21.1844	20.9515	20.7062	20.0878	21.1728	21.0177	21.0699	21.2886	20.8012	20.892	20.9526	21.0571	20.6584	20.8975	20.8227	20.7224	20.0078	21.0646	21.0204	20.7231	19.8578	20.9362	20.733	20.6249	20.7583	20.8065	20.2209	19.5999	20.3446	21.1838	20.7923	20.2077	20.9542	20.1567	19.3561	ACBD6	Q9BR61	Acyl-CoA-binding domain-containing protein 6 OS=Homo sapiens OX=9606 GN=ACBD6 PE=1 SV=1	4	41
26.4348	26.7079	26.8398	26.4075	26.3164	26.7065	26.753	26.3987	26.2926	26.243	26.2163	26.0903	26.1212	26.4153	26.422	26.9329	26.6242	26.4131	26.4082	26.9317	26.9452	26.6218	27.2589	26.6689	26.8831	26.7245	27.1102	26.6735	26.6627	26.9821	26.9413	27.0196	26.6676	26.8275	26.9977	26.901	26.4921	27.1273	26.767	26.6436	26.8123	26.8527	26.6972	25.7475	26.3225	DBI	P07108	Acyl-CoA-binding protein OS=Homo sapiens OX=9606 GN=DBI PE=1 SV=2	4	41
21.7648	21.7883	22.0029	21.5057	22.1092	21.9683	22.0255	21.9661	22.1834	23.3386	22.3626	22.0935	22.1272	21.9023	22.1111	22.1629	22.0395	22.0954	21.933	21.6627	21.8464	21.9002	21.5575	21.8519	22.0788	22.4559	21.86	21.6416	21.5772	21.9308	21.9445	21.8605	21.99	22.0478	21.7839	22.5454	21.7691	21.8426	21.777	22.3166	21.8806	22.2783	21.7078	22.1692	21.8244	ACOT1	Q86TX2	Acyl-coenzyme A thioesterase 1 OS=Homo sapiens OX=9606 GN=ACOT1 PE=1 SV=1	4	41
23.9309	23.5535	24.0041	24.1929	24.3749	24.3759	23.6657	24.1449	24.033	25.2815	23.8746	24.2995	24.064	23.7483	24.5085	24.4157	24.0321	23.882	23.7356	23.885	23.8931	24.4573	23.6357	24.1215	24.1634	24.6336	23.6089	24.3153	23.8463	23.8457	24.1693	24.0846	24.215	23.7739	23.9115	24.3373	24.0905	23.9086	23.6707	24.2981	24.1834	24.6433	23.8146	25.0022	23.7221	ACOT13	Q9NPJ3	Acyl-coenzyme A thioesterase 13 OS=Homo sapiens OX=9606 GN=ACOT13 PE=1 SV=1	4	41
25.161	25.2959	25.3346	24.9843	25.5157	25.1989	25.3524	25.0551	25.413	26.5312	25.307	25.5804	25.2705	25.0362	25.1881	25.5415	25.5207	25.0615	25.3135	25.2534	25.5088	25.1659	25.3161	25.4029	25.1048	25.6078	25.7475	25.1312	25.2112	25.2733	25.1297	25.0611	25.2986	25.2973	25.1929	25.6681	25.0543	25.3346	25.1918	25.2082	24.97	25.4534	25.0047	25.5029	25.0912	ACOT2	P49753	Acyl-coenzyme A thioesterase 2, mitochondrial OS=Homo sapiens OX=9606 GN=ACOT2 PE=1 SV=6	4	41
23.1907	23.6044	23.5454	23.5135	23.3563	23.2868	23.2493	23.2391	22.5844	24.7582	23.4521	23.3641	22.7172	23.3001	23.9092	23.3792	23.2921	23.2318	23.6351	23.5138	23.3782	23.6604	22.5087	23.2836	23.3337	24.1652	23.4438	22.6801	23.3196	22.5568	23.2022	23.6298	23.3522	23.5616	23.225	23.6037	23.0839	23.2502	22.5368	22.4998	23.055	23.6375	23.3064	24.0635	22.9482	ACOT8	O14734	Acyl-coenzyme A thioesterase 8 OS=Homo sapiens OX=9606 GN=ACOT8 PE=1 SV=1	4	41
25.6325	25.2757	25.5397	25.8085	25.5676	25.6416	25.5139	25.3117	25.6	26.5126	25.7127	25.971	25.3469	25.6758	26.0956	25.9272	25.4211	25.5477	25.4417	25.4768	25.4166	25.5385	25.6108	25.5736	25.6084	26.4353	25.5977	25.3676	25.3024	25.7814	25.4095	25.587	25.3124	25.3683	25.6573	25.7227	25.517	25.6586	25.5095	25.2956	25.9802	26.1499	25.5265	26.3489	25.4159	ACOT9	Q9Y305	Acyl-coenzyme A thioesterase 9, mitochondrial OS=Homo sapiens OX=9606 GN=ACOT9 PE=1 SV=2	4	41
19.2942	18.6742	18.817	17.8354	18.9738	18.8784	18.7425	18.3755	18.384	21.3982	18.5471	20.0347	18.919	18.7747	19.477	19.4457	17.8485	18.6951	18.8754	19.0409	19.0292	18.3043	19.0197	19.3237	19.3756	20.0665	18.9715	19.0367	18.892	18.7738	19.1636	18.9281	17.7314	18.6056	19.2447	19.6712	19.0368	18.9645	18.852	18.516	19.3675	19.8199	19.0044	19.774	19.0979	THEM4	Q5T1C6	Acyl-coenzyme A thioesterase THEM4 OS=Homo sapiens OX=9606 GN=THEM4 PE=1 SV=1	4	41
24.712	24.8987	24.5402	24.0824	24.776	24.5265	24.4477	24.4373	24.4723	24.8843	24.5076	24.7931	24.7908	24.625	24.8556	24.823	24.6744	24.6166	24.4674	24.6346	24.6761	24.7394	24.8563	24.6857	24.5484	24.94	24.2299	24.5494	23.8601	24.7388	24.5437	24.671	24.342	24.7301	24.6086	24.788	24.4875	24.6786	24.8846	24.9893	25.0415	24.7057	24.6944	24.5798	24.3226	AGK	Q53H12	Acylglycerol kinase, mitochondrial OS=Homo sapiens OX=9606 GN=AGK PE=1 SV=2	4	41
21.6899	20.3038	21.6233	21.4509	22.0196	21.576	21.6835	21.9243	21.7709	21.6166	22.0577	21.9196	22.0211	20.9302	21.2243	21.1365	21.8923	21.6704	22.1249	21.8743	21.9286	22.118	22.1054	21.8924	21.7875	21.9937	21.8695	22.0863	21.9681	22.2806	22.2659	22.4327	21.8332	22.202	22.2907	22.1472	21.8812	22.2358	22.1222	21.7566	22.0593	21.9427	21.4252	20.9828	22.198	ACYP1	P07311	Acylphosphatase-1 OS=Homo sapiens OX=9606 GN=ACYP1 PE=1 SV=2	4	41
20.7247	21.382	21.305	20.1227	21.5647	21.2102	21.2561	21.3216	21.6703	21.6392	21.2505	20.5881	21.2399	21.1002	21.9033	21.4077	21.6123	21.6082	20.8617	21.7478	21.1493	21.4097	21.4039	21.8028	20.7443	21.1706	21.9472	20.8532	21.7938	21.0332	21.451	21.0867	20.1075	21.1132	21.6	21.3805	21.0369	21.3847	21.7946	22.2071	21.6553	21.7174	20.2718	20.6067	20.678	ACYP2	P14621	Acylphosphatase-2 OS=Homo sapiens OX=9606 GN=ACYP2 PE=1 SV=2	4	41
24.068	24.2293	24.6551	24.8139	25.1528	24.4027	24.6017	24.6262	24.4544	25.1752	24.6106	24.7918	24.763	24.3372	24.997	24.5241	24.3114	24.3994	24.3478	24.7073	24.4033	24.3818	24.212	24.2833	24.4665	24.5333	24.678	24.4716	24.5216	24.865	24.3274	24.4843	24.5226	24.2844	24.6194	24.2891	24.3231	24.3362	24.6234	24.9718	24.7417	24.1891	24.7632	23.9979	24.5542	LYPLA1	O75608	Acyl-protein thioesterase 1 OS=Homo sapiens OX=9606 GN=LYPLA1 PE=1 SV=1	4	41
24.7408	25.1442	24.9119	24.8769	24.414	24.7373	24.951	25.0831	24.6915	24.4018	24.3208	24.6369	24.4439	24.8307	24.9471	24.665	25.125	24.7144	25.0098	24.7907	24.9361	24.9372	25.1871	24.8037	24.7287	24.2057	24.223	24.82	24.648	24.9361	24.7884	24.6867	24.1003	24.6093	24.6139	24.3826	24.3566	24.9113	25.0787	24.5204	24.7714	24.6143	24.6762	23.0845	24.1238	LYPLA2	O95372	Acyl-protein thioesterase 2 OS=Homo sapiens OX=9606 GN=LYPLA2 PE=1 SV=1	4	41
24.5177	24.2058	24.4585	24.2749	24.1782	24.4312	24.3001	24.3266	24.4871	24.6972	24.3714	24.3028	24.262	24.315	24.5159	24.6537	24.294	24.4457	24.3749	24.3081	24.5064	24.4947	24.4066	24.2618	24.3153	24.9438	24.2051	24.2066	24.3771	24.4393	24.3128	24.3397	24.0168	24.4246	24.5093	24.5508	24.3873	24.2142	24.1606	24.2545	24.4225	24.7164	24.0996	24.7663	24.3829	FAHD1	Q6P587	Acylpyruvase FAHD1, mitochondrial OS=Homo sapiens OX=9606 GN=FAHD1 PE=1 SV=2	4	41
23.7662	23.551	24.013	23.806	23.1132	23.2923	23.1626	23.5311	23.6837	21.0086	23.4072	23.2333	23.512	23.7336	23.1786	22.0583	23.5327	23.697	24.0763	23.7679	22.7746	23.6003	23.6855	23.5344	23.8554	21.2703	23.2598	23.5605	24.0787	23.3719	23.3031	24.0324	23.6962	23.7099	23.9231	21.9806	23.7381	23.7239	23.7158	23.8393	22.0802	22.0811	23.8885	21.937	23.7074	ADAMTSL1	Q8N6G6	ADAMTS-like protein 1 OS=Homo sapiens OX=9606 GN=ADAMTSL1 PE=1 SV=4	4	41
16.6226	16.5139	17.0113	17.0314	17.1949	16.8315	16.9493	16.5671	15.803	17.017	16.5513	17.5851	16.7247	17.1193	16.9907	14.8676	16.6442	16.904	16.5484	16.4698	14.4324	16.3872	15.3364	17.0395	17.3106	14.6266	16.7744	16.1497	16.6096	16.4459	16.2881	16.763	16.7468	17.4365	16.3365	13.5973	16.0262	15.5021	16.3499	15.9275	13.8915	NaN	17.4816	13.7484	16.8333	ADAMTSL4	Q6UY14	ADAMTS-like protein 4 OS=Homo sapiens OX=9606 GN=ADAMTSL4 PE=1 SV=2	4	40
25.2154	25.1956	25.239	25.1882	25.0049	25.2265	25.2628	25.0774	25.4247	24.7944	25.2822	24.9621	25.2215	25.1849	25.0672	25.2064	25.2902	25.2786	25.1763	24.9953	25.0884	25.1035	25.14	25.0415	25.1481	24.8369	25.1789	25.1414	25.3079	25.0603	25.2548	25.2403	25.2258	25.3178	25.3149	25.3295	25.0879	25.3148	25.1747	25.283	25.2427	25.2092	25.1975	23.6582	25.2843	CRK	P46108	Adapter molecule crk OS=Homo sapiens OX=9606 GN=CRK PE=1 SV=2	4	41
21.3387	21.164	21.1445	21.2556	20.9849	21.2258	21.3367	20.9149	21.2221	20.9379	21.3598	20.6959	21.361	21.1495	21.134	21.3559	21.3615	21.4466	21.3825	21.4845	21.2439	21.2593	21.192	21.3439	21.1674	21.2322	21.216	21.2407	21.1818	21.5157	21.4333	21.181	21.3161	21.1194	21.3484	21.3039	20.7478	21.1041	21.2561	21.3506	21.3908	21.0601	21.4375	19.7693	21.2553	NECAP1	Q8NC96	Adaptin ear-binding coat-associated protein 1 OS=Homo sapiens OX=9606 GN=NECAP1 PE=1 SV=2	4	41
24.2834	24.7299	24.6396	24.3507	24.5171	24.5903	24.4703	24.4711	24.6392	24.0721	24.955	24.7867	24.629	24.5852	24.6937	24.5379	24.4818	24.5992	24.5713	24.721	24.6633	24.6397	24.786	24.6609	24.562	24.4503	24.0396	24.5955	24.8063	24.7067	24.7986	24.6647	24.6498	24.6116	24.6585	24.4566	24.6987	24.6251	24.8535	24.608	24.5502	24.635	24.6222	23.2615	24.6224	NECAP2	Q9NVZ3	Adaptin ear-binding coat-associated protein 2 OS=Homo sapiens OX=9606 GN=NECAP2 PE=1 SV=1	4	41
26.271	26.5578	26.3596	26.2485	26.924	26.4247	26.4758	26.5197	26.5101	26.3892	26.3976	26.4448	26.5334	26.3313	26.6578	26.3762	26.515	26.4373	26.4175	26.2337	26.3247	26.4334	26.4368	26.5721	26.5711	26.3898	26.2317	26.5814	26.6293	26.3044	26.3211	26.3692	26.2477	26.3282	26.3508	26.2902	26.3694	26.3461	26.246	26.5224	26.2296	26.4262	26.1789	25.8868	26.2633	APRT	P07741	Adenine phosphoribosyltransferase OS=Homo sapiens OX=9606 GN=APRT PE=1 SV=2	4	41
24.0795	23.9311	23.7841	23.6082	23.8705	23.9313	24.005	23.5245	23.8464	24.1879	23.9968	24.0233	23.7907	23.8354	24.118	24.1486	23.5603	23.9401	23.9704	24.0407	24.0655	24.0878	24.0969	23.8367	23.9568	24.1533	24.178	24.1333	23.6122	24.0554	23.9811	24.1963	24.1156	24.04	23.9383	24.2391	24.0919	24.2244	23.9451	24.045	24.1894	24.3992	24.1598	23.5148	24.0448	SLC35B2	Q8TB61	Adenosine 3'-phospho 5'-phosphosulfate transporter 1 OS=Homo sapiens OX=9606 GN=SLC35B2 PE=1 SV=1	4	41
22.1628	22.7203	NaN	NaN	NaN	20.6356	NaN	NaN	NaN	21.4672	NaN	NaN	NaN	22.3668	22.7262	NaN	22.7493	22.278	22.7445	22.6286	22.3407	22.5691	NaN	23.214	22.8448	22.5312	22.2731	NaN	22.1392	23.6844	22.2804	21.8156	22.021	22.2469	22.1242	22.0188	22.2348	NaN	NaN	NaN	24.1185	21.8542	NaN	NaN	NaN	SLC35B3	Q9H1N7	Adenosine 3'-phospho 5'-phosphosulfate transporter 2 OS=Homo sapiens OX=9606 GN=SLC35B3 PE=1 SV=1	2	25
15.3489	NaN	15.6199	15.4331	17.0633	NaN	NaN	NaN	16.2163	15.4619	NaN	18.0292	16.7603	16.6148	NaN	16.9994	NaN	16.2812	NaN	16.2571	15.8562	15.3591	15.3429	NaN	16.081	15.6502	16.7198	15.4928	NaN	NaN	16.2936	14.9942	15.4185	16.4843	15.3434	15.0473	16.7101	17.0457	15.9707	16.5094	16.9475	16.217	15.8854	15.6611	15.3711	BAZ2A	Q9UIF9	Bromodomain adjacent to zinc finger domain protein 2A OS=Homo sapiens OX=9606 GN=BAZ2A PE=1 SV=4	3	31
22.7253	21.2623	22.4717	22.4897	23.6499	23.0505	23.6824	22.9261	22.5719	22.7954	22.5886	22.2546	24.028	22.6952	23.2613	22.0553	23.4342	22.4484	22.8857	23.1515	22.5309	22.7645	22.8966	23.3202	22.7299	23.9583	23.7283	22.9339	23.2458	22.0711	22.997	22.7112	22.3803	23.3003	22.6773	23.7181	23.1417	25.0161	23.1603	23.679	23.2926	23.9839	22.5887	23.543	22.7406	ADA	P00813	Adenosine deaminase OS=Homo sapiens OX=9606 GN=ADA PE=1 SV=3	4	41
20.5227	17.1907	18.4225	17.7961	17.3141	NaN	17.2955	18.371	19.9997	20.6354	17.1639	16.4499	15.3815	18.5154	17.2675	21.1356	20.4111	20.7044	18.8606	20.6149	21.172	21.1208	20.7853	21.2034	19.6024	21.549	21.9493	18.5197	21.4851	21.7799	18.8813	21.3468	21.7135	21.8928	20.9665	22.0238	21.3503	17.4291	21.3206	21.6168	22.0498	22.0954	17.615	22.7176	21.1681	KDELR2	P33947	ER lumen protein-retaining receptor 2 OS=Homo sapiens OX=9606 GN=KDELR2 PE=1 SV=1	4	40
25.3895	25.4251	25.4951	25.3789	25.376	25.3615	25.4425	25.6004	25.6506	25.1961	25.5826	25.3419	25.449	25.3759	25.5339	25.4976	25.4583	25.4637	25.5288	25.533	25.371	25.4054	25.4202	25.3788	25.5007	25.2054	25.7404	25.4894	25.7558	25.5764	25.5808	25.4797	25.4569	25.7063	25.6437	25.6695	25.6572	25.4155	25.5328	25.674	25.4678	25.5948	25.4494	24.416	25.4846	ADK	P55263	Adenosine kinase OS=Homo sapiens OX=9606 GN=ADK PE=1 SV=2	4	41
31.8128	32.1974	31.8829	32.319	31.4834	31.5098	31.5134	31.462	31.6741	32.287	32.4081	31.3835	31.237	31.9633	31.8246	31.6761	31.7131	31.7962	31.8324	31.939	31.4324	31.655	32.0948	31.6316	31.5915	32.2677	31.9029	31.8552	31.9609	31.6092	31.849	31.6696	31.712	31.805	31.4868	32.0266	31.3728	31.9508	31.707	31.5926	31.822	31.8528	31.9463	33.3628	31.408	AHCYL2	Q96HN2	Adenosylhomocysteinase 3 OS=Homo sapiens OX=9606 GN=AHCYL2 PE=1 SV=1	4	41
27.8902	27.6942	27.8052	28.0159	28.115	27.8124	27.7456	27.9221	27.8793	27.7181	27.8246	27.8126	27.9047	27.7939	28.0039	27.8683	27.8922	27.9313	27.8981	27.8802	27.7981	27.9915	27.8291	27.9469	27.9771	27.7183	27.9014	28.041	28.0829	27.8255	27.912	28.0459	27.7065	28.1333	27.9065	27.8936	27.8881	27.8878	27.9062	28.0824	27.9686	28.0334	27.9582	27.2071	27.9181	AHCY	P23526	Adenosylhomocysteinase OS=Homo sapiens OX=9606 GN=AHCY PE=1 SV=4	4	41
20.1802	19.5641	20.1874	19.6034	20.138	19.9848	19.9133	21.333	20.7915	20.4651	20.8961	20.7127	19.9748	20.7778	21.3127	20.1488	19.8498	20.592	20.852	21.0015	19.8483	21.2416	20.0531	19.7363	19.9816	19.5693	19.528	20.8508	19.677	19.9411	20.7522	19.9072	19.6517	19.8726	20.1754	20.3412	19.8694	20.3737	20.1835	20.4348	20.8356	20.7472	19.9699	19.7595	20.1368	ADCY3	O60266	Adenylate cyclase type 3 OS=Homo sapiens OX=9606 GN=ADCY3 PE=1 SV=3	4	41
15.8108	15.6283	15.5297	15.6293	15.9855	16.0609	15.8772	16.1703	15.9128	15.6735	16.0222	16.299	16.1337	15.6017	15.454	15.7846	15.934	15.5735	15.7632	15.3768	15.8735	15.7516	16.031	15.8811	16.0152	15.3533	15.6508	15.8604	15.489	15.79	15.7738	15.8204	15.5348	15.2735	16.051	15.6358	15.8833	15.8156	15.2472	15.9739	15.5914	15.6468	15.356	14.7008	15.939	ADCY6	O43306	Adenylate cyclase type 6 OS=Homo sapiens OX=9606 GN=ADCY6 PE=1 SV=2	4	41
20.0457	20.0631	20.4531	20.4273	19.9616	20.4451	20.1065	20.5082	20.284	20.6715	20.3581	20.8501	20.9263	20.4859	20.4031	20.6226	20.5168	20.5046	20.1388	20.3377	20.3851	20.6727	20.5587	20.2715	20.5839	20.047	19.2563	20.3779	20.6387	20.4647	20.4269	20.5528	20.5715	21.2241	20.4412	20.2706	20.4263	20.393	20.3433	19.9118	20.346	20.2549	20.6533	19.1332	20.3867	ADCY7	P51828	Adenylate cyclase type 7 OS=Homo sapiens OX=9606 GN=ADCY7 PE=1 SV=1	4	41
19.2658	19.4055	19.7721	19.4883	19.1336	19.3465	19.3387	19.4486	19.7162	19.1189	19.4386	19.1386	19.1716	19.2262	19.5687	19.4375	19.4257	19.2477	19.3736	19.3242	19.4757	19.0789	19.3398	19.4336	19.337	19.0637	19.1972	19.3292	19.1411	19.8236	19.5804	19.5831	19.144	19.2623	19.2081	19.2414	19.3929	19.6807	19.6601	19.6697	19.6926	19.3768	19.2989	18.668	19.0547	ADCY9	O60503	Adenylate cyclase type 9 OS=Homo sapiens OX=9606 GN=ADCY9 PE=1 SV=4	4	41
26.5055	26.6348	26.6778	26.4366	26.8441	26.8948	26.7783	26.6291	26.6455	28.0397	26.8647	27.4947	27.0128	26.7895	27.6585	27.3487	26.7201	26.6418	26.6582	26.6317	26.6792	26.9619	26.6059	26.7551	26.8943	27.7769	26.8202	26.836	26.8224	26.6175	27.05	26.9748	26.7071	26.6827	26.6792	26.976	26.5865	26.6096	26.514	26.9988	26.9609	27.2547	26.7392	28.2324	26.6997	AK2	P54819	Adenylate kinase 2, mitochondrial OS=Homo sapiens OX=9606 GN=AK2 PE=1 SV=2	4	41
27.2111	26.9664	27.0254	26.784	26.8123	26.9632	26.9174	26.8863	27.0651	26.7234	26.8551	26.9534	26.8048	26.8247	26.6779	27.2669	26.8492	26.9819	27.1433	26.9072	26.9387	27.2338	26.9397	26.8668	26.8471	26.849	26.5979	26.8733	26.6683	26.7288	26.6261	26.8524	26.8648	26.6652	26.8688	26.9019	26.8008	26.7869	26.7558	26.8891	27.0776	26.8986	26.9367	26.1623	26.9008	AK1	P00568	Adenylate kinase isoenzyme 1 OS=Homo sapiens OX=9606 GN=AK1 PE=1 SV=3	4	41
23.5125	23.9087	23.8047	23.2219	23.6965	23.9067	23.37	23.9575	23.8213	23.2083	23.7353	23.9204	23.7029	23.9005	23.75	23.8354	23.7888	23.6065	23.9102	23.7293	23.837	23.7607	24.099	23.6641	23.8912	23.3258	21.4876	23.5095	23.6724	24.0079	23.6702	23.648	23.6523	23.2128	23.7415	23.5434	23.9997	23.5515	23.7701	23.6836	23.4518	23.5363	23.4533	22.6124	23.2703	AK5	Q9Y6K8	Adenylate kinase isoenzyme 5 OS=Homo sapiens OX=9606 GN=AK5 PE=1 SV=2	4	41
21.5205	21.6387	21.8616	21.923	22.5761	21.1543	21.6435	22.5316	21.2393	22.1412	22.2374	22.2565	22.3995	21.5749	21.7603	21.6393	21.5611	21.7273	22.6346	20.8987	21.1623	21.2758	21.8532	21.5802	21.6844	21.9064	22.5961	22.6612	21.7726	21.5298	21.4519	22.1168	22.5888	21.7694	21.8013	22.0023	21.8409	21.8809	21.578	21.6579	21.7657	21.6425	21.6071	20.9853	20.6948	AK6	Q9Y3D8	Adenylate kinase isoenzyme 6 OS=Homo sapiens OX=9606 GN=AK6 PE=1 SV=1	4	41
25.997	25.9863	26.0482	25.7129	26.1878	25.9729	26.0439	26.337	26.0697	25.6153	26.2088	26.1554	26.2517	25.9306	26.3297	26.1928	26.1727	26.3643	26.1231	26.1443	26.0489	26.1342	25.8616	26.199	26.1928	25.6586	25.8003	25.9079	26.1575	26.2395	25.8943	25.9442	26.0929	26.0801	26.0338	25.8	26.026	25.9085	26.1895	26.1186	26.0182	25.7565	25.8625	24.9153	25.8544	ADSL	P30566	Adenylosuccinate lyase OS=Homo sapiens OX=9606 GN=ADSL PE=1 SV=2	4	41
25.5167	25.4696	25.5404	25.5145	25.7228	25.4895	25.3773	25.4055	25.4943	25.3348	25.4623	25.4208	25.6876	25.5387	25.6947	25.522	25.5765	25.6822	25.4577	25.544	25.7019	25.8155	25.6843	25.7094	25.7594	25.5855	25.6656	25.5622	25.6849	25.5821	25.582	25.5648	25.5102	25.7202	25.6538	25.3908	25.715	25.5181	25.5725	25.6289	25.7333	25.6753	25.5764	24.3362	25.6375	ADSS2	P30520	Adenylosuccinate synthetase isozyme 2 OS=Homo sapiens OX=9606 GN=ADSS2 PE=1 SV=3	4	41
30.0846	30.0204	30.0473	30.2289	30.1826	30.1186	30.115	30.0905	30.1262	29.7496	29.9874	29.9905	30.09	30.1639	30.0187	30.1456	30.0819	30.1114	30.0236	30.0033	30.1608	30.1371	30.099	30.1542	30.0151	29.9006	30.0558	30.2408	30.1502	30.1094	30.2488	30.2425	30.0026	30.1533	30.1363	30.1058	30.2755	30.2456	30.1077	30.0503	30.2303	30.1262	30.0789	29.1286	30.209	CAP1	Q01518	Adenylyl cyclase-associated protein 1 OS=Homo sapiens OX=9606 GN=CAP1 PE=1 SV=5	4	41
25.0068	25.1041	25.2382	24.7472	24.6964	25.014	24.9592	25.0715	25.076	23.922	24.6605	24.6872	24.7844	24.8936	24.9201	24.9196	24.9961	25.1862	25.0603	24.9369	25.0904	25.1913	25.2139	24.9882	25.1063	24.3811	24.6996	24.7761	24.9163	24.7894	24.8269	24.7865	24.7917	24.7181	25.1311	24.608	24.8038	24.9757	24.9759	25.0556	24.8428	24.496	24.8691	22.8553	24.6785	CAP2	P40123	Adenylyl cyclase-associated protein 2 OS=Homo sapiens OX=9606 GN=CAP2 PE=1 SV=1	4	41
21.5026	21.076	20.7542	20.7245	23.8688	22.9921	22.6682	23.1104	23.0671	22.7942	22.8644	22.757	21.6131	21.326	21.4194	21.4603	21.3776	21.8655	21.5399	21.0015	21.0568	21.0851	20.9655	20.7536	20.4813	20.293	20.9435	20.2467	20.5354	20.6805	20.7775	20.7021	20.6301	19.8648	20.7888	20.8372	20.8895	21.1817	20.5378	20.6681	21.0608	21.5719	21.122	19.7399	20.9766	MOCS3	O95396	Adenylyltransferase and sulfurtransferase MOCS3 OS=Homo sapiens OX=9606 GN=MOCS3 PE=1 SV=1	4	41
NaN	NaN	NaN	NaN	NaN	18.4803	NaN	NaN	NaN	NaN	NaN	NaN	NaN	NaN	NaN	NaN	NaN	NaN	NaN	NaN	NaN	NaN	NaN	NaN	NaN	NaN	NaN	NaN	NaN	NaN	NaN	NaN	NaN	NaN	NaN	17.0019	NaN	NaN	NaN	NaN	18.9967	NaN	NaN	NaN	17.5346	ADGRA2	Q96PE1	Adhesion G protein-coupled receptor A2 OS=Homo sapiens OX=9606 GN=ADGRA2 PE=1 SV=2	0	4
16.359	16.0349	16.6463	15.9695	15.7538	16.0984	16.5258	16.4397	16.622	16.0048	16.6419	16.1618	16.0641	16.2407	15.9572	16.1366	16.17	16.144	16.2754	16.0812	16.1286	16.7784	15.9707	16.1423	16.9466	15.8215	16.5864	15.8997	16.3	16.2286	16.3681	15.9788	16.0563	15.9799	16.1391	15.7877	16.3442	16.169	16.3855	16.2042	15.7212	16.4898	16.2917	NaN	16.0813	ADGRA3	Q8IWK6	Adhesion G protein-coupled receptor A3 OS=Homo sapiens OX=9606 GN=ADGRA3 PE=1 SV=2	4	40
23.677	23.3704	23.4924	23.4324	23.6194	23.7918	23.5757	23.5286	23.5833	26.3065	23.6689	24.3683	23.351	23.6216	24.7064	23.5866	23.5754	24.1912	24.2356	23.634	23.559	23.6755	23.5453	23.5707	24.0208	25.6828	23.7835	23.8848	24.0736	23.7837	24.6381	23.9792	24.3413	24.5645	23.402	24.1369	23.9056	23.547	24.007	23.5772	23.8312	24.2265	23.7049	26.0564	23.8318	ADGRE5	P48960	Adhesion G protein-coupled receptor E5 OS=Homo sapiens OX=9606 GN=ADGRE5 PE=1 SV=4	4	41
18.5502	18.4498	16.6406	18.6064	19.095	16.7971	18.3852	18.1944	16.7076	19.6769	18.7617	17.9324	18.2419	16.3084	17.6486	16.6354	18.4802	18.1258	18.1899	16.6806	18.1531	19.4705	18.0867	18.2489	18.4146	18.5679	19.7358	19.1544	18.4231	18.0903	18.2641	19.652	19.0266	18.0836	18.1134	17.5854	19.0073	19.0887	18.4022	19.6139	18.9369	17.7444	18.7293	17.1302	19.6751	ADGRL2	O95490	Adhesion G protein-coupled receptor L2 OS=Homo sapiens OX=9606 GN=ADGRL2 PE=1 SV=2	4	41
18.3352	18.5681	20.1109	18.7429	18.8672	18.8744	18.4847	18.5675	18.5738	17.2795	18.2239	18.4858	18.6188	17.8935	18.0208	18.0048	18.3106	19.192	18.4244	18.2136	18.67	18.7939	18.4384	18.9801	19.3776	18.1291	17.9935	19.1575	18.416	18.5681	18.6059	18.4592	18.1466	18.8205	18.6526	18.1448	18.9256	18.8368	18.8806	18.6201	18.1356	18.5295	18.57	17.0163	18.7491	ADGRL4	Q9HBW9	Adhesion G protein-coupled receptor L4 OS=Homo sapiens OX=9606 GN=ADGRL4 PE=1 SV=3	4	41
25.2125	25.5533	25.2732	25.2215	24.321	24.9569	25.5507	25.5677	25.2922	23.1882	25.7242	25.2628	25.53	24.9489	24.5736	24.073	25.378	24.8702	25.6808	25.3778	24.6786	25.2358	25.333	24.9114	25.4122	22.924	25.3609	25.4453	25.0822	25.3389	25.1525	25.6959	24.7853	25.4969	25.3498	23.845	24.7793	24.7713	25.4853	25.1492	24.0763	23.8164	25.2668	22.3367	25.7344	AEBP1	Q8IUX7	Adipocyte enhancer-binding protein 1 OS=Homo sapiens OX=9606 GN=AEBP1 PE=1 SV=1	4	41
27.5295	27.4302	27.4768	27.6688	27.6185	27.618	27.5962	27.4361	27.54	28.7347	27.5782	27.7196	27.6219	27.4889	28.2271	28.1247	27.6481	27.5843	27.6159	27.6346	27.5554	27.6394	27.3981	27.6101	27.5987	28.8219	27.8285	27.6266	27.5339	27.5744	27.716	27.465	28.6958	27.6266	27.6281	27.91	27.6805	27.5498	27.5122	27.5882	28.1284	28.3373	27.5762	30.8179	27.6234	APMAP	Q9HDC9	Adipocyte plasma membrane-associated protein OS=Homo sapiens OX=9606 GN=APMAP PE=1 SV=2	4	41
22.4752	22.4464	22.8293	22.4821	22.7429	22.399	22.7269	22.6039	22.7279	23.3344	22.6651	22.6636	22.5372	22.612	22.1418	22.8308	22.4673	22.1326	22.3647	22.8416	22.4625	22.59	22.8353	22.695	22.6224	22.941	22.2721	22.5043	22.5027	22.9669	22.7645	22.6087	22.5436	22.1881	22.5667	22.6404	22.4341	22.3679	22.4925	22.0857	22.9178	22.7152	22.4673	23.2673	22.5599	SLC25A4	P12235	ADP/ATP translocase 1 OS=Homo sapiens OX=9606 GN=SLC25A4 PE=1 SV=4	4	41
25.7618	25.5009	25.7199	25.7147	26.1963	26.0033	25.5822	25.9016	25.7393	28.1949	25.9683	26.4868	26.1622	25.9518	26.7074	26.1044	25.8692	25.717	25.6855	25.7097	25.7358	25.8116	25.5954	25.5644	25.8032	26.807	25.7854	26.1559	25.651	25.8093	25.8266	25.6477	25.7914	25.9213	25.699	26.1941	25.3559	25.3865	25.4906	25.8617	25.9464	26.2421	25.757	27.2571	25.7004	SLC25A5	P05141	ADP/ATP translocase 2 OS=Homo sapiens OX=9606 GN=SLC25A5 PE=1 SV=7	4	41
29.3672	29.1185	29.1844	29.3593	29.5149	29.4824	29.3552	29.4	29.3236	31.3703	29.4029	29.5479	29.4323	29.3199	29.8949	29.5834	29.2905	29.2467	29.2596	29.3032	29.234	29.2053	29.1964	29.2569	29.2888	30.214	29.2882	29.3459	29.2339	29.5127	29.4054	29.3354	29.4809	29.4314	29.2134	29.8736	29.2301	29.1795	29.2883	29.4153	29.7865	30.0487	29.3819	30.5852	29.2477	SLC25A6	P12236	ADP/ATP translocase 3 OS=Homo sapiens OX=9606 GN=SLC25A6 PE=1 SV=4	4	41
24.7248	24.9053	24.8493	25.0198	24.9709	25.037	25.1491	24.7898	24.8267	27.03	24.8316	25.5638	25.0826	24.7577	25.7767	25.2714	24.9408	25.0011	24.8503	25.1382	24.97	25.0469	24.8055	25.0415	25.0059	26.0745	25.9614	24.7928	24.8315	24.9511	25.2519	24.7984	25.136	25.2862	24.9683	25.1035	24.9711	24.9783	24.9579	24.8993	25.5072	25.765	24.8463	26.368	25.017	ADPGK	Q9BRR6	ADP-dependent glucokinase OS=Homo sapiens OX=9606 GN=ADPGK PE=1 SV=1	4	41
23.2375	23.3113	23.3961	23.1085	23.1836	23.2766	23.1071	23.0149	23.0559	23.4719	23.2291	23.2045	23.0152	23.1404	23.5509	23.4265	23.2749	23.1477	23.2846	23.2316	23.1443	23.3156	23.0485	23.4172	23.1879	23.5112	22.8579	23.1675	23.1973	23.2454	23.3223	23.3111	23.1564	23.152	23.3294	23.1192	23.0743	23.186	23.0893	23.2916	23.3835	23.5863	23.2294	23.2545	22.9963	ADPRS	Q9NX46	ADP-ribose glycohydrolase ARH3 OS=Homo sapiens OX=9606 GN=ADPRS PE=1 SV=1	4	41
22.3183	22.2435	22.3581	22.1955	23.3513	22.2498	21.5939	22.6197	22.448	23.2714	22.4541	22.6427	22.7625	22.3371	22.7031	22.7018	22.7349	22.0708	22.3443	22.2326	22.3602	22.4404	22.0344	22.1913	22.4516	22.7708	21.3917	22.5417	22.2432	22.2498	21.9264	22.2292	22.3038	22.0026	22.4041	23.2689	22.3985	22.3357	22.2639	23.1554	22.6604	22.9759	22.6628	22.8211	21.6553	MACROD1	Q9BQ69	ADP-ribose glycohydrolase MACROD1 OS=Homo sapiens OX=9606 GN=MACROD1 PE=1 SV=2	4	41
19.0443	18.782	19.697	19.2622	20.1316	19.6492	18.1486	19.8368	18.7665	20.6782	19.7403	19.8327	20.2485	19.1142	20.4287	19.1351	18.7055	18.565	19.1493	19.1978	18.7466	19.6773	17.9777	19.4088	19.1682	19.5179	18.3486	19.6059	22.1011	19.1266	18.7528	20.0885	20.0268	19.9487	20.1389	20.4416	20.4193	19.6862	19.6458	21.2502	19.9356	21.0789	20.3865	19.7764	20.1015	OARD1	Q9Y530	ADP-ribose glycohydrolase OARD1 OS=Homo sapiens OX=9606 GN=OARD1 PE=1 SV=2	4	41
23.0655	23.0599	22.8039	22.8948	22.7455	22.991	23.0367	22.8429	22.933	22.8554	22.8714	22.6727	22.7785	22.7966	22.4421	22.8537	22.798	22.9599	23.081	22.8219	23.0359	22.9821	22.8862	22.5747	22.4585	22.9911	23.2683	23.047	22.614	22.8018	22.6705	22.8246	22.6943	22.5989	23.0444	22.6562	22.9588	22.8636	22.8429	22.4404	22.912	23.4052	22.5864	22.0721	22.6046	NUDT9	Q9BW91	ADP-ribose pyrophosphatase, mitochondrial OS=Homo sapiens OX=9606 GN=NUDT9 PE=1 SV=1	4	41
NaN	NaN	NaN	NaN	19.6673	18.1298	NaN	NaN	NaN	22.2456	NaN	18.7162	18.7734	NaN	21.8682	NaN	NaN	16.1284	NaN	NaN	NaN	17.3912	NaN	NaN	17.6111	18.8586	17.7643	18.8549	NaN	15.8511	18.1128	19.1728	18.6547	18.1144	NaN	17.7211	NaN	NaN	NaN	19.0903	18.9931	19.3466	19.3706	18.9243	17.861	CD38	P28907	ADP-ribosyl cyclase/cyclic ADP-ribose hydrolase 1 OS=Homo sapiens OX=9606 GN=CD38 PE=1 SV=2	0	24
16.3783	16.6134	16.5217	NaN	NaN	NaN	15.8851	NaN	16.0528	NaN	15.6682	16.2643	15.9297	NaN	15.4488	15.5424	15.7582	16.4152	15.8978	NaN	16.35	16.4336	16.3738	16.5769	16.6597	15.6246	15.6661	15.3832	15.8649	15.3632	NaN	15.4999	NaN	NaN	NaN	NaN	NaN	NaN	NaN	15.5699	NaN	NaN	15.227	NaN	15.835	BBS7	Q8IWZ6	Bardet-Biedl syndrome 7 protein OS=Homo sapiens OX=9606 GN=BBS7 PE=1 SV=2	3	24
27.2642	26.883	26.8573	27.2475	27.2617	27.105	26.9638	27.1254	26.9816	26.8891	27.2067	27.2195	26.8732	26.9492	27.2669	26.9632	27.0898	27.3292	27.2641	26.9987	26.8281	27.1433	26.836	26.9881	26.8197	26.5668	27.4134	27.192	27.1564	26.8986	27.1423	27.3341	27.0915	27.2091	26.8545	27.0791	27.3409	27.3142	26.9657	27.1074	26.9524	27.1799	27.0536	26.2028	27.3936	ARF3	P61204	ADP-ribosylation factor 3 OS=Homo sapiens OX=9606 GN=ARF3 PE=1 SV=2	4	41
29.2744	29.1688	29.2984	29.3117	29.3305	29.1649	29.2602	29.201	29.1878	29.1652	29.2252	29.1713	29.1516	29.0718	29.2645	29.2469	29.1725	29.2485	29.1722	29.2148	29.2993	29.4802	29.3119	29.4362	29.3032	29.2167	29.6281	29.3275	29.3311	29.3281	29.4354	29.3381	29.3294	29.3009	29.3176	29.2841	29.3926	29.3219	29.2053	29.3914	29.3128	29.3785	29.2408	29.0024	29.4348	ARF4	P18085	ADP-ribosylation factor 4 OS=Homo sapiens OX=9606 GN=ARF4 PE=1 SV=3	4	41
24.423	23.9017	23.4549	24.3452	23.99	23.6045	23.8256	23.8414	24.3206	23.5402	24.21	23.8715	24.0777	23.8923	24.5895	23.8293	24.1711	24.2886	23.7336	23.7245	24.1919	24.0493	24.1748	24.0177	23.3978	23.1121	23.7397	24.3272	23.9106	24.0427	24.3615	24.0708	24.2848	24.2146	24.1217	23.3394	23.9023	23.9648	23.7987	24.458	24.1333	24.2355	24.3558	18.275	23.7003	ARF5	P84085	ADP-ribosylation factor 5 OS=Homo sapiens OX=9606 GN=ARF5 PE=1 SV=2	4	41
25.8289	25.7293	26.1044	25.9258	25.6942	25.742	25.6374	25.7275	25.7551	25.8015	25.646	25.6903	25.7205	25.7094	25.7394	25.8099	25.7676	25.7853	25.7652	25.8043	25.953	26.0453	25.913	26.0722	26.0542	25.9998	25.6618	26.0389	25.9306	25.9732	25.9579	26.0414	25.838	25.9434	25.8915	26.1335	26.0712	26.0143	25.9682	26.1023	26.1905	26.0913	25.9406	25.4608	26.1089	ARF6	P62330	ADP-ribosylation factor 6 OS=Homo sapiens OX=9606 GN=ARF6 PE=1 SV=2	4	41
24.9821	25.0266	24.8462	24.7731	24.4446	24.5547	24.7544	24.5155	24.5307	24.0359	24.8074	24.4772	24.8349	24.8346	24.6248	25.157	25.1449	25.1255	24.8107	25.1245	24.5314	24.9533	25.0639	25.0891	25.0033	24.3169	25.0736	24.9918	24.6747	24.9734	24.9084	24.8947	24.7997	24.9698	25.334	24.7882	24.8623	24.9728	24.6777	24.9693	24.8119	24.7375	24.6954	22.7453	25.1543	ARFGAP1	Q8N6T3	ADP-ribosylation factor GTPase-activating protein 1 OS=Homo sapiens OX=9606 GN=ARFGAP1 PE=1 SV=2	4	41
24.1949	24.0446	24.0534	23.8883	24.1285	24.2179	24.1677	24.0957	24.1425	23.6885	24.2295	24.2058	24.1558	24.1947	24.1077	24.178	24.178	24.0876	24.1102	24.0425	24.1076	24.1556	24.0735	24.1071	24.0865	23.7787	24.2777	24.2285	24.2081	24.1663	24.2102	24.1287	23.9121	24.102	24.0666	23.8956	23.9475	24.1036	24.113	24.0782	23.8727	23.9838	24.1214	22.1517	24.0852	ARFGAP2	Q8N6H7	ADP-ribosylation factor GTPase-activating protein 2 OS=Homo sapiens OX=9606 GN=ARFGAP2 PE=1 SV=1	4	41
25.3572	25.332	25.4417	25.385	25.4047	25.5058	25.4157	25.4317	25.4708	25.2863	25.5314	25.412	25.4469	25.3728	25.1867	25.3404	24.8819	25.4023	25.3218	24.9356	25.4557	25.4994	25.6006	25.5429	25.37	25.5628	25.7203	25.3017	25.4669	25.2709	25.5179	25.4561	25.079	25.4493	25.3494	25.3587	25.4263	25.3694	25.138	25.2613	25.4163	25.4176	25.2613	23.5329	25.3349	ARFGAP3	Q9NP61	ADP-ribosylation factor GTPase-activating protein 3 OS=Homo sapiens OX=9606 GN=ARFGAP3 PE=1 SV=1	4	41
21.6047	22.5588	22.205	21.8698	22.1283	21.8314	21.7293	21.9364	21.9962	21.5273	21.4026	22.1109	21.5409	21.8808	21.6995	22.0021	21.9436	22.1012	21.8823	21.4106	21.9175	22.1696	22.1358	22.0749	21.9243	21.8487	22.1179	21.6119	22.0231	21.7471	21.0716	21.6247	21.8056	21.9577	22.0854	21.6522	21.6992	21.6899	21.86	22.0977	21.8417	21.6058	21.8289	19.8839	21.7582	GGA1	Q9UJY5	ADP-ribosylation factor-binding protein GGA1 OS=Homo sapiens OX=9606 GN=GGA1 PE=1 SV=1	4	41
18.0039	19.0067	18.6878	17.8668	18.0427	18.9479	19.0551	19.1397	18.4774	18.9743	18.9418	19.0084	18.7438	18.745	19.1857	19.0653	19.0795	19.0531	17.7124	18.8251	18.8529	18.4442	18.8954	18.9098	18.2784	17.7363	19.2797	18.6702	18.8612	18.9597	18.7389	18.7569	18.8829	19.0189	19.11	18.199	18.7895	18.9859	18.9061	19.2331	18.1174	18.7777	19.0631	18.525	19.1002	GGA2	Q9UJY4	ADP-ribosylation factor-binding protein GGA2 OS=Homo sapiens OX=9606 GN=GGA2 PE=1 SV=3	4	41
18.7369	19.6136	19.8929	20.303	19.5962	19.5424	19.1961	19.5299	20.0046	20.035	19.9449	18.9166	19.908	20.0092	18.7155	20.3765	19.6967	20.2189	19.7941	19.2273	20.0389	19.8029	20.2484	19.8659	20.0336	18.7685	19.554	18.7039	18.6323	20.1111	19.8722	19.9258	18.3156	20.1575	19.4189	20.3434	20.3438	19.5516	20.1338	19.9242	20.5037	19.975	19.8463	18.5818	19.9351	GGA3	Q9NZ52	ADP-ribosylation factor-binding protein GGA3 OS=Homo sapiens OX=9606 GN=GGA3 PE=1 SV=1	4	41
25.046	25.2199	25.4781	25.0992	25.1036	24.9103	25.106	24.8604	24.8726	24.9645	24.8999	25.1469	24.9352	24.8589	24.9879	25.0461	24.8762	25.0289	25.1567	24.9496	25.2455	25.471	25.2834	25.462	25.4817	25.4401	25.5352	25.086	25.205	25.0559	25.2208	25.3222	24.7842	25.2186	25.2006	25.2166	25.2807	25.1983	25.1125	25.2973	25.4592	25.4347	25.2129	24.7467	25.4175	ARL1	P40616	ADP-ribosylation factor-like protein 1 OS=Homo sapiens OX=9606 GN=ARL1 PE=1 SV=1	4	41
19.3898	19.1724	19.5069	19.3612	19.3395	19.1083	19.2673	19.1811	19.293	19.2905	19.1611	19.0641	18.7236	18.7296	19.3815	19.2565	19.101	18.9357	19.3739	19.0018	19.0727	19.9138	19.196	19.3353	19.4357	19.6089	18.5704	19.209	19.4145	19.401	19.6536	19.2688	19.3008	19.1816	19.2	19.5313	19.3298	19.1397	19.4621	19.5692	19.7689	19.4225	19.4296	18.9301	19.1727	ARL10	Q8N8L6	ADP-ribosylation factor-like protein 10 OS=Homo sapiens OX=9606 GN=ARL10 PE=2 SV=1	4	41
23.6131	23.8143	23.7496	23.5405	24.0721	23.8478	23.711	23.8915	24.0808	24.0977	23.9206	23.6702	23.7572	23.6554	23.9754	23.8714	23.7931	23.6497	23.8344	23.7774	23.9158	23.9716	23.8058	23.9917	24.0432	24.3152	23.76	23.8638	23.7885	24.0173	23.917	23.9272	23.6445	23.895	24.0269	24.0857	23.8413	23.6504	23.8214	23.8329	23.7049	24.0746	23.9184	23.8151	23.9144	ARL2	P36404	ADP-ribosylation factor-like protein 2 OS=Homo sapiens OX=9606 GN=ARL2 PE=1 SV=4	4	41
21.6906	21.6336	21.6205	21.437	21.4882	19.6828	20.9862	21.1229	21.8352	20.3522	21.9626	20.7283	19.9793	20.8724	21.6627	21.5956	18.5441	21.2547	21.2172	21.7667	20.4742	21.6096	21.6674	21.691	21.1201	21.013	21.2995	21.2252	22.2111	21.43	22.2684	21.8643	21.393	22.1444	21.7595	21.057	21.5563	21.9609	21.4939	22.1136	21.3089	21.584	22.3758	20.3187	21.8049	ARL2BP	Q9Y2Y0	ADP-ribosylation factor-like protein 2-binding protein OS=Homo sapiens OX=9606 GN=ARL2BP PE=1 SV=1	4	41
25.1794	25.002	25.3539	24.7147	25.0707	25.3481	25.1623	24.8946	25.1296	24.7826	24.9084	25.1051	24.9787	24.8823	25.085	25.2067	25.1925	24.9461	25.0533	25.1156	25.1595	25.4285	25.1828	25.0842	25.275	25.0986	25.2081	25.3278	25.228	25.1273	24.828	25.2016	25.0047	24.7945	25.2405	25.1243	25.1414	24.9809	24.9636	25.1717	25.2734	24.8261	25.0227	23.7127	25.097	ARL3	P36405	ADP-ribosylation factor-like protein 3 OS=Homo sapiens OX=9606 GN=ARL3 PE=1 SV=2	4	41
19.2794	20.3439	19.8055	18.8553	20.2665	20.5519	20.7004	20.4025	20.8222	19.2725	20.8175	20.1863	20.7307	20.399	20.4086	19.9292	20.7829	20.2186	20.1087	19.8605	20.01	18.638	20.1104	19.8491	19.8217	19.4832	20.741	20.4152	20.5392	20.1399	20.4666	19.9865	20.5497	19.8918	20.1817	20.0154	19.6397	19.303	19.6291	20.0796	19.6445	18.5526	20.0075	19.5846	19.7027	ARL4C	P56559	ADP-ribosylation factor-like protein 4C OS=Homo sapiens OX=9606 GN=ARL4C PE=1 SV=1	4	41
20.2467	20.2344	20.0347	19.6393	19.9981	19.897	20.3816	20.483	20.0698	20.1061	18.9095	19.6741	18.7247	20.0122	20.7338	20.153	20.8849	19.6773	20.3677	20.2523	19.0129	20.5021	19.983	20.4225	20.1376	19.8396	20.1499	19.4962	19.8174	19.6844	20.0175	20.1111	19.1268	19.6393	20.0654	19.6292	20.2354	20.0046	20.4536	20.0039	20.5141	20.7169	19.9823	18.2812	20.2815	ARL6	Q9H0F7	ADP-ribosylation factor-like protein 6 OS=Homo sapiens OX=9606 GN=ARL6 PE=1 SV=1	4	41
22.5703	22.6708	22.1988	22.874	22.601	22.6488	22.8754	22.3626	22.6022	23.8978	22.73	22.7316	22.5855	22.5307	23.3115	22.5196	22.6563	22.3994	22.6427	22.8138	22.5173	22.2285	22.4297	22.3743	22.3991	23.1243	22.9933	23.1712	22.9177	22.4669	22.9569	22.5257	22.767	22.843	22.5865	22.8033	22.7424	21.9643	22.6711	22.7746	23.0656	22.9254	22.883	23.0462	23.0002	ARL6IP1	Q15041	ADP-ribosylation factor-like protein 6-interacting protein 1 OS=Homo sapiens OX=9606 GN=ARL6IP1 PE=1 SV=2	4	41
20.0696	20.9652	20.1196	19.7151	20.1165	20.5914	20.851	20.3941	NaN	18.6871	20.7579	20.6795	21.1773	19.8278	20.8973	19.7659	20.9281	20.4828	21.1603	20.3143	20.156	20.3721	19.6364	19.8275	20.3408	19.5884	20.03	19.736	19.7146	20.2356	19.9134	19.2825	19.528	19.772	19.9257	20.0093	19.8227	20.1592	19.7554	19.5773	19.5781	19.2757	19.6007	NaN	19.8629	ARL6IP4	Q66PJ3	ADP-ribosylation factor-like protein 6-interacting protein 4 OS=Homo sapiens OX=9606 GN=ARL6IP4 PE=1 SV=2	4	39
26.2131	26.2399	26.3343	26.1967	26.3734	26.0269	26.4275	26.1438	26.2268	26.6539	26.3157	26.6934	26.1384	26.0043	26.4918	26.2709	26.1281	26.2862	26.2167	26.0967	26.3446	26.4278	26.3122	26.3819	26.3039	26.6443	26.3494	26.0497	26.0608	25.8895	26.2336	26.1871	26.1675	26.1911	25.9767	26.1962	26.1168	26.0309	25.9826	26.2453	26.2112	26.3594	26.0778	25.6332	26.1877	ARL8A	Q96BM9	ADP-ribosylation factor-like protein 8A OS=Homo sapiens OX=9606 GN=ARL8A PE=1 SV=1	4	41
25.2709	25.1096	25.3145	25.2182	25.3004	25.1695	25.1014	25.0943	25.1292	25.7359	25.197	25.2881	25.2827	25.0944	25.4846	25.3057	25.1059	25.255	25.0887	25.1189	25.1289	25.2981	25.1119	25.2512	25.4593	25.7078	25.4842	25.2436	25.1129	25.0768	25.5496	25.3809	25.002	25.1473	25.0509	25.3235	25.2119	25.1266	25.0912	25.2431	25.4295	25.5899	25.0581	24.9355	25.2675	ARL8B	Q9NVJ2	ADP-ribosylation factor-like protein 8B OS=Homo sapiens OX=9606 GN=ARL8B PE=1 SV=1	4	41
19.1121	18.8748	18.9368	19.4819	18.9888	19.3057	18.8267	18.8824	19.2064	19.2872	19.1853	18.9386	18.6236	19.035	19.588	19.0966	18.7529	NaN	19.2606	19.0246	18.9484	19.1342	18.9715	19.5346	18.9333	19.3055	19.9956	19.4887	19.3951	NaN	19.7555	NaN	19.2888	19.4016	NaN	19.3374	19.4221	NaN	18.731	19.135	18.9409	19.0058	NaN	19.0122	19.0986	ARFRP1	Q13795	ADP-ribosylation factor-related protein 1 OS=Homo sapiens OX=9606 GN=ARFRP1 PE=1 SV=1	4	35
25.6617	25.4648	25.5998	25.5891	25.5469	25.4496	25.6241	25.5475	25.5006	25.4415	25.6414	25.4286	25.3976	25.4012	25.4841	25.6256	25.5443	25.5421	25.5526	25.4137	25.4983	25.6772	25.6669	25.6483	25.6659	25.6012	25.6336	25.5995	25.6354	25.6299	25.5243	25.7535	25.3594	25.7556	25.8243	25.7282	25.6848	25.6076	25.4463	25.677	25.6926	25.7446	25.6275	24.9856	25.6803	NUDT5	Q9UKK9	ADP-sugar pyrophosphatase OS=Homo sapiens OX=9606 GN=NUDT5 PE=1 SV=1	4	41
17.0107	17.259	15.6856	17.0632	17.3817	15.6527	17.3937	17.3697	17.3777	16.9324	17.2202	17.4854	17.1628	15.4119	17.727	16.8255	17.5767	17.1908	16.9173	15.3793	17.3888	17.3909	17.0374	17.5476	17.6196	17.4031	17.5102	17.1189	17.2566	17.1652	17.0153	16.6978	15.4664	17.3907	15.4125	15.4433	15.7424	17.0015	15.3483	16.9194	15.2147	16.6725	16.2426	NaN	15.5564	ACD	Q96AP0	Adrenocortical dysplasia protein homolog OS=Homo sapiens OX=9606 GN=ACD PE=1 SV=4	4	40
23.7253	23.4885	23.5352	24.0014	23.3972	23.9109	23.9954	23.7868	23.7694	23.869	23.7367	23.4465	24.0596	23.6086	23.8725	23.559	23.6812	23.6993	23.901	23.7874	23.636	23.6648	23.4556	23.4579	23.5422	23.662	23.8987	23.5307	23.6974	23.7013	23.5729	23.4829	23.6793	23.8003	23.7298	23.5975	23.3397	23.5657	23.5459	23.6295	23.5056	23.4323	23.7574	22.9608	23.4634	FDX1	P10109	Adrenodoxin, mitochondrial OS=Homo sapiens OX=9606 GN=FDX1 PE=1 SV=1	4	41
19.1557	19.379	19.6232	19.3131	19.235	19.0623	18.9978	19.7138	19.1806	19.9137	19.9253	19.6735	19.3498	19.1464	18.6087	19.0388	19.1292	19.3639	19.0981	18.9921	19.8978	19.8839	20.0689	19.2557	19.071	19.9863	18.6042	18.787	19.4176	19.1917	18.5117	19.2618	19.4955	18.7817	19.2577	18.4871	18.4316	19.0252	16.6511	18.8779	19.2116	19.3911	18.5866	NaN	19.6189	AFF4	Q9UHB7	AF4/FMR2 family member 4 OS=Homo sapiens OX=9606 GN=AFF4 PE=1 SV=1	4	40
17.6978	18.6357	20.2231	18.5385	23.206	19.932	20.0621	21.323	18.3985	22.298	20.9571	22.1879	22.2235	21.8024	24.4805	21.5802	22.4595	19.373	19.216	20.3497	17.5951	21.3364	19.4397	20.6408	20.6142	20.4659	20.7303	22.2715	19.7712	18.7158	22.6055	20.8659	22.0033	22.0135	19.1208	22.6979	22.6186	21.361	20.8298	22.0312	20.9489	21.2622	22.3429	23.3567	22.5193	INPP5D	Q92835	Phosphatidylinositol 3,4,5-trisphosphate 5-phosphatase 1 OS=Homo sapiens OX=9606 GN=INPP5D PE=1 SV=2	4	41
25.1397	25.0763	25.1898	25.1057	25.4743	25.2541	25.0845	24.9971	25.2416	26.8712	25.3621	25.7041	25.2971	25.1525	25.8254	25.6157	25.4003	25.2067	25.3062	25.2833	25.0956	25.3081	25.0816	25.1163	25.4983	26.1073	25.2431	25.2789	25.1227	25.3448	25.1925	25.2555	25.3047	25.3874	25.2105	25.9754	25.3154	25.0242	25.0847	25.736	25.7464	26.2368	25.3545	26.4306	25.0762	AFG3L2	Q9Y4W6	AFG3-like protein 2 OS=Homo sapiens OX=9606 GN=AFG3L2 PE=1 SV=2	4	41
25.9535	25.9384	25.5915	25.863	25.8533	25.8974	25.9776	25.8063	25.828	25.7708	25.9679	25.8754	26.0155	25.8897	26.0107	25.838	25.9621	25.8734	25.7551	25.7606	25.8148	25.966	25.6514	25.8287	25.6975	25.9	25.7128	26.0885	25.8043	25.6298	25.7342	25.9784	25.8445	26.0078	25.902	25.9907	25.7551	25.8554	25.8566	26.1152	25.5761	25.8701	25.8247	25.6648	25.8202	AKR7A2	O43488	Aflatoxin B1 aldehyde reductase member 2 OS=Homo sapiens OX=9606 GN=AKR7A2 PE=1 SV=3	4	41
13.3917	16.2958	13.7886	NaN	18.6042	14.399	14.0832	15.047	13.8758	13.9431	14.6515	16.1449	16.99	17.2135	18.0402	13.609	17.68	17.0811	16.9913	16.4819	16.4146	13.9662	15.6219	16.0401	17.3802	12.7126	13.7148	16.5137	17.4133	16.5964	16.5157	16.3538	16.3998	17.5733	16.9816	17.3975	17.1905	16.7873	16.0793	18.4785	16.89	16.8171	17.3281	14.3405	16.2736	SCML2	Q9UQR0	Sex comb on midleg-like protein 2 OS=Homo sapiens OX=9606 GN=SCML2 PE=1 SV=1	3	41
24.5235	24.3624	24.2636	24.2077	24.3258	24.2299	24.3189	24.5754	24.1963	24.046	24.373	24.3382	24.4187	24.2997	24.4013	24.2748	24.135	24.4345	24.3031	24.2416	24.2693	24.3509	24.2689	24.3706	24.2544	24.4059	24.5822	24.2289	24.4087	24.131	24.2582	24.2604	24.1462	24.2335	24.3558	24.2486	24.4699	24.2492	24.1854	24.4494	24.3005	24.5014	24.2386	23.4406	24.3825	AIP	O00170	AH receptor-interacting protein OS=Homo sapiens OX=9606 GN=AIP PE=1 SV=2	4	41
18.4131	19.7102	19.6342	16.4756	18.697	18.5159	20.2866	19.674	18.66	19.1128	20.1159	19.954	19.6113	20.0445	19.4698	18.7449	19.853	19.883	20.3183	19.3844	18.9124	16.4481	20.7301	19.7817	19.208	19.0043	20.1952	19.0514	19.3632	16.3143	19.211	19.5686	20.5034	19.0763	19.3047	16.1255	18.7042	16.6293	18.6109	19.9134	16.4392	17.8453	19.863	NaN	19.6806	AKAP10	O43572	A-kinase anchor protein 10, mitochondrial OS=Homo sapiens OX=9606 GN=AKAP10 PE=1 SV=2	4	40
19.7936	19.6441	19.0613	19.837	20.0278	19.5669	19.8958	19.9966	19.6444	19.6294	19.557	19.677	19.5763	20.07	19.7195	19.8656	20.1288	19.7097	19.8484	19.6884	19.8921	19.4583	19.8778	19.852	19.6716	19.9619	19.9424	20.1453	20.4371	20.0649	19.7816	18.5683	19.8745	19.5009	19.8844	19.6113	18.4653	19.786	19.7012	19.5981	20.0035	19.5935	18.8948	18.7668	19.6784	AKAP11	Q9UKA4	A-kinase anchor protein 11 OS=Homo sapiens OX=9606 GN=AKAP11 PE=1 SV=1	4	41
27.8457	27.7998	27.8464	27.7227	27.4896	27.9246	27.7566	27.6655	27.7872	26.784	27.7003	27.519	27.5186	27.7229	27.4858	27.8016	27.6934	27.85	27.7791	27.9043	27.9489	27.7423	27.8523	27.809	27.7165	27.0015	27.5622	27.7544	27.746	27.892	27.8517	27.7373	27.4012	27.7226	27.8392	27.5175	27.7443	27.7855	27.8111	27.6441	27.5219	27.3926	27.7343	26.1113	27.6992	AKAP12	Q02952	A-kinase anchor protein 12 OS=Homo sapiens OX=9606 GN=AKAP12 PE=1 SV=4	4	41
22.1936	21.1916	21.6172	20.6469	21.6069	21.2954	21.7857	20.9859	21.1194	21.5062	21.5425	21.7897	21.0163	21.3241	20.5817	21.8791	21.0975	21.4365	21.0781	21.3937	21.3138	21.8401	21.9032	22.1706	21.6359	21.3236	21.1606	20.9288	20.9924	22.3117	21.5244	21.6711	20.9094	21.2393	21.7224	21.501	21.3709	20.9433	22.0695	22.2929	21.3599	21.8028	22.224	18.6168	22.1429	AKAP13	Q12802	A-kinase anchor protein 13 OS=Homo sapiens OX=9606 GN=AKAP13 PE=1 SV=2	4	41
27.9468	28.0287	28.2476	28.4914	27.9278	27.7982	28.123	28.1037	27.9245	27.5519	27.8472	27.7792	27.9556	28.03	28.0378	28.1422	27.8199	28.0364	28.0202	28.1382	27.8756	28.0694	28.3139	28.3212	28.3897	28.1291	28.6891	28.5034	28.527	28.4167	28.2985	28.3428	28.2292	28.2379	28.3699	27.8358	27.9459	27.8555	27.9785	27.9428	27.6748	27.7316	27.8163	27.0774	27.7652	AKAP17A	Q02040	A-kinase anchor protein 17A OS=Homo sapiens OX=9606 GN=AKAP17A PE=1 SV=2	4	41
16.9683	20.0299	20.4406	20.7111	16.6534	19.9481	20.6538	19.7829	19.7264	17.2244	20.2683	17.2373	20.3052	20.1498	19.7358	20.5442	20.2836	19.6094	20.4341	20.8708	19.6425	19.3599	16.5735	20.4243	19.5571	18.4066	20.6306	19.883	20.9144	19.7687	20.4953	20.1637	20.8326	20.9534	20.5528	20.6665	20.9364	20.6195	18.0916	19.4582	21.1618	21.5306	20.5988	17.3348	20.142	AKAP8	O43823	A-kinase anchor protein 8 OS=Homo sapiens OX=9606 GN=AKAP8 PE=1 SV=1	4	41
20.8715	21.0676	21.137	21.4742	21.0199	20.7806	21.4126	21.0388	21.2848	21.3868	21.2252	21.2669	20.9787	21.1642	20.9946	21.1101	20.9775	20.9797	20.8753	20.9324	21.0119	20.7005	21.0658	21.1209	21.0995	21.9603	20.7835	20.9775	21.09	20.9657	21.343	21.5434	20.9527	21.0357	21.3879	21.4918	21.2754	21.1066	20.8801	21.5377	21.8088	21.7037	21.1608	20.9401	21.2033	AKAP8L	Q9ULX6	A-kinase anchor protein 8-like OS=Homo sapiens OX=9606 GN=AKAP8L PE=1 SV=4	4	41
23.3875	24.0368	23.8128	23.4229	23.5886	23.6946	23.7087	23.5945	23.6968	23.2892	23.8854	23.9286	23.5348	23.679	23.8246	23.731	24.1824	23.7939	23.6764	23.619	23.8164	23.7209	23.9119	24.0161	23.7718	23.1583	24.0472	23.746	23.7973	23.8453	23.9593	23.4907	24.0269	23.7521	23.6506	23.7051	23.5412	23.7227	23.6437	23.6802	23.4958	23.216	23.6604	22.331	23.5524	AKAP9	Q99996	A-kinase anchor protein 9 OS=Homo sapiens OX=9606 GN=AKAP9 PE=1 SV=4	4	41
19.8014	19.9388	19.9911	19.698	19.6212	19.7917	19.361	20.702	19.8936	18.7883	19.5931	19.6934	20.574	19.48	19.8434	19.3865	19.9197	19.8213	19.8854	20.2849	19.753	20.0668	20.0222	20.5828	20.296	18.7728	19.1344	19.6139	19.8354	20.1514	19.9528	19.9674	20.4195	19.729	20.6188	19.4998	19.9497	20.488	20.7527	19.9729	20.2041	19.5481	19.9323	18.3393	20.243	AKTIP	Q9H8T0	AKT-interacting protein OS=Homo sapiens OX=9606 GN=AKTIP PE=1 SV=1	4	41
26.5981	27.4961	27.0844	26.6593	25.9471	25.7615	26.28	26.0453	26.4209	25.9404	26.4465	26.3848	26.0116	26.5311	26.4673	26.7503	26.6805	26.4585	26.7475	26.619	26.9618	26.9239	27.4743	27.0688	26.8854	26.3677	26.4872	26.4777	26.7692	26.5747	26.5636	26.7247	26.8252	27.0995	26.7597	26.5777	26.9939	26.9009	26.9267	26.8789	27.0619	26.829	27.2175	25.4064	26.495	AAAS	Q9NRG9	Aladin OS=Homo sapiens OX=9606 GN=AAAS PE=1 SV=1	4	41
20.3499	20.3648	20.2635	20.0523	20.0144	19.2435	19.7787	20.0567	20.2041	19.211	19.5606	20.1311	20.1597	19.3947	20.0283	20.2593	20.1342	20.3434	20.3545	20.4738	20.146	20.3418	20.4434	20.3989	20.204	19.3918	19.0045	19.9317	20.3771	20.2054	20.019	19.986	20.1329	19.606	20.3495	20.1649	19.572	19.9012	20.1722	20.0865	20.0975	20.1236	20.1564	17.1572	19.8906	GPT2	Q8TD30	Alanine aminotransferase 2 OS=Homo sapiens OX=9606 GN=GPT2 PE=1 SV=1	4	41
28.0429	28.1079	28.0962	28.0069	28.0043	28.0302	28.0795	28.0801	28.2726	27.4366	28.0858	27.9869	28.1352	28.1043	27.6862	28.0987	28.224	28.1147	28.1584	28.0102	28.2068	28.1757	28.1983	28.1073	28.0671	27.3116	27.5931	28.1685	28.1632	28.2828	28.2025	28.1367	28.0873	28.1796	28.2586	27.9686	27.8921	28.1778	28.1829	28.1917	27.9218	27.8702	28.0481	25.9299	28.1553	AARS1	P49588	Alanine--tRNA ligase, cytoplasmic OS=Homo sapiens OX=9606 GN=AARS1 PE=1 SV=2	4	41
21.9834	22.3256	22.3178	22.3712	22.8127	22.4908	22.5901	22.8143	22.4527	24.1093	22.6061	23.3353	22.5955	22.149	22.5917	22.6453	22.532	22.0575	22.3726	22.0333	22.3717	22.4536	22.154	22.4905	22.4273	22.7054	21.4464	22.0215	22.1637	22.3855	22.2122	22.3298	22.0516	22.6614	22.3855	22.8645	22.037	22.3494	22.0444	22.6471	22.4989	23.2663	22.2304	23.3498	22.2295	AARS2	Q5JTZ9	Alanine--tRNA ligase, mitochondrial OS=Homo sapiens OX=9606 GN=AARS2 PE=1 SV=1	4	41
23.628	23.6266	23.5932	23.4548	23.5121	23.5535	23.2486	23.5684	23.4795	23.3625	23.5565	23.2988	23.6497	23.7936	23.7767	23.2774	23.8568	23.725	23.6836	23.4539	23.5259	23.6416	23.663	23.5832	23.8528	23.5171	23.1273	23.8397	23.7473	23.806	23.205	23.4016	23.3674	23.5968	23.5731	23.441	23.4249	23.4677	23.471	23.5663	23.4728	23.6556	23.5323	22.4897	23.3212	AARSD1	Q9BTE6	Alanyl-tRNA editing protein Aarsd1 OS=Homo sapiens OX=9606 GN=AARSD1 PE=1 SV=2	4	41
27.5816	27.6521	27.7372	27.4476	27.537	27.3727	27.3822	27.4513	27.5701	27.2749	27.5966	27.6343	27.4625	27.5151	27.5597	27.5361	27.5538	27.5112	27.5063	27.5642	27.6982	27.7594	27.7492	27.6925	27.7066	27.4973	27.6308	27.6183	27.6171	27.5608	27.4703	27.6344	27.6209	27.5262	27.657	27.6563	27.7392	27.6278	27.6033	27.7279	27.5641	27.7116	27.5656	26.7708	27.4845	ADH5	P11766	Alcohol dehydrogenase class-3 OS=Homo sapiens OX=9606 GN=ADH5 PE=1 SV=4	4	41
NaN	NaN	NaN	NaN	NaN	NaN	NaN	NaN	NaN	NaN	NaN	NaN	NaN	NaN	NaN	NaN	NaN	NaN	NaN	NaN	NaN	NaN	NaN	NaN	NaN	NaN	18.9581	NaN	NaN	NaN	NaN	NaN	NaN	NaN	NaN	NaN	NaN	NaN	NaN	NaN	NaN	NaN	NaN	NaN	NaN	ALDH1A3	P47895	Aldehyde dehydrogenase family 1 member A3 OS=Homo sapiens OX=9606 GN=ALDH1A3 PE=1 SV=2	0	1
24.3646	24.2223	24.1962	24.1585	24.6418	24.5479	24.4641	24.4097	24.2405	24.5442	24.5527	24.6171	24.4947	24.4049	24.7343	24.6088	24.5388	24.6117	24.5605	24.4936	24.4076	24.3621	24.2537	24.2417	24.3445	24.1606	24.337	24.2926	24.6106	24.3062	24.7184	24.2285	24.6467	24.8059	24.4159	24.5493	24.4872	24.3733	24.614	24.5197	24.2281	24.452	24.534	23.7247	24.5755	ALDH16A1	Q8IZ83	Aldehyde dehydrogenase family 16 member A1 OS=Homo sapiens OX=9606 GN=ALDH16A1 PE=1 SV=2	4	41
24.0065	24.2732	24.1549	24.3623	24.3693	24.2834	24.1611	24.2105	24.2137	25.5334	24.4063	24.5853	24.4288	24.5087	24.6175	24.8435	24.3533	24.0764	24.1534	24.3459	24.4003	24.1789	24.2802	24.1773	24.3148	25.1996	23.871	24.0988	23.8386	24.0746	23.9663	24.205	24.5982	24.2014	24.2643	24.7951	24.3153	23.9349	24.2427	24.1786	24.7618	24.8656	24.1393	25.4041	24.0877	ALDH3A2	P51648	Aldehyde dehydrogenase family 3 member A2 OS=Homo sapiens OX=9606 GN=ALDH3A2 PE=1 SV=1	4	41
NaN	19.3161	NaN	NaN	18.2325	18.4781	18.5763	18.9849	19.8585	20.1143	20.141	20.7284	17.4738	19.5615	20.8757	NaN	NaN	17.8096	18.1544	NaN	18.4562	NaN	NaN	NaN	NaN	18.1257	18.8302	19.535	NaN	18.8772	NaN	20.4707	21.2553	18.7376	17.9701	17.9598	17.7412	NaN	NaN	NaN	18.5583	NaN	18.8192	20.4901	18.5501	ALDH3B1	P43353	Aldehyde dehydrogenase family 3 member B1 OS=Homo sapiens OX=9606 GN=ALDH3B1 PE=1 SV=1	1	28
24.7385	24.8601	24.9747	24.7777	25.3377	24.8849	24.6513	24.8468	25.1771	26.6625	25.0878	25.4517	24.987	24.8651	24.9457	25.3789	25.1455	24.716	25.1254	24.9876	24.9236	24.8858	24.9371	25.047	25.0898	25.4899	24.5797	25.1361	24.9294	24.9553	25.0289	25.0096	24.8307	25.0643	25.0619	25.5112	25.1548	25.0974	24.8368	25.3987	25.3524	25.7809	24.9197	25.4849	24.9725	ALDH1B1	P30837	Aldehyde dehydrogenase X, mitochondrial OS=Homo sapiens OX=9606 GN=ALDH1B1 PE=1 SV=3	4	41
19.3369	19.6304	19.2588	20.4129	21.0061	19.7269	14.3308	19.307	19.7824	20.7462	18.9559	20.0428	19.9647	19.905	20.6961	21.7225	19.8124	19.2897	20.3496	20.5132	20.5992	20.8941	19.5352	18.8212	19.7999	19.9101	NaN	20.5881	19.0443	19.4298	18.2112	19.7225	20.052	19.4636	19.1882	22.2948	20.5019	20.3139	19.316	19.4732	21.9915	22.2573	19.2458	21.0949	17.3739	ALDH3A1	P30838	Aldehyde dehydrogenase, dimeric NADP-preferring OS=Homo sapiens OX=9606 GN=ALDH3A1 PE=1 SV=3	4	40
25.8061	25.8599	25.7716	25.8743	25.8963	26.0135	25.9205	26.233	25.9491	27.4224	25.9611	26.2296	25.7866	25.8834	26.1339	26.581	26.0896	25.8997	25.9392	26.0536	25.7958	25.9414	25.7004	25.8322	25.8304	26.9671	25.5326	26.0669	25.8006	26.5086	25.6961	25.7799	25.7503	25.6755	25.7283	26.2251	25.896	26.0033	25.9033	26.1495	26.109	26.8813	25.5605	27.3001	25.7788	ALDH2	P05091	Aldehyde dehydrogenase, mitochondrial OS=Homo sapiens OX=9606 GN=ALDH2 PE=1 SV=2	4	41
26.493	26.433	26.4546	26.3678	26.6773	26.5505	26.6498	26.5845	26.6109	26.4316	26.6401	26.572	26.573	26.5186	26.7373	26.561	26.5592	26.484	26.5853	26.4157	26.5098	26.5857	26.3182	26.5244	26.4861	26.4284	26.6275	26.5851	26.6456	26.3916	26.5203	26.5308	26.3791	26.6265	26.5779	26.5612	26.4813	26.5489	26.4327	26.5558	26.4231	26.5485	26.2697	25.4198	26.4342	AKR1A1	P14550	Aldo-keto reductase family 1 member A1 OS=Homo sapiens OX=9606 GN=AKR1A1 PE=1 SV=3	4	41
29.5516	29.8683	29.7087	30.0686	29.4421	29.515	29.677	29.3422	29.4521	29.8187	29.7698	29.39	29.2995	29.6455	29.5982	29.6032	29.5886	29.6291	29.6036	29.7996	29.3594	29.6148	29.6827	29.6905	29.3758	30.0314	30.4035	29.8851	30.0343	29.7251	29.7838	29.7133	29.6262	29.9614	29.5865	29.8973	29.4495	29.6248	29.4724	29.5366	29.6834	29.7576	29.658	30.4065	29.4545	AKR1B1	P15121	Aldo-keto reductase family 1 member B1 OS=Homo sapiens OX=9606 GN=AKR1B1 PE=1 SV=3	4	41
20.8497	20.1516	19.803	21.1857	21.2584	20.1363	20.5102	19.6893	20.0068	23.1094	19.9899	20.7482	20.3699	19.7872	20.5426	21.4373	19.9338	20.0645	20.0185	20.3037	20.1101	20.5707	20.2768	19.8985	19.6068	23.8399	20.4304	20.1361	20.0864	19.5665	19.924	16.3404	20.4664	20.3875	20.3453	23.1981	20.2659	20.5066	17.9874	18.8582	22.9616	23.142	20.2518	25.6288	20.0801	AKR1B10	O60218	Aldo-keto reductase family 1 member B10 OS=Homo sapiens OX=9606 GN=AKR1B10 PE=1 SV=2	4	41
27.709	27.6045	27.665	27.9641	27.9357	27.5195	27.5733	27.2154	27.2277	28.2315	27.3891	27.8226	27.3818	27.7138	27.8425	27.9952	27.5131	27.7188	27.4897	27.7668	27.4904	27.6788	27.5096	27.6844	27.4877	28.6567	27.9663	27.5838	27.5989	27.2649	27.6102	27.7088	27.8351	27.6799	27.5557	28.4085	27.7573	27.7276	27.3609	27.7682	28.2637	28.2681	27.4299	28.3118	27.496	AKR1C1	Q04828	Aldo-keto reductase family 1 member C1 OS=Homo sapiens OX=9606 GN=AKR1C1 PE=1 SV=1	4	41
23.1636	22.981	22.8172	22.9208	22.9028	22.8875	22.9825	22.8428	22.8936	23.6553	22.4586	23.1989	22.4308	22.7267	23.1156	23.3119	23.0482	22.8871	23.251	22.836	22.9886	23.1411	22.9796	23.1044	22.917	23.9959	22.6135	22.6581	22.498	22.5515	22.6476	22.8888	22.7232	22.4037	22.784	23.455	22.7291	22.7151	22.379	23.0174	23.4125	23.3808	22.7656	23.7489	22.7369	AKR1C2	P52895	Aldo-keto reductase family 1 member C2 OS=Homo sapiens OX=9606 GN=AKR1C2 PE=1 SV=3	4	41
24.7539	24.5322	24.6252	24.6536	24.6662	24.362	24.3785	24.334	24.3975	24.7714	24.0544	24.3968	24.2383	24.6093	24.8023	24.9708	24.8732	24.4889	24.5009	24.9801	24.7294	24.6196	25.1029	24.2994	24.5697	25.159	24.5001	24.8033	24.854	24.799	24.7468	24.6525	24.4508	25.1093	24.5725	25.0817	24.8328	24.6661	24.8334	24.9391	25.189	25.2274	24.196	24.5063	24.9519	AKR1C3	P42330	Aldo-keto reductase family 1 member C3 OS=Homo sapiens OX=9606 GN=AKR1C3 PE=1 SV=4	4	41
24.1979	24.0809	24.2257	23.9174	23.2871	23.8695	23.9816	23.6038	23.8303	22.9953	23.7898	23.5863	23.839	23.7373	23.4971	24.158	23.9938	23.9839	23.9692	24.1099	24.2834	24.0921	24.2189	24.2421	23.958	23.9548	23.4253	23.8487	23.8522	23.9602	24.0335	23.989	23.8043	23.8514	23.862	23.52	23.8155	23.8358	24.0502	23.8103	23.8087	23.4214	23.945	23.5843	23.9358	ALPL	P05186	Alkaline phosphatase, tissue-nonspecific isozyme OS=Homo sapiens OX=9606 GN=ALPL PE=1 SV=4	4	41
18.8558	15.3496	16.9573	17.1489	20.1005	21.2672	18.2863	18.8598	19.2078	25.5547	19.0704	23.5189	19.9266	18.3937	22.9972	22.6372	19.8602	17.6047	17.7159	19.9668	20.1622	18.9607	NaN	19.2622	24.6517	26.6845	20.6036	18.3681	17.5522	17.3007	23.8771	19.75	23.4745	17.5623	22.5925	18.2499	20.9572	18.0032	16.2081	19.1543	23.0057	17.037	16.5016	30.125	18.6203	BPI	P17213	Bactericidal permeability-increasing protein OS=Homo sapiens OX=9606 GN=BPI PE=1 SV=4	4	40
25.4488	25.1434	25.2498	25.4322	25.5393	25.3922	25.3596	25.3096	25.3448	26.5481	25.5432	25.7451	25.3286	25.3055	25.7638	25.6299	25.4312	25.4698	25.3307	25.2523	25.4655	25.2371	25.3648	25.3863	25.449	26.0782	25.5285	25.4237	25.2183	25.4162	25.2369	25.444	25.3697	25.3184	25.3427	25.6659	25.4243	25.1303	25.0771	25.4695	25.612	25.8942	25.5551	26.6831	25.3533	AGPS	O00116	Alkyldihydroxyacetonephosphate synthase, peroxisomal OS=Homo sapiens OX=9606 GN=AGPS PE=1 SV=1	4	41
18.4434	18.4316	18.4453	18.0643	17.5933	19.0778	18.2533	18.3642	19.1701	20.1707	18.7977	18.9689	19.2226	17.4383	19.4418	19.0883	18.7297	19.0292	18.6162	19.0751	18.6671	18.7433	18.636	18.467	18.7866	19.6168	17.6088	18.003	18.0727	19.2636	18.286	17.9199	17.873	18.4975	17.879	18.6369	17.9306	18.0412	18.7362	18.1549	16.8549	18.6629	NaN	19.014	18.8378	PDSS2	Q86YH6	All trans-polyprenyl-diphosphate synthase PDSS2 OS=Homo sapiens OX=9606 GN=PDSS2 PE=1 SV=2	4	40
15.9205	NaN	NaN	NaN	NaN	17.8791	18.1666	NaN	NaN	21.5257	18.6741	19.2076	17.8112	NaN	19.9545	16.0686	NaN	17.294	NaN	NaN	NaN	17.2496	NaN	NaN	23.9674	22.7782	18.9776	NaN	18.2254	18.3508	23.5223	20.4952	17.9877	17.5258	NaN	NaN	NaN	15.7368	17.1465	16.9875	17.7376	17.2976	17.7763	24.8682	19.1905	AIF1	P55008	Allograft inflammatory factor 1 OS=Homo sapiens OX=9606 GN=AIF1 PE=1 SV=1	1	27
23.9296	23.8914	24.0745	24.2908	24.2472	24.2556	24.2894	23.9011	23.9154	24.2869	24.1814	24.2486	23.972	24.0894	24.0516	24.3186	23.8642	23.914	23.916	24.1136	24.1045	24.0394	24.0139	24.0668	24.0159	24.3852	24.4568	24.1208	23.8728	24.1578	24.2471	24.17	24.0595	24.1457	24.1326	24.2978	24.0995	24.0335	23.959	24.0457	24.1318	24.2899	24.0569	23.3904	24.3067	RETSAT	Q6NUM9	All-trans-retinol 13,14-reductase OS=Homo sapiens OX=9606 GN=RETSAT PE=1 SV=2	4	41
20.998	21.0849	20.7625	20.2041	21.1272	20.1178	18.967	21.1597	21.0457	18.9303	20.9197	19.4458	19.9974	20.4281	21.3252	21.1751	21.1962	20.804	20.4696	21.1329	20.117	21.4134	20.6496	19.9892	20.3277	19.4655	20.8128	20.7109	21.0644	21.3961	21.1007	20.5861	20.9413	21.0837	20.6656	20.1867	20.9422	20.1916	21.2631	20.9678	20.8865	20.1382	21.033	NaN	21.1151	AAGAB	Q6PD74	Alpha- and gamma-adaptin-binding protein p34 OS=Homo sapiens OX=9606 GN=AAGAB PE=1 SV=1	4	40
21.1648	20.8742	21.6051	20.7335	20.4005	20.7666	21.5297	21.4196	21.4223	21.8882	21.4995	21.4237	20.9295	20.8294	21.2551	21.4617	21.0629	21.2922	21.0001	21.4524	21.3724	21.4811	21.2641	20.829	21.1207	21.7129	21.4874	21.0756	21.0938	21.4525	21.2986	21.2786	20.9738	21.0176	21.1451	21.57	21.3531	21.0562	21.2468	21.1744	21.8328	21.4623	20.9352	20.2182	21.4727	FUT11	Q495W5	Alpha-(1,3)-fucosyltransferase 11 OS=Homo sapiens OX=9606 GN=FUT11 PE=1 SV=1	4	41
22.7558	22.4714	22.3223	22.7042	22.6405	22.5037	22.8832	23.1648	22.1284	23.2739	22.9299	22.7945	22.3619	22.8278	22.5673	22.7939	22.4083	22.4828	23.0206	22.5907	23.2364	22.3665	22.7104	22.6468	22.7463	23.6396	23.7165	23.3106	22.5578	22.3135	22.722	22.5522	22.973	23.1155	22.7443	23.1173	22.4559	22.5931	22.6531	22.5492	23.0237	23.419	22.3059	22.9839	23.0984	FUT8	Q9BYC5	Alpha-(1,6)-fucosyltransferase OS=Homo sapiens OX=9606 GN=FUT8 PE=1 SV=2	4	41
20.1634	NaN	NaN	20.6507	19.3129	NaN	19.9517	19.4787	19.2104	NaN	NaN	20.2506	NaN	19.5477	20.3636	20.7518	NaN	19.2931	NaN	19.9342	19.989	NaN	19.2448	19.7584	20.3998	19.5037	NaN	19.7393	20.0417	NaN	19.7127	20.3678	21.0763	19.8205	20.0264	19.8514	19.8139	NaN	19.9614	NaN	20.2915	19.7024	19.9192	NaN	19.5395	ABHD17A	Q96GS6	Alpha/beta hydrolase domain-containing protein 17A OS=Homo sapiens OX=9606 GN=ABHD17A PE=1 SV=1	2	29
17.301	17.3329	NaN	17.6249	17.017	17.4395	17.3013	22.4554	22.2593	NaN	17.1604	22.3757	18.1167	22.4937	22.2729	22.4977	22.5267	22.6172	17.4944	16.4057	NaN	17.8563	22.3451	22.5543	22.1209	NaN	22.3822	22.8296	22.2891	NaN	16.7654	22.512	NaN	22.5431	22.5525	NaN	NaN	22.5472	NaN	22.4116	22.3538	NaN	17.9463	NaN	NaN	CAMK4	Q16566	Calcium/calmodulin-dependent protein kinase type IV OS=Homo sapiens OX=9606 GN=CAMK4 PE=1 SV=1	3	30
20.4576	21.5246	21.1804	21.5138	21.1107	21.2841	21.1976	21.0933	20.3135	22.0777	21.2004	21.3435	21.1448	20.3359	21.5324	21.0835	21.2263	21.3438	20.8551	21.2735	21.1597	21.2704	21.1879	21.3009	20.4602	21.6291	21.5844	21.1814	21.278	21.0043	21.4253	21.132	20.9654	21.4021	21.2375	20.3508	21.577	21.321	21.2126	21.1301	21.6934	21.4637	21.2101	21.3146	21.2909	ALG9	Q9H6U8	Alpha-1,2-mannosyltransferase ALG9 OS=Homo sapiens OX=9606 GN=ALG9 PE=1 SV=2	4	41
24.0125	23.8586	23.8022	24.1639	23.7465	23.7868	23.9372	23.7941	23.9815	23.8476	23.8369	23.9309	23.6289	23.7722	23.962	23.8032	23.9044	24.0223	24.0781	23.7947	23.7757	23.975	23.8416	23.9132	23.705	23.7177	24.3826	24.0337	23.9484	23.8691	24.042	23.8319	23.8734	24.0602	23.6529	24.0713	23.902	23.8634	23.9258	23.8314	24.2023	24.2113	23.6318	23.4764	23.9837	ALG2	Q9H553	Alpha-1,3/1,6-mannosyltransferase ALG2 OS=Homo sapiens OX=9606 GN=ALG2 PE=1 SV=1	4	41
24.2112	24.6354	24.2314	24.6097	24.539	24.5529	24.8073	24.4169	24.707	25.3946	24.7541	24.6676	24.616	24.5357	24.9289	24.5681	24.9217	24.5884	24.44	24.3896	24.5757	24.3365	24.2711	24.827	24.8767	25.045	25.3186	24.7005	24.6382	24.6558	24.8045	24.333	24.8147	24.6354	24.3637	24.6054	24.2846	24.4735	24.5767	24.3322	24.4445	24.5924	24.3748	24.7744	24.6817	MGAT1	P26572	Alpha-1,3-mannosyl-glycoprotein 2-beta-N-acetylglucosaminyltransferase OS=Homo sapiens OX=9606 GN=MGAT1 PE=1 SV=2	4	41
NaN	15.4497	NaN	16.3578	NaN	14.8996	NaN	NaN	NaN	NaN	NaN	16.1804	NaN	NaN	16.2188	NaN	15.8031	15.8482	15.7275	16.7894	16.767	15.7377	NaN	14.5622	NaN	NaN	16.0002	NaN	15.2372	NaN	16.4543	16.6231	15.5364	16.2205	NaN	15.7839	16.3556	16.3114	16.8993	16.5261	17.8262	16.8475	16.862	15.0427	16.1016	MGAT4B	Q9UQ53	Alpha-1,3-mannosyl-glycoprotein 4-beta-N-acetylglucosaminyltransferase B OS=Homo sapiens OX=9606 GN=MGAT4B PE=1 SV=1	2	26
23.0716	23.1497	23.1379	23.4425	23.5383	23.5903	23.7799	23.4384	23.4606	24.9406	23.4437	23.4248	23.1647	23.1753	23.6003	23.4812	23.2207	23.2764	23.3819	23.0324	23.231	23.1939	23.0438	23.5281	23.5487	24.1015	24.1057	23.2626	23.3478	23.2311	23.5399	23.2332	23.3962	23.3665	23.4267	23.3158	23.311	23.0748	23.2825	23.1733	23.4852	23.7388	23.3077	24.4427	23.118	MGAT2	Q10469	Alpha-1,6-mannosyl-glycoprotein 2-beta-N-acetylglucosaminyltransferase OS=Homo sapiens OX=9606 GN=MGAT2 PE=1 SV=1	4	41
26.39	25.7419	26.0628	26.1473	26.5119	26.8706	26.9683	26.4138	26.2308	29.7371	26.9023	27.9576	28.1256	26.3943	28.8807	27.3822	27.006	26.7926	26.6404	26.4814	26.9147	27.233	26.3828	26.1764	27.2484	28.6098	27.0998	26.8886	26.776	26.7814	27.326	26.787	27.6093	27.0195	26.6499	27.8744	26.2874	28.5283	26.6754	27.6938	28.1709	29.1776	26.8414	30.916	26.3441	CAT	P04040	Catalase OS=Homo sapiens OX=9606 GN=CAT PE=1 SV=3	4	41
17.9185	NaN	18.5445	18.884	NaN	NaN	18.3069	18.2815	NaN	22.8899	17.8247	17.8805	18.2042	18.1472	19.8052	20.3904	NaN	NaN	17.8361	18.5266	18.1522	18.7632	18.625	18.1517	18.5367	22.3871	18.1896	17.167	NaN	NaN	NaN	NaN	21.4326	NaN	19.5106	17.6856	NaN	18.5618	NaN	18.1805	NaN	NaN	19.6986	23.8586	18.2379	ORM1	P02763	Alpha-1-acid glycoprotein 1 OS=Homo sapiens OX=9606 GN=ORM1 PE=1 SV=1	3	27
24.4869	24.6218	24.575	24.8037	24.9814	23.9536	23.7467	24.1931	24.0706	26.6532	24.4897	24.6169	24.1515	24.5299	25.0289	24.5344	24.5821	24.0506	24.8449	24.6989	24.0489	24.489	24.9418	24.4457	24.6398	25.8988	24.9775	25.0541	25.0899	24.7549	24.557	25.0584	25.1451	25.2291	25.042	25.3293	24.9262	24.9363	25.103	25.0094	25.0172	25.7324	25.2913	26.9113	24.1651	SERPINA3	P01011	Alpha-1-antichymotrypsin OS=Homo sapiens OX=9606 GN=SERPINA3 PE=1 SV=2	4	41
24.8144	24.8354	24.9542	25.09	26.5781	25.3525	25.1881	25.0433	24.7459	27.1158	24.9895	25.4512	24.9278	24.9581	26.2217	25.2113	24.9472	24.9715	24.8091	24.7652	24.9366	24.6194	24.8528	25.1294	25.7461	27.0119	25.6065	24.8998	25.0841	24.9675	25.4639	24.9766	27.2871	24.992	24.9626	25.2297	25.1354	24.6741	24.5398	24.8149	24.7498	26.4224	24.8407	29.315	24.5007	SERPINA1	P01009	Alpha-1-antitrypsin OS=Homo sapiens OX=9606 GN=SERPINA1 PE=1 SV=3	4	41
NaN	NaN	NaN	NaN	NaN	NaN	NaN	NaN	NaN	NaN	NaN	NaN	NaN	NaN	NaN	NaN	NaN	NaN	NaN	NaN	NaN	NaN	NaN	18.0253	NaN	NaN	NaN	NaN	NaN	NaN	NaN	NaN	NaN	NaN	NaN	NaN	NaN	NaN	NaN	NaN	NaN	NaN	NaN	NaN	NaN	A2M	P01023	Alpha-2-macroglobulin OS=Homo sapiens OX=9606 GN=A2M PE=1 SV=3	0	1
27.6974	26.5798	26.7244	26.7583	26.8986	26.9536	26.832	26.8872	26.9585	27.3515	26.9373	26.4839	26.9349	26.8582	26.8411	26.9967	26.7004	26.724	27.2468	26.6114	26.7413	26.6878	27.1565	26.6922	27.1255	27.1894	26.8787	26.7769	26.5341	26.4898	26.7821	26.7779	26.6486	26.8037	26.6423	28.6256	26.5644	26.5443	26.5034	27.7667	27.1762	26.974	26.7062	28.5647	26.7353	LRPAP1	P30533	Alpha-2-macroglobulin receptor-associated protein OS=Homo sapiens OX=9606 GN=LRPAP1 PE=1 SV=1	4	41
23.0204	23.1154	23.8399	22.946	23.4489	23.9535	23.3455	23.4606	23.3905	22.9576	23.0771	23.2295	23.7046	23.0092	22.9161	23.409	22.7462	23.2892	22.921	23.2893	23.3021	22.8542	23.5031	22.8822	23.0998	22.3183	22.8059	22.5966	22.8022	23.6216	23.0263	23.0446	23.1486	23.2356	23.3818	23.0907	23.3214	22.818	23.3761	22.9584	23.5785	22.8195	22.9787	21.9619	22.7776	ACTN1	P12814	Alpha-actinin-1 OS=Homo sapiens OX=9606 GN=ACTN1 PE=1 SV=2	4	41
15.1502	16.3809	NaN	NaN	15.301	NaN	15.3746	NaN	NaN	NaN	15.4784	NaN	15.8494	NaN	NaN	15.1633	16.0503	14.8611	NaN	15.7926	16.1969	16.5179	NaN	NaN	NaN	NaN	NaN	NaN	NaN	NaN	NaN	NaN	NaN	NaN	NaN	NaN	NaN	NaN	NaN	NaN	NaN	NaN	NaN	NaN	NaN	ACTN2	P35609	Alpha-actinin-2 OS=Homo sapiens OX=9606 GN=ACTN2 PE=1 SV=1	2	10
31.7469	31.7771	31.8716	31.5914	31.5138	31.6632	31.6264	31.6448	31.668	31.1656	31.4019	31.6167	31.598	31.5847	31.5167	31.7536	31.7145	31.7149	31.6955	31.7835	31.8261	31.7251	31.7507	31.7473	31.7852	31.4601	31.3413	31.5294	31.6071	31.9405	31.6681	31.584	31.5262	31.5662	31.6821	31.5612	31.6709	31.6458	31.8857	31.5303	31.8821	31.5168	31.5828	30.5363	31.6018	ACTN4	O43707	Alpha-actinin-4 OS=Homo sapiens OX=9606 GN=ACTN4 PE=1 SV=2	4	41
25.2908	25.2496	25.1206	25.2158	24.9721	25.2959	25.2181	25.5091	25.5237	24.8502	25.3524	25.2493	25.4074	25.5399	25.2707	25.4156	25.744	25.2801	25.3413	25.1558	25.4987	25.2326	25.3482	25.472	25.3936	25.2877	25.0593	25.2976	25.5024	25.7803	25.6583	25.336	25.7416	25.3448	25.4646	25.1573	25.351	25.4086	25.4696	25.309	24.7268	25.1662	25.2239	24.3055	25.2603	ADD1	P35611	Alpha-adducin OS=Homo sapiens OX=9606 GN=ADD1 PE=1 SV=2	4	41
21.8699	21.4764	22.0297	21.6479	20.9739	21.7199	21.7383	21.5038	21.4584	21.7209	21.676	21.6151	21.3846	21.6384	21.3057	22.3759	21.4989	21.4492	21.6371	22.1168	21.7538	21.8531	21.8264	21.9409	21.6899	22.2898	21.5399	21.8428	21.6299	22.3254	21.9672	21.256	21.626	21.7554	21.2784	22.52	21.3342	21.2183	21.7443	21.2571	21.6697	21.9675	21.5906	22.1783	21.8682	AASS	Q9UDR5	Alpha-aminoadipic semialdehyde synthase, mitochondrial OS=Homo sapiens OX=9606 GN=AASS PE=1 SV=1	4	41
NaN	NaN	NaN	NaN	23.1314	NaN	NaN	20.3004	NaN	NaN	NaN	NaN	NaN	NaN	NaN	NaN	NaN	NaN	NaN	NaN	NaN	NaN	NaN	NaN	NaN	NaN	NaN	24.6631	NaN	NaN	NaN	NaN	NaN	NaN	NaN	NaN	NaN	NaN	NaN	NaN	NaN	NaN	NaN	NaN	NaN	AMY1A	P0DUB6	Alpha-amylase 1A OS=Homo sapiens OX=9606 GN=AMY1A PE=1 SV=1	0	3
27.36	27.405	27.5842	27.2458	27.4438	27.5648	27.7001	27.6054	27.4049	27.1626	27.5438	27.571	27.5079	27.5411	27.3547	27.5628	27.4065	27.4377	27.3759	27.5898	27.6155	27.6374	27.44	27.4568	27.4743	27.3098	27.5543	27.4749	27.4736	27.5111	27.4717	27.2959	27.3881	27.3534	27.5607	27.4816	27.5447	27.4919	27.4156	27.4356	27.6718	27.4365	27.372	26.2455	27.5945	ACTR1A	P61163	Alpha-centractin OS=Homo sapiens OX=9606 GN=ACTR1A PE=1 SV=1	4	41
25.2899	25.5096	25.325	25.4106	25.314	25.351	25.3141	25.3178	25.4598	25.3826	25.2312	25.2398	25.3176	25.3884	25.2367	25.6332	25.4294	25.648	25.4242	25.3284	25.463	25.293	25.5326	25.2876	25.1047	25.2188	25.0943	25.2361	25.3892	25.305	25.3898	25.1581	25.6971	25.1311	25.3628	25.5708	25.1856	25.3852	25.5803	25.3227	25.6649	25.382	25.2493	25.5148	24.9731	CRYAB	P02511	Alpha-crystallin B chain OS=Homo sapiens OX=9606 GN=CRYAB PE=1 SV=2	4	41
23.6491	23.7379	23.7968	23.7053	23.674	23.7233	23.769	23.8693	23.8734	23.357	23.9465	23.7652	23.8345	23.8882	23.415	23.8227	24.0215	23.6841	24.0327	23.9304	24.0707	24.0648	24.0176	23.8769	24.001	23.5171	23.7901	24.1379	23.7848	23.963	23.9515	23.988	23.9725	23.8074	24.1431	23.8311	24.0441	23.9082	23.7521	24.0433	23.9499	23.901	24.1426	22.9662	23.9385	ENSA	O43768	Alpha-endosulfine OS=Homo sapiens OX=9606 GN=ENSA PE=1 SV=1	4	41
31.2603	31.0626	31.1577	31.1478	31.5615	31.365	31.2705	31.4185	31.3138	30.7918	31.4182	31.2351	31.2332	31.2512	31.2081	31.2676	31.1904	31.2357	31.2886	31.2859	31.2601	31.3422	31.222	31.2594	31.2227	31.0035	31.3285	31.4148	31.5389	31.3187	31.4298	31.5446	31.3367	31.5061	31.4348	31.2995	31.4546	31.4232	31.2686	31.4432	31.3417	31.3011	31.3737	30.4067	31.5278	ENO1	P06733	Alpha-enolase OS=Homo sapiens OX=9606 GN=ENO1 PE=1 SV=2	4	41
22.3569	22.1412	21.7901	22.2473	21.4911	22.2318	22.4121	22.1854	22.3108	22.7462	21.9898	22.177	21.9748	21.8946	22.0338	22.362	22.5263	22.2437	22.0786	21.7832	22.1592	22.1924	22.1506	22.3878	21.716	23.4153	23.1531	22.1005	22.1772	22.5542	22.4089	22.3708	20.7515	22.4584	22.3281	22.1807	22.3934	21.8766	22.1026	21.6523	22.5357	22.486	21.9513	21.7504	22.5514	GLA	P06280	Alpha-galactosidase A OS=Homo sapiens OX=9606 GN=GLA PE=1 SV=1	4	41
22.2586	22.5279	22.2295	22.4138	22.7567	22.8513	22.3052	22.877	22.7309	22.4338	22.4255	22.8527	22.2976	22.443	22.8493	22.7511	22.6285	22.677	22.3626	22.6076	22.5217	22.4362	22.3919	22.7386	22.709	22.2725	22.9273	22.609	22.5925	22.5686	22.3339	22.3127	22.5979	22.8602	22.6176	22.5825	22.4401	22.3396	22.4698	22.6638	22.4853	22.4691	22.4242	21.7059	22.4919	TFCP2	Q12800	Alpha-globin transcription factor CP2 OS=Homo sapiens OX=9606 GN=TFCP2 PE=1 SV=2	4	41
17.7297	18.615	18.6591	18.9007	17.0415	NaN	NaN	17.6752	19.3574	NaN	NaN	NaN	17.6597	17.1269	19.2896	17.6345	18.4677	NaN	19.3978	NaN	18.8229	19.045	18.5695	18.1955	18.6209	18.1799	NaN	NaN	NaN	18.8832	18.3353	NaN	NaN	17.9943	NaN	19.0928	NaN	NaN	18.1602	NaN	17.4661	18.0328	NaN	NaN	NaN	INA	Q16352	Alpha-internexin OS=Homo sapiens OX=9606 GN=INA PE=1 SV=2	4	22
19.9791	20.7593	20.1114	19.9632	20.5127	20.5528	20.4146	20.5829	20.5747	19.9145	20.6921	20.8899	20.386	20.6767	20.9591	20.4677	20.8125	20.2967	20.2428	20.3866	20.5768	20.1992	20.6773	20.7581	20.9332	20.7468	20.218	20.5871	20.7077	20.2676	20.0216	19.6859	20.4164	19.5816	20.3593	20.4067	19.9882	20.6863	20.3177	22.2876	20.36	19.8531	20.0885	19.4186	20.1813	ALKBH4	Q9NXW9	Alpha-ketoglutarate-dependent dioxygenase alkB homolog 4 OS=Homo sapiens OX=9606 GN=ALKBH4 PE=1 SV=1	4	41
22.3397	22.3897	21.8014	22.46	22.5582	22.161	22.1873	22.269	22.4281	22.3945	22.3269	22.3576	21.9474	22.1021	22.7311	22.0522	22.5061	22.189	22.022	22.3934	21.9492	22.2509	22.1567	22.6028	22.6784	22.2099	22.3074	22.3268	22.4206	22.264	21.806	22.2712	21.9538	22.4704	22.5187	22.1441	21.6388	22.1774	22.0876	22.2719	22.4001	22.5841	22.4923	21.1374	22.0881	FTO	Q9C0B1	Alpha-ketoglutarate-dependent dioxygenase FTO OS=Homo sapiens OX=9606 GN=FTO PE=1 SV=3	4	41
22.9884	22.3406	23.5065	22.7375	22.0724	22.8029	22.6506	22.2422	22.4947	22.7448	22.6603	22.5315	22.781	21.8059	22.7571	22.6313	22.7034	22.7113	23.0697	22.4054	22.7165	22.8517	22.5842	22.8	22.4756	22.9006	23.6618	22.2634	23.0116	22.8542	22.3823	22.9943	22.109	22.7058	22.7181	22.661	23.0924	22.4016	23.0071	22.9713	22.2252	22.7566	22.3114	22.2907	22.9492	IDUA	P35475	Alpha-L-iduronidase OS=Homo sapiens OX=9606 GN=IDUA PE=1 SV=2	4	41
24.9955	25.1615	25.3399	25.3703	24.658	25.1195	25.2676	25.0203	24.9318	25.842	25.0623	25.2862	25.0558	25.0454	25.3995	25.365	25.2831	25.1941	25.2227	25.2157	25.2612	25.3571	25.2274	25.3457	25.4023	25.6167	25.657	25.2801	25.1252	25.145	25.2671	25.2235	25.0762	25.1335	25.153	25.178	25.0985	25.2028	25.1278	25.1725	25.4643	25.3472	25.1586	25.7957	25.4709	MAN2A1	Q16706	Alpha-mannosidase 2 OS=Homo sapiens OX=9606 GN=MAN2A1 PE=1 SV=2	4	41
21.2096	21.4242	21.1541	20.3265	21.2549	21.5097	21.6347	21.5677	20.9315	20.2386	20.3475	21.5302	21.1764	21.6311	21.796	21.8418	22.0455	20.9185	22.1818	21.2024	20.7545	21.0047	21.3393	21.4073	21.4259	18.9985	20.3821	21.0513	22.1772	21.4312	21.0161	19.4867	20.1932	21.157	21.4938	21.3543	20.055	21.4845	21.4996	21.3659	21.7925	20.2143	21.2175	NaN	20.0426	MAN2C1	Q9NTJ4	Alpha-mannosidase 2C1 OS=Homo sapiens OX=9606 GN=MAN2C1 PE=1 SV=1	4	40
19.4506	16.4832	17.5266	17.5819	21.7152	19.6004	19.3086	20.0592	19.3715	20.6348	19.8473	21.1145	20.8349	20.6298	21.141	20.0369	20.419	19.695	19.5105	19.7961	19.5111	19.5991	17.5098	19.9462	20.1395	20.0853	20.1167	20.1943	19.8835	17.8574	19.7263	19.4037	19.9831	17.8318	19.4854	20.2688	20.1183	19.735	18.1552	21.0979	20.1236	20.1669	19.6249	20.5446	17.0428	AGPAT5	Q9NUQ2	1-acyl-sn-glycerol-3-phosphate acyltransferase epsilon OS=Homo sapiens OX=9606 GN=AGPAT5 PE=1 SV=3	4	41
16.2059	16.3759	16.6753	16.2325	15.4927	16.023	16.4571	16.7087	16.6579	16.1967	16.5539	16.5346	16.7168	16.0043	16.0047	16.8896	16.5033	16.0748	16.3671	16.6428	16.7257	16.3077	16.8556	16.1032	16.4804	15.9489	16.302	15.532	16.363	16.6244	15.7977	16.3275	16.2446	15.6652	16.3095	16.5589	16.5362	16.2321	16.7772	16.4189	17.2111	16.5791	15.7372	16.6722	16.3613	AMACR	Q9UHK6	Alpha-methylacyl-CoA racemase OS=Homo sapiens OX=9606 GN=AMACR PE=1 SV=2	4	41
23.9567	23.5869	23.9398	23.6508	23.5873	23.881	23.395	23.7016	23.672	24.2709	23.8055	23.7432	23.8426	23.7038	23.3429	24.0635	23.8851	23.6788	23.8375	23.3215	23.858	23.742	23.7147	23.5379	23.6627	24.2649	22.9289	23.6809	23.5461	23.6379	23.8793	23.8321	23.2065	23.7844	23.645	23.9743	23.5657	23.5106	23.5843	23.4365	23.7893	23.971	23.5788	23.8723	24.0727	NAGA	P17050	Alpha-N-acetylgalactosaminidase OS=Homo sapiens OX=9606 GN=NAGA PE=1 SV=2	4	41
24.8516	24.7621	24.9384	25.0422	24.9847	24.8445	24.9417	24.9766	25.1359	25.2811	24.9435	24.8404	24.8466	24.7319	24.7808	24.9615	25.0367	24.7934	24.7114	24.8026	24.767	24.7586	24.645	24.9996	24.7887	24.7604	24.5414	24.7547	24.5371	24.8596	25.042	24.8888	24.7482	24.7046	24.9223	24.9111	25.1083	24.9022	24.9857	24.9151	25.0908	25.1865	24.9238	24.7113	25.1443	NAGLU	P54802	Alpha-N-acetylglucosaminidase OS=Homo sapiens OX=9606 GN=NAGLU PE=1 SV=2	4	41
26.4234	26.4117	26.3628	26.301	26.2903	26.4017	26.5126	26.4157	26.446	25.7884	26.412	26.2592	26.3334	26.3008	26.1945	26.4055	26.4459	26.4441	26.4062	26.4408	26.553	26.5497	26.437	26.4304	26.5122	25.8829	26.4554	26.3987	26.3215	26.3779	26.5075	26.4576	26.3183	26.2796	26.376	26.2564	26.4912	26.4695	26.437	26.3825	26.2409	26.2819	26.4782	25.1514	26.4452	PARVA	Q9NVD7	Alpha-parvin OS=Homo sapiens OX=9606 GN=PARVA PE=1 SV=1	4	41
17.5624	18.2864	16.8751	17.737	17.4912	17.9839	NaN	17.5781	17.6911	NaN	17.5646	17.0009	16.868	17.8232	16.9494	NaN	17.0001	17.4065	17.407	17.5013	17.0086	17.6861	17.8897	17.7804	16.7996	NaN	NaN	16.9977	17.3882	17.2723	17.2255	17.2591	17.2043	16.9698	17.2026	NaN	17.2464	17.9392	17.4213	17.5013	NaN	NaN	17.0051	NaN	16.6603	ALPK2	Q86TB3	Alpha-protein kinase 2 OS=Homo sapiens OX=9606 GN=ALPK2 PE=1 SV=3	4	32
25.9784	25.8725	25.9333	25.8995	26.0036	25.9703	26.0233	25.9371	25.8843	25.9412	25.9454	26.0025	25.9609	26.0412	25.9939	25.9102	26.0228	25.9799	25.9441	26.0501	25.9694	26.0222	25.9599	25.8972	25.935	25.8459	26.3024	26.0971	25.9107	25.8964	25.9834	26.0492	26.0296	26.18	26.1284	25.9706	26.1013	26.0377	25.8434	26.0925	25.978	25.9877	26.0032	25.2278	26.0186	NAPA	P54920	Alpha-soluble NSF attachment protein OS=Homo sapiens OX=9606 GN=NAPA PE=1 SV=3	4	41
24.9969	25.1286	24.7996	25.0588	24.5728	24.8794	24.8369	24.8771	24.9547	24.4541	25.1787	24.9761	24.6795	24.877	25.0229	25.0128	25.1405	25.1849	25.0813	24.9944	24.9196	24.9609	24.9558	24.8287	24.8521	24.3517	25.2031	25.1487	25.2924	25.0739	24.9873	24.9691	25.0814	24.9068	25.0027	24.8417	25.1661	24.7837	24.9037	25.0209	24.5744	24.8196	25.1449	23.613	25.0812	TXLNA	P40222	Alpha-taxilin OS=Homo sapiens OX=9606 GN=TXLNA PE=1 SV=3	4	41
19.4833	19.4698	19.6272	18.3433	19.3367	19.6833	19.5691	19.4599	19.4328	19.5174	19.5221	19.5712	19.7767	19.6132	19.5691	19.9318	19.4919	19.4437	19.6005	19.3152	19.586	19.1318	19.6471	19.895	19.5199	19.5712	18.7103	18.2948	19.6618	19.9954	19.407	19.3458	19.4736	19.5001	19.6043	19.3046	19.4559	18.818	19.6359	19.5292	19.8656	19.7435	19.0395	18.7953	19.4824	TTPAL	Q9BTX7	Alpha-tocopherol transfer protein-like OS=Homo sapiens OX=9606 GN=TTPAL PE=1 SV=2	4	41
18.0182	18.3657	18.9736	17.712	18.864	18.7023	17.669	17.641	19.0498	18.7522	17.8683	18.1505	19.1178	17.5418	19.2549	18.5636	18.3555	17.9343	18.2347	18.3926	18.1247	18.6427	17.8475	18.1146	19.0008	18.2996	18.3591	NaN	18.417	18.0494	NaN	17.9075	17.6803	17.5733	17.9784	18.1168	17.6068	17.5593	17.9578	18.1962	18.0518	17.9306	17.878	17.0109	18.113	ATAT1	Q5SQI0	Alpha-tubulin N-acetyltransferase 1 OS=Homo sapiens OX=9606 GN=ATAT1 PE=1 SV=1	4	39
17.894	17.2275	17.5307	17.1554	19.8658	17.2322	17.3781	17.8933	17.3297	17.5924	17.8478	17.9839	17.6308	17.6474	18.0902	17.6367	18.2985	17.8062	19.7587	17.8002	17.7852	18.4376	18.3921	17.8391	18.1545	19.3774	17.6433	17.4135	17.1281	17.7076	17.2446	16.4505	16.7188	17.6045	18.2918	16.7257	19.5629	16.0479	NaN	19.6919	17.4512	19.1767	16.5964	16.1689	17.4895	ALS2	Q96Q42	Alsin OS=Homo sapiens OX=9606 GN=ALS2 PE=1 SV=2	4	40
21.2542	20.9082	21.4353	21.0069	22.202	20.4372	21.1604	21.9344	21.659	20.7041	21.2013	21.9278	21.543	21.4889	21.6879	21.5791	21.7734	21.3633	21.5396	21.3488	21.2233	21.5735	20.9764	21.3104	21.5759	20.7242	21.166	21.3173	21.9573	21.1675	20.9477	21.1376	21.21	21.8181	21.28	21.6011	21.2337	21.1125	21.0655	21.7752	20.7427	21.2168	21.402	20.4705	21.1827	PPAT	Q06203	Amidophosphoribosyltransferase OS=Homo sapiens OX=9606 GN=PPAT PE=1 SV=1	4	41
NaN	NaN	NaN	NaN	NaN	NaN	NaN	NaN	NaN	NaN	NaN	NaN	NaN	NaN	NaN	NaN	NaN	NaN	17.7048	NaN	NaN	NaN	17.3619	NaN	NaN	NaN	NaN	NaN	NaN	NaN	NaN	18.5664	18.0058	NaN	NaN	NaN	NaN	NaN	NaN	NaN	NaN	NaN	NaN	NaN	NaN	AOC1	P19801	Amiloride-sensitive amine oxidase [copper-containing] OS=Homo sapiens OX=9606 GN=AOC1 PE=1 SV=4	0	4
27.0862	26.7849	26.9058	27.0395	26.5206	26.5414	26.2264	26.0682	26.3993	26.1421	25.8784	26.3028	26.3513	26.8443	25.5676	26.1848	25.8479	26.6723	26.3972	26.3832	26.6633	26.258	26.3479	26.7496	26.7449	26.6085	26.1134	26.2454	26.5353	25.7397	26.363	26.3598	26.3386	26.1381	26.4771	26.5345	26.9149	26.2647	26.4255	26.6607	26.6573	26.6594	26.6052	27.0162	26.6619	CCDC80	Q76M96	Coiled-coil domain-containing protein 80 OS=Homo sapiens OX=9606 GN=CCDC80 PE=1 SV=1	4	41
NaN	NaN	NaN	14.9449	NaN	NaN	NaN	17.1256	NaN	18.7993	16.4796	17.924	19.3548	NaN	17.5924	NaN	15.7195	15.9856	NaN	NaN	NaN	15.3679	NaN	15.2811	17.6174	21.1457	16.8754	NaN	NaN	16.71	NaN	15.6768	18.6174	NaN	NaN	18.0039	16.2703	NaN	NaN	17.9596	NaN	NaN	16.3167	15.8282	NaN	MAOB	P27338	Amine oxidase [flavin-containing] B OS=Homo sapiens OX=9606 GN=MAOB PE=1 SV=3	1	21
25.8415	26.0349	25.8125	25.6764	25.9366	25.9121	25.9455	26.0631	25.9767	25.5166	25.8752	25.9195	25.8828	25.9289	25.7946	25.9479	25.855	25.9639	25.8504	25.8451	25.9786	25.9606	26.0274	26.0521	26.0399	25.6602	25.9774	25.8582	25.9314	25.7156	25.8658	25.8761	25.8497	25.8797	25.9572	25.9129	25.9058	25.8858	25.7867	25.9054	25.8541	25.6536	25.7826	24.6269	25.7134	AIMP1	Q12904	Aminoacyl tRNA synthase complex-interacting multifunctional protein 1 OS=Homo sapiens OX=9606 GN=AIMP1 PE=1 SV=2	4	41
25.092	25.607	25.5937	25.7392	25.5174	25.4197	25.6239	25.2709	25.5395	25.3609	25.5119	25.6189	25.2811	25.583	25.5732	25.3827	25.475	25.5607	25.3315	25.5053	25.6232	25.5983	25.6692	25.3759	25.6434	25.1588	25.5583	25.2136	25.6082	25.5578	25.5454	25.4225	25.3854	25.7336	25.4206	25.2266	25.3483	25.5826	25.6457	25.4588	25.763	25.6031	25.5569	24.6316	25.081	AIMP2	Q13155	Aminoacyl tRNA synthase complex-interacting multifunctional protein 2 OS=Homo sapiens OX=9606 GN=AIMP2 PE=1 SV=2	4	41
24.9782	24.7489	24.8947	24.3596	24.8453	24.5457	24.4889	24.5163	24.4922	24.0249	24.2857	24.3302	24.6318	25.0019	24.8551	24.934	25.0836	24.9902	24.7676	24.9177	24.6762	24.8029	24.4216	24.9498	25.008	24.3834	24.3611	24.2852	24.6856	24.4814	24.2597	24.3964	24.6801	24.425	24.7405	24.4256	24.6413	24.5687	24.2179	24.6531	24.3534	24.138	24.219	23.202	24.3293	ACY1	Q03154	Aminoacylase-1 OS=Homo sapiens OX=9606 GN=ACY1 PE=1 SV=1	4	41
26.7915	27.0005	27.0065	26.7697	26.8909	26.923	26.8753	27.0546	26.9166	26.6577	26.9647	27.079	26.9758	26.695	27.163	26.9845	26.9227	26.9122	26.8508	26.9533	27.0015	27.0354	27.0109	27.0231	27.0388	26.7812	26.864	26.7976	26.9575	27.0903	27.0446	27.0121	26.8495	26.9881	26.9354	26.8291	26.8245	26.7052	26.8539	26.7384	26.9353	26.8912	26.9103	25.7863	26.8636	RNPEP	Q9H4A4	Aminopeptidase B OS=Homo sapiens OX=9606 GN=RNPEP PE=1 SV=2	4	41
31.8285	31.8113	31.8172	31.7031	31.4102	31.8174	31.9052	31.5256	31.6237	31.5406	31.8077	31.735	31.577	31.7143	31.6257	31.9781	31.8015	31.6808	31.748	31.7728	31.9506	31.7352	31.7548	31.8781	31.795	31.9688	31.9658	31.6588	31.5949	31.6551	31.8227	31.6853	31.531	31.6199	31.708	31.7568	31.7117	31.5945	31.7048	31.5857	31.8498	31.749	31.5862	31.0451	31.7824	ANPEP	P15144	Aminopeptidase N OS=Homo sapiens OX=9606 GN=ANPEP PE=1 SV=4	4	41
17.5928	17.5694	17.5824	17.1308	17.7022	17.2465	17.1284	17.4431	17.5266	17.2311	17.5634	17.3876	17.4388	17.1633	17.6418	17.3973	17.1992	17.5017	17.4002	17.6165	17.6052	17.5507	17.2918	17.6074	17.7491	16.8795	17.3621	17.1288	17.4413	17.225	17.3528	17.4279	17.4648	17.6466	17.5883	17.3697	17.5123	17.0036	17.3511	17.3934	17.3717	17.1837	17.2063	NaN	17.6349	AMMECR1	Q9Y4X0	AMME syndrome candidate gene 1 protein OS=Homo sapiens OX=9606 GN=AMMECR1 PE=1 SV=1	4	40
NaN	NaN	NaN	NaN	NaN	NaN	16.1642	NaN	19.7107	NaN	NaN	15.8684	19.3158	NaN	NaN	23.5164	22.7807	15.043	18.2498	20.5345	23.4478	14.9095	NaN	18.1868	18.5403	23.297	15.744	14.6833	NaN	16.3895	15.5436	15.7116	23.3565	15.2593	14.9409	22.8724	15.2562	14.5936	15.9362	19.3912	NaN	NaN	15.1236	20.8791	NaN	RHAG	Q02094	Ammonium transporter Rh type A OS=Homo sapiens OX=9606 GN=RHAG PE=1 SV=2	0	29
25.3633	25.4193	25.3728	25.3676	25.3301	25.2753	25.4231	25.29	25.2722	25.1353	25.4274	25.3419	25.2748	25.3398	25.3116	25.4191	25.3574	25.318	25.425	25.2857	25.528	25.463	25.4198	25.3472	25.3221	25.4032	25.6767	25.4524	25.5896	25.252	25.4436	25.3419	25.275	25.4564	25.4375	25.6961	25.3598	25.4394	25.4272	25.438	25.5185	25.5057	25.3892	24.6027	25.3427	AMPD2	Q01433	AMP deaminase 2 OS=Homo sapiens OX=9606 GN=AMPD2 PE=1 SV=2	4	41
NaN	NaN	NaN	15.1478	17.8759	19.0433	17.4861	14.669	NaN	18.713	17.2381	14.8526	14.7991	14.6009	16.4121	15.261	16.2388	15.9212	NaN	14.7526	15.6772	16.2835	15.7165	15.6113	NaN	20.0095	22.9519	18.8554	14.0116	13.9691	18.4335	14.858	19.237	15.248	15.7598	14.7181	15.3215	18.3027	17.9719	14.8617	19.1922	17.8558	18.7721	17.951	19.4354	AMPD3	Q01432	AMP deaminase 3 OS=Homo sapiens OX=9606 GN=AMPD3 PE=1 SV=1	1	38
21.6599	21.8926	21.593	21.8474	21.6369	21.3877	21.6262	21.4799	21.4474	15.6974	20.71	21.5105	21.5605	21.6546	21.3529	20.3857	21.2431	21.9142	21.4248	21.5394	21.4774	21.8347	21.1823	21.6403	21.2404	NaN	21.4919	21.5949	21.7377	20.8693	21.1919	21.2099	21.5826	21.5356	21.2761	19.7545	21.3588	21.8688	21.5213	21.6345	20.3872	20.2121	21.4747	14.6938	21.0668	AMIGO2	Q86SJ2	Amphoterin-induced protein 2 OS=Homo sapiens OX=9606 GN=AMIGO2 PE=1 SV=1	4	40
16.3058	NaN	16.2885	15.529	NaN	NaN	NaN	17.2317	NaN	14.9694	NaN	NaN	16.5486	NaN	16.839	17.1018	17.1611	15.9016	16.2356	NaN	16.4291	16.4374	17.2718	16.322	16.3081	NaN	17.1536	16.311	16.7209	17.0767	17.2529	17.1803	17.4405	16.5026	16.2621	15.8107	15.8391	16.9645	16.9343	16.3521	15.8263	16.2523	17.0812	15.5148	16.5295	STAMBPL1	Q96FJ0	AMSH-like protease OS=Homo sapiens OX=9606 GN=STAMBPL1 PE=1 SV=2	3	32
24.462	24.6527	24.44	24.2741	24.534	24.3912	24.3865	24.2567	24.2648	24.5026	24.4932	24.7439	24.4824	24.5134	24.9457	24.5721	24.6118	24.7285	24.6708	24.4712	24.5445	24.7325	24.4559	24.4236	24.1234	24.2746	24.7349	24.5534	24.3598	24.1852	24.424	24.8392	24.5074	24.8936	24.742	24.6062	24.743	24.6665	24.8416	24.8298	24.8972	24.8036	24.7934	24.2134	24.8102	APBB1IP	Q7Z5R6	Amyloid beta A4 precursor protein-binding family B member 1-interacting protein OS=Homo sapiens OX=9606 GN=APBB1IP PE=1 SV=1	4	41
16.1835	NaN	17.9903	17.0246	16.9483	NaN	16.4674	16.6573	NaN	17.4991	17.1446	17.853	18.3345	NaN	17.7124	17.8532	17.9529	16.5378	17.5851	17.7574	16.4697	15.914	17.986	16.8937	17.8699	17.7321	NaN	16.9346	NaN	17.945	16.8995	17.5244	16.4684	17.1162	16.6073	17.9653	17.9026	17.9209	17.4484	18.064	17.9185	18.0648	17.496	15.5625	16.2563	APPBP2	Q92624	Amyloid protein-binding protein 2 OS=Homo sapiens OX=9606 GN=APPBP2 PE=1 SV=2	3	36
20.839	20.8856	21.3525	20.7115	20.8247	21.0385	20.7223	21.0579	21.1839	19.7078	20.5974	21.1456	21.0511	20.4496	20.441	20.8499	20.1766	21.273	21.1175	20.1625	21.1407	21.347	20.6892	20.9763	21.1377	18.4351	19.8409	20.3849	20.5663	20.5408	20.7821	20.9006	19.4223	20.7698	20.7506	20.5148	20.648	20.3495	21.2034	19.775	20.5337	19.5979	20.645	15.3109	20.8789	APBB2	Q92870	Amyloid-beta A4 precursor protein-binding family B member 2 OS=Homo sapiens OX=9606 GN=APBB2 PE=1 SV=3	4	41
26.711	26.6255	26.4101	26.6243	26.4113	26.4775	26.7661	26.9411	27.2382	25.8863	27.1897	26.9568	26.9393	26.9321	26.3489	25.1535	26.5023	26.3891	27.0854	26.3294	25.3267	26.3826	26.5072	26.488	26.289	24.5396	25.5169	26.5049	26.2247	25.7617	25.9743	26.8073	26.1829	26.6989	26.7951	25.4593	26.7322	27.004	27.2616	26.5411	25.5687	25.4571	26.9999	26.1523	26.8789	APP	P05067	Amyloid-beta precursor protein OS=Homo sapiens OX=9606 GN=APP PE=1 SV=3	4	41
15.0996	17.0219	18.64	15.7965	19.6475	18.6394	20.1083	19.0901	18.2725	18.1153	19.6801	20.0147	19.1665	18.4615	19.4504	17.2262	19.4202	18.6218	18.8968	17.7206	17.9005	18.1331	17.9044	19.359	18.6188	19.5902	20.0414	18.7846	18.7386	18.5112	18.9017	18.7736	17.8813	20.8742	19.246	18.8336	19.3705	17.5924	17.9471	18.9335	18.4405	17.8585	18.9325	16.6004	20.0363	DDX60	Q8IY21	Probable ATP-dependent RNA helicase DDX60 OS=Homo sapiens OX=9606 GN=DDX60 PE=1 SV=3	4	41
21.0664	21.3323	21.0847	20.7381	20.868	20.6306	20.9465	20.7333	20.9247	20.4206	21.2077	20.9192	20.8182	20.6932	20.9593	21.0767	21.0962	20.9969	21.0443	20.769	21.1628	21.0857	21.2594	20.7878	20.7955	20.5108	21.1279	20.7499	20.8631	20.8969	20.6024	20.9771	20.7488	20.8761	20.8082	20.914	21.1672	20.7857	20.9314	21.4142	20.8199	20.5859	20.8094	16.4064	21.083	ZFAND1	Q8TCF1	AN1-type zinc finger protein 1 OS=Homo sapiens OX=9606 GN=ZFAND1 PE=1 SV=1	4	41
19.9473	20.6138	20.376	19.6627	20.4732	20.2646	20.3444	19.8273	20.0718	19.3037	20.5772	20.1589	19.7309	20.1926	19.9387	19.8175	19.9277	19.8081	20.5356	20.6972	20.5803	20.0763	20.6672	19.7524	19.9359	19.5862	19.1669	19.3702	19.1228	20.4896	19.4855	19.4634	19.3915	20.2882	20.3637	19.6469	19.6781	19.7387	20.5982	20.2784	18.5705	19.5193	20.2798	18.4021	19.6006	ZFAND2B	Q8WV99	AN1-type zinc finger protein 2B OS=Homo sapiens OX=9606 GN=ZFAND2B PE=1 SV=1	4	41
24.3333	24.3867	24.4908	23.8918	24.4131	24.5213	24.4793	24.3015	24.5229	23.8088	24.4088	24.2467	24.3372	24.3791	24.3121	24.329	24.4318	24.6154	24.388	24.3526	24.4345	24.3091	24.4521	24.4606	24.2955	23.8089	24.4148	24.3993	24.2219	24.3468	24.2872	24.3123	23.8628	24.2498	24.3785	24.0491	24.4237	24.2516	24.2106	24.189	24.1771	23.826	24.2648	22.4532	24.2445	CIAPIN1	Q6FI81	Anamorsin OS=Homo sapiens OX=9606 GN=CIAPIN1 PE=1 SV=2	4	41
20.5364	21.2516	21.4685	20.3605	20.9655	20.7617	21.0774	21.1399	20.5569	20.7773	21.1551	21.8144	20.7334	21.197	21.4934	21.6274	21.0187	21.0375	20.7505	21.2889	21.4679	21.2813	20.9901	21.0534	21.4111	20.9197	21.3587	20.804	20.7736	20.8988	21.1388	21.0472	20.8695	21.2481	20.4451	21.0892	20.6293	20.9878	20.6957	21.3244	21.3302	20.9254	20.7316	19.6568	20.0535	ANAPC1	Q9H1A4	Anaphase-promoting complex subunit 1 OS=Homo sapiens OX=9606 GN=ANAPC1 PE=1 SV=1	4	41
NaN	NaN	NaN	NaN	NaN	NaN	NaN	18.6488	NaN	NaN	19.4623	18.8409	NaN	NaN	NaN	18.952	NaN	19.3133	18.4872	NaN	NaN	18.7499	19.456	18.8435	NaN	18.8116	19.4342	NaN	19.0536	18.6498	NaN	NaN	NaN	NaN	NaN	NaN	NaN	NaN	NaN	NaN	18.63	NaN	NaN	NaN	18.9953	ANAPC10	Q9UM13	Anaphase-promoting complex subunit 10 OS=Homo sapiens OX=9606 GN=ANAPC10 PE=1 SV=1	0	15
22.8784	22.8313	22.8625	22.6579	22.5463	22.3557	22.8364	22.7787	22.8355	23.2115	22.8553	22.847	22.7081	22.6024	23.1687	22.7955	22.8603	22.7455	22.7768	22.6605	22.7696	22.7848	22.7622	22.8818	22.9089	23.126	22.5914	22.654	22.3074	22.4602	22.5735	22.5563	22.4375	22.5876	22.3369	23.0037	22.4587	22.7438	22.4171	22.606	22.5234	23.0023	22.4026	22.5223	22.7537	ANAPC2	Q9UJX6	Anaphase-promoting complex subunit 2 OS=Homo sapiens OX=9606 GN=ANAPC2 PE=1 SV=1	4	41
20.3643	20.0939	20.4126	20.0988	20.2019	20.0698	20.1195	20.3914	20.0087	19.9715	19.9464	20.7252	20.2419	20.0231	20.2399	20.2457	19.8987	19.873	20.2044	20.2846	20.258	20.3645	20.335	20.2172	20.4033	20.2687	19.9231	19.8778	20.1696	20.2256	19.9659	20.1849	19.9642	20.2085	20.2759	20.0612	20.1966	20.1893	20.2383	20.3286	20.4952	20.3359	20.1511	19.808	19.8963	ANAPC4	Q9UJX5	Anaphase-promoting complex subunit 4 OS=Homo sapiens OX=9606 GN=ANAPC4 PE=1 SV=2	4	41
20.0679	20.0013	19.7264	19.6875	20.1307	19.3314	19.2486	19.3212	19.4136	20.2977	19.9538	20.3556	19.4198	19.437	20.1782	19.9825	19.9641	20.1072	19.322	20.4449	20.1175	20.0281	19.5548	20.5442	19.4549	19.9131	20.1568	19.7201	19.7653	20.0178	19.7315	19.7781	19.6899	19.4601	19.4267	19.8312	19.8875	19.2777	19.716	19.7025	19.7632	19.796	19.7757	19.1768	19.7809	ANAPC5	Q9UJX4	Anaphase-promoting complex subunit 5 OS=Homo sapiens OX=9606 GN=ANAPC5 PE=1 SV=2	4	41
19.486	19.766	NaN	19.9623	19.8359	19.6371	20.261	19.727	18.7807	18.8411	19.1926	20.7031	19.0313	19.5798	19.9194	18.1064	20.3905	19.7908	17.9709	20.1116	20.2668	20.2319	19.359	19.8662	20.7347	19.9354	20.8933	20.5034	18.034	20.7176	20.506	17.5398	20.6119	20.3659	20.0615	20.3881	19.1133	19.1944	19.197	NaN	20.3191	20.1251	19.9906	NaN	19.5906	ANAPC7	Q9UJX3	Anaphase-promoting complex subunit 7 OS=Homo sapiens OX=9606 GN=ANAPC7 PE=1 SV=4	3	39
20.2712	20.3001	20.0191	20.385	20.2395	20.1632	20.6774	20.6311	20.5097	19.8683	20.7221	20.4537	19.9359	20.2509	20.671	20.4208	20.5036	20.4638	20.1816	20.2242	20.6161	20.159	19.9739	20.6574	20.7363	20.3678	20.8711	20.214	20.3072	20.6056	20.5674	19.8782	19.615	19.7876	20.1173	20.0514	20.1248	19.8929	19.9063	NaN	19.779	19.6609	NaN	NaN	20.4879	CDC26	Q8NHZ8	Anaphase-promoting complex subunit CDC26 OS=Homo sapiens OX=9606 GN=CDC26 PE=1 SV=1	4	38
21.2763	21.1604	21.447	21.2485	21.3438	21.4114	21.4305	21.357	20.674	21.1485	21.4384	21.4876	21.4607	21.2221	21.4535	21.2118	21.4507	21.4608	21.3086	21.1197	21.4755	21.4544	21.3127	21.5166	21.1673	21.5092	21.5608	21.5317	21.5065	21.4155	21.5233	20.8754	21.2997	21.2011	21.326	21.2156	21.217	21.2458	20.4395	20.9056	21.1175	20.8967	21.2254	20.4906	21.2734	AAMP	Q13685	Angio-associated migratory cell protein OS=Homo sapiens OX=9606 GN=AAMP PE=1 SV=2	4	41
20.0962	20.0456	20.0965	19.8998	20.2396	20.1254	20.2065	20.3959	20.3543	19.8818	20.2038	19.9262	20.1382	20.3343	20.006	20.4845	20.1963	20.1492	20.0918	19.9894	20.21	19.9996	20.2413	19.9822	19.789	20.0395	19.6754	19.8688	20.044	20.0487	19.9587	20.3211	20.0123	20.1148	20.0534	20.2584	19.9813	20.1291	20.0945	20.3392	20.17	20.3705	20.1201	19.4143	20.0506	AMOTL1	Q8IY63	Angiomotin-like protein 1 OS=Homo sapiens OX=9606 GN=AMOTL1 PE=1 SV=1	4	41
20.043	19.6247	19.6192	18.5963	19.314	19.7429	20.5243	19.3839	20.1608	18.2978	20.6002	20.0175	20.2164	19.5713	19.4532	19.6799	19.6379	19.2115	19.9563	18.9318	19.3591	19.941	19.359	19.8807	19.9597	20.2053	20.2023	20.3495	20.4095	19.5193	19.7696	20.5641	19.4251	19.8975	19.5737	19.8137	18.3522	18.349	19.2998	19.5118	19.3944	19.61	18.5048	19.5742	20.7864	ANGPTL2	Q9UKU9	Angiopoietin-related protein 2 OS=Homo sapiens OX=9606 GN=ANGPTL2 PE=1 SV=1	4	41
27.7547	27.5282	27.704	27.7188	27.0752	27.5036	27.8001	26.7963	26.9342	26.1097	26.9845	27.0692	26.9571	27.3058	26.9014	26.4473	27.3558	27.7241	27.2226	27.2635	26.957	27.3216	27.265	27.3115	27.2692	25.7368	27.8819	27.4302	27.4392	27.0617	27.2296	27.314	27.6436	27.7438	27.2691	26.8455	27.794	27.5234	27.523	26.9874	26.554	26.9702	27.1978	25.5004	27.3829	CCN1 (CYR61)	O00622	CCN family member 1 OS=Homo sapiens OX=9606 GN=CCN1 PE=1 SV=1	4	41
27.3012	27.2983	27.2215	27.1267	27.1254	27.3986	27.2307	27.2792	27.3025	26.7843	27.263	27.0692	27.033	27.1539	27.1669	27.165	27.2386	27.2749	27.2074	27.2258	27.381	27.3748	27.3117	27.3725	27.2142	27.0603	27.114	27.0624	27.1584	27.1659	27.29	27.2052	27.0331	27.1142	27.1781	26.9553	27.1434	27.1836	27.0685	27.1814	26.998	27.0063	27.0604	25.6705	27.1661	RAI14	Q9P0K7	Ankycorbin OS=Homo sapiens OX=9606 GN=RAI14 PE=1 SV=2	4	41
17.0927	17.1544	NaN	NaN	18.2216	17.4645	17.9268	17.1082	NaN	18.533	17.4268	17.5973	17.7953	16.4121	17.6876	18.1852	18.4819	18.424	17.7257	16.6836	16.6013	16.7656	17.9375	17.1453	NaN	18.8731	18.5545	17.9734	17.1211	16.788	17.1141	17.9845	17.4551	18.0766	NaN	18.4305	NaN	NaN	17.5062	17.5579	18.7807	NaN	18.2807	17.7529	NaN	ABTB1	Q969K4	Ankyrin repeat and BTB/POZ domain-containing protein 1 OS=Homo sapiens OX=9606 GN=ABTB1 PE=1 SV=1	2	34
15.799	17.4275	17.2689	16.2754	NaN	NaN	16.3942	16.5768	15.3889	17.0787	15.4106	16.0173	16.8289	16.7929	17.0343	17.7175	17.1255	16.8043	16.4163	16.6372	16.7077	16.5227	NaN	16.162	15.7577	15.5628	16.216	15.8547	NaN	17.3501	16.6232	16.9613	16.7848	16.9899	17.4142	17.1364	16.8057	16.3329	18.0932	16.8149	18.4898	17.6584	16.8192	NaN	16.4954	BTBD11	A6QL63	Ankyrin repeat and BTB/POZ domain-containing protein BTBD11 OS=Homo sapiens OX=9606 GN=BTBD11 PE=2 SV=3	4	36
20.1982	20.5313	20.3623	20.149	20.5151	20.2464	20.2143	20.3702	20.459	20.2349	20.4713	20.7887	19.8877	20.1567	20.1705	20.5836	20.7877	20.3679	20.3468	19.3444	20.8185	20.5006	20.6811	20.3563	20.3892	20.0184	20.1843	20.0932	19.9953	20.3916	20.2626	20.4726	20.7223	20.3032	20.6034	20.5695	20.5031	20.357	20.4749	20.6067	20.5427	20.501	20.6522	19.287	20.4361	ANKHD1	Q8IWZ3	Ankyrin repeat and KH domain-containing protein 1 OS=Homo sapiens OX=9606 GN=ANKHD1 PE=1 SV=1	4	41
22.705	22.9558	22.8271	22.8899	22.7388	22.9692	23.3466	22.6991	22.6039	21.9965	23.2198	22.8207	22.5501	22.6663	22.6918	22.4654	22.7027	22.9478	22.7245	23.083	22.8691	22.7988	22.9434	22.9142	22.6705	22.0935	23.3879	22.7198	22.9554	22.8752	23.2751	22.857	23.0511	23.0111	22.9007	22.3941	23.0994	22.9938	23.038	22.8065	22.6254	22.403	23.286	19.2771	23.2505	ANKLE2	Q86XL3	Ankyrin repeat and LEM domain-containing protein 2 OS=Homo sapiens OX=9606 GN=ANKLE2 PE=1 SV=4	4	41
20.1228	19.9862	20.0068	19.829	20.0069	19.6489	19.5173	20.2197	20.2884	19.2834	20.0357	20.4895	19.906	19.6169	19.8787	19.8692	19.9724	19.9559	20.0863	19.7141	19.8943	20.979	20.2999	20.9586	20.1911	19.1178	19.1567	20.8154	21.6099	19.7565	19.8844	19.982	19.8619	19.8395	19.9805	19.971	21.7029	22.5618	19.8288	20.275	19.8515	20.1699	20.0478	19.0533	19.4991	ANKMY2	Q8IV38	Ankyrin repeat and MYND domain-containing protein 2 OS=Homo sapiens OX=9606 GN=ANKMY2 PE=1 SV=1	4	41
19.4137	18.9763	19.6806	18.9669	19.2554	18.8999	19.0429	19.1748	19.1591	18.9292	19.6062	19.573	19.1808	19.246	19.212	19.3644	19.1637	19.2721	19.4198	19.2004	19.6338	19.5101	19.6789	19.4267	19.4081	18.9905	19.2933	19.1507	19.0752	19.4001	19.2442	19.3947	19.0209	19.5332	19.5733	19.224	19.4264	19.1325	19.2794	19.3017	19.2073	19.402	19.353	18.1819	19.2548	ANKS1A	Q92625	Ankyrin repeat and SAM domain-containing protein 1A OS=Homo sapiens OX=9606 GN=ANKS1A PE=1 SV=4	4	41
NaN	NaN	16.1854	16.4702	16.505	16.0318	18.2343	16.5389	16.5612	NaN	NaN	16.3796	NaN	15.9834	NaN	NaN	16.4921	19.0114	NaN	16.7246	16.9771	NaN	16.0278	16.3763	16.5072	15.2055	18.0608	16.0139	16.0944	15.5425	17.9842	16.6736	16.2792	16.4108	15.8172	NaN	16.1435	15.7838	15.6648	15.5794	16.0167	15.7782	16.3604	NaN	14.1699	ASB1	Q9Y576	Ankyrin repeat and SOCS box protein 1 OS=Homo sapiens OX=9606 GN=ASB1 PE=1 SV=1	2	32
17.2444	17.8177	17.2252	17.1806	17.6637	NaN	17.1409	17.2314	17.4346	17.3106	17.6658	17.7225	17.169	17.21	17.3875	16.7048	17.1995	17.5094	16.9081	17.4409	17.3068	17.0366	16.8507	17.1769	17.6394	17.427	17.1483	17.1735	17.5484	16.657	17.0971	17.229	17.4926	17.0131	17.538	NaN	17.6453	17.3082	17.6459	17.8676	17.4005	NaN	17.2567	17.1243	17.0533	ASB3	Q9Y575	Ankyrin repeat and SOCS box protein 3 OS=Homo sapiens OX=9606 GN=ASB3 PE=1 SV=1	4	38
19.4103	19.3157	19.385	19.3874	19.8482	18.5088	18.7576	19.7284	19.6847	18.1935	18.0866	19.4741	19.6555	19.6027	19.9078	18.7617	19.5463	19.3846	19.5505	19.4624	19.2599	19.8309	18.8665	19.6529	19.659	19.619	19.867	18.6684	18.5144	18.7149	19.3384	19.087	18.7509	19.2325	19.3329	19.4404	18.8019	19.4887	18.7668	19.5796	19.9049	19.5673	18.8899	NaN	18.6068	ASB6	Q9NWX5	Ankyrin repeat and SOCS box protein 6 OS=Homo sapiens OX=9606 GN=ASB6 PE=1 SV=1	4	40
NaN	16.2476	15.7525	NaN	15.7335	15.6987	16.1997	16.3682	NaN	NaN	16.796	16.9942	16.5106	NaN	16.3798	16.1743	16.4044	15.107	16.16	16.2854	15.6277	15.6467	15.2145	16.8307	16.0647	15.527	16.0577	14.7112	NaN	16.8523	15.6142	15.7782	15.7662	NaN	16.444	16.4052	16.9391	15.7784	16.1729	NaN	15.9778	NaN	NaN	NaN	16.9578	ASB9	Q96DX5	Ankyrin repeat and SOCS box protein 9 OS=Homo sapiens OX=9606 GN=ASB9 PE=1 SV=1	2	32
23.8822	23.9338	23.6526	23.6362	23.4882	24.0091	24.049	24.0473	24.0734	22.9186	24.4977	23.9575	23.113	23.6528	22.9489	24.1087	23.7648	23.5735	24.0788	23.7299	23.3671	24.0976	23.9042	24.0614	23.9346	23.3039	24.3218	23.6043	23.9515	23.4982	23.9797	23.8417	23.0905	23.8283	24.1462	23.3361	24.4174	23.9464	23.6279	23.9186	23.9219	23.7908	24.0809	19.3283	24.5831	ANKRD13A	Q8IZ07	Ankyrin repeat domain-containing protein 13A OS=Homo sapiens OX=9606 GN=ANKRD13A PE=1 SV=3	4	41
17.6783	17.6059	17.4106	16.5602	16.9742	16.7163	16.7925	17.1961	17.5144	17.4019	17.2223	17.5877	17.6653	16.9796	17.4579	17.424	17.5969	17.208	17.4913	17.9933	17.6543	17.5366	17.181	17.3145	17.2821	16.8831	16.6313	16.7848	16.8853	17.7924	16.9509	16.813	16.6373	16.3869	16.9984	17.278	16.7007	16.9388	17.8414	16.7544	17.856	16.8054	16.8105	15.9953	16.893	ANKRD16	Q6P6B7	Ankyrin repeat domain-containing protein 16 OS=Homo sapiens OX=9606 GN=ANKRD16 PE=1 SV=1	4	41
24.2123	24.2759	24.5435	24.3397	23.9349	24.152	24.1609	24.1013	24.0511	24.6141	24.3405	24.5157	23.9645	24.1869	24.3194	24.4046	24.2488	24.24	24.1718	24.1825	24.2731	24.3434	24.4953	24.3944	24.3086	24.5589	24.0904	24.0691	24.1623	24.1006	24.0982	24.1058	23.8657	24.1841	24.0949	24.2788	23.9795	24.1621	24.0062	23.9921	24.1896	24.5309	24.0923	24.263	24.0523	ANKRD17	O75179	Ankyrin repeat domain-containing protein 17 OS=Homo sapiens OX=9606 GN=ANKRD17 PE=1 SV=3	4	41
18.4988	NaN	NaN	NaN	NaN	17.7864	NaN	18.5973	18.3848	21.8793	18.1879	18.8265	17.6508	17.8859	15.5856	16.2338	NaN	NaN	18.0817	18.1734	NaN	18.6399	18.8507	NaN	18.9412	21.1172	16.5586	NaN	NaN	NaN	17.9564	16.8863	21.2766	NaN	18.1218	17.0257	18.7478	NaN	17.956	NaN	18.7145	16.9278	20.2368	22.978	19.1068	ANKRD22	Q5VYY1	Ankyrin repeat domain-containing protein 22 OS=Homo sapiens OX=9606 GN=ANKRD22 PE=2 SV=1	1	29
20.1361	20.5588	21.0595	20.4959	20.6717	21.2845	20.6192	20.6433	20.8885	20.9173	21.1954	20.8916	21.0389	20.1042	20.7549	20.8965	20.5929	20.5784	20.2957	20.7003	20.9942	20.6526	NaN	17.216	20.0554	19.8558	19.9378	20.1443	20.3098	21.3499	20.8655	20.86	21.0887	20.6064	20.8755	21.1583	20.7599	20.6932	21.5037	21.0559	21.5087	20.9156	20.6802	20.4773	20.8497	ANKRD27	Q96NW4	Ankyrin repeat domain-containing protein 27 OS=Homo sapiens OX=9606 GN=ANKRD27 PE=1 SV=2	4	40
24.4	24.5495	24.1637	24.8357	24.7703	24.4417	24.3577	24.2974	24.4672	26.1007	24.697	24.8267	24.7678	24.5224	25.1169	24.7554	24.6381	24.3873	24.7057	24.7953	24.311	24.5737	24.2046	24.4864	24.1995	25.0882	24.3918	25.0084	24.5121	24.8012	24.9915	24.4575	25.0344	24.4288	24.2748	25.0472	24.6107	24.6584	24.3914	24.5997	24.5445	24.8891	24.3885	25.5358	24.3011	ANKRD35	Q8N283	Ankyrin repeat domain-containing protein 35 OS=Homo sapiens OX=9606 GN=ANKRD35 PE=2 SV=2	4	41
14.8462	17.2594	16.1609	16.2896	20.2466	15.4088	16.6735	19.5437	18.2409	20.5684	18.1095	20.6691	18.6569	19.7749	21.1637	15.5264	18.5398	17.5908	18.8706	16.9413	14.8957	17.0239	17.5164	17.14	18.5558	15.0634	19.0378	18.0713	18.9989	18.7939	18.7523	18.3708	20.3938	20.5624	18.3739	18.3994	19.4123	18.915	15.115	19.6042	18.3918	19.3753	20.3008	16.073	19.6249	ARRB2	P32121	Beta-arrestin-2 OS=Homo sapiens OX=9606 GN=ARRB2 PE=1 SV=2	4	41
19.5168	19.4762	20.0417	19.8188	17.5864	19.5387	19.5108	19.4616	19.0344	19.5303	19.6652	19.1805	19.318	19.4469	19.273	19.5653	19.7742	19.3176	19.5076	19.6748	19.1913	19.7013	19.0679	19.4572	19.834	19.7114	19.2609	18.9926	19.5854	19.6718	19.8577	17.1872	19.1256	19.291	19.5317	19.5645	19.725	19.4945	18.99	18.5009	18.6618	20.0207	19.3298	18.9836	18.5788	ANKRD50	Q9ULJ7	Ankyrin repeat domain-containing protein 50 OS=Homo sapiens OX=9606 GN=ANKRD50 PE=1 SV=4	4	41
18.9471	18.9062	18.588	18.9964	NaN	18.4693	18.42	18.5733	18.836	18.7744	18.2071	18.6608	18.6599	18.3564	18.8568	18.8803	18.8891	18.5466	18.6578	18.5804	18.8601	19.0297	18.3391	18.8056	18.6542	18.9923	18.5456	17.6804	18.6258	18.8141	18.6366	18.2092	18.2253	18.8231	18.5509	18.8046	18.6508	18.6518	18.5614	19.0977	18.6218	19.1368	18.363	NaN	18.4978	ANKRD54	Q6NXT1	Ankyrin repeat domain-containing protein 54 OS=Homo sapiens OX=9606 GN=ANKRD54 PE=1 SV=2	4	39
19.5484	19.2701	19.393	19.1432	19.2584	19.5061	19.6615	18.957	19.8077	19.7933	20.0784	21.0279	20.0846	19.2907	20.9964	20.411	19.5453	19.1728	19.9141	19.7597	19.9108	19.6416	18.9583	19.962	19.427	20.6301	19.8991	18.9461	18.5093	19.519	19.3088	19.6021	20.4011	19.5198	19.7458	19.9441	19.3313	19.6162	19.8496	19.6544	20.4602	20.5441	19.5627	NaN	20.7039	ANKRD9	Q96BM1	Ankyrin repeat domain-containing protein 9 OS=Homo sapiens OX=9606 GN=ANKRD9 PE=2 SV=1	4	40
21.2791	21.4673	21.3724	20.8691	20.9588	21.3234	21.5907	21.5723	21.2312	20.7155	21.6155	21.6537	21.2311	21.2768	21.2868	21.3994	21.7056	21.281	21.0201	21.2672	21.5397	21.3598	21.4218	21.4068	21.1985	20.2478	21.7058	21.362	21.2836	21.2226	21.3534	20.7752	21.4011	21.0996	21.1172	21.353	20.9454	21.0092	21.1082	21.0537	20.8242	20.2597	21.3514	17.4797	20.5285	SOWAHC	Q53LP3	Ankyrin repeat domain-containing protein SOWAHC OS=Homo sapiens OX=9606 GN=SOWAHC PE=1 SV=1	4	41
NaN	NaN	NaN	NaN	15.1691	13.3799	13.5736	NaN	NaN	15.1386	15.5969	14.9392	NaN	NaN	16.6835	NaN	NaN	13.7967	NaN	NaN	NaN	NaN	NaN	NaN	NaN	NaN	NaN	NaN	NaN	NaN	NaN	NaN	14.8251	14.8936	NaN	NaN	NaN	NaN	NaN	15.135	NaN	NaN	15.3039	NaN	NaN	SOWAHD	A6NJG2	Ankyrin repeat domain-containing protein SOWAHD OS=Homo sapiens OX=9606 GN=SOWAHD PE=2 SV=1	0	12
20.9259	20.9092	20.8208	20.5526	21.2812	21.1279	20.5397	21.0623	23.098	20.9766	21.4345	21.5491	21.3606	21.2531	21.3402	26.5687	26.6771	21.6037	21.3837	24.1534	26.9877	21.4813	21.1664	21.3591	20.7212	25.9504	20.6038	20.5025	21.4505	20.8379	21.1754	21.0202	27.4657	20.8816	20.9568	25.1433	21.3784	20.9759	20.6527	21.6782	20.7751	21.1443	21.1344	22.9817	20.6706	ANK1	P16157	Ankyrin-1 OS=Homo sapiens OX=9606 GN=ANK1 PE=1 SV=3	4	41
22.614	22.9435	23.0577	22.4527	22.7436	22.7788	22.8176	22.8512	23.1107	21.7442	22.8028	22.8533	22.6748	22.7093	22.6604	22.9887	23.1044	23.0187	23.0257	22.9708	23.208	23.0786	23.2062	23.0162	23.0778	22.1624	21.8787	22.8983	23.0007	22.9167	22.9844	22.8852	22.6922	22.7597	22.9305	22.5716	22.8066	22.9643	23.1552	22.9967	22.8609	22.8504	23.0191	20.4345	22.7615	ANK2	Q01484	Ankyrin-2 OS=Homo sapiens OX=9606 GN=ANK2 PE=1 SV=4	4	41
20.9743	20.2711	20.6254	19.9191	20.726	21.1839	21.0567	20.7382	21.0237	20.3122	21.8262	21.1088	20.3472	21.15	20.6605	20.6955	21.2445	21.173	20.8241	20.5154	21.1344	20.6857	20.5185	20.7313	20.4951	19.1976	19.3577	20.8857	20.1473	20.451	21.2474	21.0923	19.8631	21.202	19.9513	20.2001	20.5653	20.6264	20.5225	20.5238	20.127	20.236	20.373	18.9897	20.7135	ANK3	Q12955	Ankyrin-3 OS=Homo sapiens OX=9606 GN=ANK3 PE=1 SV=3	4	41
31.013	31.0625	31.1314	31.0021	31.1829	31.1452	31.0804	31.1293	31.2216	32.3631	31.0734	31.4859	31.3559	31.1834	31.5533	31.4033	31.1807	31.2335	31.1272	31.0851	31.1108	31.2619	31.1652	31.1176	31.2892	31.8734	31.1304	31.2423	31.2492	31.2455	31.2165	31.0932	31.3899	31.1841	31.1082	31.2794	31.1772	31.2279	31.2417	31.2552	31.3503	31.8333	31.3661	32.3419	31.0444	ANXA1	P04083	Annexin A1 OS=Homo sapiens OX=9606 GN=ANXA1 PE=1 SV=2	4	41
26.7131	26.7238	26.7207	26.6381	27.0589	27.1013	26.6967	26.8583	26.8755	28.7349	26.7698	27.12	27.0287	26.7669	27.331	27.3091	26.9418	26.7035	26.955	27.0753	26.8316	26.9355	26.9214	26.7982	26.9681	28.2335	26.7794	26.8358	26.9304	27.0615	27.0268	26.7684	27.3613	27.1281	26.8815	27.219	27.1066	26.8465	26.8668	26.9217	27.2517	27.2224	27.032	30.3406	26.6743	ANXA11	P50995	Annexin A11 OS=Homo sapiens OX=9606 GN=ANXA11 PE=1 SV=1	4	41
19.0023	20.6868	20.5273	20.2016	19.5926	19.5133	19.3501	19.6427	19.8622	20.983	19.4621	18.4159	19.2867	21.0894	20.8962	20.4152	20.559	NaN	19.0416	20.7107	20.9252	18.8111	20.3293	19.8287	20.0187	20.0712	NaN	20.5479	20.5261	20.8518	NaN	NaN	20.4527	NaN	NaN	NaN	20.6509	NaN	NaN	NaN	NaN	NaN	NaN	20.3982	20.3941	ANXA13	P27216	Annexin A13 OS=Homo sapiens OX=9606 GN=ANXA13 PE=1 SV=3	4	28
33.1283	32.9957	32.9904	32.9981	32.8395	32.9332	32.9434	33.0343	33.2225	33.2569	33.0043	32.8606	33.2011	33.0713	32.8422	33.1169	32.9949	33.0668	33.0576	33.1402	33.2984	33.152	33.0624	33.0706	32.9069	33.0578	32.5739	32.9521	32.9272	33.3015	33.0535	33.0643	32.9702	32.9309	33.0683	32.9895	33.0926	33.0287	33.1228	32.9315	33.2498	33.0544	33.0279	32.9036	32.9578	ANXA2	P07355	Annexin A2 OS=Homo sapiens OX=9606 GN=ANXA2 PE=1 SV=2	4	41
26.3136	25.9602	26.2322	26.6169	25.6666	25.8309	25.6037	25.4883	25.5081	25.1027	24.7213	25.2182	25.4623	25.6293	25.0919	25.7705	25.7686	26.2005	25.7162	25.8446	26.5728	25.8881	25.7216	25.6543	25.5669	24.1636	24.8082	25.519	25.803	25.0522	25.7197	25.4158	26.1522	25.9676	25.4926	25.9265	26.1511	25.7955	25.9798	25.5984	26.0026	25.7051	25.6334	22.6706	25.5421	CCN2 (CTGF)	P29279	CCN family member 2 OS=Homo sapiens OX=9606 GN=CCN2 PE=1 SV=2	4	41
28.1948	28.1138	28.1174	28.1991	28.0923	28.0878	28.0202	28.1384	28.1005	29.352	28.0111	28.1005	28.0547	28.1396	28.4938	28.4232	28.2182	28.1652	28.1711	28.1492	28.1079	28.1331	28.014	28.0997	28.1715	29.0015	27.8107	28.264	28.1439	28.1889	28.3071	28.2906	28.2883	28.2259	28.236	28.3793	28.2903	28.2619	28.1677	28.2811	28.4044	28.6789	28.1757	29.5813	28.1041	ANXA4	P09525	Annexin A4 OS=Homo sapiens OX=9606 GN=ANXA4 PE=1 SV=4	4	41
31.9407	31.9346	31.8694	31.7782	31.7347	31.7159	31.8209	31.8122	31.853	32.2818	31.7136	31.7845	31.7711	31.7704	31.7138	31.9808	31.8247	31.8688	31.8831	31.8224	31.9765	31.9902	31.9273	31.9072	31.8635	32.1515	31.8378	31.7749	31.7485	31.9196	31.91	31.8781	31.7251	31.7505	31.8147	31.9366	31.7851	31.8869	31.8734	31.8084	32.0275	31.8814	31.8081	32.0824	31.8667	ANXA5	P08758	Annexin A5 OS=Homo sapiens OX=9606 GN=ANXA5 PE=1 SV=2	4	41
30.9069	30.844	30.8701	30.8454	30.9014	30.8624	30.8322	30.8262	30.9018	31.3309	30.874	30.9279	30.8034	30.8788	30.9652	31.0438	30.8616	30.8262	30.8555	30.8952	30.9589	30.9047	30.9081	30.9071	30.9473	31.3218	30.8921	30.8695	30.83	31.0256	30.8963	30.8864	31.0331	30.8115	30.9233	31.0655	30.929	30.8445	30.8576	30.75	30.9916	30.7691	30.9026	32.316	30.8263	ANXA6	P08133	Annexin A6 OS=Homo sapiens OX=9606 GN=ANXA6 PE=1 SV=3	4	41
26.9818	27.0839	27.1158	27.1709	27.2912	27.2612	27.1631	27.0514	27.1463	28.2456	27.1035	27.4263	27.1821	27.2281	27.5947	27.5164	27.264	27.239	27.041	27.0851	27.3263	27.1563	27.106	27.0471	27.1381	27.8778	27.0495	27.1884	27.2301	27.1574	27.2976	27.0626	27.5204	27.2234	27.2032	27.6509	27.2489	27.0761	27.0334	27.3545	27.4162	27.6666	27.1094	29.1441	27.0398	ANXA7	P20073	Annexin A7 OS=Homo sapiens OX=9606 GN=ANXA7 PE=1 SV=3	4	41
25.0267	25.026	25.0748	25.0952	25.0455	24.9333	25.0068	24.7528	24.8352	25.3402	24.8895	25.0815	24.7971	24.8788	25.0863	25.1642	25.0299	24.9672	24.8772	24.9511	25.0783	25.1099	24.9809	25.0327	25.031	25.3144	25.2897	24.8849	24.8941	24.7667	24.995	25.0184	25.0019	25.0403	25.0453	25.193	25.1224	25.1204	24.9719	24.984	25.4492	25.3799	25.0022	25.1309	25.1784	ANO10	Q9NW15	Anoctamin-10 OS=Homo sapiens OX=9606 GN=ANO10 PE=1 SV=2	4	41
23.6345	23.391	23.583	23.9082	23.7339	23.7498	23.7362	23.7583	24.0438	24.382	24.1095	23.8491	24.3549	23.7936	23.6017	23.3773	23.4606	23.5587	23.6398	23.7519	23.5231	23.8198	23.5019	23.7693	23.8983	24.1817	23.5648	23.665	23.7226	23.6904	23.67	23.859	23.7869	23.7663	23.4356	23.5312	23.744	23.9379	23.9551	23.7325	23.9156	23.5944	23.9612	23.8924	23.8379	ANO6	Q4KMQ2	Anoctamin-6 OS=Homo sapiens OX=9606 GN=ANO6 PE=1 SV=2	4	41
25.8637	25.8015	25.8305	25.6098	26.1593	25.9656	26.0936	26.236	26.2893	25.7575	26.1039	25.8598	25.8613	25.935	26.1428	26.1012	25.9954	25.8524	25.8999	25.879	26.0537	25.9465	25.8523	25.929	25.6911	25.4152	25.7181	26.0874	25.7601	25.8786	25.9402	26.1806	25.9864	26.052	25.941	26.0453	25.9406	25.9591	26.0431	26.2921	26.0556	26.0861	25.9941	25.0259	26.107	ANTXR1	Q9H6X2	Anthrax toxin receptor 1 OS=Homo sapiens OX=9606 GN=ANTXR1 PE=1 SV=2	4	41
24.084	24.3212	24.2478	23.9739	23.9133	24.8418	25.5611	24.2394	24.2599	25.3046	25.7684	24.8838	24.399	24.0419	24.9115	24.7392	24.8264	24.5022	24.5607	24.4984	24.268	24.5277	24.69	24.9442	24.6204	25.9961	26.8086	24.6612	24.6402	24.8644	25.4433	25.15	24.2963	25.0585	24.7125	25.0201	24.7802	24.3827	24.6872	24.6457	25.055	25.2284	24.3982	25.3783	25.634	CD82	P27701	CD82 antigen OS=Homo sapiens OX=9606 GN=CD82 PE=1 SV=1	4	41
16.7983	16.9137	16.7823	18.8537	16.1968	19.2363	19.254	17.4816	16.6841	19.8615	19.3837	21.0978	18.9786	17.1199	21.4296	19.7084	17.9367	18.0382	19.0616	18.9518	19.9421	20.426	19.2949	17.0838	20.0897	20.1099	18.77	20.1796	20.0648	18.4182	19.7309	19.331	18.8239	20.2392	18.8841	17.2103	16.8742	16.7741	16.4321	17.7475	19.4553	19.7619	16.6834	20.1881	17.2682	TAPBPL	Q9BX59	Tapasin-related protein OS=Homo sapiens OX=9606 GN=TAPBPL PE=1 SV=2	4	41
18.6199	18.4765	18.2679	18.6073	20.134	19.3608	20.0868	20.0173	19.3872	19.785	19.9415	19.8893	19.7894	20.0346	19.9735	19.0969	19.6407	19.3126	18.3463	18.7495	18.9388	19.8086	19.6506	18.7934	19.8321	19.2022	20.6157	18.0502	19.0319	19.8859	18.1459	19.4214	19.4639	20.0991	20.008	19.4662	20.0184	20.1477	19.5806	19.333	18.8784	20.7012	20.2595	18.2849	20.1699	CDK2	P24941	Cyclin-dependent kinase 2 OS=Homo sapiens OX=9606 GN=CDK2 PE=1 SV=2	4	41
25.8811	25.9612	25.8545	25.9785	25.9467	25.9268	25.9537	25.9079	25.8405	26.1727	25.9327	26.1157	25.7382	26.1001	26.0056	25.8791	26.0254	25.9817	25.9654	25.9101	25.8819	25.9905	25.937	26.0517	25.9201	25.995	26.1587	25.959	25.9426	25.9302	26.0837	25.9531	25.9227	26.0584	25.9247	25.9432	25.9384	25.81	26.0001	25.9942	25.9374	25.9901	26.0034	25.181	25.8071	AP1G1	O43747	AP-1 complex subunit gamma-1 OS=Homo sapiens OX=9606 GN=AP1G1 PE=1 SV=5	4	41
25.6076	25.3346	25.6591	25.3922	25.5749	25.4327	25.5907	25.5648	25.4791	25.3467	25.5627	25.7111	25.5534	25.8676	25.7394	25.5842	25.5888	25.6185	25.6073	25.5103	25.511	25.6548	25.4624	25.6539	25.5903	25.5239	25.7585	25.5232	25.7033	25.4121	25.5596	25.6349	25.5417	25.6998	25.6441	25.4834	25.5773	25.6077	25.5499	25.666	25.4954	25.5488	25.7102	24.7571	25.7408	AP1M1	Q9BXS5	AP-1 complex subunit mu-1 OS=Homo sapiens OX=9606 GN=AP1M1 PE=1 SV=3	4	41
24.5331	24.5498	24.7004	24.4398	24.1683	24.1402	24.2832	24.5125	24.3641	24.3453	24.5062	24.5019	24.3504	24.532	24.4592	24.41	24.4082	24.4599	24.4094	24.3261	24.6672	24.6763	24.6378	24.8697	24.6357	24.6464	24.5099	24.4466	24.6407	24.4596	24.472	24.667	24.3762	24.4618	24.507	24.4779	24.4496	24.5476	24.4756	24.6336	24.7282	24.4519	24.5757	23.7836	24.5438	AP1S1	P61966	AP-1 complex subunit sigma-1A OS=Homo sapiens OX=9606 GN=AP1S1 PE=1 SV=1	4	41
20.7685	20.3485	19.4987	20.8399	21.1062	20.7281	20.8019	20.8279	20.4632	21.3789	21.0006	21.2777	20.9538	21.8199	21.6506	20.4139	20.5856	20.8924	19.8402	20.4698	19.52	20.7082	19.4435	21.5866	20.741	20.3557	21.9065	21.4927	21.6805	21.3515	21.5899	21.5746	21.8849	21.907	20.7483	21.4855	20.0514	19.6348	20.7504	20.3069	19.5536	20.6592	20.66	20.2773	21.8752	AP1S2	P56377	AP-1 complex subunit sigma-2 OS=Homo sapiens OX=9606 GN=AP1S2 PE=1 SV=1	4	41
27.9049	27.9122	27.9527	27.9671	27.616	27.6542	27.6931	27.4861	27.6047	27.4786	27.6495	27.9694	27.4318	27.6039	27.6177	28.0173	27.9549	27.927	27.9061	27.7376	27.7035	27.7775	27.9273	27.9333	27.6267	27.9203	28.003	27.8475	27.8772	27.8456	27.8881	27.8683	27.7316	27.9396	27.8949	27.8814	27.9169	27.7711	27.8488	27.877	27.8974	27.8777	27.8473	27.1606	27.8608	AP2A1	O95782	AP-2 complex subunit alpha-1 OS=Homo sapiens OX=9606 GN=AP2A1 PE=1 SV=3	4	41
25.3768	25.4699	25.5117	25.1704	25.5245	25.5548	25.6577	25.716	25.4943	25.4015	25.3462	25.546	25.5113	25.2952	25.602	25.5348	25.6036	25.5524	25.4037	25.6337	25.609	25.4834	25.5665	25.7464	25.6122	25.3406	25.4118	25.1484	25.4524	25.977	25.5886	25.289	25.2762	25.439	25.5492	25.4565	25.2718	25.2253	25.6858	25.4156	25.8309	25.2935	25.3546	24.2501	25.2153	AP2A2	O94973	AP-2 complex subunit alpha-2 OS=Homo sapiens OX=9606 GN=AP2A2 PE=1 SV=2	4	41
28.1182	28.1628	28.1741	28.1439	28.1807	28.1403	28.1233	28.1192	28.0425	27.9671	28.0491	28.1769	28.0472	28.1978	28.0627	28.2174	28.1324	28.0954	28.1084	28.2221	28.2808	28.2009	28.1602	28.2443	28.2403	28.032	28.2505	28.0785	28.2152	28.2334	28.2682	28.1213	28.1525	28.1164	28.1775	28.1253	28.2215	28.1229	28.166	28.1857	28.171	28.0888	28.1842	27.017	28.1686	AP2B1	P63010	AP-2 complex subunit beta OS=Homo sapiens OX=9606 GN=AP2B1 PE=1 SV=1	4	41
27.1788	26.845	26.918	27.0054	27.0677	27.0161	26.983	27.0984	27.0486	26.7332	26.9569	27.0576	27.0171	26.9073	26.992	26.999	27.097	27.1358	27.0016	27.0777	27.0937	27.0563	26.9319	26.9876	26.8746	26.826	26.8874	27.0176	26.8936	27.0145	27.0044	27.0418	26.8815	26.9043	26.9424	26.8643	27.0368	26.8677	27.0615	26.939	26.9256	26.9314	26.8473	25.8946	27.1055	AP2M1	Q96CW1	AP-2 complex subunit mu OS=Homo sapiens OX=9606 GN=AP2M1 PE=1 SV=2	4	41
24.9215	24.9405	24.9994	25.2045	25.1178	24.6585	24.7396	24.8132	24.8887	25.0524	24.9089	24.7696	24.6823	24.5184	24.7964	25.0146	25.0032	24.7286	24.6672	24.7843	24.8309	25.0161	24.753	25.2334	24.735	25.1838	25.089	25.0295	24.7445	24.9314	25.0482	25.0232	24.7617	25.1656	24.8694	25.0405	24.9696	25.1499	24.7101	24.9956	25.07	25.1863	24.7814	24.7944	25.2435	AP2S1	P53680	AP-2 complex subunit sigma OS=Homo sapiens OX=9606 GN=AP2S1 PE=1 SV=2	4	41
24.3642	24.6199	24.3179	24.3479	24.2224	24.2729	24.4356	24.1064	24.1628	24.1803	24.4134	24.409	24.3635	24.2321	24.4608	24.2505	24.7851	24.795	24.1259	24.1707	24.461	24.578	24.2359	24.3688	24.5037	24.0023	24.3024	24.4916	24.2938	24.4014	24.47	24.3133	24.358	24.195	24.5202	24.3253	24.4772	24.3482	24.1708	23.9713	24.188	24.3749	24.2015	22.1467	23.9145	AAK1	Q2M2I8	AP2-associated protein kinase 1 OS=Homo sapiens OX=9606 GN=AAK1 PE=1 SV=3	4	41
29.6163	29.2092	28.9867	29.2675	29.0837	29.1413	29.0604	29.2264	29.1807	29.2563	29.2191	29.0396	29.0898	29.3186	29.0645	29.246	29.0602	29.4774	29.4609	29.2081	29.2352	29.1716	29.1086	29.1436	29.086	28.973	28.9418	29.4926	29.241	29.3284	29.3215	29.3677	29.0394	29.2112	29.2327	29.1554	29.3321	29.279	29.2748	29.1392	29.1189	29.345	29.1045	29.0617	29.2314	AP3B1	O00203	AP-3 complex subunit beta-1 OS=Homo sapiens OX=9606 GN=AP3B1 PE=1 SV=3	4	41
26.475	26.5557	26.4579	26.2959	26.3536	26.366	26.2217	26.3943	26.6597	26.4014	26.5924	26.4086	26.4564	26.4202	26.3684	26.4514	26.2972	26.3584	26.5145	26.4035	26.3773	26.6742	26.4256	26.6304	26.4406	26.5146	26.6462	26.4889	26.5139	26.4887	26.3868	26.6087	26.6138	26.3905	26.3094	26.4543	26.4051	26.4109	26.211	26.5372	26.3134	26.3645	26.3392	25.6278	26.6066	AP3D1	O14617	AP-3 complex subunit delta-1 OS=Homo sapiens OX=9606 GN=AP3D1 PE=1 SV=1	4	41
25.2586	25.4105	25.3284	25.0925	25.2765	25.3366	25.3916	25.2138	25.2025	25.0736	25.2254	25.4851	25.2252	25.3487	25.3901	25.3347	25.3961	25.433	25.3039	25.2064	25.3219	25.4405	25.4126	25.5051	25.4946	25.4334	25.4049	25.2377	25.2093	25.3633	25.2881	25.2152	25.3547	25.3079	25.2713	25.1731	25.3747	25.2534	25.2734	25.2407	25.2656	25.2679	25.1765	24.262	25.307	AP3M1	Q9Y2T2	AP-3 complex subunit mu-1 OS=Homo sapiens OX=9606 GN=AP3M1 PE=1 SV=1	4	41
22.5216	22.8036	22.5498	22.4121	22.3127	22.9841	22.4623	22.4465	22.5413	21.707	22.3893	22.4398	22.3943	22.5007	22.8425	22.7851	22.7157	22.7211	22.5762	22.2981	22.6457	22.7367	22.7589	22.8948	22.6431	22.6229	22.7419	22.4285	22.6689	22.5011	22.7634	22.6915	22.7168	22.7482	22.7558	22.6091	22.6973	22.481	22.5079	22.6651	22.6791	22.4297	22.5612	20.9735	22.731	AP3M2	P53677	AP-3 complex subunit mu-2 OS=Homo sapiens OX=9606 GN=AP3M2 PE=1 SV=1	4	41
24.5648	24.6433	24.6053	24.2808	24.6936	24.5623	24.6098	24.6532	24.6439	24.3575	24.6666	24.663	24.5696	24.4659	24.701	24.4875	24.9205	24.5887	24.6871	24.5138	24.6285	24.7659	24.8778	24.7064	24.5147	24.33	24.609	24.585	24.6316	24.4821	24.5753	24.6425	24.5004	24.5302	24.4919	24.3635	24.4171	24.6786	24.3293	24.3214	24.4282	24.4729	24.5605	23.6738	24.5945	AP3S1	Q92572	AP-3 complex subunit sigma-1 OS=Homo sapiens OX=9606 GN=AP3S1 PE=1 SV=1	4	41
24.9605	24.496	24.5657	25.0532	24.4888	24.548	25.022	24.3536	24.6629	25.2912	24.7941	24.6619	24.4898	24.7355	24.9613	24.5183	24.7791	25.0248	25.2131	24.6712	24.6998	24.7143	24.585	24.283	24.6712	25.0343	25.2303	24.7486	24.6563	24.1787	24.3927	24.8719	25.0154	25.1694	24.6886	24.6485	24.964	25.062	25.2057	25.1557	25.429	25.547	24.7094	19.5276	25.0407	TEPSIN	Q96N21	AP-4 complex accessory subunit Tepsin OS=Homo sapiens OX=9606 GN=TEPSIN PE=1 SV=1	4	41
20.7251	20.5042	20.2511	20.5475	19.5277	20.4136	20.7085	20.5222	20.562	20.0157	20.6152	20.6726	20.2687	19.7471	20.5191	20.8788	19.99	19.9634	20.5434	20.4953	20.6677	20.307	20.6861	20.8738	20.8429	20.8627	20.0071	20.032	20.2851	20.9043	20.4982	19.9653	20.5075	20.099	20.3195	20.6765	19.9187	20.4467	20.1043	20.6869	19.9395	20.6434	20.6294	19.5689	19.9461	AP4B1	Q9Y6B7	AP-4 complex subunit beta-1 OS=Homo sapiens OX=9606 GN=AP4B1 PE=1 SV=2	4	41
24.7831	25.0124	25.1102	25.2122	24.1665	24.1954	24.5554	24.3122	24.5096	24.5732	24.7657	24.5529	24.3818	24.4438	24.6242	24.7138	24.7293	24.7114	25.0122	25.0079	24.8341	25.4227	25.1301	24.4893	24.4959	24.7495	24.6627	24.8337	24.962	24.6488	24.7079	25.0751	24.7866	25.1162	24.9847	25.0409	24.9749	25.0925	24.9438	24.9589	25.1679	25.168	25.1316	24.6103	24.5002	AP4E1	Q9UPM8	AP-4 complex subunit epsilon-1 OS=Homo sapiens OX=9606 GN=AP4E1 PE=1 SV=2	4	41
22.2294	22.5534	22.0257	22.1579	22.7942	22.8193	22.5654	22.4448	22.3801	25.3113	22.549	23.6488	23.2867	22.5638	23.7042	23.0156	18.9011	22.4772	22.5423	22.4742	22.6673	22.5101	21.0162	21.1279	23.1432	24.0417	20.694	22.9224	18.4207	22.4974	22.1795	18.8531	22.5789	22.7388	22.4685	23.0709	20.3857	22.3576	18.6885	23.3062	22.6506	23.2785	22.6392	24.3661	19.4164	AP4M1	O00189	AP-4 complex subunit mu-1 OS=Homo sapiens OX=9606 GN=AP4M1 PE=1 SV=2	4	41
14.3296	16.0518	15.2696	18.5168	20.117	17.8378	15.1634	18.8438	17.3555	19.6218	16.971	19.5728	17.0083	17.3178	19.6322	18.8843	17.0903	17.1543	18.6566	19.4723	15.789	15.5451	15.4137	16.051	19.0299	19.6828	15.4869	15.6858	16.5835	16.4808	18.7103	NaN	16.0981	16.1805	18.4124	19.6323	18.69	NaN	16.5334	19.5074	18.9547	19.1596	15.3867	19.4466	18.3967	WRNIP1	Q96S55	ATPase WRNIP1 OS=Homo sapiens OX=9606 GN=WRNIP1 PE=1 SV=2	4	39
22.9211	23.1339	23.0431	22.983	22.5083	22.294	22.3909	22.4008	22.6297	21.7239	22.1779	22.202	22.303	22.4848	22.5559	22.3686	22.4621	22.6469	22.6233	22.5437	22.4761	22.5889	22.6984	22.84	22.6586	22.2971	22.1688	22.4256	22.5748	22.3202	22.3257	22.5368	22.3834	22.6032	22.5658	22.5729	22.5444	22.5988	22.5454	22.5982	22.425	22.5068	22.4593	21.2906	22.5476	CDKN1A	P38936	Cyclin-dependent kinase inhibitor 1 OS=Homo sapiens OX=9606 GN=CDKN1A PE=1 SV=3	4	41
19.5431	19.7625	19.6355	19.2403	19.5937	19.4814	19.5856	19.5821	19.4807	19.8702	19.3146	19.8978	19.5114	19.6486	19.727	18.6221	19.455	19.6079	19.5805	19.3508	19.6589	20.0135	19.5763	19.4699	19.4578	19.73	19.5007	19.4404	19.2131	19.5158	19.3887	18.9486	19.8015	19.6378	19.1943	19.931	19.721	19.4005	19.428	19.6709	19.4412	19.8345	19.5407	18.2536	19.559	AP5M1	Q9H0R1	AP-5 complex subunit mu-1 OS=Homo sapiens OX=9606 GN=AP5M1 PE=1 SV=2	4	41
18.0464	18.7058	18.03	17.3261	NaN	18.2156	17.9801	18.7352	18.2851	17.5424	18.0677	NaN	18.3866	18.3929	18.6183	18.565	18.7565	NaN	18.7837	18.8147	17.9964	18.3057	NaN	18.2706	NaN	NaN	NaN	17.2922	17.739	19.1989	NaN	NaN	NaN	17.378	17.855	NaN	NaN	NaN	18.9834	NaN	18.0099	NaN	NaN	NaN	16.7311	AP5S1	Q9NUS5	AP-5 complex subunit sigma-1 OS=Homo sapiens OX=9606 GN=AP5S1 PE=1 SV=1	4	24
21.6723	21.8829	21.8459	21.6995	21.7179	21.49	21.5612	21.7395	21.7342	21.3712	21.7987	21.9649	21.6031	21.5747	21.8808	21.8336	21.6887	21.8909	21.7922	21.6479	21.888	21.8239	22.0021	21.79	21.9941	21.7051	21.5905	21.5351	21.5658	21.7253	21.6517	21.7502	21.8995	21.9315	21.5462	21.765	21.631	21.6862	21.5742	21.434	21.9618	21.9619	21.5504	20.3835	21.5147	AP5Z1	O43299	AP-5 complex subunit zeta-1 OS=Homo sapiens OX=9606 GN=AP5Z1 PE=1 SV=2	4	41
NaN	NaN	NaN	NaN	NaN	18.0585	18.838	17.5285	NaN	18.2854	18.2244	20.0768	NaN	NaN	19.0442	NaN	NaN	17.1691	17.5744	NaN	NaN	NaN	NaN	NaN	NaN	17.675	17.7892	NaN	NaN	NaN	19.5042	19.5847	18.3316	NaN	NaN	NaN	18.1654	NaN	NaN	NaN	NaN	NaN	20.3464	19.4565	18.85	APOBR	Q0VD83	Apolipoprotein B receptor OS=Homo sapiens OX=9606 GN=APOBR PE=1 SV=3	0	18
16.7355	17.2923	16.6231	17.2448	16.9287	17.1132	17.3178	16.7122	16.4181	16.2169	16.6727	16.4802	17.1011	16.5198	16.7827	16.8855	16.3782	17.0661	16.7095	17.8584	16.6266	17.1801	17.0518	17.0101	17.2816	NaN	16.9028	16.9593	16.8494	16.358	17.8128	17.8268	17.7642	17.2305	16.7458	16.3798	17.0342	16.3751	17.8319	17.064	17.8659	17.2661	16.6219	16.102	16.9242	APOB	P04114	Apolipoprotein B-100 OS=Homo sapiens OX=9606 GN=APOB PE=1 SV=2	4	40
12.8189	14.6876	13.8009	16.5059	12.982	13.2291	13.2971	NaN	13.223	13.4046	13.5473	NaN	14.6123	16.5392	13.5534	16.9974	15.1333	16.6784	13.5461	15.6703	NaN	NaN	NaN	16.1155	13.7256	16.5265	16.6663	NaN	16.1931	17.2684	16.4329	16.3665	16.8842	17.1197	16.5586	16.01	16.2249	17.1906	16.9733	16.4648	17.8442	17.4998	17.096	16.2478	17.199	RCBTB1	Q8NDN9	RCC1 and BTB domain-containing protein 1 OS=Homo sapiens OX=9606 GN=RCBTB1 PE=1 SV=1	4	35
18.7305	NaN	NaN	19.4619	23.2672	23.2781	NaN	23.0957	23.1968	24.4507	NaN	23.0009	NaN	18.236	23.1927	20.8731	18.6961	17.9255	19.5621	23.1698	23.396	NaN	NaN	17.8609	NaN	23.4105	NaN	NaN	22.6374	NaN	NaN	19.5135	NaN	18.4446	18.1771	21.1878	NaN	17.818	NaN	18.8346	18.7942	20.2698	18.2789	24.9852	18.0761	APOD	P05090	Apolipoprotein D OS=Homo sapiens OX=9606 GN=APOD PE=1 SV=1	2	28
22.0836	16.4963	16.1186	20.7987	21.7601	20.5274	20.8406	21.3431	21.3541	19.4944	20.8673	20.9959	20.3155	21.1549	21.0115	19.301	21.5665	20.9263	21.2745	17.9544	20.2934	21.6833	20.1211	20.3279	21.179	19.8838	20.5001	21.0808	20.7683	20.6733	21.0799	20.2076	20.8627	20.5592	20.1632	21.6663	18.592	19.0984	21.3277	21.0995	19.9754	20.0852	21.8779	15.7423	20.5775	SMARCC1	Q92922	SWI/SNF complex subunit SMARCC1 OS=Homo sapiens OX=9606 GN=SMARCC1 PE=1 SV=3	4	41
23.2421	22.0152	22.7029	23.0079	23.162	23.4482	23.6389	23.1835	22.9978	22.4504	23.0208	23.1358	23.4674	22.6058	22.9251	22.778	22.902	22.7721	23.3819	22.3251	21.8961	23.0668	22.4876	23.3686	22.5523	23.0948	23.1858	23.01	22.8242	23.3159	23.5466	23.0926	22.692	24.0076	22.7516	22.6697	23.1737	23.0972	23.1761	23.4521	22.2773	22.3518	23.077	21.6204	23.5536	APOL2	Q9BQE5	Apolipoprotein L2 OS=Homo sapiens OX=9606 GN=APOL2 PE=1 SV=1	4	41
19.7828	19.5218	19.8256	21.8634	22.4669	20.7695	20.0052	22.4761	22.2572	24.8795	21.8894	21.1696	22.9974	21.1586	22.8659	22.1728	18.0247	22.9653	19.3687	19.9938	20.8986	22.3578	19.4323	20.9007	19.6981	24.4587	19.8874	22.218	22.7874	19.7868	23.0276	20.6505	25.0958	21.9136	22.9792	24.3876	22.2764	21.8769	18.2853	19.227	23.0378	23.916	22.72	17.1071	20.898	POLR2D	O15514	DNA-directed RNA polymerase II subunit RPB4 OS=Homo sapiens OX=9606 GN=POLR2D PE=1 SV=1	4	41
25.1623	25.022	24.9492	25.3756	24.9592	25.037	24.8868	25.0481	25.0834	26.0135	24.9834	25.0059	24.5743	24.8024	25.133	24.9314	24.9788	25.1423	24.946	24.9807	24.871	24.976	24.83	25.0568	24.7951	25.3762	24.9592	25.1323	25.0671	25.2052	25.2688	25.0823	24.9493	25.0691	25.1138	25.237	25.1111	25.3081	25.2977	25.1172	25.5243	25.4544	25.1241	25.9712	25.3149	BAX	Q07812	Apoptosis regulator BAX OS=Homo sapiens OX=9606 GN=BAX PE=1 SV=1	4	41
NaN	NaN	NaN	NaN	18.5755	18.2457	14.7046	15.4993	15.1079	16.351	14.785	19.3214	19.4574	18.6232	15.0968	NaN	18.1675	NaN	13.7024	18.4188	NaN	18.0671	NaN	NaN	NaN	NaN	NaN	NaN	NaN	NaN	NaN	NaN	NaN	13.6802	NaN	13.8484	18.2237	NaN	NaN	19.5378	NaN	14.2773	NaN	NaN	NaN	BCL2	P10415	Apoptosis regulator Bcl-2 OS=Homo sapiens OX=9606 GN=BCL2 PE=1 SV=2	0	20
16.9448	20.5483	20.915	17.0337	21.2844	20.9854	20.6784	21.7226	21.316	20.6337	20.8974	21.1461	21.328	20.9	21.1791	21.4052	22.0271	21.0793	20.5534	19.3676	21.1686	19.2188	20.1123	20.5099	20.8408	20.7422	21.2086	20.909	20.1705	21.4152	20.2179	21.0345	21.1844	21.365	20.8014	20.8557	20.2561	20.4808	17.692	21.1421	20.4265	20.7702	18.3129	19.3501	21.6929	TRIM21	P19474	E3 ubiquitin-protein ligase TRIM21 OS=Homo sapiens OX=9606 GN=TRIM21 PE=1 SV=1	4	41
24.8914	25.168	24.9149	25.102	25.2818	25.1378	24.9458	24.8956	24.8602	25.2415	25.2265	25.3105	25.0467	25.2285	25.0908	25.2764	25.08	25.0288	25.0215	24.9156	24.9755	25.1944	24.8814	25.2158	24.9972	25.652	25.1552	25.2342	25.3448	25.064	25.1606	24.9871	24.9771	25.1266	24.9204	25.3562	24.9326	25.256	24.8741	25.2254	25.1472	25.3615	24.9135	25.6652	25.3123	AIFM1	O95831	Apoptosis-inducing factor 1, mitochondrial OS=Homo sapiens OX=9606 GN=AIFM1 PE=1 SV=1	4	41
20.759	20.5654	20.2287	21.0649	20.4752	21.1339	21.1884	21.0057	20.1694	20.6208	20.9651	20.7283	20.3827	20.1501	20.6727	21.269	21.2054	20.7075	20.3478	20.8926	20.9221	20.9129	20.7878	20.7464	20.6687	21.2962	21.5508	20.7801	20.7533	20.4702	20.8267	20.7046	20.3106	20.8007	20.4561	21.0375	20.5805	20.3022	20.6766	20.429	20.4403	20.6007	20.8023	19.7199	21.0767	TP53BP2	Q13625	Apoptosis-stimulating of p53 protein 2 OS=Homo sapiens OX=9606 GN=TP53BP2 PE=1 SV=2	4	41
24.855	24.6473	24.6975	24.6663	24.7072	24.8771	24.7225	24.7631	24.6152	24.6752	24.7962	24.7861	24.4201	24.6779	24.795	24.9706	24.5417	24.7174	24.8324	24.7749	24.8703	24.8251	24.8093	24.9088	24.9639	25.2029	24.7047	24.857	24.5051	24.875	24.8275	24.7005	24.5197	24.8497	24.6382	25.1217	24.6958	24.5696	24.5177	24.6966	24.6265	24.9345	24.6222	23.9848	24.7755	ACIN1	Q9UKV3	Apoptotic chromatin condensation inducer in the nucleus OS=Homo sapiens OX=9606 GN=ACIN1 PE=1 SV=2	4	41
21.7216	22.1225	21.4439	21.4397	23.2977	21.7317	21.5012	22.0744	22.2774	21.4847	22.4357	22.7195	22.1661	21.8761	23.3735	22.2872	22.3544	22.1717	21.7572	21.9067	22.5041	22.2752	21.881	21.5806	22.2628	22.0658	21.8425	22.026	22.3657	21.9323	21.9259	22.0417	22.3996	22.3823	21.8669	21.8225	22.4517	21.7595	21.7564	21.9549	22.2314	22.0762	22.3356	20.7656	22.6539	APAF1	O14727	Apoptotic protease-activating factor 1 OS=Homo sapiens OX=9606 GN=APAF1 PE=1 SV=2	4	41
19.2141	18.9894	19.2482	18.6532	19.2804	18.7643	18.8585	19.4169	19.1616	19.573	19.0467	18.8656	18.9523	18.9235	19.0075	19.0851	19.2151	18.7415	18.8532	18.9926	19.1166	19.2112	19.1353	18.7989	19.1184	19.5512	19.1784	19.0709	19.1271	19.3906	18.6723	18.9954	19.1727	19.2269	18.9801	19.0937	18.7168	19.183	18.6569	19.2398	18.8424	19.8381	18.7283	18.7529	18.7951	APTX	Q7Z2E3	Aprataxin OS=Homo sapiens OX=9606 GN=APTX PE=1 SV=2	4	41
NaN	NaN	NaN	NaN	NaN	NaN	18.8148	NaN	NaN	NaN	18.837	NaN	NaN	NaN	NaN	20.9575	21.4756	NaN	NaN	NaN	20.7207	NaN	18.8571	NaN	NaN	20.0348	NaN	NaN	NaN	NaN	NaN	NaN	20.8084	NaN	NaN	20.1557	NaN	18.366	NaN	18.0259	NaN	NaN	18.6619	NaN	NaN	AQP1	P29972	Aquaporin-1 OS=Homo sapiens OX=9606 GN=AQP1 PE=1 SV=3	0	12
18.814	20.4394	20.3234	20.5481	18.5391	20.0189	19.9513	18.6193	19.0316	23.0766	20.3981	21.9124	19.4919	20.0186	21.3005	22.3703	20.021	19.1224	19.9048	20.0739	19.9802	20.8285	NaN	19.3462	20.1539	24.1369	21.257	20.1844	20.0181	20.8056	23.1519	20.6168	24.2691	21.1093	20.3387	21.2865	20.2587	19.856	19.9699	20.0138	20.7402	23.037	22.9654	25.1357	20.9914	ALOX5AP	P20292	Arachidonate 5-lipoxygenase-activating protein OS=Homo sapiens OX=9606 GN=ALOX5AP PE=1 SV=2	4	40
22.8624	23.0724	23.3281	22.9875	22.9149	22.8816	22.8395	22.876	22.8561	22.6526	22.7917	23.0131	22.7261	23.3142	23.3281	23.2127	23.1579	22.8711	23.0397	23.1327	23.0389	23.3419	22.9555	23.0685	22.8243	22.7935	22.9287	23.0161	23.0902	23.0817	22.9586	23.2293	23.1946	23.5696	23.4462	23.4005	22.9837	23.0512	23.407	23.2195	23.1866	23.3672	23.4504	22.0271	23.1178	GIT1	Q9Y2X7	ARF GTPase-activating protein GIT1 OS=Homo sapiens OX=9606 GN=GIT1 PE=1 SV=2	4	41
24.499	24.4322	24.4478	24.4024	24.6486	24.4153	24.5057	24.6513	24.7012	24.2302	24.5545	24.6726	24.3781	24.4312	24.6833	24.2634	24.5756	24.4149	24.3682	24.4822	24.3328	24.4843	24.5121	24.3908	24.4163	24.1167	24.5991	24.4664	24.6647	24.5362	24.4744	24.6912	24.4734	24.5006	24.559	24.6028	24.6335	24.6073	24.5267	24.7058	24.4676	24.4165	24.5651	22.8987	24.5885	GIT2	Q14161	ARF GTPase-activating protein GIT2 OS=Homo sapiens OX=9606 GN=GIT2 PE=1 SV=2	4	41
24.7105	24.9167	24.8098	24.4541	24.8024	24.8431	24.902	24.8602	24.6988	24.6524	25.1875	24.9197	24.7762	24.7607	24.8561	24.9225	24.7357	24.9642	24.688	24.5972	24.9114	24.7247	24.768	24.9326	24.7846	24.616	24.8614	24.9538	24.6182	24.7374	24.7226	25.0972	24.5118	24.6315	24.9067	24.8729	24.68	24.7813	24.6598	24.8217	24.7662	24.5517	24.5327	24.2404	24.5521	ARFIP1	P53367	Arfaptin-1 OS=Homo sapiens OX=9606 GN=ARFIP1 PE=1 SV=2	4	41
21.3631	21.0644	21.5787	21.6202	21.4222	21.6462	21.3194	21.6757	21.9314	21.5211	21.7446	21.5816	20.9543	21.6999	21.3787	21.1391	21.5984	21.7909	21.6351	21.9432	21.4703	21.9224	21.9622	21.8767	20.1969	21.9275	21.9024	20.9857	21.7547	21.7251	21.6284	20.288	21.5481	21.4023	21.4811	20.5568	20.302	21.65	22.0323	22.0157	20.0717	21.6405	21.6872	18.4992	21.4967	ARFIP2	P53365	Arfaptin-2 OS=Homo sapiens OX=9606 GN=ARFIP2 PE=1 SV=1	4	41
24.3209	25.0536	24.7272	24.4065	24.6323	24.5594	24.8199	24.4984	24.6532	24.2625	24.5694	24.6934	24.3441	24.5725	24.6006	24.5618	24.4699	24.5963	24.5463	24.8	24.6263	24.532	24.4675	24.5744	24.403	24.2515	24.9714	24.421	24.5542	24.9015	24.7495	24.7123	24.568	24.9766	24.7413	24.5156	24.673	24.6302	24.4522	24.5561	24.76	24.5586	24.5409	23.593	24.6207	AGFG1	P52594	Arf-GAP domain and FG repeat-containing protein 1 OS=Homo sapiens OX=9606 GN=AGFG1 PE=1 SV=2	4	41
NaN	NaN	NaN	NaN	20.7447	NaN	NaN	NaN	NaN	NaN	NaN	19.7351	19.3794	17.5406	19.7534	NaN	18.5729	17.4991	16.497	NaN	NaN	NaN	NaN	NaN	16.9812	NaN	16.5266	19.2126	18.2084	NaN	NaN	16.1764	18.9136	17.9792	16.3385	NaN	18.7735	NaN	NaN	19.6886	16.0891	NaN	16.6195	NaN	NaN	ACAP1	Q15027	Arf-GAP with coiled-coil, ANK repeat and PH domain-containing protein 1 OS=Homo sapiens OX=9606 GN=ACAP1 PE=1 SV=1	0	20
23.2702	23.3289	23.4782	23.1672	23.6333	23.3414	23.341	23.2066	23.2608	23.6013	23.7322	23.8025	23.2573	23.705	23.572	23.4955	23.6402	23.6056	23.5085	23.5776	23.7356	23.5429	23.3784	23.3341	23.3734	23.5145	23.4537	23.2588	23.4163	23.5547	23.556	23.2186	23.456	23.8494	23.3341	23.3872	23.5339	23.3372	23.2771	23.3458	23.5173	23.6481	23.6366	22.4809	23.6175	ACAP2	Q15057	Arf-GAP with coiled-coil, ANK repeat and PH domain-containing protein 2 OS=Homo sapiens OX=9606 GN=ACAP2 PE=1 SV=3	4	41
NaN	NaN	NaN	NaN	15.8088	NaN	NaN	NaN	NaN	17.4273	NaN	16.08	NaN	15.4448	18.5396	NaN	NaN	NaN	NaN	NaN	NaN	NaN	NaN	NaN	NaN	NaN	16.7269	NaN	NaN	NaN	16.3782	15.8997	NaN	NaN	NaN	NaN	15.4629	NaN	NaN	17.3946	NaN	15.3021	NaN	NaN	16.8986	ADAP1	O75689	Arf-GAP with dual PH domain-containing protein 1 OS=Homo sapiens OX=9606 GN=ADAP1 PE=1 SV=2	0	12
17.6765	17.3062	17.0936	16.4658	17.0372	16.4817	17.5494	17.6846	11.3479	NaN	18.1486	17.0249	11.3719	16.3285	17.53	18.1105	17.7618	16.0845	17.0074	16.7599	17.6138	17.5352	17.2245	17.7464	17.9511	17.6387	17.6157	17.3369	15.0853	17.8806	17.5011	16.4331	15.9411	17.1701	16.773	17.79	16.5835	16.3934	17.2844	17.0647	17.3364	16.2684	16.7083	15.5436	17.8246	AGAP1	Q9UPQ3	Arf-GAP with GTPase, ANK repeat and PH domain-containing protein 1 OS=Homo sapiens OX=9606 GN=AGAP1 PE=1 SV=4	4	40
19.3087	18.5631	18.9894	18.1642	18.4431	19.1847	19.3935	18.9866	19.1252	19.0676	18.8692	18.776	19.0333	18.7433	19.0697	19.7758	18.9626	18.8326	19.1153	19.241	19.0631	19.2085	19.2394	19.21	19.2988	19.2301	18.9471	17.891	18.7143	19.5243	19.503	18.583	18.5963	18.9147	19.0477	19.1189	18.6178	18.4989	19.4712	18.7402	19.8559	19.7546	18.8074	17.4833	19.2422	AGAP3	Q96P47	Arf-GAP with GTPase, ANK repeat and PH domain-containing protein 3 OS=Homo sapiens OX=9606 GN=AGAP3 PE=1 SV=2	4	41
22.6598	23.3451	23.6291	22.9621	22.8075	23.1055	23.2093	23.3649	23.2332	23.601	23.3615	23.9571	23.1212	23.0489	23.5262	23.2641	23.4733	23.1468	23.1131	23.03	23.6083	23.2261	23.3981	23.5636	23.7852	23.4889	23.3749	23.2242	23.4621	23.4643	23.4113	23.3494	23.4796	23.6886	23.4016	23.362	23.4177	22.9381	23.2208	23.3381	23.1922	23.1808	23.4502	22.065	23.3973	ARAP1	Q96P48	Arf-GAP with Rho-GAP domain, ANK repeat and PH domain-containing protein 1 OS=Homo sapiens OX=9606 GN=ARAP1 PE=1 SV=3	4	41
18.5058	17.6739	18.4452	17.8085	17.5814	18.9853	19.1301	18.893	18.2009	18.605	18.7866	18.2759	19.0159	18.6192	18.0389	18.4213	18.454	18.6606	18.042	18.0112	18.0897	18.3331	17.6882	18.5379	18.2295	18.4248	18.582	19.198	18.1979	19.0653	18.5331	19.1114	18.2752	18.51	18.1735	17.8664	18.1415	17.8066	18.9589	18.5315	18.8242	18.2662	18.6584	16.3492	18.1366	ARAP3	Q8WWN8	Arf-GAP with Rho-GAP domain, ANK repeat and PH domain-containing protein 3 OS=Homo sapiens OX=9606 GN=ARAP3 PE=1 SV=1	4	41
23.3455	23.3384	23.4885	23.1973	23.2811	23.2263	23.234	23.174	23.2994	22.9389	23.2728	23.2902	23.1813	23.2029	23.1612	23.1639	23.3914	23.2229	23.3746	23.1859	23.4171	23.3087	23.5457	23.3928	23.2361	23.0336	23.2353	23.0497	23.2523	23.4137	23.267	23.2221	23.2747	23.3512	23.2935	23.0952	23.2828	23.1367	23.219	23.1512	23.1393	23.1729	23.3827	21.9006	23.1444	ASAP1	Q9ULH1	Arf-GAP with SH3 domain, ANK repeat and PH domain-containing protein 1 OS=Homo sapiens OX=9606 GN=ASAP1 PE=1 SV=4	4	41
21.8967	22.0171	22.0041	22.2053	22.2506	22.3412	22.2072	22.3597	21.8645	21.489	21.759	22.2863	22.2993	22.3815	21.6764	22.2597	22.5107	22.4811	22.0798	22.2651	22.7737	22.0616	21.6991	22.3165	22.5601	21.3129	21.4898	22.3924	22.3173	22.0967	22.0915	22.082	21.8821	21.6242	22.573	21.486	22.3887	21.394	22.3838	21.9813	21.9753	21.5952	21.6139	21.2667	22.4494	ASAP2	O43150	Arf-GAP with SH3 domain, ANK repeat and PH domain-containing protein 2 OS=Homo sapiens OX=9606 GN=ASAP2 PE=1 SV=3	4	41
NaN	NaN	17.5656	17.0767	18.0893	18.1956	19.2896	19.2329	17.7949	16.9472	19.838	NaN	NaN	17.911	17.7262	17.9125	18.1618	18.4465	18.3974	18.2398	18.2199	17.5177	17.9056	19.4659	NaN	NaN	NaN	17.9742	17.9259	20.0392	17.8807	17.8454	18.1035	NaN	17.6585	18.265	17.7695	17.9307	17.9855	17.6967	19.3437	17.4985	17.7537	NaN	18.2046	ASAP3	Q8TDY4	Arf-GAP with SH3 domain, ANK repeat and PH domain-containing protein 3 OS=Homo sapiens OX=9606 GN=ASAP3 PE=1 SV=1	2	34
19.5943	NaN	17.2158	NaN	17.9943	18.3046	17.3974	17.6762	17.2502	19.7387	18.0637	17.9029	18.0817	NaN	18.5586	18.5008	NaN	NaN	18.3598	NaN	18.422	NaN	18.8343	17.7543	19.4434	20.2503	NaN	17.8243	17.8636	17.1854	17.6854	17.7491	20.0966	NaN	18.1658	20.8456	18.925	18.1639	17.0517	19.4069	17.7847	18.5601	18.5469	23.7374	17.716	ARG1	P05089	Arginase-1 OS=Homo sapiens OX=9606 GN=ARG1 PE=1 SV=2	2	34
22.1607	22.4173	22.1205	22.1386	22.1173	22.1591	22.2909	22.6613	22.3616	22.0637	22.5362	22.1409	22.6184	22.142	22.1174	22.2862	22.218	22.3558	22.3556	22.0078	22.2673	22.0257	22.3028	22.1424	22.0154	22.3507	21.7772	22.3229	22.0283	22.3419	22.2436	21.7098	22.0884	22.3458	22.2119	22.2588	22.3265	22.2334	22.1611	22.1862	22.2647	22.3251	21.9642	21.5389	22.4344	ARGLU1	Q9NWB6	Arginine and glutamate-rich protein 1 OS=Homo sapiens OX=9606 GN=ARGLU1 PE=1 SV=1	4	41
20.6136	20.8546	20.6922	20.1705	21.2459	20.9956	21.0694	21.1228	20.8358	22.0311	20.9543	20.9872	20.9519	20.7954	18.9278	21.1323	20.906	21.0121	20.3923	20.0646	20.9949	20.5921	20.8156	19.8612	21.0909	21.5547	20.604	20.7541	20.828	20.8817	20.2885	20.5797	21.0967	20.897	20.8702	20.6229	20.3478	19.725	20.2778	20.7972	21.0149	21.3128	20.753	21.5588	20.4264	NDUFAF5	Q5TEU4	Arginine-hydroxylase NDUFAF5, mitochondrial OS=Homo sapiens OX=9606 GN=NDUFAF5 PE=1 SV=1	4	41
27.7917	27.8677	28.0471	27.7986	27.7851	27.7733	27.7811	27.7477	27.7831	27.6784	27.9022	27.8193	27.6216	27.6905	27.843	27.8243	27.8365	27.7764	27.8046	27.7739	27.9413	27.9673	27.9597	27.9035	27.9487	27.7902	28.032	27.7289	27.9307	27.9532	27.8292	27.8549	27.8789	27.9815	27.9772	27.8911	27.954	27.8645	27.8845	27.9108	28.0124	27.9557	27.8845	27.2736	27.8031	RARS1	P54136	Arginine--tRNA ligase, cytoplasmic OS=Homo sapiens OX=9606 GN=RARS1 PE=1 SV=2	4	41
26.2935	26.2481	26.2524	26.4408	26.28	26.3036	26.3225	26.1837	26.1947	25.8674	26.2108	26.0974	26.1299	26.2946	26.136	26.1519	26.3215	26.2947	26.1356	26.4929	26.3991	26.3727	26.1303	26.3525	26.1899	26.285	26.6025	26.2665	26.5245	26.5068	26.3084	26.4331	26.3954	26.2996	26.5307	26.1425	26.21	26.4137	26.2193	26.2846	26.134	26.2834	26.1717	25.5914	26.2652	ASL	P04424	Argininosuccinate lyase OS=Homo sapiens OX=9606 GN=ASL PE=1 SV=4	4	41
27.2749	27.0171	26.7942	27.26	26.6554	26.8572	26.4597	26.7505	26.984	26.6763	26.9856	26.812	26.932	27.0869	25.3511	26.983	26.9574	27.1298	27.1925	25.0989	27.0259	27.2537	27.057	26.7409	26.5291	26.5598	25.9764	27.3056	26.864	26.7092	27.1548	27.3928	25.0362	26.9781	26.9269	27.3154	27.157	27.4687	27.2967	27.1959	27.4043	27.5345	27.2331	26.7986	27.1637	ASS1	P00966	Argininosuccinate synthase OS=Homo sapiens OX=9606 GN=ASS1 PE=1 SV=2	4	41
16.3499	17.0199	16.5119	16.2406	16.6897	NaN	NaN	16.3467	NaN	16.2755	NaN	NaN	15.6978	NaN	17.1991	NaN	NaN	15.8908	16.5533	15.9394	NaN	16.5995	17.3898	17.0323	17.4139	NaN	NaN	16.128	NaN	15.0221	NaN	NaN	NaN	NaN	NaN	NaN	15.7456	NaN	NaN	NaN	NaN	NaN	NaN	NaN	NaN	ARL14EP	Q8N8R7	ARL14 effector protein OS=Homo sapiens OX=9606 GN=ARL14EP PE=1 SV=1	4	15
18.0892	18.7202	18.7763	18.47	18.071	18.4928	16.4145	18.2187	18.8551	17.699	18.1049	17.2945	18.4235	18.0445	18.4475	18.5908	17.9797	18.525	18.6624	18.6937	18.6965	18.5195	18.815	18.3506	18.921	NaN	NaN	18.9137	18.4688	19.1159	17.4849	18.7897	18.5056	18.029	18.5736	18.2562	18.4994	18.7179	18.3472	18.8406	18.2766	17.993	18.7652	15.713	18.0201	ARVCF	O00192	Armadillo repeat protein deleted in velo-cardio-facial syndrome OS=Homo sapiens OX=9606 GN=ARVCF PE=1 SV=1	4	39
22.6182	22.5688	22.6942	22.0608	22.3401	22.0697	22.0997	22.1005	22.0249	22.7408	22.2252	22.0453	22.0548	21.6766	22.5737	22.2756	22.5333	22.2492	22.4365	22.3406	22.5643	22.4086	22.5463	22.7497	22.4071	22.9817	22.4783	22.1584	22.4544	22.0986	22.6544	22.7762	22.2114	22.465	22.3139	22.8681	22.4797	21.7836	22.2263	22.6244	22.3866	22.527	22.692	22.085	22.3801	ARMC1	Q9NVT9	Armadillo repeat-containing protein 1 OS=Homo sapiens OX=9606 GN=ARMC1 PE=1 SV=1	4	41
18.5992	16.5959	19	20.6884	18.9202	17.9943	19.054	18.3554	19.3615	17.5134	19.1408	17.7875	18.759	18.5046	19.4438	18.8981	18.9303	18.7898	19.5006	18.6791	19.2043	18.7438	18.9373	18.1058	NaN	17.4339	18.3457	18.3986	18.3913	18.3361	18.3545	18.7242	19.3945	19.1475	18.8783	15.7193	18.7794	19.1112	19.6427	19.7288	18.5438	18.9289	19.1362	17.1386	17.1118	ARMC5	Q96C12	Armadillo repeat-containing protein 5 OS=Homo sapiens OX=9606 GN=ARMC5 PE=1 SV=2	4	40
23.1179	23.0623	23.0387	23.1385	23.0239	23.2395	22.5444	22.9806	22.9487	22.974	23.1361	22.6859	22.9248	22.7713	22.9408	22.6674	23.0241	23.0793	23.1649	23.1349	22.8304	23.0937	22.8992	22.9809	23.0896	22.423	23.085	22.9033	23.1143	22.9118	22.9539	22.9104	23.1886	23.0261	23.0027	23.151	22.7559	23.0309	22.9773	22.8366	23.043	23.209	23.0886	22.1673	22.5944	ARMC6	Q6NXE6	Armadillo repeat-containing protein 6 OS=Homo sapiens OX=9606 GN=ARMC6 PE=1 SV=2	4	41
21.029	20.3457	20.482	20.122	21.705	20.5534	20.4698	21.5951	20.373	21.2581	20.9979	21.475	21.3915	20.4135	21.3771	20.9558	20.7266	21.3694	20.8523	20.8175	20.7452	21.1383	20.3134	21.2279	20.9029	20.4273	21.1212	20.5965	21.0246	21.1655	20.4636	20.5569	21.1951	20.8651	20.5756	20.4196	21.5141	20.2325	21.6802	21.7186	21.878	21.7379	21.3555	16.8668	19.7648	ARMC8	Q8IUR7	Armadillo repeat-containing protein 8 OS=Homo sapiens OX=9606 GN=ARMC8 PE=1 SV=2	4	41
24.7064	24.966	25.0313	25.0963	24.3584	24.512	24.7453	24.4541	24.4961	24.7367	24.5082	24.3217	24.3874	24.5911	24.473	24.9123	24.7825	24.5996	24.7263	24.9331	24.7811	24.7888	25.0565	24.6604	24.6314	24.7913	24.9156	24.6628	24.9514	24.5628	24.9044	24.9291	24.7723	25.1245	24.9362	25.3634	24.7507	25.2027	25.1305	25.064	25.4859	25.3877	25.0814	24.4588	25.0235	ARMCX1	Q9P291	Armadillo repeat-containing X-linked protein 1 OS=Homo sapiens OX=9606 GN=ARMCX1 PE=1 SV=1	4	41
22.0885	22.7518	22.4711	22.3499	21.9517	22.8156	22.7509	22.5923	22.731	22.6859	22.3986	22.4744	22.1705	22.3353	22.1614	22.4593	22.6519	22.1523	22.6768	22.4291	22.5667	22.5597	22.5463	22.8245	22.5187	22.7778	22.414	22.8962	22.8257	22.5885	22.8603	22.1947	21.7844	22.508	22.5679	22.8131	22.2833	22.4849	22.137	22.5538	22.5726	22.8321	22.5104	21.5672	22.3154	ARMCX2	Q7L311	Armadillo repeat-containing X-linked protein 2 OS=Homo sapiens OX=9606 GN=ARMCX2 PE=2 SV=1	4	41
24.0123	23.6569	24.09	23.7176	23.6442	23.855	23.6906	23.571	23.5188	24.4005	23.5986	23.8994	23.6086	23.7489	23.7265	24.1855	23.7435	23.8652	23.6241	23.8603	23.8104	23.9895	23.7092	23.7336	23.9199	24.7277	24.1897	23.879	23.6994	23.869	23.6866	23.7398	23.7978	23.9001	23.6816	24.1339	24.0001	23.806	23.545	23.7449	24.3594	24.1551	23.8139	23.5407	23.7523	ARMCX3	Q9UH62	Armadillo repeat-containing X-linked protein 3 OS=Homo sapiens OX=9606 GN=ARMCX3 PE=1 SV=1	4	41
20.026	20.319	20.813	20.0543	22.3993	20.9845	20.8275	20.9943	20.7582	20.6066	20.4477	20.8506	22.1035	20.642	21.105	22.2408	20.6905	20.6591	20.2657	20.8577	20.3708	22.2383	20.3911	22.0913	20.7218	20.858	21.0082	20.6988	20.6398	20.7812	20.407	20.297	19.853	20.5542	20.6062	20.2604	20.9662	20.5687	20.2119	20.5658	19.2234	21.1013	20.3983	19.4318	20.2671	ARMH3	Q5T2E6	Armadillo-like helical domain-containing protein 3 OS=Homo sapiens OX=9606 GN=ARMH3 PE=1 SV=1	4	41
21.5198	21.4743	21.3773	21.431	21.0652	21.5434	21.1725	21.2077	21.5993	20.7563	21.2559	20.7905	21.2187	21.2738	21.0297	21.4042	21.2563	21.2	21.4093	21.4701	21.5182	21.442	21.5571	21.3628	21.6889	21.4687	21.4635	21.5984	21.5477	21.7794	21.5682	21.742	21.3366	21.4363	21.6093	21.4208	21.3431	21.6129	21.5749	21.5034	21.4329	21.3117	21.2892	19.9505	21.7504	ARPIN	Q7Z6K5	Arpin OS=Homo sapiens OX=9606 GN=ARPIN PE=1 SV=1	4	41
18.379	18.4848	17.8885	17.8754	19.2778	18.1406	17.9218	18.2825	17.8998	17.8733	19.1237	19.4573	17.7837	18.646	19.7986	18.3192	18.4556	18.8997	18.8982	18.1277	NaN	18.6194	18.0819	18.4117	18.1113	18.4815	17.9583	18.3204	18.446	17.5523	18.2998	17.9447	18.4039	18.9439	17.8723	17.7162	18.2695	17.932	17.8359	18.6207	18.1166	17.9814	18.1076	17.6987	18.0775	ARRDC1	Q8N5I2	Arrestin domain-containing protein 1 OS=Homo sapiens OX=9606 GN=ARRDC1 PE=1 SV=1	4	40
17.2274	17.1314	17.2787	16.5979	17.692	16.8681	17.2965	17.5191	17.6951	17.2162	17.0669	17.4347	18.0767	17.3938	17.8538	18.1642	17.8278	17.5094	17.3969	17.8103	17.8216	17.2625	17.4206	17.2205	17.015	17.5855	16.2382	16.4852	16.9961	17.8598	16.8976	17.1078	17.7039	16.7199	17.0086	17.6111	16.8214	17.0538	18.1409	17.195	17.994	17.3734	16.8226	16.9674	16.8416	ARRDC3	Q96B67	Arrestin domain-containing protein 3 OS=Homo sapiens OX=9606 GN=ARRDC3 PE=1 SV=1	4	41
20.8634	21.2914	21.2545	20.9992	21.002	20.8316	20.896	19.8416	20.4804	20.2421	19.1522	20.8827	19.9496	20.244	20.377	19.251	19.3377	21.2424	18.8111	20.0221	19.0202	20.7796	19.4627	19.3915	20.2804	20.353	21.4266	19.1333	20.0516	19.6913	19.598	19.1577	19.3146	20.8009	18.7819	19.3368	20.1187	20.163	20.8643	19.8042	20.3994	19.2742	20.2213	18.1139	19.2883	CDR2L	Q86X02	Cerebellar degeneration-related protein 2-like OS=Homo sapiens OX=9606 GN=CDR2L PE=1 SV=2	4	41
17.6548	18.5721	17.3586	17.096	NaN	16.6281	17.4818	18.5045	17.9075	16.5571	18.4384	17.236	17.2201	17.3552	NaN	17.3347	17.3349	17.5595	17.0796	17.1241	17.6126	17.3083	17.5389	17.6798	17.2757	18.0434	17.387	17.0469	17.3713	18.4284	17.3434	18.1751	17.7589	16.8092	18.2127	17.4271	17.0348	18.309	16.7464	18.2426	16.759	NaN	17.285	NaN	18.082	AS3MT	Q9HBK9	Arsenite methyltransferase OS=Homo sapiens OX=9606 GN=AS3MT PE=1 SV=3	4	37
20.0688	19.1611	18.7318	17.8812	18.8868	18.7767	18.2403	19.3262	18.896	16.5473	18.9414	20.1671	19.7003	18.1816	20.1517	18.6422	17.7167	19.2937	19.1953	19.1918	19.7915	18.311	19.6626	19.3895	19.164	18.1489	19.2934	18.8949	19.1945	19.6791	19.3234	19.5889	NaN	19.7824	20.2727	17.9669	19.755	19.458	20.1949	19.2095	19.1255	19.3947	20.1909	17.2051	18.8199	ARNT	P27540	Aryl hydrocarbon receptor nuclear translocator OS=Homo sapiens OX=9606 GN=ARNT PE=1 SV=1	4	40
16.9369	17.1473	17.3195	NaN	18.1854	17.7376	18.0542	17.6104	17.0819	19.2387	18.1211	18.0069	17.2796	17.6271	17.9309	15.9321	16.5727	17.0432	17.2701	16.9421	16.5379	17.2023	17.8647	17.9329	17.7185	17.0304	19.4442	17.6109	17.4334	17.9631	17.8359	17.5096	16.7232	17.9225	18.0036	16.5021	17.4063	17.0679	17.2424	17.3209	16.7573	17.2263	18.2962	16.3434	18.2033	AHR	P35869	Aryl hydrocarbon receptor OS=Homo sapiens OX=9606 GN=AHR PE=1 SV=2	3	41
21.9397	22.0631	22.0657	21.7972	21.6678	22.065	21.7442	21.9199	22.2813	21.7311	22.0088	21.5821	22.1623	22.0185	22.0248	21.9744	22.1962	21.8809	21.9639	22.0744	22.108	22.2743	22.1978	22.1025	21.5748	21.8721	21.8818	21.9082	22.1629	22.2626	22.1583	21.9123	22.1152	22.2283	22.0397	22.1817	21.7466	21.751	22.3255	22.3342	22.2959	22.0808	22.0021	20.9781	22.1481	NAT1	P18440	Arylamine N-acetyltransferase 1 OS=Homo sapiens OX=9606 GN=NAT1 PE=1 SV=2	4	41
22.3916	22.5641	22.3343	22.4509	21.957	22.4693	22.6039	22.2164	22.2623	22.6259	22.6043	22.4026	22.4044	22.2734	22.0495	22.5183	22.5189	22.2976	22.5576	22.3616	22.4677	22.2686	22.1752	22.4675	22.2781	22.676	22.4608	21.9966	22.4427	22.5085	22.4026	22.4396	22.0156	22.652	22.4748	22.5734	22.3482	22.4262	22.4218	22.3278	22.7773	22.7033	22.0752	21.424	22.5193	ARSA	P15289	Arylsulfatase A OS=Homo sapiens OX=9606 GN=ARSA PE=1 SV=3	4	41
25.0762	25.5728	25.0476	25.2221	24.8354	25.1333	25.1674	24.7472	25.3019	25.4266	25.467	24.9767	24.8685	25.1986	25.1614	25.1675	25.5681	25.2988	25.3378	25.5277	25.3509	25.373	25.6229	25.2539	25.1095	24.9531	25.5097	25.4148	25.3431	25.0818	25.4287	25.1381	25.7834	25.5113	25.6445	25.6182	25.2728	25.7053	25.7944	25.3457	25.5357	25.2543	25.6478	24.8745	25.1266	ARSB	P15848	Arylsulfatase B OS=Homo sapiens OX=9606 GN=ARSB PE=1 SV=1	4	41
17.0848	17.7808	17.7169	17.8264	17.2368	17.6535	16.9373	16.5987	17.2881	21.3297	18.1436	20.0545	18.0162	17.7597	18.6755	18.0608	17.4104	18.7321	18.842	17.5498	17.7454	18.7124	17.1994	18.5391	17.9868	19.6676	18.9869	18.3663	17.8658	17.4518	18.5963	18.011	17.1923	18.811	18.2889	18.0764	17.6685	18.3679	17.9166	18.5795	20.0173	20.6599	17.468	20.0588	18.0246	ARSD	P51689	Arylsulfatase D OS=Homo sapiens OX=9606 GN=ARSD PE=1 SV=2	4	41
17.5323	18.2386	18.0638	17.809	17.3287	17.4673	17.0242	17.0963	17.2416	17.3978	17.0689	17.3628	17.3234	17.6382	17.6231	17.6765	17.5335	17.4972	17.9535	17.6855	17.9522	18.7365	18.5724	17.7534	17.3927	18.1231	17.3117	18.2012	17.7513	17.6053	17.7654	17.6376	17.9321	17.384	18.2316	18.1221	17.7013	17.8152	17.7669	18.2434	18.1349	17.8714	NaN	17.801	17.9122	ARSK	Q6UWY0	Arylsulfatase K OS=Homo sapiens OX=9606 GN=ARSK PE=1 SV=1	4	40
18.8413	19.7779	19.3022	18.5309	NaN	17.323	19.1002	18.8366	18.2404	18.3571	18.2043	18.2467	19.6599	NaN	19.2441	18.4394	18.3403	19.1059	18.9317	18.0585	18.9982	18.7443	19.2687	19.6348	19.5141	20.1158	NaN	19.4681	18.4939	18.1752	18.6494	19.197	18.3563	19.4037	19.1787	20.2899	NaN	19.3455	19.0877	19.2975	19.1876	19.2108	18.2361	NaN	17.6635	ARSL	P51690	Arylsulfatase L OS=Homo sapiens OX=9606 GN=ARSL PE=1 SV=2	4	36
14.9909	19.1608	15.3028	18.3387	18.2326	19.0398	20.0163	19.3065	19.1199	15.3494	18.8402	19.4593	20.1848	19.6974	19.3814	18.2325	20.1116	NaN	18.7761	14.7887	19.4287	18.6094	18.7558	NaN	15.8724	18.3629	18.546	15.4165	18.0193	18.8552	19.4466	18.6034	19.8894	16.2034	19.343	17.028	18.945	18.1211	18.8997	18.8604	17.1023	18.7232	19.2776	15.6599	19.4865	CSNK1G1	Q9HCP0	Casein kinase I isoform gamma-1 OS=Homo sapiens OX=9606 GN=CSNK1G1 PE=1 SV=1	4	39
20.6014	NaN	NaN	18.857	NaN	20.1463	20.1242	20.426	20.1037	20.3835	20.8852	20.111	20.2693	NaN	NaN	NaN	20.1807	NaN	NaN	19.8513	NaN	20.6512	20.4505	NaN	NaN	NaN	20.8154	NaN	20.0958	20.8466	20.3588	20.3807	NaN	NaN	NaN	NaN	NaN	20.4363	NaN	20.4943	20.2706	NaN	20.6534	19.0125	19.9592	ASDURF	L0R819	ASNSD1 upstream open reading frame protein OS=Homo sapiens OX=9606 GN=ASDURF PE=1 SV=1	2	23
25.8878	26.0545	25.9098	25.8393	25.7469	25.4268	25.2459	25.9498	25.9997	23.9119	25.0902	25.5073	25.6128	25.5093	25.0804	25.1461	25.8151	26.0671	25.82	25.7906	25.7675	25.9325	25.9974	25.7558	25.8571	23.6065	24.5223	25.7265	25.8785	25.6541	25.1468	25.3839	25.9331	25.5115	25.8197	24.4543	25.3203	25.6664	25.6905	25.8077	24.6467	24.2882	25.6703	22.1974	25.199	ASNS	P08243	Asparagine synthetase [glutamine-hydrolyzing] OS=Homo sapiens OX=9606 GN=ASNS PE=1 SV=4	4	41
27.6612	27.707	27.7465	27.5064	27.5694	27.4528	27.5346	27.5564	27.6656	27.2922	27.5411	27.6332	27.6058	27.468	27.6015	27.6046	27.6392	27.7006	27.6785	27.697	27.6739	27.6921	27.7632	27.7856	27.743	27.366	27.5565	27.5587	27.712	27.8023	27.5841	27.7138	27.6645	27.6843	27.7903	27.5657	27.6915	27.5987	27.7668	27.7394	27.7423	27.5967	27.631	26.6789	27.6647	NARS1	O43776	Asparagine--tRNA ligase, cytoplasmic OS=Homo sapiens OX=9606 GN=NARS1 PE=1 SV=1	4	41
26.945	27.0137	26.9854	26.7456	26.86	26.6103	26.7925	26.8894	27.0692	26.0755	26.761	26.6993	26.7678	26.7808	26.7719	26.9196	26.9797	26.9663	26.9551	26.9488	27.0336	27.0547	27.0282	26.9543	26.9783	26.3665	26.668	26.8734	27.0216	27.0507	26.6292	26.8843	26.941	26.7721	27.1147	26.8152	26.8303	26.9491	26.9859	26.8358	26.8278	26.6036	26.8496	25.5101	26.7519	GOT1	P17174	Aspartate aminotransferase, cytoplasmic OS=Homo sapiens OX=9606 GN=GOT1 PE=1 SV=3	4	41
27.4952	27.3179	27.4104	27.4374	27.4115	27.5534	27.3859	27.3759	27.387	28.325	27.579	27.723	27.4619	27.2596	27.6471	27.6992	27.4749	27.4109	27.3584	27.2199	27.3532	27.4598	27.346	27.3554	27.5818	28.0811	27.2458	27.4412	27.439	27.3347	27.4739	27.4323	27.4223	27.4857	27.3653	27.8112	27.3507	27.3339	27.3769	27.6057	27.6219	27.817	27.2686	28.5653	27.3017	GOT2	P00505	Aspartate aminotransferase, mitochondrial OS=Homo sapiens OX=9606 GN=GOT2 PE=1 SV=3	4	41
28.2647	28.2457	28.1791	28.3724	28.5744	28.2403	28.2034	28.3338	28.3672	28.3621	28.4071	28.3623	28.2465	28.3555	28.4521	28.2156	28.347	28.3556	28.2899	28.2455	28.1871	28.2419	28.1614	28.2588	28.2982	28.2909	28.4909	28.4054	28.3919	28.2157	28.188	28.3901	28.2744	28.4052	28.3721	28.482	28.3681	28.3483	28.268	28.4482	28.4302	28.485	28.3598	28.2798	28.3753	DARS1	P14868	Aspartate--tRNA ligase, cytoplasmic OS=Homo sapiens OX=9606 GN=DARS1 PE=1 SV=2	4	41
24.0676	24.0939	24.0947	23.7301	24.6826	24.1153	23.7004	23.9499	23.7898	26.8415	24.2786	25.2279	24.3181	24.4774	25.0508	24.6183	24.1393	23.8902	24.0774	24.0119	24.0403	24.4634	23.9012	23.976	24.5357	25.3292	24.9084	24.0537	24.0636	24.2543	23.9548	24.1352	24.4218	24.4734	24.2202	24.8667	24.3348	24.1045	24.0191	24.615	24.76	25.1243	24.3278	26.1318	24.3943	DARS2	Q6PI48	Aspartate--tRNA ligase, mitochondrial OS=Homo sapiens OX=9606 GN=DARS2 PE=1 SV=1	4	41
26.8583	27.0788	27.1765	27.0296	27.2635	27.1245	27.0607	26.9926	27.0226	28.2775	26.9888	27.1213	27.2996	26.963	27.4442	27.2365	27.0373	26.8184	26.807	27.0618	26.8705	27.1459	26.9103	26.9802	27.1709	27.5365	27.0643	27.1702	27.0805	26.9763	26.951	27.0687	27.0869	26.9544	27.0733	27.4294	26.9726	27.0166	26.8771	27.0488	27.247	27.4567	26.9255	28.086	26.7676	DNPEP	Q9ULA0	Aspartyl aminopeptidase OS=Homo sapiens OX=9606 GN=DNPEP PE=1 SV=2	4	41
27.4606	27.3152	27.3815	27.3434	27.5025	27.5562	27.7296	27.3071	27.3926	27.685	27.4656	27.4585	27.3258	27.4491	27.5058	27.5941	27.4686	27.3561	27.2905	27.3866	27.5368	27.4	27.4471	27.4718	27.4507	27.9634	27.6609	27.4552	27.4245	27.4958	27.5927	27.3999	27.4495	27.4582	27.5264	27.7376	27.4232	27.5285	27.5181	27.591	27.8816	27.8135	27.4137	27.8494	27.6988	ASPH	Q12797	Aspartyl/asparaginyl beta-hydroxylase OS=Homo sapiens OX=9606 GN=ASPH PE=1 SV=3	4	41
27.1	27.0193	27.0573	26.7101	26.8356	27.0116	26.8488	26.8495	26.8859	26.1721	26.6816	26.774	26.9426	26.7891	26.9581	26.8825	26.8436	27.1389	26.975	27.0848	27.0436	27.1116	27.0217	26.9221	26.8192	26.0804	27.0336	26.9007	26.8272	27.1658	26.8484	26.8191	26.7476	26.8228	27.0552	26.6202	26.9622	26.9935	26.9903	26.9169	26.8269	26.4304	26.8684	25.2092	26.7043	PEA15	Q15121	Astrocytic phosphoprotein PEA-15 OS=Homo sapiens OX=9606 GN=PEA15 PE=1 SV=2	4	41
23.5859	24.2097	23.9841	23.6428	24.6463	24.226	24.3376	24.6117	24.4885	24.4644	24.7757	24.5202	24.2665	24.2635	24.4184	24.2695	24.6075	24.0304	24.2402	24.1296	24.0941	24.2307	24.4401	24.1618	24.371	23.876	24.4797	24.2242	24.3373	24.5661	24.229	24.0989	24.5888	24.5821	24.3586	23.9379	24.1914	24.0814	23.8925	24.1315	24.1042	24.1542	24.4235	22.2706	24.29	ATXN10	Q9UBB4	Ataxin-10 OS=Homo sapiens OX=9606 GN=ATXN10 PE=1 SV=1	4	41
21.8227	22.3081	21.3063	21.7615	21.2819	21.3771	22.3782	22.6334	21.0969	20.4968	21.1924	21.0606	21.6044	21.8415	21.9289	21.0515	22.1932	22.0167	21.0685	22.0679	21.6518	21.3987	21.6758	22.015	22.7887	20.4234	22.4947	21.7833	22.0234	22.2837	21.7035	21.0332	21.1054	21.7298	21.9704	21.3373	21.7776	22.1914	21.9109	21.6137	21.0907	21.4723	22.1817	19.2884	21.1212	ATXN2	Q99700	Ataxin-2 OS=Homo sapiens OX=9606 GN=ATXN2 PE=1 SV=2	4	41
24.1592	24.3756	24.5909	24.3184	24.1586	24.3259	24.5277	24.2045	24.3323	24.1034	24.0529	24.4247	24.0529	24.4591	24.2706	24.238	24.309	24.4198	24.3809	24.3117	24.3101	24.1384	24.5146	24.4276	24.6105	24.0746	24.5298	24.4024	24.4259	24.3867	24.5962	24.266	24.1979	24.4212	24.4011	24.1813	24.3687	24.4037	24.4315	24.4024	24.1191	24.31	24.3877	22.6348	24.486	ATXN2L	Q8WWM7	Ataxin-2-like protein OS=Homo sapiens OX=9606 GN=ATXN2L PE=1 SV=2	4	41
20.4927	20.8665	20.8525	21.0404	20.396	20.777	20.6531	20.8884	20.9682	NaN	21.5867	20.8751	20.9884	20.6858	20.8253	20.313	20.6272	20.4291	21.3488	20.6999	21.6291	21.3135	21.2419	21.8036	21.2729	18.4028	19.5367	20.0788	20.6275	20.9516	21.0283	21.1349	20.7406	20.9525	21.0413	21.4179	21.0641	21.0737	20.2372	20.8342	20.1735	20.882	20.4862	17.828	20.2795	ATXN3	P54252	Ataxin-3 OS=Homo sapiens OX=9606 GN=ATXN3 PE=1 SV=5	4	40
19.5165	NaN	20.3272	18.6084	20.556	20.6405	20.6361	20.754	20.7582	20.3974	20.7896	20.0603	20.0314	20.2881	20.0658	19.0615	NaN	20.0499	19.6695	21.163	20.0537	19.9765	20.4238	19.3126	20.2261	19.5571	19.3869	20.1257	16.3186	20.2849	20.0806	19.0772	19.0483	19.5467	20.3533	18.9948	20.1101	19.6165	20.2022	20.5869	19.1156	19.1632	19.5971	18.0229	20.1145	ATXN7L3B	Q96GX2	Ataxin-7-like protein 3B OS=Homo sapiens OX=9606 GN=ATXN7L3B PE=1 SV=2	3	40
NaN	NaN	NaN	NaN	NaN	NaN	NaN	NaN	NaN	NaN	NaN	NaN	NaN	NaN	NaN	NaN	NaN	NaN	NaN	NaN	NaN	NaN	NaN	NaN	NaN	22.0108	NaN	NaN	NaN	NaN	NaN	NaN	NaN	NaN	NaN	NaN	NaN	NaN	NaN	NaN	NaN	NaN	NaN	NaN	NaN	AHDC1	Q5TGY3	AT-hook DNA-binding motif-containing protein 1 OS=Homo sapiens OX=9606 GN=AHDC1 PE=1 SV=1	0	1
22.3763	22.6956	22.6076	22.5925	22.5658	22.5375	22.214	22.613	22.5411	22.4619	22.3989	22.5764	22.3089	22.535	22.5426	22.7295	22.6183	22.423	22.2378	22.7558	22.6484	22.6016	22.7795	22.7294	22.6437	22.7224	22.3965	22.6938	22.5731	22.5257	22.8419	22.4689	21.9599	22.4248	22.4526	22.1639	22.6263	22.3764	22.5853	22.5816	22.2136	22.817	21.8939	21.7975	22.6072	ATL1	Q8WXF7	Atlastin-1 OS=Homo sapiens OX=9606 GN=ATL1 PE=1 SV=1	4	41
18.9862	19.3292	20.5384	19.1493	19.798	19.1944	19.7444	17.8963	17.9619	19.811	18.9209	19.4941	21.1833	19.1777	20.9608	19.3191	19.0821	19.2764	19.1108	20.7316	19.1473	20.1185	19.1167	18.167	18.2613	19.7032	19.8204	19.2352	19.1537	19.5645	19.4994	19.1233	19.5563	19.4572	20.495	20.6757	19.1507	19.4056	19.6026	19.2812	19.8538	20.1508	19.341	19.4703	18.4995	ATL2	Q8NHH9	Atlastin-2 OS=Homo sapiens OX=9606 GN=ATL2 PE=1 SV=2	4	41
27.0749	27.1641	27.3891	27.1136	27.2449	27.2608	27.3068	27.2547	27.0945	27.4366	27.1135	27.2608	27.0954	27.1601	27.3111	27.2617	27.1726	27.264	27.1493	27.3416	27.3429	27.3206	27.2109	27.4423	27.3686	27.1612	27.3449	27.2555	27.2974	27.3713	27.3746	27.2758	27.3397	27.4828	27.4275	27.3392	27.3574	27.2649	27.3278	27.3395	27.5351	27.3593	27.4142	26.6693	27.4551	ATL3	Q6DD88	Atlastin-3 OS=Homo sapiens OX=9606 GN=ATL3 PE=1 SV=1	4	41
26.9464	26.6592	26.6101	27.0063	26.8306	27.073	26.9443	26.7912	26.6835	28.7902	26.8387	27.2875	27.0241	26.7079	27.5371	27.2189	26.7711	26.7531	26.752	26.785	26.8287	26.9974	26.3706	26.893	27.0491	28.2001	26.6077	27.1183	26.9213	26.7798	27.0659	26.962	26.756	26.6429	26.786	27.5772	26.924	26.7884	26.6406	27.1506	27.2557	27.7021	26.6391	28.5307	26.8835	ATP5PB	P24539	ATP synthase F(0) complex subunit B1, mitochondrial OS=Homo sapiens OX=9606 GN=ATP5PB PE=1 SV=2	4	41
21.2704	21.3658	20.8715	21.9294	21.7012	21.0636	21.3221	20.385	21.1219	23.4603	20.392	21.6955	21.203	21.5866	22.0664	22.0633	21.2089	21.1669	21.0245	21.7945	21.8394	21.3371	20.6576	21.6274	21.6699	23.0051	21.874	22.0241	21.6289	21.4485	21.9873	21.647	21.562	21.6453	21.2235	22.4213	21.4446	21.4206	21.3139	21.9777	21.9621	22.5847	21.8447	23.7135	21.0952	ATP5MK	Q96IX5	ATP synthase membrane subunit K, mitochondrial OS=Homo sapiens OX=9606 GN=ATP5MK PE=1 SV=1	4	41
19.1654	19.2326	20.1107	19.0482	19.4812	18.6808	19.4252	19.4692	19.2809	21.0235	18.8113	19.4514	18.707	19.2705	19.7918	19.6934	19.5634	19.2168	19.4733	19.258	18.9024	19.6714	19.607	20.0167	20.0564	19.5633	19.4179	19.206	19.4866	19.4235	19.4022	19.3738	19.4779	19.7864	18.9927	19.4977	19.3035	19.2052	19.3716	19.6555	19.287	19.794	NaN	19.3749	NaN	ATPAF1	Q5TC12	ATP synthase mitochondrial F1 complex assembly factor 1 OS=Homo sapiens OX=9606 GN=ATPAF1 PE=1 SV=1	4	39
22.1732	21.8162	21.9007	21.8966	22.3706	21.6768	21.9241	21.5924	21.7718	23.8498	22.3106	22.4117	22.1239	22.2284	22.7556	22.3203	22.2088	21.7525	22.0889	22.0965	21.9481	22.0561	21.8335	22.2461	22.359	23.0933	22.4957	22.0589	22.3602	22.085	22.0908	22.1516	22.6181	22.2066	22.1723	22.9773	22.3955	22.1941	22.2954	22.8856	22.8998	23.1481	22.2263	23.4874	22.3238	ATPAF2	Q8N5M1	ATP synthase mitochondrial F1 complex assembly factor 2 OS=Homo sapiens OX=9606 GN=ATPAF2 PE=1 SV=1	4	41
19.9596	20.1563	20.2995	20.3453	20.4923	20.09	19.7025	19.6205	19.576	22.4212	19.7316	20.7817	19.9162	20.7267	21.548	20.983	20.3772	20.1701	19.9738	20.4274	20.2826	20.79	20.0854	20.1652	20.751	21.7195	20.2257	20.5833	20.2364	20.2784	20.5485	20.2449	20.3596	20.4473	20.0812	21.2531	20.7255	20.3517	19.9645	20.7636	20.8385	21.2924	20.7418	22.3748	19.3302	MT-ATP6	P00846	ATP synthase subunit a OS=Homo sapiens OX=9606 GN=MT-ATP6 PE=1 SV=1	4	41
29.9795	30.0556	29.9743	30.038	30.2243	30.1317	29.9854	29.9741	29.9928	31.8686	30.1376	30.5541	30.2172	30.1886	30.8073	30.4918	30.1614	30.0536	30.1137	30.0556	30.0249	30.0831	29.9374	30.0812	30.1657	30.9337	29.8899	30.1102	30.0495	30.0503	30.159	29.9773	30.2622	30.2474	30.0024	30.6076	30.0426	30.023	30.0579	30.4382	30.4552	30.729	30.2075	31.2327	29.9548	ATP5F1A	P25705	ATP synthase subunit alpha, mitochondrial OS=Homo sapiens OX=9606 GN=ATP5F1A PE=1 SV=1	4	41
23.7629	23.3099	23.3513	23.5016	23.5644	23.977	23.5751	23.3804	23.1977	25.065	23.0162	23.4407	23.2681	23.4816	23.6798	24.1792	23.7826	22.7506	22.7482	23.7961	23.6934	23.5647	23.7695	23.3452	24.0922	24.3215	23.4503	23.9163	23.6126	23.6928	23.8659	23.6639	23.6512	23.4002	23.5188	23.9727	22.6359	23.6295	23.2659	23.3631	24.0268	24.1989	22.9067	24.3308	23.1498	ATP5MJ	P56378	ATP synthase subunit ATP5MJ, mitochondrial OS=Homo sapiens OX=9606 GN=ATP5MJ PE=1 SV=1	4	41
30.2362	30.2109	30.3613	30.3017	30.5256	30.4442	30.2262	30.2035	30.1399	32.0224	30.3267	30.8367	30.4871	30.4681	31.0121	30.7709	30.3773	30.2978	30.311	30.3779	30.2987	30.3925	30.2812	30.2434	30.4418	31.2559	30.1839	30.4168	30.157	30.3398	30.4602	30.2787	30.3042	30.4491	30.2547	30.9678	30.3718	30.2427	30.2679	30.7157	30.9248	31.0505	30.434	31.4928	30.2959	ATP5F1B	P06576	ATP synthase subunit beta, mitochondrial OS=Homo sapiens OX=9606 GN=ATP5F1B PE=1 SV=3	4	41
26.5855	26.6125	26.6011	26.7142	26.9527	26.8545	26.6202	26.5753	26.7039	28.7412	26.7241	26.9983	27.0836	26.8448	27.3717	27.0665	26.7608	26.6781	26.5992	26.87	26.6907	26.659	26.7185	26.5295	26.7471	27.5441	26.6666	27.0669	26.7396	27.0081	26.879	26.778	26.9276	27.0237	26.7409	27.3547	26.7386	26.7357	26.8065	27.0611	27.3257	27.4552	26.8565	28.1684	26.6799	ATP5PD	O75947	ATP synthase subunit d, mitochondrial OS=Homo sapiens OX=9606 GN=ATP5PD PE=1 SV=3	4	41
25.3933	25.4196	25.4184	25.5023	25.7832	25.6874	25.6559	25.6293	25.6233	27.3042	25.7498	26.1361	25.9805	25.689	26.3116	25.9737	25.6291	25.504	25.5764	25.6913	25.5396	25.4945	25.3778	25.3424	25.404	26.1439	25.6066	25.7583	25.6447	25.8001	25.6963	25.4797	25.816	25.6601	25.4629	25.8843	25.4341	25.4672	25.714	25.7956	25.9017	26.0557	25.582	26.4477	25.6871	ATP5F1D	P30049	ATP synthase subunit delta, mitochondrial OS=Homo sapiens OX=9606 GN=ATP5F1D PE=1 SV=2	4	41
24.9025	25.0126	24.8882	25.1834	25.1033	25.0809	24.7451	24.5583	24.4856	26.25	24.4903	25.2581	25.0871	25.0511	25.5962	25.4247	25.174	24.7733	24.9209	25.0606	25.0986	25.0933	24.973	25.2313	25.2413	25.8768	25.0467	25.404	25.0991	25.0544	25.3402	25.2164	25.2283	25.1195	25.0058	25.6453	24.9894	25.3015	25.0434	25.2791	25.3482	25.7213	25.091	26.1226	24.6613	ATP5ME	P56385	ATP synthase subunit e, mitochondrial OS=Homo sapiens OX=9606 GN=ATP5ME PE=1 SV=2	4	41
24.9056	24.9532	24.7213	25.2119	25.3309	25.1405	24.815	24.8806	24.8352	26.5713	24.3041	25.1529	25.01	24.8567	25.4537	25.1491	25.0071	24.596	24.7534	24.9072	24.9428	24.943	24.9831	24.8911	25.0076	25.7714	25.1409	25.4352	25.0706	24.4786	24.7679	25.0951	24.9559	25.0136	24.4768	25.226	24.8361	24.9114	24.8086	25.2006	25.1667	25.5308	24.8897	26.1628	24.7454	ATP5F1EP2	Q5VTU8	ATP synthase subunit epsilon-like protein, mitochondrial OS=Homo sapiens OX=9606 GN=ATP5F1EP2 PE=1 SV=1	4	41
22.686	22.3542	22.4462	22.8511	22.8857	22.9927	22.7946	22.6152	22.5008	25.3395	22.3026	23.2318	22.842	22.7593	23.3686	23.5713	22.7709	22.623	22.3576	22.9929	23.1189	22.6206	22.5135	22.8383	23.042	24.1471	22.8528	23.1744	22.746	22.8565	23.1395	22.6301	22.6753	22.8296	22.5057	23.2655	22.4883	22.6494	22.4169	22.8025	23.002	23.2521	22.6874	25.2952	22.6432	ATP5MG	O75964	ATP synthase subunit g, mitochondrial OS=Homo sapiens OX=9606 GN=ATP5MG PE=1 SV=3	4	41
27.009	26.8689	26.8518	26.9531	27.3085	27.1187	26.9288	27.0044	26.9574	28.938	27.0078	27.5648	27.3491	27.191	27.6768	27.5903	27.0841	27.0015	26.9931	27.115	27.0876	27.0833	26.9295	26.9903	27.1195	28.0017	26.8948	27.2101	26.9832	26.9831	27.1756	27.0428	27.1969	27.0768	26.8717	27.6432	27.0378	26.9821	26.8425	27.4057	27.4333	27.7397	27.1331	28.3431	26.9743	ATP5F1C	P36542	ATP synthase subunit gamma, mitochondrial OS=Homo sapiens OX=9606 GN=ATP5F1C PE=1 SV=1	4	41
27.3324	27.1632	27.177	26.9803	27.4648	27.1525	26.967	27.059	26.9198	28.8012	27.3117	27.5383	27.2047	27.2678	27.5533	27.4476	27.3184	27.3285	27.3414	27.2723	27.1631	27.3919	27.3591	27.0285	27.3195	28.1454	26.8301	27.148	26.9574	27.0142	27.1419	27.0667	27.0547	27.2866	27.011	27.7943	26.9816	27.4256	27.2767	27.6209	27.5169	27.8923	27.4344	28.4539	27.1548	ATP5PO	P48047	ATP synthase subunit O, mitochondrial OS=Homo sapiens OX=9606 GN=ATP5PO PE=1 SV=1	4	41
21.5335	21.7463	22.0645	22.1533	21.9346	21.3692	20.9975	21.4807	21.3341	22.9365	22.1344	22.5665	21.938	21.9333	21.8768	21.8966	21.558	21.5106	21.5213	21.5239	21.0729	21.6602	21.558	21.3774	21.9817	22.3585	21.1951	21.6019	21.4515	21.6829	21.381	21.8097	21.7616	21.9394	21.7877	22.2429	21.4265	21.6838	21.6424	22.5587	22.0428	22.3452	21.7584	23.6395	21.493	DMAC2L	Q99766	ATP synthase subunit s, mitochondrial OS=Homo sapiens OX=9606 GN=DMAC2L PE=1 SV=3	4	41
22.7544	22.9325	22.663	23.0384	22.4354	23.2576	22.9452	22.4577	22.2081	24.3423	22.3191	22.8239	22.417	22.8991	22.9603	23.2025	22.8425	22.6515	22.5406	23.2315	23.2546	22.5629	23.3807	23.0572	22.9683	23.9074	22.4355	23.2693	22.271	23.1118	23.2007	23.1395	22.4802	22.779	22.7327	23.5163	22.6815	23.4034	22.4968	22.3145	23.3406	23.2994	22.4619	24.4424	22.6273	ATP5PF	P18859	ATP synthase-coupling factor 6, mitochondrial OS=Homo sapiens OX=9606 GN=ATP5PF PE=1 SV=1	4	41
22.8379	22.6254	22.9132	22.3897	21.9414	22.822	22.4363	22.3024	22.836	23.2496	22.2897	22.4326	22.3699	22.2952	22.3007	22.8712	22.6373	22.0592	22.3911	22.5061	23.1046	22.4301	22.2881	22.1613	22.2816	23.449	22.0161	22.4826	22.9254	22.2048	21.9683	22.4451	22.2766	22.6253	22.3203	22.917	22.5465	22.1495	22.6071	22.0292	22.6319	23.0638	22.5389	23.065	22.0955	ATAD3B	Q5T9A4	ATPase family AAA domain-containing protein 3B OS=Homo sapiens OX=9606 GN=ATAD3B PE=1 SV=1	4	41
22.2409	22.5226	22.5126	22.1684	22.2097	21.5669	21.8507	22.2861	21.8041	20.1684	21.8275	22.2813	21.6926	22.099	22.403	21.8661	22.1314	22.2301	21.7731	21.9989	21.9647	22.2264	22.2677	22.4235	22.6698	22.1432	21.9311	21.9248	22.144	21.9213	22.041	22.173	21.7608	22.3346	22.0231	22.1374	22.0867	22.1289	21.8565	22.2915	22.2073	22.4509	22.1342	21.0559	21.8748	SPATA5	Q8NB90	ATPase family protein 2 homolog OS=Homo sapiens OX=9606 GN=SPATA5 PE=1 SV=3	4	41
26.2928	26.581	26.6776	26.2719	26.3618	26.3443	26.2338	26.3762	26.3126	26.1542	26.3919	26.5574	26.2884	26.2752	26.442	26.4623	26.4283	26.3286	26.4546	26.3313	26.5504	26.5906	26.5479	26.523	26.6274	26.4508	26.0539	26.3909	26.4189	26.3759	26.3275	26.3356	26.3657	26.2854	26.5038	26.4811	26.4061	26.3725	26.3472	26.5032	26.4507	26.4278	26.4376	25.527	26.3493	GET3	O43681	ATPase GET3 OS=Homo sapiens OX=9606 GN=GET3 PE=1 SV=2	4	41
24.3356	23.5461	23.4713	23.958	23.8366	23.9434	23.7995	24.0267	24.0283	24.6841	24.588	23.8764	23.8955	24.4952	24.6725	24.0651	23.945	24.1639	24.6621	23.4188	23.1348	23.2277	23.7599	23.5037	23.1946	23.4468	22.6515	23.9874	23.96	23.6752	23.7336	23.6838	24.1278	24.7884	23.6689	24.8432	24.3793	24.5589	24.4058	23.7494	24.253	24.2287	23.7021	23.6276	24.1223	ATP5IF1	Q9UII2	ATPase inhibitor, mitochondrial OS=Homo sapiens OX=9606 GN=ATP5IF1 PE=1 SV=1	4	41
19.1482	19.0401	19.0693	19.7262	19.0414	18.9016	19.1078	19.4282	19.7818	19.2288	19.4474	19.458	19.8131	19.5374	19.9298	19.1691	18.3508	19.7518	19.8205	19.4851	19.26	19.3654	19.2184	19.0717	19.28	20.3178	20.1992	19.6274	19.1983	19.3376	18.3788	19.7594	18.1294	19.748	19.5931	19.82	19.1585	19.2776	19.5578	19.3056	18.986	19.9604	18.5907	19.5455	19.5228	MORC2	Q9Y6X9	ATPase MORC2 OS=Homo sapiens OX=9606 GN=MORC2 PE=1 SV=2	4	41
17.9791	18.0417	20.0216	17.4802	19.9568	19.8335	19.8811	19.9483	20.319	19.9901	20.0774	20.1693	19.9614	20.2283	19.9579	20.2785	20.1039	18.1416	20.0535	18.4792	19.766	18.5489	19.3136	19.9286	19.9329	20.219	20.155	19.5492	19.7151	20.0045	20.1933	18.4679	20.2453	19.4743	20.0213	20.0128	19.9252	20.4035	19.0987	19.5434	19.7406	19.7662	19.1552	17.3018	19.3763	CLCN6	P51797	Chloride transport protein 6 OS=Homo sapiens OX=9606 GN=CLCN6 PE=1 SV=2	4	41
19.8418	18.3073	NaN	14.8469	20.6962	18.5194	20.0445	18.9246	19.3369	21.0843	20.126	21.1569	20.9824	20.476	20.6643	22.3007	22.2387	20.2277	20.1314	20.0435	22.4632	20.3616	20.2324	20.2822	20.3119	21.0208	18.9723	20.1379	18.7477	19.3761	19.9935	18.4029	22.4737	21.0604	20.0743	21.6424	19.4928	20.4785	19.9662	20.4183	18.6536	18.4952	19.9566	20.895	18.8061	MPP1	Q00013	55 kDa erythrocyte membrane protein OS=Homo sapiens OX=9606 GN=MPP1 PE=1 SV=2	3	41
20.1087	20.0891	20.9381	20.3012	21.5669	21.5933	21.8329	21.4255	20.9442	23.704	22.6318	21.9143	20.9372	22.6651	22.2998	21.3523	21.6829	21.3834	20.8136	21.286	20.1235	21.8323	20.4556	23.0958	21.4883	23.3857	22.127	21.9762	22.8412	21.4414	22.522	22.6997	22.3737	23.2882	21.8304	22.5084	21.5797	21.7839	21.1998	21.9583	21.476	21.8466	22.8542	24.7312	22.4677	CHCHD6	Q9BRQ6	MICOS complex subunit MIC25 OS=Homo sapiens OX=9606 GN=CHCHD6 PE=1 SV=1	4	41
21.291	21.2959	21.3	21.1392	21.2304	21.1239	21.2933	21.4528	21.9488	20.5448	21.6705	21.016	21.2401	21.1097	20.9593	21.6194	21.4689	21.4981	21.5183	21.3801	21.4522	21.5797	21.3403	21.3563	21.1443	21.1528	22.12	21.3509	21.7283	21.4655	21.3463	21.6356	21.7531	21.313	21.2422	21.5378	21.7103	21.4957	21.4486	21.4384	21.5199	21.4121	21.4644	20.1196	21.7191	ABCB5	Q2M3G0	ATP-binding cassette sub-family B member 5 OS=Homo sapiens OX=9606 GN=ABCB5 PE=1 SV=4	4	41
23.1132	22.7717	23.1011	23.3352	22.2059	22.8885	22.902	22.2781	22.9745	23.1797	23.1335	22.6571	22.3484	22.8199	22.836	23.6191	22.9738	22.787	22.7374	23.0373	23.2429	22.7645	22.7206	23.1161	22.9582	23.8719	22.5657	23.1605	22.7801	22.9853	23.0178	22.9066	23.3023	22.8797	22.6959	23.5115	23.0053	22.9643	22.8714	22.9095	23.5525	23.3472	22.7808	23.0991	22.8657	ABCB6	Q9NP58	ATP-binding cassette sub-family B member 6, mitochondrial OS=Homo sapiens OX=9606 GN=ABCB6 PE=1 SV=1	4	41
21.4938	21.2738	21.9902	21.5918	22.2009	21.4923	21.3096	21.386	21.5437	24.2574	21.4021	22.5723	22.5677	21.4024	22.7616	22.4337	22.0216	20.911	21.2702	21.0879	21.9182	21.4119	21.6503	21.9333	21.6049	23.154	21.9454	21.8796	21.2549	22.0454	20.9717	21.4269	21.624	21.1711	21.5492	22.7308	21.7365	20.948	21.6152	22.3953	22.7204	23.2602	21.4445	23.6421	21.5462	ABCB7	O75027	ATP-binding cassette sub-family B member 7, mitochondrial OS=Homo sapiens OX=9606 GN=ABCB7 PE=1 SV=2	4	41
21.4385	21.3746	21.2562	21.9577	21.2802	21.576	21.242	21.2326	21.4656	16.3386	21.6132	21.2991	21.4282	21.4311	21.0236	16.5959	21.2976	21.8029	21.5523	20.9677	21.2468	21.0884	21.3813	21.4561	20.8358	14.9731	21.366	21.4432	21.4436	21.3897	21.3292	21.1741	21.1585	21.1158	21.4851	21.4692	21.1965	21.5141	21.1227	21.3201	21.6094	21.3815	21.2589	NaN	21.3143	ABCC10	Q5T3U5	ATP-binding cassette sub-family C member 10 OS=Homo sapiens OX=9606 GN=ABCC10 PE=1 SV=1	4	40
19.6217	19.3145	19.6854	19.5757	19.1525	19.8294	19.4017	19.5251	19.5576	17.7963	20.1002	19.7578	19.6393	19.5643	19.4353	19.7768	19.725	19.3734	19.3754	19.6181	19.2263	19.9985	19.8038	19.7962	19.8347	19.159	20.3321	19.2684	19.2497	19.4398	19.5454	19.5972	19.4186	19.4523	19.542	19.3	19.5551	19.9013	19.5275	19.933	19.0361	19.1092	19.9448	17.5885	19.7955	ABCC3	O15438	ATP-binding cassette sub-family C member 3 OS=Homo sapiens OX=9606 GN=ABCC3 PE=1 SV=3	4	41
25.3714	25.3612	25.2687	25.4588	25.4804	25.4393	25.4219	25.1063	25.2292	26.1173	25.2556	25.428	25.3953	25.367	25.7686	25.7115	25.3714	25.4225	25.3861	25.4058	25.3194	25.427	25.1357	25.304	25.3884	26.111	25.455	25.4826	25.2998	25.3364	25.4366	25.3079	25.9939	25.4435	25.3201	25.4849	25.4048	25.2979	25.1726	25.3784	25.5442	25.7951	25.3093	28.1001	25.2997	ABCC4	O15439	ATP-binding cassette sub-family C member 4 OS=Homo sapiens OX=9606 GN=ABCC4 PE=1 SV=3	4	41
22.2597	22.5028	22.1652	22.3761	21.9025	22.1304	21.9647	22.3326	21.8904	23.9931	22.1023	22.7703	21.9797	21.539	22.934	22.4372	22.1959	22.1019	22.1048	22.1278	22.2226	22.2822	22.1067	22.3097	22.2747	22.8458	22.2457	22.0606	21.79	22.0236	22.5805	22.1186	22.5409	22.3238	21.9274	22.7279	22.3189	21.5599	22.4643	22.1979	22.6124	22.527	21.935	21.6434	21.7257	ABCD1	P33897	ATP-binding cassette sub-family D member 1 OS=Homo sapiens OX=9606 GN=ABCD1 PE=1 SV=2	4	41
25.1809	25.2371	25.4664	25.2737	25.1423	25.3103	25.4203	25.2299	25.2027	25.942	25.3195	25.3091	25.3762	25.3224	25.6173	25.6509	25.2788	25.2671	25.3289	25.0271	25.3252	25.331	25.2137	25.3164	25.4523	25.9273	25.357	25.2431	25.3824	25.3647	25.2919	25.2293	25.3461	25.3029	25.291	25.499	25.0328	25.2133	25.3331	25.107	25.5047	25.5793	25.3284	25.0576	25.3537	ABCD3	P28288	ATP-binding cassette sub-family D member 3 OS=Homo sapiens OX=9606 GN=ABCD3 PE=1 SV=1	4	41
26.89	26.4751	26.6971	26.4996	27.0131	26.7535	26.7849	26.8629	26.6085	26.4369	26.6704	26.7371	26.7711	26.6228	26.7125	26.7272	26.7832	26.8121	26.6523	26.8708	26.6653	26.8309	26.6995	26.6487	26.6769	26.5004	26.6411	26.5443	26.6901	26.661	26.7378	26.6524	26.5979	26.5741	26.7364	26.6698	26.7103	26.5964	26.5964	26.7986	26.7124	26.5262	26.6357	25.5532	26.6938	ABCE1	P61221	ATP-binding cassette sub-family E member 1 OS=Homo sapiens OX=9606 GN=ABCE1 PE=1 SV=1	4	41
25.5045	25.5294	25.4592	25.4366	25.4121	25.5737	25.6324	25.3291	25.6156	25.3283	25.5713	25.5157	25.38	25.5869	25.6307	25.6417	25.4606	25.4995	25.5453	25.4975	25.4344	25.5433	25.4666	25.5037	25.5392	25.1962	25.8518	25.2465	25.528	25.7361	25.5464	25.4331	25.0514	25.4544	25.6469	25.5911	25.5921	25.2738	25.5348	25.4186	25.5363	25.1173	25.5456	24.2952	25.5158	ABCF1	Q8NE71	ATP-binding cassette sub-family F member 1 OS=Homo sapiens OX=9606 GN=ABCF1 PE=1 SV=2	4	41
24.477	24.5095	24.5668	24.5389	24.5793	24.2927	24.542	24.631	24.6045	24.5028	24.6059	24.6297	24.3423	24.5919	24.5236	24.4271	24.6647	24.5367	24.4976	24.6199	24.5154	24.762	24.5885	24.5061	24.4267	24.2591	24.901	24.6373	24.5279	24.4331	24.5959	24.6885	24.4695	24.7983	24.6109	24.5856	24.5013	24.6151	24.4033	24.6551	24.4971	24.6242	24.6812	23.7665	24.6927	ABCF2	Q9UG63	ATP-binding cassette sub-family F member 2 OS=Homo sapiens OX=9606 GN=ABCF2 PE=1 SV=2	4	41
24.7815	24.8288	24.9666	24.8916	24.9179	24.625	24.756	24.6542	24.6524	24.4258	24.735	24.7903	24.6995	24.6765	24.8487	24.8272	24.8383	24.793	24.8046	24.675	24.7968	24.7154	24.5779	24.8561	24.7272	24.6349	24.9228	24.5351	24.5314	24.6056	24.6109	24.3832	24.5501	24.7247	24.6603	24.7875	24.6359	24.6589	24.8431	24.5745	24.7541	24.6174	24.5279	23.5491	24.6024	ABCF3	Q9NUQ8	ATP-binding cassette sub-family F member 3 OS=Homo sapiens OX=9606 GN=ABCF3 PE=1 SV=2	4	41
29.4115	29.529	29.4371	29.3378	29.6335	29.433	29.584	29.5533	29.5598	29.1529	29.481	29.6271	29.4437	29.4579	29.5763	29.7174	29.6573	29.5543	29.5097	29.4594	29.7281	29.4974	29.6308	29.6106	29.5522	29.2426	29.643	29.4907	29.5841	29.3793	29.4765	29.368	29.7738	29.5958	29.5654	29.5652	29.5171	29.5827	29.5253	29.6149	29.565	29.4255	29.4098	28.8903	29.4485	ACLY	P53396	ATP-citrate synthase OS=Homo sapiens OX=9606 GN=ACLY PE=1 SV=3	4	41
23.0125	22.9007	22.629	22.9287	23.501	23.269	23.1856	22.8932	22.4123	22.9329	23.0229	23.2896	23.1984	23.2158	23.0921	22.8254	23.3015	23.1399	22.537	23.0273	22.8627	22.9786	22.8847	22.3176	22.3459	23.016	22.7878	22.6569	22.821	23.0235	22.0729	22.8279	22.6953	23.3839	22.5575	22.4558	22.4955	22.8035	22.8345	22.3092	22.63	23.3972	22.703	22.471	22.2343	NAXD	Q8IW45	ATP-dependent (S)-NAD(P)H-hydrate dehydratase OS=Homo sapiens OX=9606 GN=NAXD PE=1 SV=1	4	41
26.9926	27.1208	27.118	26.8931	27.1807	26.9103	26.9756	27.0159	27.0105	27.1555	27.0336	27.2731	27.2249	26.9064	27.5397	27.0763	27.2337	27.0927	27.17	27.1157	27.123	27.1599	27.2156	27.2127	27.2177	27.1224	27.1652	27.0012	27.0775	27.3774	26.986	26.9709	27.0931	27.1605	27.1738	27.2502	27.122	26.9845	27.1715	27.334	27.544	27.4085	27.0633	26.3496	27.1862	PFKL	P17858	ATP-dependent 6-phosphofructokinase, liver type OS=Homo sapiens OX=9606 GN=PFKL PE=1 SV=6	4	41
25.7593	25.6632	25.4667	25.5415	25.7286	25.9216	25.8188	25.8506	25.9238	25.7101	25.6687	25.7577	25.6777	25.6707	25.7901	25.7986	25.949	25.6493	25.7093	25.6252	25.8454	25.793	25.8596	25.813	25.8196	25.7908	25.9363	25.8295	25.6324	25.5935	25.5329	25.746	25.4693	25.4523	25.7928	25.6726	25.7171	25.5927	25.5126	25.7406	25.7344	25.9557	25.5908	25.927	25.6312	PFKM	P08237	ATP-dependent 6-phosphofructokinase, muscle type OS=Homo sapiens OX=9606 GN=PFKM PE=1 SV=2	4	41
28.799	28.7083	28.8286	28.7669	28.8837	28.8098	28.7998	28.9083	28.9818	28.5755	28.8092	28.783	28.7893	28.7237	28.8218	28.8368	28.8073	28.7673	28.7158	28.7492	28.8595	28.6933	28.8317	28.8348	28.7883	28.7983	28.6644	28.6945	28.7141	28.8907	28.6354	28.648	28.6842	28.6648	28.7733	28.7612	28.8558	28.6771	28.7242	28.6651	28.9278	28.7785	28.6762	28.3747	28.6167	PFKP	Q01813	ATP-dependent 6-phosphofructokinase, platelet type OS=Homo sapiens OX=9606 GN=PFKP PE=1 SV=2	4	41
22.0962	22.3038	22.5567	22.855	23.0749	22.9198	22.5624	22.6929	22.5434	24.5118	22.8493	22.7033	22.77	22.7312	22.9338	22.9843	22.566	22.8569	22.1545	22.7625	22.4463	22.318	22.5475	22.7684	22.381	23.1441	22.5963	22.876	22.6658	22.7543	22.6159	22.6237	22.8566	22.4134	22.5531	23.1874	22.3592	22.6448	22.6957	23.0675	23.0454	23.3148	22.7613	23.6399	22.9995	CLPX	O76031	ATP-dependent Clp protease ATP-binding subunit clpX-like, mitochondrial OS=Homo sapiens OX=9606 GN=CLPX PE=1 SV=2	4	41
23.4037	23.3163	23.2662	23.3131	23.8264	23.434	23.2647	23.9062	23.527	25.2778	23.5012	23.9134	23.5401	23.827	24.1234	23.9604	23.653	23.4534	23.5306	23.5237	23.6552	23.3476	23.4328	23.2735	23.402	24.4341	23.4108	23.5586	23.3079	23.5865	23.6737	23.3599	24.0145	23.542	23.7468	24.2376	23.5531	23.5966	23.5374	24.3609	23.9994	24.2941	23.9295	24.7892	23.5154	CLPP	Q16740	ATP-dependent Clp protease proteolytic subunit, mitochondrial OS=Homo sapiens OX=9606 GN=CLPP PE=1 SV=1	4	41
27.352	27.0226	27.2146	27.2609	27.4968	27.1869	27.0888	27.1494	27.0208	27.879	27.3312	27.3181	27.1246	27.2669	27.5277	27.3789	27.2415	27.259	27.1629	27.2463	27.2921	27.3562	27.1237	27.276	27.2691	27.7967	27.1739	27.3278	27.235	27.221	27.3261	27.3477	27.0827	27.3412	27.1719	27.475	27.3834	27.2736	27.0021	27.3137	27.3324	27.6633	27.1901	27.6226	27.2449	RECQL	P46063	ATP-dependent DNA helicase Q1 OS=Homo sapiens OX=9606 GN=RECQL PE=1 SV=3	4	41
23.8272	23.6966	23.8786	24.1659	23.8872	23.7574	24.0857	24.0537	23.8391	24.0975	24.0276	23.8264	23.6505	23.6458	23.942	24.0927	23.8548	23.9282	23.7604	23.5657	23.8275	23.8445	24.1183	23.971	23.917	23.97	23.869	23.7304	23.9871	24.0143	23.8892	23.779	23.6113	24.2922	23.7218	23.8846	23.8148	23.7861	23.7027	23.7193	23.6704	23.8786	24.3251	23.2864	23.9651	DHX36	Q9H2U1	ATP-dependent DNA/RNA helicase DHX36 OS=Homo sapiens OX=9606 GN=DHX36 PE=1 SV=2	4	41
28.3189	28.2415	28.2914	28.4144	28.5554	28.198	28.2614	28.3269	28.2335	28.4334	28.2872	28.516	28.3776	28.2806	28.514	28.3495	28.3647	28.3294	28.3723	28.319	28.3342	28.2861	28.2511	28.1915	28.2904	28.5045	28.307	28.2913	28.3281	28.2655	28.3273	28.2998	28.1961	28.4007	28.156	28.5656	28.1833	28.3375	28.1789	28.4953	28.4048	28.6032	28.2936	28.2814	28.1899	DHX9	Q08211	ATP-dependent RNA helicase A OS=Homo sapiens OX=9606 GN=DHX9 PE=1 SV=4	4	41
27.7915	27.774	27.7636	27.6787	27.8626	27.8082	27.9551	27.8863	27.8683	27.6264	27.8524	27.9352	27.915	27.82	27.8602	27.8467	27.8461	27.8406	27.7881	27.8863	27.7717	27.8366	27.8795	27.7713	27.7523	27.7303	27.7777	27.7879	27.6846	27.8238	27.8243	27.7244	27.5924	27.7948	27.7607	27.7606	27.7419	27.8256	27.7994	27.9633	27.834	27.7714	27.7047	26.892	27.7801	DDX1	Q92499	ATP-dependent RNA helicase DDX1 OS=Homo sapiens OX=9606 GN=DDX1 PE=1 SV=2	4	41
23.866	23.874	23.6165	23.5237	24.2131	23.5783	23.4848	24.015	23.8006	23.653	23.7232	23.9747	23.8985	23.6527	23.9974	23.791	23.9194	23.5989	23.9857	23.9324	23.6583	23.8247	23.6973	23.3812	23.8686	23.8481	23.8073	23.2936	23.4846	23.6866	23.2208	23.7536	23.171	23.6534	23.195	23.7345	23.6709	23.47	23.2621	23.8055	23.819	23.7921	23.6776	23.5161	23.4464	DDX18	Q9NVP1	ATP-dependent RNA helicase DDX18 OS=Homo sapiens OX=9606 GN=DDX18 PE=1 SV=2	4	41
25.9119	25.8399	25.837	26.1034	25.9158	25.9511	25.8309	25.7721	25.8474	25.8857	25.8676	25.782	25.7707	25.8963	25.7487	25.8164	25.7951	25.9488	25.8102	25.6938	25.9108	25.7821	25.6752	25.7401	25.8999	25.8056	25.8686	25.8924	25.8811	25.8604	25.9854	25.7428	25.5222	25.8977	25.9786	25.9289	25.944	25.9171	25.9715	25.8359	25.8472	25.8215	25.9585	25.0456	25.601	DDX19A	Q9NUU7	ATP-dependent RNA helicase DDX19A OS=Homo sapiens OX=9606 GN=DDX19A PE=1 SV=1	4	41
19.5001	18.6495	19.2679	18.4995	19.4126	19.7796	19.0114	18.5545	19.1714	17.9946	18.471	19.4988	19.05	18.4968	18.2446	19.5637	18.3148	19.334	19.1699	19.508	19.7755	19.4768	18.8757	19.1669	18.5725	18.7409	19.0387	19.0647	19.3936	20.1555	19.3939	19.9024	NaN	19.5799	19.774	19.6405	19.5062	19.7656	19.6552	18.7894	19.919	19.6783	19.5061	NaN	19.5152	DDX19B	Q9UMR2	ATP-dependent RNA helicase DDX19B OS=Homo sapiens OX=9606 GN=DDX19B PE=1 SV=1	4	39
22.7878	23.5628	22.8247	22.9117	22.6258	23.1109	23.3402	23.1185	23.247	22.9291	23.4024	23.1415	23.4576	23.0725	22.9015	23.306	23.6378	22.9965	23.1135	23.3684	23.4089	23.0469	23.5306	23.2233	22.8888	23.2988	23.4721	22.8525	23.1131	23.8391	23.3426	22.6999	23.5945	23.3061	23.0014	22.78	22.6447	23.2812	23.6219	22.8612	23.229	22.8778	23.4423	21.005	22.9174	DDX24	Q9GZR7	ATP-dependent RNA helicase DDX24 OS=Homo sapiens OX=9606 GN=DDX24 PE=1 SV=1	4	41
16.8863	16.8837	19.741	17.0515	19.2195	17.2	18.9433	18.8357	17.52	19.2971	19.2279	17.0021	19.0485	18.621	18.8323	17.376	17.0725	18.9514	19.1867	19.2923	17.676	17.3848	16.9071	19.3824	19.4993	17.7648	16.0926	19.6637	18.7586	17.1197	16.8297	19.8616	17.2658	19.2566	19.5231	19.7486	17.1532	19.6808	16.4454	17.1807	19.6124	17.8418	19.0684	17.1823	19.4769	PLCD4	Q9BRC7	1-phosphatidylinositol 4,5-bisphosphate phosphodiesterase delta-4 OS=Homo sapiens OX=9606 GN=PLCD4 PE=1 SV=1	4	41
27.6688	27.5879	27.6149	27.7833	27.6762	27.6281	27.6889	27.6313	27.6093	27.6292	27.628	27.6569	27.5022	27.6252	27.7724	27.7126	27.7055	27.7348	27.6751	27.7148	27.6034	27.4683	27.5972	27.647	27.6401	27.6161	27.9426	27.5023	27.7592	27.7247	27.7587	27.587	27.5464	27.8265	27.6262	27.6978	27.7009	27.667	27.639	27.7014	27.7119	27.6976	27.6278	26.8893	27.7276	DDX3X	O00571	ATP-dependent RNA helicase DDX3X OS=Homo sapiens OX=9606 GN=DDX3X PE=1 SV=3	4	41
24.274	24.45	24.562	24.2552	24.6232	24.4674	24.6134	24.7387	24.2955	23.8438	24.4437	24.4718	24.5271	24.711	24.1709	24.4001	24.4784	24.5401	24.3345	24.5094	24.5068	24.3652	24.5189	24.5174	24.5179	24.1829	24.742	24.2698	24.7455	24.6455	24.3169	24.4737	24.0825	24.5349	24.3981	24.3654	24.3712	24.4253	24.5572	24.6451	24.5444	24.59	24.4568	23.2515	24.4716	DDX42	Q86XP3	ATP-dependent RNA helicase DDX42 OS=Homo sapiens OX=9606 GN=DDX42 PE=1 SV=1	4	41
22.6063	23.0906	22.8544	23.0313	23.3622	22.2715	22.6566	22.9576	22.7824	22.6501	22.3647	22.9777	22.7453	22.6883	22.6613	22.6751	22.893	22.9518	22.7106	22.4695	22.8944	22.8895	22.5379	23.1425	23.2545	22.8343	22.1347	22.2759	22.8027	22.4227	22.5921	22.9579	22.2618	22.973	22.8323	22.6554	22.8512	22.5367	23.1692	23.1044	23.0216	22.8825	22.6817	21.8956	22.6502	DDX50	Q9BQ39	ATP-dependent RNA helicase DDX50 OS=Homo sapiens OX=9606 GN=DDX50 PE=1 SV=1	4	41
20.0966	19.4147	18.6358	18.7282	19.8418	19.6039	19.6164	19.4238	19.5591	19.4572	19.8175	20.3709	20.0803	19.4243	19.7324	18.7309	19.6669	19.804	16.7397	18.5817	18.455	19.6705	18.3808	19.6771	18.1508	19.195	19.4772	16.3827	18.3665	19.5153	19.5235	NaN	18.8191	19.3668	19.3946	18.2833	16.8059	19.6499	19.3024	19.7264	19.9162	19.0876	20.0414	17.3158	17.1136	DDX51	Q8N8A6	ATP-dependent RNA helicase DDX51 OS=Homo sapiens OX=9606 GN=DDX51 PE=1 SV=3	4	40
22.6768	22.901	22.5694	22.5439	23.5754	22.9968	22.178	23.1486	23.2735	23.2518	23.121	23.0433	23.2548	23.2478	23.464	22.5929	23.3038	22.2969	23.2128	23.0307	22.5944	23.6948	22.3492	23.2459	22.5981	23.5401	23.2833	23.061	23.3078	23.113	22.513	22.9142	23.1055	23.2201	23.1377	23.4227	22.7788	23.0212	22.8381	23.7035	23.0496	23.1555	23.1515	22.6799	23.0507	DDX54	Q8TDD1	ATP-dependent RNA helicase DDX54 OS=Homo sapiens OX=9606 GN=DDX54 PE=1 SV=2	4	41
24.4649	24.566	24.5331	24.4046	24.4532	24.4899	24.5676	24.5696	24.2393	24.9089	24.5165	24.5897	24.3782	24.4999	24.6089	24.5899	24.3373	24.3373	24.4778	24.3916	24.4489	24.5059	24.5378	24.6894	24.6092	24.5373	24.649	24.434	24.509	24.4914	24.5239	24.5765	24.428	24.6625	24.3377	24.5985	24.4682	24.5414	24.3748	24.4992	24.5784	24.6487	24.4179	24.2832	24.3808	DHX29	Q7Z478	ATP-dependent RNA helicase DHX29 OS=Homo sapiens OX=9606 GN=DHX29 PE=1 SV=2	4	41
23.7998	24.2639	24.167	23.7659	24.3793	23.8095	24.0864	23.9644	24.055	25.5868	24.1609	25.0848	24.3667	24.0776	25.0738	24.4105	24.3833	23.9819	24.1247	24.1377	24.1832	24.4703	24.2813	24.2357	24.4268	24.8757	24.3611	24.2068	24.1798	23.9434	24.0089	23.8008	24.2651	24.2689	23.8651	24.5332	23.9598	24.1436	23.8176	24.5097	24.407	24.5097	24.0744	24.6847	23.7515	DHX30	Q7L2E3	ATP-dependent RNA helicase DHX30 OS=Homo sapiens OX=9606 GN=DHX30 PE=1 SV=1	4	41
19.3292	19.5182	19.6098	19.1293	19.2268	19.2394	19.5774	19.5652	19.5705	19.9031	19.2227	19.6434	18.9074	18.91	19.7445	19.9954	19.8404	19.0297	19.6562	19.4569	18.9765	19.2601	18.9306	19.6894	19.8505	19.5486	19.746	19.5193	19.3045	19.2017	19.6747	19.3607	19.4109	19.6276	19.4371	18.9679	19.4633	19.4784	19.2588	19.6605	19.0882	19.5297	19.5816	18.2231	19.6649	DHX8	Q14562	ATP-dependent RNA helicase DHX8 OS=Homo sapiens OX=9606 GN=DHX8 PE=1 SV=1	4	41
22.9479	22.4875	23.0139	23.24	23.4025	22.978	22.5908	22.8493	22.6557	24.0957	22.849	23.3141	22.8768	23.0433	23.1794	23.081	22.979	22.733	22.8651	22.9118	22.9729	23.2547	22.6136	22.9728	23.1387	23.4815	22.7465	22.912	22.9396	22.9583	22.7508	22.9501	22.6198	23.1194	22.7017	23.5041	22.7385	22.8573	22.7972	22.9637	23.2916	23.3696	22.7891	23.0803	22.8137	SUPV3L1	Q8IYB8	ATP-dependent RNA helicase SUPV3L1, mitochondrial OS=Homo sapiens OX=9606 GN=SUPV3L1 PE=1 SV=1	4	41
22.0938	21.843	22.5013	22.0936	21.978	22.3266	22.3603	22.1252	21.937	22.2841	22.3182	22.0357	21.81	21.8779	21.7957	21.8714	22.146	21.7066	21.8784	21.8666	22.0609	21.4285	21.7361	22.0364	21.7839	22.4221	22.5998	21.8311	21.9613	22.0496	22.0313	21.9455	22.0175	21.4952	21.8319	21.8499	21.7187	22.1002	22.002	21.7319	21.9953	22.4165	21.331	22.4167	22.0051	YME1L1	Q96TA2	ATP-dependent zinc metalloprotease YME1L1 OS=Homo sapiens OX=9606 GN=YME1L1 PE=1 SV=2	4	41
20.1615	20.6075	20.2937	19.023	19.5278	20.3706	20.5736	20.4032	20.5276	18.845	19.7762	20.5068	20.181	20.4913	19.8434	20.3367	19.242	19.5469	19.5754	20.5435	20.5146	20.5204	20.9246	20.256	19.9715	19.367	19.0773	20.3718	20.2167	20.4274	19.195	19.8506	20.92	19.4765	20.2357	19.9514	20.4719	20.0766	19.0806	19.9654	19.8096	20.8151	21.5789	19.0555	19.1196	NPR2	P20594	Atrial natriuretic peptide receptor 2 OS=Homo sapiens OX=9606 GN=NPR2 PE=1 SV=1	4	41
NaN	NaN	NaN	NaN	17.0055	NaN	NaN	16.8829	NaN	NaN	14.6381	16.1124	17.5498	16.0617	17.3539	NaN	16.3876	NaN	NaN	NaN	NaN	NaN	15.9942	NaN	15.8643	NaN	NaN	16.0414	17.94	NaN	NaN	NaN	NaN	NaN	NaN	NaN	NaN	NaN	NaN	18.2377	NaN	NaN	NaN	NaN	NaN	NPR3	P17342	Atrial natriuretic peptide receptor 3 OS=Homo sapiens OX=9606 GN=NPR3 PE=1 SV=2	0	13
20.7129	20.3324	19.7404	20.4451	21.4592	20.3907	19.2266	20.6429	20.4248	19.6974	20.4607	22.0181	20.3846	21.5163	21.6298	20.0212	20.5851	20.7676	18.0574	20.9096	20.604	20.8865	20.3378	20.6228	20.7055	20.9161	20.8958	20.9371	21.1751	20.1178	20.7021	20.848	19.9805	21.3353	20.3947	20.5779	20.6989	20.9443	20.6216	21.4158	20.2834	20.4978	20.6551	19.9934	20.8788	ARID1A	O14497	AT-rich interactive domain-containing protein 1A OS=Homo sapiens OX=9606 GN=ARID1A PE=1 SV=3	4	41
21.526	21.6669	21.5076	21.748	21.7869	21.5862	21.7803	21.6806	21.691	21.4536	21.7199	21.9591	21.8018	21.6013	21.8506	21.7583	21.6666	21.5033	21.6905	21.5649	21.6622	21.8379	21.4175	21.3935	21.5382	21.7711	21.6901	21.4385	21.7679	21.4786	21.6641	21.4825	21.402	21.4551	21.4167	21.6956	21.2517	21.659	21.523	21.6641	21.6976	21.9704	21.5619	20.7494	21.4598	ARID1B	Q8NFD5	AT-rich interactive domain-containing protein 1B OS=Homo sapiens OX=9606 GN=ARID1B PE=1 SV=2	4	41
18.7367	19.2733	18.8836	18.8709	19.4586	19.0844	18.5098	20.0123	18.4657	19.3974	18.9768	19.5146	18.231	19.4775	19.729	19.006	19.5516	19.0638	18.7043	18.2364	19.0833	18.9659	18.5618	18.8501	18.7382	19.0913	19.3059	18.8372	19.1459	18.9966	18.8891	18.786	18.5597	19.2023	18.6695	19.2384	18.7612	19.0346	19.0818	19.0131	18.6847	19.4564	19.2437	18.2951	17.4081	ARID2	Q68CP9	AT-rich interactive domain-containing protein 2 OS=Homo sapiens OX=9606 GN=ARID2 PE=1 SV=2	4	41
NaN	NaN	16.1864	NaN	NaN	16.6395	NaN	NaN	NaN	NaN	16.8597	16.8633	16.615	15.4713	NaN	16.2051	15.7948	16.9335	16.376	17.0422	16.1807	NaN	16.5908	NaN	NaN	15.9387	17.1057	15.5769	NaN	16.5532	15.9931	NaN	16.9914	16.772	NaN	16.7166	NaN	16.1892	15.5444	16.4839	16.3953	17.017	16.2199	NaN	15.9586	ARID4B	Q4LE39	AT-rich interactive domain-containing protein 4B OS=Homo sapiens OX=9606 GN=ARID4B PE=1 SV=2	1	27
16.6598	16.6454	16.3436	NaN	NaN	16.1887	16.5427	NaN	NaN	NaN	16.6451	NaN	16.1909	NaN	NaN	NaN	NaN	16.1909	17.0774	16.087	17.008	16.8205	17.3116	16.8738	16.6474	16.8658	16.6329	14.9233	15.5531	NaN	16.6835	NaN	NaN	16.0206	NaN	NaN	NaN	NaN	NaN	NaN	15.7182	NaN	NaN	NaN	NaN	ATN1	P54259	Atrophin-1 OS=Homo sapiens OX=9606 GN=ATN1 PE=1 SV=3	3	19
20.3538	20.595	21.3284	21.2346	21.6797	21.7275	20.8336	21.1669	21.8356	21.8028	22.393	21.3578	21.3499	21.2654	22.0992	21.3787	22.221	20.4447	20.862	20.5967	19.2965	21.2869	21.4674	21.4993	21.6263	20.7398	22.1756	21.2303	21.8906	19.2745	21.1348	21.4323	22.3638	21.6337	21.7165	20.5934	20.777	20.0136	21.0675	21.6797	20.8256	21.3596	19.3759	21.3372	22.0159	ATRN	O75882	Attractin OS=Homo sapiens OX=9606 GN=ATRN PE=1 SV=2	4	41
16.5338	16.5949	17.057	18.3831	19.0021	17.8966	18.7818	18.2894	17.9696	19.9067	17.9377	19.1218	18.5341	18.4517	18.9958	20.0274	19.5599	18.7313	18.1011	18.7921	17.6811	16.5613	18.0717	19.1311	18.9579	19.3127	18.6692	18.5269	18.7746	19.0538	18.4339	18.2655	18.6697	16.5721	18.4152	18.9738	18.3917	18.484	18.5	18.7366	19.1926	18.8827	NaN	18.786	18.6447	GATB	O75879	Glutamyl-tRNA(Gln) amidotransferase subunit B, mitochondrial OS=Homo sapiens OX=9606 GN=GATB PE=1 SV=1	4	40
17.9843	15.3509	16.5818	15.4121	15.6242	16.4968	16.2183	15.7764	18.598	18.8823	18.3665	18.4765	17.0509	16.0472	16.5002	16.5621	16.3263	16.3575	18.4892	16.8235	16.4557	16.5519	NaN	16.0617	16.3547	16.5723	16.3746	16.0486	16.0876	17.0075	16.7174	16.4116	16.5557	16.143	16.526	18.3432	15.909	16.5319	16.7333	16.276	18.791	19.2942	18.4624	18.8198	16.1054	COQ8B	Q96D53	Atypical kinase COQ8B, mitochondrial OS=Homo sapiens OX=9606 GN=COQ8B PE=1 SV=2	4	40
17.0277	17.6677	19.6811	17.8762	18.4916	19.7015	19.3699	19.9999	19.3965	18.4587	19.8703	19.6738	17.2897	19.4685	19.8591	19.6506	19.7131	17.4014	19.7777	20.4455	20.1898	17.5036	19.7695	19.8921	19.7153	19.1875	20.0306	19.8081	19.6312	19.5141	18.0971	19.5948	19.6655	17.5743	19.9039	19.6345	18.7153	19.3969	19.53	18.9356	19.3065	19.4537	19.6101	17.7394	18.558	MINDY3	Q9H8M7	Ubiquitin carboxyl-terminal hydrolase MINDY-3 OS=Homo sapiens OX=9606 GN=MINDY3 PE=1 SV=1	4	41
23.2128	23.3177	22.9358	23.1653	22.9898	22.8511	23.0697	23.1227	22.8195	22.9132	23.1642	23.2105	22.7646	22.8279	23.0714	23.166	23.0519	23.0322	23.204	23.0896	23.2609	23.1813	23.3499	23.1363	23.4202	22.8821	22.8728	22.9851	22.9003	22.8764	23.0821	23.0651	22.7347	22.8424	23.0645	23.1449	22.8797	23.0893	22.7971	23.0924	23.004	23.0813	23.0163	22.3387	22.7852	ATG5	Q9H1Y0	Autophagy protein 5 OS=Homo sapiens OX=9606 GN=ATG5 PE=1 SV=2	4	41
19.1307	18.7439	19.3622	18.0421	19.7822	18.0949	19.04	18.9698	19.3049	18.6209	18.5199	18.8775	18.5761	19.0672	19.7686	19.3158	20.092	19.7448	19.7768	19.2282	18.9425	19.0852	19.1681	19.694	19.6307	18.4243	19.3481	18.3365	19.6018	19.8828	19.3179	20.1435	18.4814	19.4817	20.177	19.4678	19.6115	19.6713	19.2911	19.1712	19.9043	19.4965	19.066	17.1908	19.2833	ATG101	Q9BSB4	Autophagy-related protein 101 OS=Homo sapiens OX=9606 GN=ATG101 PE=1 SV=1	4	41
20.5235	20.6895	21.5488	19.6473	21.5209	20.041	20.4231	20.7524	20.4988	20.3265	20.088	21.3961	20.9987	20.6381	20.7567	20.5331	20.766	20.8924	21.1163	17.9081	20.6868	21.345	21.132	21.1631	20.8191	20.1295	19.1145	17.9465	18.0433	19.1652	20.8428	20.6374	19.1919	20.7532	20.4895	19.2683	20.8086	19.0115	20.6266	20.9988	20.421	20.8258	21.4971	19.9392	18.4809	ATG13	O75143	Autophagy-related protein 13 OS=Homo sapiens OX=9606 GN=ATG13 PE=1 SV=1	4	41
22.0277	22.4047	22.2639	21.9613	22.3843	22.0365	22.4657	22.3006	22.3816	21.8295	22.0579	22.0805	22.1103	22.1117	21.9356	22.1641	22.1205	21.8228	22.1611	21.6266	22.3647	22.249	22.3068	22.5917	22.1302	21.7491	22.0951	22.0527	22.4429	22.0097	22.2223	22.263	21.9598	22.2141	22.2527	22.3207	21.9585	22.0906	22.0585	22.0777	22.4288	21.9011	22.2032	20.1013	21.9489	ATG16L1	Q676U5	Autophagy-related protein 16-1 OS=Homo sapiens OX=9606 GN=ATG16L1 PE=1 SV=2	4	41
18.7523	17.1852	NaN	13.7783	16.9238	18.2658	16.1648	18.3029	17.6688	16.5023	17.9844	18.59	16.7317	15.3017	18.7395	18.0252	18.2659	18.8567	NaN	16.3646	18.6604	17.0989	NaN	18.0717	18.3018	17.9066	17.434	16.9335	18.0505	17.5396	15.3615	17.4241	17.5699	17.4524	15.6327	17.9508	17.3784	17.768	17.4874	NaN	18.0723	NaN	17.643	NaN	NaN	ATG2A	Q2TAZ0	Autophagy-related protein 2 homolog A OS=Homo sapiens OX=9606 GN=ATG2A PE=1 SV=3	3	35
20.5595	20.5269	20.8685	19.9508	20.5421	20.5986	20.3293	20.7377	20.9482	20.5435	20.9482	20.7806	20.5997	20.7746	20.9032	20.504	20.7365	20.7703	21.0431	20.666	20.8317	20.8572	20.7324	20.7735	20.8355	20.8388	20.5161	20.5759	20.3183	19.8512	20.9811	20.5465	20.4914	20.4729	20.7711	20.5817	20.7417	20.9362	20.5201	20.5311	20.7613	20.9395	20.7735	20.0863	20.5479	ATG2B	Q96BY7	Autophagy-related protein 2 homolog B OS=Homo sapiens OX=9606 GN=ATG2B PE=1 SV=5	4	41
21.2915	21.7866	21.8971	21.4992	21.3578	21.0549	21.2705	21.8852	21.8633	21.034	20.7173	21.1909	20.1733	21.4117	21.4139	22.4073	21.5179	21.5045	21.306	21.2103	21.3915	21.4562	21.5207	21.3843	21.1182	22.6294	21.3255	21.5938	21.2308	21.9176	21.7949	20.9719	21.7808	21.2693	21.5681	21.5368	21.1585	21.7426	20.7146	20.8764	22.2325	21.6158	21.7584	20.5013	21.252	ATG9A	Q7Z3C6	Autophagy-related protein 9A OS=Homo sapiens OX=9606 GN=ATG9A PE=1 SV=3	4	41
24.4056	24.5872	24.5848	24.1077	24.2069	24.4216	24.3457	24.3724	24.4401	23.8263	24.3868	24.3629	24.2597	24.313	24.2031	24.3347	24.3825	24.2367	24.2133	24.3294	24.5475	24.4765	24.4904	24.641	24.4547	24.2809	24.323	24.2115	24.3064	24.477	24.3969	24.4491	24.2322	24.2068	24.4692	24.2599	24.447	24.4237	24.3775	24.3629	24.3127	24.1693	24.1121	23.2203	24.324	AIDA	Q96BJ3	Axin interactor, dorsalization-associated protein OS=Homo sapiens OX=9606 GN=AIDA PE=1 SV=1	4	41
17.3433	16.838	16.9618	16.7853	16.8316	NaN	16.5717	17.755	17.3883	17.0774	NaN	16.5261	NaN	16.6956	17.3257	16.3816	16.7306	17.4393	16.7027	17.3357	16.5033	16.3833	17.0977	17.3225	16.4948	15.5465	17.4086	NaN	16.9174	17.9247	17.0032	16.771	16.3949	17.1765	16.9114	17.3205	NaN	16.4883	18.0187	16.4314	NaN	NaN	17.1233	NaN	17.1521	AXIN1	O15169	Axin-1 OS=Homo sapiens OX=9606 GN=AXIN1 PE=1 SV=2	4	33
17.6749	19.516	18.2631	17.5677	19.7255	19.4784	20.0808	19.8961	20.0744	19.7281	19.7698	19.9588	19.3542	19.5156	19.7682	19.4404	19.5564	19.2841	17.5161	19.5241	19.5084	19.7564	20.1812	19.674	20.269	19.867	20.0974	20.0142	19.86	20.1731	19.8093	20.0142	18.3978	20.6647	19.8719	20.1167	17.9652	19.6806	19.6847	19.7499	19.7696	19.9203	19.5903	16.86	20.3955	FBXO6	Q9NRD1	F-box only protein 6 OS=Homo sapiens OX=9606 GN=FBXO6 PE=1 SV=1	4	41
19.6969	19.8522	20.0577	22.1767	21.3089	21.5198	21.5165	20.9691	19.7987	21.5778	21.648	20.3257	21.2311	19.6761	19.464	21.5606	21.4826	19.4904	22.1369	21.9423	21.7284	19.6872	19.6528	21.4236	21.557	21.7582	21.1996	22.1989	21.7661	21.9917	22.2026	21.9946	21.7616	22.2675	21.8954	22.1174	21.7931	21.9751	22.0176	21.8471	21.9484	22.3342	21.8376	21.6004	22.0253	RBFOX2	O43251	RNA binding protein fox-1 homolog 2 OS=Homo sapiens OX=9606 GN=RBFOX2 PE=1 SV=3	4	41
23.6911	23.6527	23.4917	23.5613	23.3605	25.1063	26.8206	23.5451	23.535	25.0458	26.3397	25.0935	23.7686	23.714	24.5392	24.2735	24.3541	24.1664	24.0399	24.0218	23.6265	24.1173	24.1364	24.7362	23.8012	26.2875	29.1858	24.0487	23.719	24.1148	25.5083	24.7082	24.4557	25.2692	24.4219	25.0049	24.4101	24.0417	24.2062	24.6715	24.2525	24.6372	24.2888	25.581	26.5179	CHMP2B	Q9UQN3	Charged multivesicular body protein 2b OS=Homo sapiens OX=9606 GN=CHMP2B PE=1 SV=1	4	41
20.1637	18.4733	18.486	17.6829	21.3747	21.0903	19.3428	20.8647	21.248	19.8802	20.3815	20.7016	20.4094	19.1069	18.7261	19.0306	20.9755	20.1991	19.5413	18.8909	20.2436	20.5454	20.052	21.1274	18.6958	20.5595	18.374	18.8798	18.8221	18.5836	18.4847	20.8622	18.5331	20.5225	18.8113	20.8683	20.8119	20.8386	18.438	20.6017	20.6791	18.6786	20.9298	18.3813	20.2818	CHCHD1	Q96BP2	Coiled-coil-helix-coiled-coil-helix domain-containing protein 1 OS=Homo sapiens OX=9606 GN=CHCHD1 PE=1 SV=1	4	41
18.9496	18.9958	19.2671	18.5383	18.8403	18.8061	19.0434	19.0878	18.9837	18.3473	18.7262	18.8176	18.8374	18.8259	18.6905	18.907	18.8435	18.5308	18.7995	18.8347	19.4131	19.3623	19.4282	19.3112	19.3923	18.5515	18.6102	18.5461	18.725	18.6327	18.6954	18.624	18.7768	18.4017	18.8594	18.7738	18.3951	18.9471	18.5589	18.7808	18.7105	18.5793	18.6593	17.2609	18.7066	BIRC3	Q13489	Baculoviral IAP repeat-containing protein 3 OS=Homo sapiens OX=9606 GN=BIRC3 PE=1 SV=2	4	41
21.7128	22.0877	22.1274	21.9677	21.5518	22.005	21.8835	22.0318	21.9114	21.6148	21.7262	21.923	21.825	21.7815	21.8943	22.1456	21.7541	22.1366	22.1284	22.0124	22.1706	21.6517	21.8162	21.9428	22.3714	21.907	22.2175	21.6323	22.1987	22.3289	21.5583	21.4748	21.2254	21.9249	22.0986	21.7781	21.8794	21.842	22.3287	21.8673	21.6731	21.4826	22.1845	19.5798	21.8462	BIRC6	Q9NR09	Baculoviral IAP repeat-containing protein 6 OS=Homo sapiens OX=9606 GN=BIRC6 PE=1 SV=2	4	41
19.3269	19.8149	19.8467	19.5908	19.9774	18.9987	NaN	NaN	19.1293	20.1018	19.2427	19.4529	18.9308	19.4043	19.5423	19.5954	20.1093	19.2429	19.9484	19.597	19.3001	20.1536	19.1828	19.1178	NaN	19.7803	19.9449	19.6769	19.2647	19.5256	19.9298	20.0241	19.6717	20.0868	19.6947	19.837	19.7779	20.0287	19.5687	19.3291	19.8306	20.3877	19.9393	19.7369	20.1825	BAG1	Q99933	BAG family molecular chaperone regulator 1 OS=Homo sapiens OX=9606 GN=BAG1 PE=1 SV=4	4	38
26.3094	26.2091	26.0708	26.1925	25.7786	26.0352	25.9474	26.114	26.1816	25.9912	26.013	25.9421	25.9568	26.0541	25.7472	26.2231	26.001	26.1021	26.0511	26.0358	26.2497	26.0754	25.952	25.8994	25.8715	26.1315	25.8216	25.854	25.8729	25.9338	25.869	25.7764	25.588	25.8505	25.8864	25.9081	26.0284	25.8748	25.9003	25.9068	26.0045	25.8671	25.8889	25.8415	25.7388	BAG2	O95816	BAG family molecular chaperone regulator 2 OS=Homo sapiens OX=9606 GN=BAG2 PE=1 SV=1	4	41
25.0378	25.211	25.0901	25.1178	24.9935	24.9839	25.0152	24.7104	24.8346	24.7399	24.6673	24.9332	24.6782	24.9841	24.9336	24.8046	24.8036	25.2365	24.9226	24.962	24.9017	25.0522	25.1029	24.9513	24.8468	24.1891	24.7227	25.097	24.8665	24.9126	24.9024	24.855	24.8645	24.9075	24.8723	25.1061	25.0505	25.1322	25.095	25.0824	25.0096	25.0191	24.9392	23.9736	25.038	BAG3	O95817	BAG family molecular chaperone regulator 3 OS=Homo sapiens OX=9606 GN=BAG3 PE=1 SV=3	4	41
21.5466	21.7105	21.4701	21.5705	22.5356	22.3265	22.3242	22.437	22.3787	22.556	22.3108	22.4735	22.5863	22.2245	21.9006	22.0704	22.0412	21.8399	22.4519	22.3096	21.8243	21.8567	21.8098	21.8522	21.6304	22.1034	22.3563	21.5803	22.0633	21.8077	22.0736	21.5576	21.9353	21.8626	21.1793	22.1812	21.9436	22.1239	21.6517	21.8182	21.9257	21.7754	22.2305	20.6278	22.3442	BAG5	Q9UL15	BAG family molecular chaperone regulator 5 OS=Homo sapiens OX=9606 GN=BAG5 PE=1 SV=1	4	41
19.4787	16.8061	19.377	16.0968	20.6898	20.1871	19.1854	20.7048	20.8243	17.7716	18.7391	18.2606	17.2239	19.8039	17.9203	19.9314	15.3312	19.9137	19.8313	19.6351	19.8848	19.8393	19.8406	18.3994	17.5633	18.2505	21.9757	16.7933	19.6061	16.9156	17.9375	19.6465	15.8973	17.7376	19.9705	20.4071	17.221	20.6042	20.3436	20.5483	20.1408	20.4328	20.6831	NaN	20.3357	TNFAIP3	P21580	Tumor necrosis factor alpha-induced protein 3 OS=Homo sapiens OX=9606 GN=TNFAIP3 PE=1 SV=1	4	40
23.715	23.6794	23.5115	23.5854	23.7445	23.9313	24.0014	23.8664	24.0255	23.0222	24.1498	23.5748	23.6419	23.8126	23.6089	23.8446	24.0021	23.5285	23.5712	23.7344	24.0613	23.5927	23.9344	23.7317	23.7123	23.0932	24.1517	23.7524	23.4846	23.9965	23.9693	23.8116	23.7131	23.6462	23.9682	23.3083	23.7966	23.5991	23.6084	23.4911	23.1843	23.278	23.843	21.6656	23.8687	EPB41L2	O43491	Band 4.1-like protein 2 OS=Homo sapiens OX=9606 GN=EPB41L2 PE=1 SV=1	4	41
20.8524	20.8783	20.6819	20.9887	20.8289	19.7997	20.3022	21.4568	20.3634	19.612	20.087	19.8252	19.9306	19.9342	20.6597	20.7275	20.2139	20.7128	20.4902	20.019	20.7357	21.0802	20.6758	20.0417	20.8313	20.3835	20.3647	20.7352	20.9325	20.1218	19.6146	20.2508	19.5737	21.5143	20.7911	20.7825	20.4296	20.5647	20.102	20.0913	20.5715	19.9478	21.6717	18.2273	19.7436	CHURC1	Q8WUH1	Protein Churchill OS=Homo sapiens OX=9606 GN=CHURC1 PE=1 SV=2	4	41
19.108	18.0705	17.4629	19.9107	19.9725	20.7344	21.1889	19.4533	19.9806	21.9397	18.7282	20.3068	20.0231	19.5343	20.9238	20.8809	20.2757	19.9026	19.5787	20.3136	20.8483	19.5343	19.9959	20.113	19.6284	21.2611	22.1377	19.694	20.3422	20.0568	20.2019	20.3538	20.6809	20.4766	20.229	20.4319	20.3087	20.2781	20.47	18.8375	20.8325	19.8136	20.2857	19.3042	20.3925	SLC2A6	Q9UGQ3	Solute carrier family 2, facilitated glucose transporter member 6 OS=Homo sapiens OX=9606 GN=SLC2A6 PE=1 SV=2	4	41
18.904	18.2591	18.0945	19.2329	18.2748	NaN	19.0579	19.1975	NaN	18.7455	18.4809	17.7234	18.7286	19.1697	18.3765	19.4723	19.3191	18.2153	18.2843	18.2443	18.1661	18.8981	18.7387	18.1877	19.2979	19.2964	18.1987	19.508	19.4123	18.2778	19.3166	19.1199	18.9206	18.7704	19.196	19.5003	19.2594	19.2665	19.1939	19.0598	17.8862	17.8049	17.7176	17.0137	18.3023	BBS4	Q96RK4	Bardet-Biedl syndrome 4 protein OS=Homo sapiens OX=9606 GN=BBS4 PE=1 SV=2	4	39
17.1976	NaN	18.6553	16.8131	16.6569	18.8401	18.3872	NaN	NaN	19.5324	19.2146	20.1238	18.4514	19.9992	19.5016	16.2786	NaN	NaN	15.9154	17.8284	NaN	18.2073	NaN	18.8859	19.2934	19.4707	18.9228	17.9314	18.0711	18.1655	20.2084	18.8306	20.1932	19.8647	17.8855	18.3584	19.5292	17.7912	NaN	17.8852	18.9074	NaN	19.8419	NaN	19.6603	NADK	O95544	NAD kinase OS=Homo sapiens OX=9606 GN=NADK PE=1 SV=1	3	32
26.1562	25.9474	25.9114	25.7126	26.0073	25.8906	25.7438	25.8973	25.9011	26.001	25.8957	25.7889	25.8035	25.7234	25.6474	26.1078	25.7352	25.8633	25.9917	25.9624	26.0581	25.9067	25.906	25.7403	25.8017	26.207	25.5242	25.7447	25.623	25.9989	25.7968	25.8896	25.6201	25.7349	25.7388	26.0911	25.6822	25.9458	25.8009	25.7306	26.0246	25.9706	25.5764	26.0075	25.8389	BANF1	O75531	Barrier-to-autointegration factor OS=Homo sapiens OX=9606 GN=BANF1 PE=1 SV=1	4	41
NaN	18.3013	NaN	NaN	17.6919	17.6291	17.2985	NaN	17.7908	NaN	NaN	NaN	17.7838	NaN	NaN	21.6583	19.214	17.3653	18.0182	18.9629	19.7801	18.1536	17.988	18.001	17.738	NaN	NaN	18.0101	NaN	16.5054	17.5741	NaN	21.2213	17.7589	17.7485	18.8391	NaN	18.0554	18.1442	NaN	17.9276	NaN	17.6741	NaN	NaN	BCAM	P50895	Basal cell adhesion molecule OS=Homo sapiens OX=9606 GN=BCAM PE=1 SV=2	1	26
15.3838	20.3846	14.3419	15.6428	19.4438	16.8381	19.5857	NaN	20.262	21.7486	19.8592	17.1315	15.9734	17.0746	17.371	20.1986	16.7458	16.5054	15.6429	16.297	16.0354	15.9839	15.4052	15.015	20.2324	21.4609	14.7583	NaN	NaN	16.4484	18.0163	NaN	17.2982	17.2125	16.857	19.2034	NaN	15.9358	NaN	NaN	17.8319	19.2303	17.014	22.6505	20.3966	NFAM1	Q8NET5	NFAT activation molecule 1 OS=Homo sapiens OX=9606 GN=NFAM1 PE=1 SV=1	4	34
26.7173	26.5764	26.4721	26.39	26.6668	26.3743	26.5958	26.5732	26.5313	26.6115	26.6599	26.3445	26.4831	26.3469	26.4533	26.8241	26.443	26.432	26.5736	26.7704	26.5364	26.6633	26.6781	26.655	26.5865	26.6924	26.7063	26.7671	26.821	26.4715	26.6409	26.6567	26.616	26.572	26.4821	26.6032	26.5071	26.5762	26.385	26.8444	26.6805	26.802	26.5178	26.1692	26.6354	BZW1	Q7L1Q6	Basic leucine zipper and W2 domain-containing protein 1 OS=Homo sapiens OX=9606 GN=BZW1 PE=1 SV=1	4	41
25.7733	25.5386	25.5835	25.5739	25.8474	25.5284	25.5357	25.5976	25.6348	25.7276	25.6954	25.7707	25.5971	25.585	25.6488	25.6512	25.6271	25.4794	25.583	25.5343	25.7609	25.9096	25.8103	25.7517	25.9099	25.6827	25.608	25.751	25.7062	25.6614	25.7334	25.8179	25.5244	25.7066	25.6804	26.0578	25.6103	25.6384	25.6198	25.8717	25.9056	25.802	25.777	25.473	25.6767	BZW2	Q9Y6E2	Basic leucine zipper and W2 domain-containing protein 2 OS=Homo sapiens OX=9606 GN=BZW2 PE=1 SV=1	4	41
NaN	NaN	NaN	NaN	NaN	NaN	NaN	NaN	NaN	NaN	NaN	NaN	NaN	NaN	NaN	NaN	NaN	NaN	NaN	NaN	NaN	NaN	NaN	NaN	NaN	NaN	NaN	21.2354	NaN	NaN	NaN	NaN	NaN	NaN	NaN	NaN	NaN	NaN	NaN	NaN	NaN	NaN	NaN	NaN	NaN	PRB2	P02812	Basic salivary proline-rich protein 2 OS=Homo sapiens OX=9606 GN=PRB2 PE=1 SV=3	0	1
26.995	27.0704	26.9513	27.2404	26.7945	26.9328	27.1761	26.8174	26.9202	27.0544	27.0621	26.8196	26.8318	26.8342	26.9191	26.9057	27.0054	26.9692	27.0051	26.9696	27.0243	27.019	26.8632	26.8132	26.704	26.4775	27.5201	26.9816	26.9909	26.9463	27.136	27.1364	27.1115	27.0713	26.9798	26.6296	26.9882	27.0107	27.0101	27.0067	26.6933	26.7263	26.9073	25.3014	27.2001	BSG	P35613	Basigin OS=Homo sapiens OX=9606 GN=BSG PE=1 SV=2	4	41
21.3167	21.444	21.4627	21.214	18.6726	19.6688	20.1241	19.7704	21.4861	21.9354	21.453	20.2812	20.9938	21.1816	21.2337	21.3462	21.0242	21.4263	21.6835	20.944	21.2887	21.0614	21.268	21.6261	21.4633	22.0591	21.1519	21.3347	21.4137	21.1632	21.3081	21.5599	21.0592	20.9453	21.3008	21.6283	21.0779	20.8746	21.2184	21.057	21.52	21.4808	21.0149	20.562	20.8701	CLN3	Q13286	Battenin OS=Homo sapiens OX=9606 GN=CLN3 PE=1 SV=1	4	41
21.4175	22.1507	22.2386	21.4202	21.0709	21.18	22.1367	21.8447	22.0467	23.8614	22.4007	22.7658	21.8468	21.7314	23.3583	21.9064	22.088	21.7133	22.1824	21.9552	21.7211	22.5364	22.6789	22.0962	23.2792	22.749	21.8063	22.3852	23.4657	22.6804	22.3888	22.9606	22.4691	22.2162	22.7517	20.9987	21.9326	22.0629	22.5597	22.1149	22.664	22.0914	23.1304	22.934	22.5826	TMBIM6	P55061	Bax inhibitor 1 OS=Homo sapiens OX=9606 GN=TMBIM6 PE=1 SV=2	4	41
21.6486	21.177	21.4156	20.9865	21.4083	20.9431	20.9704	21.0888	21.281	20.9414	21.1579	20.8973	21.0843	21.0654	21.3237	21.049	21.2338	21.0908	20.9777	21.1462	21.3771	20.9891	21.2473	21.6997	21.2221	21.4469	21.1071	21.5623	21.6296	21.6716	21.2807	21.1443	21.3862	21.1333	21.5479	21.0942	20.9421	21.4719	21.1382	21.1753	20.7974	20.7975	21.6442	20.17	21.1134	BCL7C	Q8WUZ0	B-cell CLL/lymphoma 7 protein family member C OS=Homo sapiens OX=9606 GN=BCL7C PE=1 SV=3	4	41
22.9831	22.7857	22.9509	22.9367	22.7478	22.6144	22.6471	22.7733	22.8566	23.1168	22.8266	22.7934	22.4297	22.7598	22.6793	22.7015	22.8627	22.9503	22.9124	22.7811	23.1218	23.0713	22.9828	22.8163	23.0568	22.7223	22.3471	22.8265	22.6561	22.8783	22.9725	21.9469	22.7359	22.8867	22.2101	23.0129	22.9448	23.0337	23.0198	23.024	22.8094	23.0794	23.1688	23.0126	22.9819	BCL10	O95999	B-cell lymphoma/leukemia 10 OS=Homo sapiens OX=9606 GN=BCL10 PE=1 SV=1	4	41
23.1263	22.9395	22.7766	22.9206	23.0172	23.3111	23.3281	22.6991	23.2865	22.5555	23.3062	22.6637	23.1816	22.7167	22.7134	22.7899	23.0249	22.9964	23.0997	23.087	23.0846	22.9744	23.0888	23.1909	23.2076	23.4448	23.4819	23.0133	23.0771	22.8964	23.4603	22.9942	23.1789	23.1348	23.0117	23.0297	23.1644	23.1027	22.9329	23.3837	22.9599	23.4771	23.2116	22.1857	23.2546	BCAP29	Q9UHQ4	B-cell receptor-associated protein 29 OS=Homo sapiens OX=9606 GN=BCAP29 PE=1 SV=2	4	41
26.589	26.553	26.4874	26.8327	26.6418	26.7234	26.7281	26.7564	26.5919	26.4453	26.5219	26.8124	26.7288	26.6318	26.7004	26.4529	26.5232	26.6805	26.651	26.8829	26.415	26.7106	26.5175	26.6253	26.3911	26.5321	27.0912	26.838	26.6521	26.406	26.6754	26.6421	26.9143	26.6259	26.5541	26.46	26.6084	26.7966	26.522	26.79	26.6931	26.8382	26.7833	26.6252	26.7109	BCAP31	P51572	B-cell receptor-associated protein 31 OS=Homo sapiens OX=9606 GN=BCAP31 PE=1 SV=3	4	41
NaN	NaN	NaN	NaN	NaN	NaN	NaN	NaN	NaN	17.5493	NaN	NaN	NaN	NaN	15.0686	NaN	NaN	NaN	NaN	NaN	NaN	NaN	NaN	NaN	NaN	NaN	NaN	NaN	NaN	NaN	NaN	NaN	NaN	NaN	NaN	NaN	15.6716	NaN	NaN	NaN	NaN	NaN	NaN	NaN	NaN	BANK1	Q8NDB2	B-cell scaffold protein with ankyrin repeats OS=Homo sapiens OX=9606 GN=BANK1 PE=1 SV=3	0	3
21.9293	22.025	21.2125	21.979	20.6733	21.2131	21.1689	20.9971	22.0859	21.919	21.7674	21.6683	21.5963	21.2035	21.7754	21.2904	21.1294	20.7879	21.9589	21.2713	20.7009	21.561	21.6153	21.7582	22.208	21.8581	20.5137	21.686	21.6335	21.5737	21.7226	20.6622	21.4162	21.5565	21.4871	22.6061	21.734	21.6593	22.9285	21.8504	21.7641	21.6489	21.3899	21.541	21.4048	BAK1	Q16611	Bcl-2 homologous antagonist/killer OS=Homo sapiens OX=9606 GN=BAK1 PE=1 SV=1	4	41
20.8303	20.4341	20.6972	20.0323	20.2199	20.6926	20.7965	20.8206	20.0876	21.3685	20.4392	21.0199	20.0012	20.6302	20.7469	20.8729	20.5168	20.3029	19.9765	20.1982	19.9457	20.6829	20.7636	20.4118	21.0101	20.5083	20.5864	20.3888	20.1763	20.018	20.0376	20.8451	20.92	20.4506	20.6306	20.9559	20.338	20.2835	20.1007	20.6922	20.3292	20.7232	20.319	17.5951	20.9377	BNIP2	Q12982	BCL2/adenovirus E1B 19 kDa protein-interacting protein 2 OS=Homo sapiens OX=9606 GN=BNIP2 PE=1 SV=1	4	41
21.709	21.408	21.7628	21.7407	21.3678	21.7953	21.4292	21.3802	21.2603	20.4729	21.537	21.7153	21.3203	21.9567	21.3029	21.9867	21.8504	22.0317	21.8416	21.776	21.7274	21.9856	21.9745	21.6062	21.8842	21.77	21.5714	22.0225	21.8529	21.8497	22.0086	22.0814	21.4927	21.8947	21.9334	22.3374	21.9817	22.1338	22.0704	22.4024	21.6581	21.8376	22.1705	20.6448	21.2337	BNIP3L	O60238	BCL2/adenovirus E1B 19 kDa protein-interacting protein 3-like OS=Homo sapiens OX=9606 GN=BNIP3L PE=1 SV=1	4	41
21.4668	21.7908	21.7864	22.5702	21.0986	22.3575	21.8983	22.0644	22.2098	20.9321	20.8928	21.6964	21.9676	21.3542	21.8388	22.1108	22.3418	21.5184	21.6212	21.8823	22.5011	21.8803	21.3303	21.2395	21.8583	21.4929	21.5931	21.6268	21.5845	21.7362	21.8887	21.7324	21.4265	21.9596	22.5943	22.5061	22.093	21.8196	21.5723	21.745	22.4223	22.0809	21.9435	19.2601	21.43	BAD	Q92934	Bcl2-associated agonist of cell death OS=Homo sapiens OX=9606 GN=BAD PE=1 SV=3	4	41
24.9413	25.0029	24.9011	24.9339	24.8771	25.083	25.1611	25.1574	24.9648	25.0174	25.1388	24.9651	24.7232	24.919	24.9241	25.0847	24.9146	25.0425	25.0313	24.8445	25.1332	25.0064	25.0293	25.1052	25.1275	25.2781	24.9241	24.9809	24.9579	24.9422	25.0144	24.8829	24.7733	24.7113	24.812	25.0771	24.7781	25.0209	24.8355	24.9215	24.815	24.9622	24.8625	24.6136	25.019	BCLAF1	Q9NYF8	Bcl-2-associated transcription factor 1 OS=Homo sapiens OX=9606 GN=BCLAF1 PE=1 SV=2	4	41
21.3684	21.5515	21.6583	21.0867	20.6735	21.4496	21.3774	21.5258	21.262	20.8409	20.8255	21.3205	21.7635	21.4306	21.6415	21.6431	21.5891	21.195	21.3202	21.4426	21.3473	21.2674	21.2554	21.8285	21.2255	21.4819	20.7659	21.1707	21.3396	22.0671	21.5585	21.461	21.2263	21.3805	21.5815	21.2349	21.086	21.3289	21.6763	21.1117	21.8835	21.3457	20.5035	19.7689	21.4353	BCL2L1	Q07817	Bcl-2-like protein 1 OS=Homo sapiens OX=9606 GN=BCL2L1 PE=1 SV=1	4	41
23.8871	23.7462	23.8232	23.4609	23.6437	23.9906	23.89	23.6566	23.6924	24.2672	24.0276	24.157	24.108	24.0305	24.1175	24.2541	23.8114	23.9699	23.6422	23.8267	24.1234	23.6018	23.6729	23.7794	23.7781	24.6707	23.5214	23.6698	23.8116	24.4037	24.0157	23.6703	23.7965	23.7942	23.6881	23.986	23.7639	23.5507	24.0973	23.7853	24.2756	23.9666	23.7543	25.5593	23.6299	BCL2L13	Q9BXK5	Bcl-2-like protein 13 OS=Homo sapiens OX=9606 GN=BCL2L13 PE=1 SV=1	4	41
19.216	17.7567	18.0556	17.5432	20.7101	19.5276	19.5626	19.6177	18.1713	21.6895	20.2311	21.1405	19.3055	19.2598	21.4861	20.1231	20.3008	18.0918	18.3681	19.5035	17.7828	18.5932	17.8217	18.3873	19.2053	20.9453	22.0872	18.9896	19.2417	18.176	19.8024	19.2618	20.3622	21.5383	19.323	20.8513	20.0539	18.9654	18.6668	19.8981	19.6735	20.0652	20.8767	19.2262	19.7332	PREX1	Q8TCU6	Phosphatidylinositol 3,4,5-trisphosphate-dependent Rac exchanger 1 protein OS=Homo sapiens OX=9606 GN=PREX1 PE=1 SV=3	4	41
21.8679	21.5652	21.7639	21.2633	22.0554	21.5519	21.5956	21.7506	21.4389	21.9239	22.0706	21.7652	21.5269	21.3154	22.0073	21.7975	21.9155	21.8419	21.7216	21.4093	21.8808	21.7534	21.6359	21.6058	21.8312	21.9109	21.9438	21.6869	21.4983	21.5854	21.5132	21.779	21.6867	21.5214	21.5195	22.0008	21.6398	21.3005	21.7104	21.8048	21.8923	21.8051	21.6689	19.4207	22.0181	BECN1	Q14457	Beclin-1 OS=Homo sapiens OX=9606 GN=BECN1 PE=1 SV=2	4	41
21.4575	20.4684	22.4821	21.7592	21.7868	22.7645	22.6559	21.6879	19.1753	21.524	20.842	20.1204	21.1513	21.6639	20.6913	22.0626	19.296	20.9995	20.998	21.8351	21.7408	22.5634	22.9549	22.3691	22.2766	21.7591	22.233	21.7977	21.7152	22.354	22.3571	21.2054	21.2637	21.4011	21.1985	21.5925	21.0432	20.3318	21.9203	21.6021	21.6996	22.0492	21.7735	21.258	22.3203	BET1	O15155	BET1 homolog OS=Homo sapiens OX=9606 GN=BET1 PE=1 SV=1	4	41
21.3564	21.3385	21.325	20.9884	21.5842	21.5353	21.6392	21.8634	21.5363	21.3182	20.9714	21.3485	21.0525	20.9675	21.2953	21.288	21.1485	21.2362	21.1268	21.0977	21.3431	20.9758	20.95	21.2779	21.3874	21.1012	21.027	21.1416	21.1736	21.2687	21.2694	21.0439	20.6093	20.4446	20.7363	20.5695	20.96	21.1209	20.7466	20.5906	20.5047	20.4469	20.4173	19.956	20.9043	BET1L	Q9NYM9	BET1-like protein OS=Homo sapiens OX=9606 GN=BET1L PE=1 SV=1	4	41
23.624	23.7399	23.7458	23.4111	23.3996	23.5485	22.8201	23.7653	23.897	23.1494	23.7447	23.6476	23.8631	24.076	23.5565	23.8865	23.9144	23.5915	23.7445	23.7902	24.03	23.881	23.7922	23.4973	23.9795	23.2746	20.12	23.6586	23.5485	23.802	23.3671	23.6248	23.6988	23.094	23.9876	23.9157	23.7502	23.6623	23.8386	23.7777	23.9573	23.7951	23.84	22.7258	23.0664	CRYBG1	Q9Y4K1	Beta/gamma crystallin domain-containing protein 1 OS=Homo sapiens OX=9606 GN=CRYBG1 PE=1 SV=3	4	41
22.5727	22.4178	21.9264	22.4258	22.1648	21.5375	22.6894	22.2358	21.6187	23.5693	22.4727	22.5968	22.6373	22.7725	22.8214	22.8107	22.7647	22.2041	22.8643	22.2181	22.6732	22.0799	22.0657	21.89	22.5617	22.4804	23.0502	22.2798	22.811	22.7185	21.9441	22.2203	21.9918	22.2106	22.0956	22.8033	21.8287	22.8143	22.5941	22.24	22.6139	23.0048	22.3565	23.0397	22.1737	B3GALT6	Q96L58	Beta-1,3-galactosyltransferase 6 OS=Homo sapiens OX=9606 GN=B3GALT6 PE=1 SV=2	4	41
22.0451	22.3236	22.3613	21.9948	21.9535	22.4126	22.7675	22.4107	22.3282	22.758	22.5357	22.3129	22.2795	22.0522	22.4526	22.4908	22.1323	22.2793	22.2729	22.3837	22.4171	22.6329	22.1072	22.3387	22.4822	22.6297	22.6931	21.8023	21.8263	22.5382	22.3478	22.1542	21.9528	22.3684	22.2989	22.4169	22.2455	22.0066	22.525	22.1794	22.6437	22.4989	21.8996	22.9242	22.2914	B3GLCT	Q6Y288	Beta-1,3-glucosyltransferase OS=Homo sapiens OX=9606 GN=B3GLCT PE=1 SV=2	4	41
17.6327	NaN	17.8597	18.451	NaN	18.8315	17.7743	17.7615	NaN	17.6272	17.5164	17.0014	17.7529	NaN	17.5333	NaN	NaN	NaN	NaN	16.8486	17.4452	NaN	NaN	NaN	17.8432	NaN	NaN	17.4992	18.4085	NaN	17.8648	18.1178	17.9833	18.3657	17.64	NaN	NaN	NaN	17.821	NaN	NaN	NaN	NaN	16.2679	19.1993	LFNG	Q8NES3	Beta-1,3-N-acetylglucosaminyltransferase lunatic fringe OS=Homo sapiens OX=9606 GN=LFNG PE=1 SV=2	3	21
24.0464	23.7488	24.1726	24.3067	23.673	23.914	24.0195	23.7363	23.8895	24.0794	23.8688	23.9959	23.994	23.6897	23.9063	23.9106	23.8748	23.8417	23.7792	23.9049	23.6101	23.7794	23.9434	24.0255	23.9394	24.0534	24.9713	23.6597	23.7538	23.7719	24.0756	23.9142	23.6611	23.8887	23.9227	23.7884	24.0866	23.6002	24.1037	23.8206	23.8666	23.7717	23.8708	23.8226	23.9839	B4GALT1	P15291	Beta-1,4-galactosyltransferase 1 OS=Homo sapiens OX=9606 GN=B4GALT1 PE=1 SV=5	4	41
NaN	NaN	NaN	NaN	NaN	NaN	NaN	NaN	NaN	17.7447	NaN	NaN	NaN	NaN	NaN	NaN	NaN	NaN	NaN	NaN	NaN	NaN	NaN	NaN	NaN	NaN	17.4409	NaN	NaN	NaN	NaN	NaN	NaN	NaN	NaN	NaN	NaN	NaN	NaN	NaN	NaN	NaN	NaN	17.3284	17.4988	B4GALT5	O43286	Beta-1,4-galactosyltransferase 5 OS=Homo sapiens OX=9606 GN=B4GALT5 PE=1 SV=1	0	4
20.3374	20.461	19.7657	20.4236	20.3296	20.1695	20.7593	20.4345	20.0142	21.1992	20.3494	21.0201	20.1992	19.859	20.636	20.3363	20.5212	19.3614	20.1364	20.3547	19.5786	20.5085	20.6008	21.2477	20.5793	20.7566	20.825	20.3283	20.5961	20.1042	20.0076	20.1616	19.3064	20.644	19.2813	20.631	20.5038	20.3787	19.5922	20.5203	20.5535	20.6792	20.5302	20.8589	19.021	B4GALT7	Q9UBV7	Beta-1,4-galactosyltransferase 7 OS=Homo sapiens OX=9606 GN=B4GALT7 PE=1 SV=1	4	41
20.087	19.9284	20.3285	20.142	19.3118	19.9832	20.086	19.8463	19.7472	20.2065	20.0144	18.7879	19.8024	19.5884	19.9896	19.8841	19.8671	19.0673	18.9271	19.879	19.703	20.0798	19.6883	20.1366	20.1694	20.2554	20.1991	19.4967	19.765	19.9211	20.2225	20.0563	19.3574	19.7233	19.4303	19.951	19.9726	19.2616	19.7984	19.6766	19.9044	20.0037	19.2055	19.8613	19.9111	B4GAT1	O43505	Beta-1,4-glucuronyltransferase 1 OS=Homo sapiens OX=9606 GN=B4GAT1 PE=1 SV=1	4	41
19.9905	18.6392	18.7538	20.2958	22.2142	19.7725	20.943	21.1932	21.0139	24.1638	21.0301	23.054	21.5665	21.3133	21.7112	21.5396	20.8316	19.6454	20.9359	20.5808	20.5163	20.2964	20.621	21.3928	21.4027	21.1777	19.9102	21.5604	20.5697	21.4679	20.2666	20.232	20.252	21.0136	20.9538	21.5336	20.8272	20.828	20.0619	22.5513	21.0755	22.5664	21.5144	22.7596	20.4398	TMLHE	Q9NVH6	Trimethyllysine dioxygenase, mitochondrial OS=Homo sapiens OX=9606 GN=TMLHE PE=1 SV=1	4	41
23.6805	23.468	23.5185	23.6777	23.0512	23.3802	23.1583	23.2548	23.1145	23.1021	22.9346	22.9563	23.0245	23.2134	23.1987	22.6791	23.0856	23.5381	23.3683	23.2418	22.7365	23.3559	23.3328	23.0204	23.0006	22.6472	22.7311	23.2811	23.5046	23.0332	22.8338	22.9609	23.007	22.8815	23.4189	22.9583	23.3868	23.5052	23.8409	23.3508	23.0469	23.036	23.3041	23.1616	23.4096	CLCC1	Q96S66	Chloride channel CLIC-like protein 1 OS=Homo sapiens OX=9606 GN=CLCC1 PE=1 SV=1	4	41
24.6316	24.5723	24.4588	24.2507	24.4672	24.5917	24.3874	24.8152	25.0459	23.5749	24.7958	24.4317	24.2813	24.5471	24.5633	24.4849	24.6701	24.2858	24.7533	24.703	24.464	24.3624	24.5243	24.7381	24.5822	23.7739	24.1733	24.1913	24.5149	24.7466	24.739	24.4599	24.4467	24.3434	24.5955	24.2363	24.3754	24.5269	24.883	24.5251	24.4839	24.3098	24.3507	23.1702	24.4335	SNTB2	Q13425	Beta-2-syntrophin OS=Homo sapiens OX=9606 GN=SNTB2 PE=1 SV=1	4	41
32.5831	32.9016	32.8062	32.7808	32.3786	32.6668	32.429	32.35	32.4935	32.1504	32.5343	32.7016	32.6775	32.6663	32.6678	32.4584	32.5909	32.6846	32.6335	32.7084	32.4929	32.8617	32.7735	32.6487	32.699	32.4968	32.6826	32.7418	32.7352	32.7526	32.5741	32.7053	32.4813	32.8328	32.6415	32.4278	32.6536	32.7232	32.5827	32.6431	32.4517	32.3441	32.5708	31.4818	32.5239	ACTBL2	Q562R1	Beta-actin-like protein 2 OS=Homo sapiens OX=9606 GN=ACTBL2 PE=1 SV=2	4	41
NaN	NaN	NaN	NaN	NaN	NaN	NaN	NaN	NaN	NaN	NaN	NaN	NaN	NaN	NaN	21.6001	21.0789	NaN	NaN	NaN	21.2251	NaN	NaN	NaN	NaN	20.3245	NaN	NaN	NaN	NaN	NaN	NaN	21.825	NaN	NaN	19.858	NaN	NaN	NaN	NaN	NaN	NaN	NaN	NaN	NaN	ADD2	P35612	Beta-adducin OS=Homo sapiens OX=9606 GN=ADD2 PE=1 SV=3	0	6
15.9052	16.5515	NaN	15.4437	19.1707	18.3123	NaN	16.8198	18.3695	21.9361	16.7566	21.3998	19.6219	18.1301	20.5806	17.8869	18.575	17.495	18.7856	18.4267	NaN	17.3855	16.2	NaN	18.1307	17.8845	18.2281	17.4052	19.064	17.0373	17.7802	16.8565	19.0522	18.5339	17.5542	18.4912	17.688	15.7452	19.5008	20.7951	20.0042	19.4402	16.4244	20.6493	15.687	CLYBL	Q8N0X4	Citramalyl-CoA lyase, mitochondrial OS=Homo sapiens OX=9606 GN=CLYBL PE=1 SV=2	3	38
NaN	18.426	16.5885	14.9943	18.7659	17.9021	18.8085	18.5608	18.9823	16.7148	18.3882	18.4518	18.538	18.8735	14.8622	18.0807	19.1116	18.0714	17.9033	16.7723	18.2749	NaN	17.2039	18.5319	18.5962	17.5392	18.869	18.2055	18.7426	18.4835	18.1295	16.7135	19.3353	16.8064	16.1258	17.95	14.8885	17.0644	17.8801	18.9111	NaN	18.5268	18.1543	NaN	16.4497	CDK8	P49336	Cyclin-dependent kinase 8 OS=Homo sapiens OX=9606 GN=CDK8 PE=1 SV=1	3	38
21.8976	22.6501	22.4407	22.2995	22.5848	23.5436	24.0945	23.0724	23.1499	22.9865	24.2956	23.4167	22.5708	22.7877	23.3246	22.8871	23.2355	22.4028	22.8139	22.6425	22.5951	22.707	23.151	23.4111	23.227	23.6805	24.461	23.0948	22.5247	23.4602	23.8434	23.092	21.979	23.1116	23.3249	22.6397	23.0114	22.4524	22.9587	22.6822	22.7351	22.6231	22.7698	22.9569	23.9515	CNTNAP1	P78357	Contactin-associated protein 1 OS=Homo sapiens OX=9606 GN=CNTNAP1 PE=1 SV=1	4	41
25.6114	25.6221	25.736	25.2193	25.6638	25.2793	25.3073	25.5179	25.4574	25.406	25.3929	25.5112	25.2138	25.3995	25.5504	25.6364	25.6334	25.4156	25.6313	25.315	25.586	25.6162	25.6685	25.6523	25.6756	25.6527	25.3637	25.4072	25.586	25.3615	25.4993	25.5488	25.4685	25.5992	25.5811	25.7535	25.4298	25.6164	25.3723	25.671	25.6046	25.4984	25.618	25.0594	25.5291	CTNNBL1	Q8WYA6	Beta-catenin-like protein 1 OS=Homo sapiens OX=9606 GN=CTNNBL1 PE=1 SV=1	4	41
22.9453	23.1877	23.0236	22.3594	22.7338	23.269	23.6782	23.6807	22.4998	21.9344	22.9605	23.4802	23.6637	22.9438	23.7025	23.2781	23.667	23.0014	23.075	22.794	24.0767	23.8444	23.002	23.9077	22.986	22.3873	22.732	23.3407	23.0708	23.6555	22.6577	22.734	22.7889	22.7928	22.865	22.7945	22.6687	22.7412	23.4965	23.4384	22.8004	22.7766	22.7956	21.4849	23.6758	ACTR1B	P42025	Beta-centractin OS=Homo sapiens OX=9606 GN=ACTR1B PE=1 SV=1	4	41
25.4528	25.1687	25.396	25.4711	24.9906	25.3579	25.5655	25.1958	25.2293	25.5162	25.4786	25.3915	25.2916	25.1347	25.2609	25.5675	25.4083	25.3193	25.2246	25.3049	25.2977	25.345	25.366	25.228	25.0985	25.5861	25.4587	25.1752	25.1162	25.6305	25.5316	25.5516	25.1431	25.3726	25.5148	25.6536	25.3465	25.3208	25.4769	25.2997	25.8165	25.691	25.1866	25.0841	25.4662	GLB1	P16278	Beta-galactosidase OS=Homo sapiens OX=9606 GN=GLB1 PE=1 SV=2	4	41
19.3533	17.7395	20.3313	19.4021	22.2262	20.7897	18.9274	20.9448	20.4007	24.4841	21.2155	22.2702	20.86	20.6898	23.2043	22.0823	20.802	21.1423	20.7077	21.6291	19.9172	20.7471	20.2962	20.7309	21.0209	22.7213	20.5912	22.1954	20.6751	19.9239	21.344	19.6706	21.441	22.1246	21.655	19.9289	21.0503	19.4585	20.766	22.29	21.4494	23.0794	18.6875	23.9293	19.4787	THEM6	Q8WUY1	Protein THEM6 OS=Homo sapiens OX=9606 GN=THEM6 PE=1 SV=2	4	41
25.6462	25.7764	25.7623	25.9236	25.4494	25.7351	25.8793	25.7565	25.7043	25.659	25.7415	25.716	25.8127	25.7076	25.7929	25.8849	25.9877	25.7333	25.7611	25.6964	25.8846	25.9781	25.8238	25.9108	25.8128	25.9777	26.0043	25.879	25.968	25.9571	25.9642	25.8564	25.7368	25.6929	25.9458	25.9365	25.697	25.913	25.7339	25.764	25.9837	25.8758	25.6635	25.8548	26.0272	HEXA	P06865	Beta-hexosaminidase subunit alpha OS=Homo sapiens OX=9606 GN=HEXA PE=1 SV=2	4	41
27.4391	27.3212	27.4537	27.4494	27.168	27.375	27.5268	27.2456	27.2952	27.9772	27.4404	27.4248	27.1364	27.207	27.4571	27.3958	27.2918	27.4468	27.4055	27.2906	27.2855	27.3273	27.5153	27.4408	27.372	27.8079	27.4742	27.468	27.1606	27.4097	27.58	27.4546	27.1802	27.3951	27.3488	27.4249	27.4344	27.3652	27.3136	27.3	27.4516	27.5615	27.2412	27.1391	27.4768	HEXB	P07686	Beta-hexosaminidase subunit beta OS=Homo sapiens OX=9606 GN=HEXB PE=1 SV=3	4	41
20.4993	19.4027	21.0732	22.129	20.7445	20.813	19.6997	19.9913	18.8755	NaN	19.2254	21.683	20.8381	21.5662	20.7224	19.4332	20.0211	21.1903	21.7028	21.7567	18.2613	21.0445	19.9105	20.9202	21.3904	NaN	21.2629	21.0568	21.5255	17.5541	18.8135	20.7904	21.9515	21.5829	21.5991	18.5489	21.1638	20.9802	19.9498	21.0062	19.1333	19.5964	20.1205	NaN	21.568	BHMT	Q93088	Betaine--homocysteine S-methyltransferase 1 OS=Homo sapiens OX=9606 GN=BHMT PE=1 SV=2	4	38
24.4444	24.6021	24.5394	24.2251	24.4841	24.5226	24.7848	24.4545	24.5483	24.5537	24.5255	24.5884	24.4886	24.278	24.5801	24.6086	24.6396	24.5018	24.5301	24.465	24.6157	24.5133	24.6986	24.7655	24.7226	24.3653	24.6574	24.5351	24.6699	24.4647	24.7267	24.449	24.4199	24.5479	24.5729	24.3214	24.5813	24.4667	24.7142	24.5663	24.6193	24.6526	24.4385	23.1078	24.7327	MANBA	O00462	Beta-mannosidase OS=Homo sapiens OX=9606 GN=MANBA PE=1 SV=3	4	41
20.462	19.8237	20.3034	20.272	20.541	20.208	20.8155	21.2286	20.5398	20.201	20.4231	22.3149	23.1266	19.9846	21.9457	20.3896	20.5574	21.2072	20.5016	20.3222	20.6515	21.696	21.2467	21.1226	21.3511	21.3459	20.991	21.0778	20.1091	20.1731	21.1117	20.4501	22.4039	21.2581	20.3977	20.0201	21.3541	20.541	20.6132	21.2623	20.5711	20.3387	20.7849	19.9866	21.37	PARVB	Q9HBI1	Beta-parvin OS=Homo sapiens OX=9606 GN=PARVB PE=1 SV=1	4	41
21.5903	21.4784	21.306	21.4626	21.2579	21.6419	21.716	21.8318	21.7008	20.1068	21.4058	21.3056	21.3968	21.4813	21.1666	21.9683	21.418	21.7661	21.7118	21.7057	21.9877	21.9025	21.9877	22.0807	21.1995	20.9533	21.2411	21.3754	22.1379	22.1965	21.6638	21.688	21.0484	21.7513	21.934	21.5295	22.2121	21.9206	21.1689	22.3583	21.2198	20.8855	22.1447	18.9527	21.3435	SGCB	Q16585	Beta-sarcoglycan OS=Homo sapiens OX=9606 GN=SGCB PE=1 SV=1	4	41
17.1962	17.3251	17.4653	16.8136	17.2063	17.2014	17.7603	17.5043	17.6129	16.8847	17.5475	17.552	17.2947	17.3263	17.1977	17.1634	17.31	17.3372	17.0086	17.0618	17.5403	17.1856	17.2555	17.248	17.2531	16.8788	17.1856	17.3427	17.4706	17.3656	17.3306	17.0734	17.2782	17.1895	17.3512	17.3534	17.3588	17.2085	17.1151	17.1226	17.0614	17.1599	16.9488	16.2453	17.178	BACE1	P56817	Beta-secretase 1 OS=Homo sapiens OX=9606 GN=BACE1 PE=1 SV=3	4	41
23.6713	22.7992	23.3628	22.8134	22.5446	23.3271	23.0654	21.9774	22.8013	24.4583	22.6347	22.9952	23.0104	22.7274	22.5472	22.4611	22.7613	22.2276	23.2762	21.9666	22.9901	23.5169	22.4924	22.7035	22.7666	23.9769	23.31	22.3957	22.2754	22.9111	23.7435	23.4373	22.7899	23.7388	23.2315	23.5315	23.4832	23.5861	23.6561	23.3629	23.789	23.6485	23.0334	22.9452	23.9475	BID	P55957	BH3-interacting domain death agonist OS=Homo sapiens OX=9606 GN=BID PE=1 SV=1	4	41
25.596	25.4428	25.5803	25.4118	25.7627	25.4994	25.4269	25.5789	25.4333	25.1536	25.4892	25.3804	25.5368	25.3719	25.5491	25.416	25.2425	25.433	25.4181	25.4324	25.4151	25.5317	25.4716	25.396	25.3746	25.2821	25.378	25.2833	25.3537	25.3774	25.4028	25.5829	25.2814	25.6355	25.6188	25.3898	25.3555	25.4309	25.2968	25.5067	25.4765	25.508	25.2237	24.6595	25.523	PAPSS1	O43252	Bifunctional 3'-phosphoadenosine 5'-phosphosulfate synthase 1 OS=Homo sapiens OX=9606 GN=PAPSS1 PE=1 SV=2	4	41
27.5113	27.2715	27.3935	27.4712	27.7382	27.5908	27.6024	27.6767	27.6608	27.223	27.8606	27.5358	27.339	27.4663	27.4972	27.3644	27.3862	27.5444	27.5827	27.0571	27.2386	27.2727	27.3221	27.2264	27.2633	26.7302	27.9442	27.5536	27.4757	27.4574	27.7177	27.6138	27.6282	27.8744	27.7748	27.7261	27.8581	27.8295	27.7752	27.9498	27.5743	27.6475	27.9273	27.0179	27.9272	PAPSS2	O95340	Bifunctional 3'-phosphoadenosine 5'-phosphosulfate synthase 2 OS=Homo sapiens OX=9606 GN=PAPSS2 PE=1 SV=2	4	41
22.0879	22.1347	21.9891	22.3132	21.84	21.9753	22.2277	22.1625	21.9759	22.0889	22.1862	22.107	22.0342	21.9357	21.8767	22.0357	21.9908	22.2646	22.0724	22.187	21.9976	21.8766	21.7934	22.2588	22.1106	21.7852	22.8477	22.0032	22.5466	22.2017	22.3401	22.3734	22.0234	22.3093	22.2025	22.2982	22.0546	22.3035	22.0067	22.1042	22.5746	22.4637	21.9445	21.4308	22.2133	JMJD6	Q6NYC1	Bifunctional arginine demethylase and lysyl-hydroxylase JMJD6 OS=Homo sapiens OX=9606 GN=JMJD6 PE=1 SV=1	4	41
23.7324	23.7483	23.7494	23.8968	24.2962	23.9393	23.8085	24.139	23.8756	25.25	23.7598	24.1551	23.9715	24.0581	24.6989	24.2728	24.1683	23.878	23.7861	23.9764	24.0004	23.9356	23.9218	23.7568	23.9778	24.0877	24.0613	23.8492	23.9283	23.7992	23.8577	23.7319	23.9497	24.1188	23.8099	23.9834	23.6535	23.9404	23.9193	24.0235	23.9532	24.3376	24.1849	24.1115	23.7754	COASY	Q13057	Bifunctional coenzyme A synthase OS=Homo sapiens OX=9606 GN=COASY PE=1 SV=4	4	41
28.8748	28.8575	28.9227	28.8602	28.9481	28.971	28.8766	28.9137	28.8162	28.4747	28.7401	28.8128	28.8216	28.8369	28.8356	28.8488	28.8528	28.9553	28.8784	28.8534	28.907	28.8707	28.977	28.8867	28.9227	28.3785	28.7191	28.8405	28.8554	28.9398	28.7951	28.8191	28.7967	28.8575	28.9593	28.7108	28.9468	28.9033	28.9202	28.8977	28.8861	28.7091	28.9086	27.4732	28.8358	EPRS1	P07814	Bifunctional glutamate/proline--tRNA ligase OS=Homo sapiens OX=9606 GN=EPRS1 PE=1 SV=5	4	41
21.7904	21.8978	21.5283	21.6513	22.2012	21.6312	21.6227	21.632	22.0391	21.3651	21.0445	21.2079	21.5828	21.985	21.6539	21.6964	22.2494	21.8038	21.4292	22.1147	21.9583	22.1562	21.7431	22.0305	21.9266	21.736	21.4778	21.57	21.5129	21.796	21.5097	21.6515	21.7901	21.6638	21.5432	21.2971	21.4336	21.6995	21.0278	21.4128	21.5458	21.4411	21.6922	20.5304	21.4979	NDST1	P52848	Bifunctional heparan sulfate N-deacetylase/N-sulfotransferase 1 OS=Homo sapiens OX=9606 GN=NDST1 PE=1 SV=1	4	41
[truncated: 6,365 more rows]
[truncated: 34 more columns]

## Sheet: 2_301 AML-induced proteins
T: Accession	T: Description	T: Gene Symbol	Count MSC-control	Count MSC+AML-CM
Q9UBW5	Bridging integrator 2 OS=Homo sapiens OX=9606 GN=BIN2 PE=1 SV=3	BIN2	0	40
P15498	Proto-oncogene vav OS=Homo sapiens OX=9606 GN=VAV1 PE=1 SV=4	VAV1	0	40
[truncated: 299 more rows]

## Sheet: 3_MSC ctr vs MSCwAML-CM
T: Gene Symbol	T: Accession	T: Description	Count MSC-Control	Count MSC+AML-CM	Median MSC	Median MSC+AML-CM	Fold change	FC p-value (Z-score)	t-test p-value
[truncated: 201 more rows]

[truncated: 1 more sheets: Tabelldesign]
